# Supplementary material for: A plasma protein biomarker signature that differentiates acute rheumatic fever from related clinical presentations
Source: Research Square preprint supplement (doi:10.21203/rs.3.rs-4345781/v1), 2025-05-05
Supplement: Supplementary file 1 [file a35ed7f7e0a18d2eb3813a58.xlsx]

## Sheet: Clinical Metadata
SubjectID	Cohort	Site	Final Study Diagnosis	Initial or Recurrent ARF?	Carditis	Joint symptoms	Chorea	Erythema marginatum	SC nodules	Prolonged PR	Monoarthralgia	Fever	ESR >30	CRP >3	Group A Strep POC	malaria	HIV	Influenza	Echo results
ARF2008	Discovery	Mulago	Definite RF	Initial	yes	polyarthritis	no	no	no	yes	no	no	yes	no	Negative	Negative	Negative	Negative	Rheumatic carditis, mild mitral regurgitation
ARF2016	Discovery	Mulago	Definite RF	Initial	no	polyarthralgia	no	no	no	yes	no	yes	yes	no	Negative	Negative	Negative	Negative	normal
ARF2023	Discovery	Mulago	Definite RF	Initial	yes	polyarthralgia	no	no	no	no	no	yes	no	no	Negative	Negative	Negative	Negative	Rheumatic carditis, severe mitral regurgitation
ARF2029	Discovery	Mulago	Definite RF	Initial	no	polyarthralgia	no	no	no	no	no	yes	yes	yes	Negative	Negative	Negative	Negative	normal
ARF2032	Discovery	Mulago	Definite RF	Initial	no	polyarthralgia	no	no	no	yes	no	yes	yes	no	Negative	Negative	Negative	Negative	normal
ARF2033	Discovery	Mulago	Definite RF	Initial	no	polyarthralgia	no	no	no	yes	no	yes	yes	no	Negative	Negative	Negative	Negative	normal
ARF2034	Discovery	Mulago	Definite RF	Initial	yes	polyarthralgia	no	no	no	yes	no	yes	yes	no	Negative	Negative	Negative	Negative	Rheumatic carditis, moderate mitral regurgitation and mild aortic insufficiency, small pericardial effusion
ARF2039	Discovery	Mulago	Definite RF	Initial	no	polyarthralgia	no	no	no	yes	no	yes	no	no	Negative	Negative	Negative	Negative	normal
ARF2049	Discovery	Mulago	Definite RF	Initial	no	polyarthralgia	no	no	no	yes	no	yes	no	no	Negative	Negative	Negative	Negative	normal
ARF2061	Discovery	Mulago	Definite RF	Initial	no	monoarthritis	no	no	no	yes	no	no	yes	no	POC Positive	Negative	Negative	Negative	normal
ARF2071	Discovery	Mulago	Definite RF	Initial	no	polyarthralgia	no	no	no	yes	no	yes	no	no	POC Positive	Negative	Negative	Negative	normal
ARF2076	Discovery	Mulago	Definite RF	Initial	no	polyarthralgia	no	no	no	yes	no	yes	yes	no	Negative	Negative	Negative	Flu A	normal
ARF2080	Discovery	Mulago	Definite RF	Initial	yes	polyarthralgia	no	no	no	yes	no	yes	yes	no	POC Positive	Negative	Negative	Negative	Rheumatic carditis, severe mitral regurgitation, moderate aortic insufficiency
ARF2084	Discovery	Mulago	Definite RF	Initial	no	polyarthralgia	no	no	no	yes	no	yes	yes	no	Negative	Negative	Negative	Negative	normal
ARF2111	Discovery	Mulago	Definite RF	Initial	no	polyarthralgia	no	no	no	yes	no	yes	yes	no	Negative	Negative	Negative	Negative	normal
ARF2114	Discovery	Mulago	Definite RF	Initial	no	polyarthralgia	no	no	no	yes	no	yes	no	no	Negative	Negative	Negative	Negative	normal
ARF2134	Discovery	Mulago	Definite RF	Initial	yes	polyarthralgia	no	no	no	yes	no	no	yes	no	Negative	Negative	Negative	Negative	Rheumatic carditis, severe mitral regurgitation, moderate aortic insufficiency
ARF2142	Discovery	Mulago	Definite RF	Initial	yes	no	yes	no	no	no	no	no	no	no	Negative	Negative	Negative	No result	Rheumatic carditis, moderate mitral regurgitation
ARF2166	Discovery	Mulago	Definite RF	Initial	yes	polyarthralgia	no	no	no	yes	no	yes	no	no	POC Positive	Negative	Negative	Negative	Rheumatic carditis, severe mitral regurgitation, moderate aortic insufficiency
ARF2167	Discovery	Mulago	Definite RF	Initial	yes	polyarthralgia	no	no	no	yes	no	yes	yes	no	Negative	Negative	Negative	Negative	Rheumatic carditis, mild mitral regurgitation and moderate aortic insufficiency
ARF2171	Discovery	Mulago	Definite RF	Initial	no	polyarthralgia	no	no	no	yes	no	yes	yes	no	POC Positive	Negative	Negative	No result	normal
ARF2173	Discovery	Mulago	Definite RF	Initial	yes	polyarthralgia	no	no	no	yes	no	no	no	no	Negative	Positive	Negative	No result	Rheumatic carditis, severe mitral regurgitation, mild aortic insufficiency
C001	Discovery	Mulago	Healthy Control	n/a	no	no	no	no	no	no	no	no	no	no	Negative	Negative	Negative	No result	normal
C004	Discovery	Mulago	Healthy Control	n/a	no	no	no	no	no	no	no	no	no	no	Positive	Negative	Negative	No result	normal
C008	Discovery	Mulago	Healthy Control	n/a	no	no	no	no	no	no	no	no	no	no	Negative	Negative	Negative	No result	normal
C022	Discovery	Mulago	Healthy Control	n/a	no	no	no	no	no	no	no	no	no	no	Negative	Negative	Negative	No result	normal
C029	Discovery	Mulago	Healthy Control	n/a	no	no	no	no	no	no	no	no	no	no	Negative	Negative	Negative	No result	normal
C031	Discovery	Mulago	Healthy Control	n/a	no	no	no	no	no	no	no	no	no	no	Negative	Negative	Negative	No result	normal
C032	Discovery	Mulago	Healthy Control	n/a	no	no	no	no	no	no	no	no	no	no	Negative	Negative	Negative	No result	normal
C038	Discovery	Mulago	Healthy Control	n/a	no	no	no	no	no	no	no	no	no	no	Negative	Negative	Negative	No result	normal
C041	Discovery	Mulago	Healthy Control	n/a	no	no	no	no	no	no	no	no	no	no	Negative	Negative	Negative	No result	normal
C043	Discovery	Mulago	Healthy Control	n/a	no	no	no	no	no	no	no	no	no	no	Negative	Negative	Negative	No result	normal
C045	Discovery	Mulago	Healthy Control	n/a	no	no	no	no	no	no	no	no	no	no	Negative	Negative	Negative	No result	normal
C046	Discovery	Mulago	Healthy Control	n/a	no	no	no	no	no	no	no	no	no	no	Negative	Negative	Negative	No result	normal
C048	Discovery	Mulago	Healthy Control	n/a	no	no	no	no	no	no	no	no	no	no	Negative	Negative	Negative	No result	normal
C050	Discovery	Mulago	Healthy Control	n/a	no	no	no	no	no	no	no	no	no	no	Negative	Negative	Negative	No result	normal
C051	Discovery	Mulago	Healthy Control	n/a	no	no	no	no	no	no	no	no	no	no	Negative	Negative	Negative	No result	normal
C056	Discovery	Mulago	Healthy Control	n/a	no	no	no	no	no	no	no	no	no	no	Negative	Negative	Negative	No result	normal
C024	Discovery	Mulago	Known alternate diagnosis	n/a	no	polyarthralgia	no	no	no	no	no	yes	no	yes	Negative	Negative	Negative	No result	Other heart disease: Moderate tricuspid regurgitation, possible pulmonary hypertension
C026	Discovery	Mulago	Known alternate diagnosis	n/a	no	polyarthritis	no	no	no	no	no	no	no	no	Negative	Negative	Negative	No result	normal
C086	Discovery	Mulago	Known alternate diagnosis	n/a	no	no	no	no	no	no	no	yes	no	no	Negative	Negative	Negative	No result	normal
C088	Discovery	Mulago	Known alternate diagnosis	n/a	no	polyarthritis	no	no	no	no	no	yes	no	no	Negative	Negative	Negative	No result	normal
C091	Discovery	Mulago	Known alternate diagnosis	n/a	no	polyarthralgia	no	no	no	no	no	yes	no	no	Negative	Negative	Negative	No result	normal
C093	Discovery	Mulago	Known alternate diagnosis	n/a	no	no	no	no	no	no	no	yes	no	no	Negative	Negative	Negative	No result	normal
C094	Discovery	Mulago	Known alternate diagnosis	n/a	no	polyarthralgia	no	no	no	no	no	yes	yes	yes	Negative	Negative	Negative	No result	normal
C096	Discovery	Mulago	Known alternate diagnosis	n/a	no	polyarthritis	no	no	no	no	no	yes	no	yes	Negative	Negative	Negative	No result	normal
C097	Discovery	Mulago	Known alternate diagnosis	n/a	no	polyarthralgia	no	no	no	no	no	yes	no	yes	Negative	Negative	Negative	No result	normal
ARF2031	Discovery	Mulago	Possible RF	Initial	no	polyarthralgia	no	no	no	yes	no	no	no	no	Negative	Negative	Negative	No result	normal
ARF2035	Discovery	Mulago	Possible RF	Initial	no	polyarthralgia	no	no	no	yes	no	no	no	no	Negative	Negative	Negative	Negative	normal
ARF2038	Discovery	Mulago	Possible RF	Initial	no	polyarthralgia	no	no	no	no	no	yes	no	no	POC Positive	Negative	Negative	No result	normal
ARF2051	Discovery	Mulago	Possible RF	Initial	no	no	no	no	no	yes	yes	no	no	no	Negative	Negative	Negative	Negative	normal
ARF2057	Discovery	Mulago	Possible RF	Initial	no	polyarthralgia	no	no	no	no	no	yes	yes	no	Negative	Negative	Negative	Negative	normal
ARF2062	Discovery	Mulago	Possible RF	Initial	no	polyarthralgia	no	no	no	yes	no	no	no	no	POC Positive	Negative	Negative	Negative	normal
ARF2067	Discovery	Mulago	Possible RF	Initial	no	polyarthralgia	no	no	no	yes	no	no	no	no	Negative	Negative	Negative	Negative	normal
ARF2073	Discovery	Mulago	Possible RF	Initial	no	polyarthralgia	no	no	no	yes	no	no	no	no	POC Positive	Negative	Negative	Negative	normal
ARF2081	Discovery	Mulago	Possible RF	Initial	no	polyarthralgia	no	no	no	yes	no	no	no	no	Negative	Negative	Negative	Negative	normal
ARF2083	Discovery	Mulago	Possible RF	Initial	no	polyarthralgia	no	no	no	yes	no	no	no	no	Negative	Negative	Negative	No result	normal
ARF2090	Discovery	Mulago	Possible RF	Initial	no	monoarthritis	no	no	no	yes	no	no	no	no	POC Positive	Negative	Negative	Negative	normal
ARF2098	Discovery	Mulago	Possible RF	Initial	no	polyarthralgia	no	no	no	yes	no	no	no	no	Negative	Negative	Negative	Negative	normal
ARF2099	Discovery	Mulago	Possible RF	Initial	no	monoarthritis	no	no	no	yes	no	no	no	no	Negative	Negative	Negative	Negative	normal
ARF2105	Discovery	Mulago	Possible RF	Initial	no	polyarthralgia	no	no	no	yes	no	no	no	no	POC Positive	Negative	Negative	Negative	normal
ARF2120	Discovery	Mulago	Possible RF	Initial	no	polyarthralgia	no	no	no	yes	no	no	no	no	Negative	Negative	Negative	No result	normal
ARF2121	Discovery	Mulago	Possible RF	Initial	no	polyarthralgia	no	no	no	yes	no	no	yes	no	Negative	Negative	Negative	No result	normal
ARF2133	Discovery	Mulago	Possible RF	Initial	no	polyarthralgia	no	no	no	yes	no	no	no	no	Negative	Negative	Negative	Negative	normal
ARF2138	Discovery	Mulago	Possible RF	Initial	no	no	no	no	no	yes	no	yes	yes	no	Negative	Negative	Negative	Negative	normal
ARF2139	Discovery	Mulago	Possible RF	Initial	no	polyarthralgia	no	no	no	yes	no	no	no	no	Negative	Negative	Negative	Negative	normal
ARF2141	Discovery	Mulago	Possible RF	Initial	no	no	no	no	no	yes	yes	no	no	no	POC Positive	Negative	Negative	Negative	normal
ARF2153	Discovery	Mulago	Possible RF	Initial	no	no	no	no	no	no	yes	no	no	no	Negative	Negative	Negative	No result	normal
ARF2155	Discovery	Mulago	Possible RF	Initial	no	no	no	no	no	yes	yes	no	no	no	Negative	Negative	Negative	Negative	normal
ARF2159	Discovery	Mulago	Possible RF	Initial	no	polyarthralgia	no	no	no	yes	no	no	no	no	Negative	Negative	Negative	Negative	normal
C060	Discovery	Mulago	RHD (without RF)	n/a	no	no	no	no	no	no	no	no	no	no	Negative	Negative	Negative	No result	Rheumatic heart disease, severe mitral regurgitation
C061	Discovery	Mulago	RHD (without RF)	n/a	no	no	no	no	no	no	no	no	no	no	Negative	Negative	Negative	No result	Rheumatic heart disease, s/p mitral valve replacement, moderate aortic insufficiency
C062	Discovery	Mulago	RHD (without RF)	n/a	no	no	no	no	no	no	no	no	no	no	Negative	Negative	Negative	No result	Rheumatic heart disease, severe mitral regurgitation
C066	Discovery	Mulago	RHD (without RF)	n/a	no	no	no	no	no	no	no	no	no	no	Negative	Negative	Negative	No result	Rheumatic heart disease, severe mitral regurgitation
C067	Discovery	Mulago	RHD (without RF)	n/a	no	no	no	no	no	no	no	no	no	no	Negative	Negative	Negative	No result	Rheumatic heart disease, severe mitral regurgitation, mild mitral stenosis
C068	Discovery	Mulago	RHD (without RF)	n/a	no	no	no	no	no	no	no	no	no	no	Negative	Negative	Negative	No result	Rheumatic heart disease, moderate mitral regurgitation
C071	Discovery	Mulago	RHD (without RF)	n/a	no	no	no	no	no	no	no	no	no	no	Negative	Negative	Negative	No result	Rheumatic heart disease, mild mitral regurgitation
C072	Discovery	Mulago	RHD (without RF)	n/a	no	no	no	no	no	no	no	no	no	no	Negative	Negative	Negative	No result	Rheumatic heart disease, severe mitral regurgitation
C073	Discovery	Mulago	RHD (without RF)	n/a	no	no	no	no	no	no	no	no	no	no	Negative	Negative	Negative	No result	Rheumatic heart disease, moderate mitral stenosis, trivial mitral regurgitation
C074	Discovery	Mulago	RHD (without RF)	n/a	no	no	no	no	no	no	no	no	no	no	Negative	Negative	Negative	No result	Rheumatic heart disease, severe mitral regurgitation, mild mitral stenosis, moderate aortic insufficiency
C075	Discovery	Mulago	RHD (without RF)	n/a	no	no	no	no	no	no	no	no	no	no	Negative	Negative	Negative	No result	Rheumatic heart disease, severe mitral regurgitation, moderate aortic insufficiency
C079	Discovery	Mulago	RHD (without RF)	n/a	no	no	no	no	no	no	no	no	no	no	Negative	Negative	Negative	No result	Rheumatic heart disease, moderate mitral regurgitation
C080	Discovery	Mulago	RHD (without RF)	n/a	no	no	no	no	no	no	no	no	no	no	Negative	Negative	Negative	No result	Rheumatic heart disease, severe mitral regurgitation, mild aortic insufficiency
C081	Discovery	Mulago	RHD (without RF)	n/a	no	no	no	no	no	no	no	no	no	no	Negative	Negative	Negative	No result	Rheumatic heart disease, severe aortic insufficiency
C085	Discovery	Mulago	RHD (without RF)	n/a	no	no	no	no	no	no	no	no	no	no	Negative	Negative	Negative	No result	Rheumatic heart disease, moderate mitral regurgitation, mild mitral stenosis, moderate aortic insufficiency
ARF2036	Discovery	Mulago	Unknown alternate diagnosis	n/a	no	polyarthralgia	no	no	no	no	no	no	no	no	Negative	Negative	Negative	Negative	normal
ARF2046	Discovery	Mulago	Unknown alternate diagnosis	n/a	no	polyarthralgia	no	no	no	yes	no	no	no	no	Negative	Negative	Negative	Negative	normal
ARF2058	Discovery	Mulago	Unknown alternate diagnosis	n/a	no	polyarthralgia	no	no	no	yes	no	no	yes	no	Negative	Negative	Negative	Negative	normal
ARF2059	Discovery	Mulago	Unknown alternate diagnosis	n/a	no	polyarthralgia	no	no	no	yes	no	no	no	no	Negative	Negative	Negative	Negative	normal
ARF2060	Discovery	Mulago	Unknown alternate diagnosis	n/a	no	polyarthralgia	no	no	no	no	no	no	yes	no	Negative	Negative	Negative	Negative	normal
ARF2069	Discovery	Mulago	Unknown alternate diagnosis	n/a	no	no	no	no	no	yes	yes	no	no	no	Negative	Negative	Negative	Negative	normal
ARF2070	Discovery	Mulago	Unknown alternate diagnosis	n/a	no	polyarthralgia	no	no	no	yes	no	no	no	no	Negative	Negative	Negative	Negative	normal
ARF2106	Discovery	Mulago	Unknown alternate diagnosis	n/a	no	no	no	no	no	no	yes	yes	yes	no	Negative	Negative	Negative	Negative	normal
ARF2152	Discovery	Mulago	Unknown alternate diagnosis	n/a	no	no	no	no	no	yes	yes	no	no	no	Negative	Positive	Negative	No result	normal
ARF2154	Discovery	Mulago	Unknown alternate diagnosis	n/a	no	polyarthralgia	no	no	no	yes	no	yes	yes	no	POC Positive	Negative	Negative	Negative	normal
ARF2168	Discovery	Mulago	Unknown alternate diagnosis	n/a	no	polyarthralgia	no	no	no	yes	no	yes	yes	no	Negative	Negative	Negative	No result	normal
ARF2169	Discovery	Mulago	Unknown alternate diagnosis	n/a	no	polyarthralgia	no	no	no	yes	no	yes	yes	no	Negative	Negative	Negative	No result	normal
ARF2170	Discovery	Mulago	Unknown alternate diagnosis	n/a	no	polyarthralgia	no	no	no	yes	no	yes	yes	no	Negative	Negative	Negative	No result	normal
ARF2172	Discovery	Mulago	Unknown alternate diagnosis	n/a	no	polyarthralgia	no	no	no	yes	no	no	no	no	Negative	Negative	Negative	No result	normal
ARF2174	Discovery	Mulago	Unknown alternate diagnosis	n/a	no	polyarthralgia	no	no	no	yes	no	yes	yes	no	Negative	Positive	Negative	No result	normal
ARF4001	Validation	Mbarara	Definite RF	Initial	yes	none	no	no	no	yes	no	yes	yes	no	Negative	Negative	Negative	No result	Rheumatic carditis, severe mitral regurgitation, severe aortic insufficiency
ARF4004	Validation	Mbarara	Definite RF	Initial	yes	none	yes	no	no	no	yes	no	no	no	Negative	Negative	Negative	Negative	Rheumatic carditis, moderate mitral regurgitation
ARF4012	Validation	Mbarara	Definite RF	Initial	no	polyarthralgia	no	no	no	yes	no	no	yes	no	Positive	Negative	Negative	Negative	normal
ARF4016	Validation	Mbarara	Definite RF	Initial	no	polyarthralgia	no	no	no	yes	no	no	yes	no	Positive	Negative	Negative	No result	normal
ARF4018	Validation	Mbarara	Definite RF	Initial	no	polyarthritis	no	no	no	yes	no	no	yes	no	Negative	Negative	Negative	Negative	normal
ARF4021	Validation	Mbarara	Definite RF	Initial	no	polyarthralgia	no	no	no	yes	no	yes	yes	no	Positive	Negative	Negative	Negative	normal
ARF4026	Validation	Mbarara	Definite RF	Initial	yes	polyarthralgia	no	no	no	yes	no	yes	yes	no	Positive	Negative	Negative	No result	Rheumatic carditis, severe mitral regurgitation
ARF4034	Validation	Mbarara	Definite RF	Initial	yes	polyarthritis	no	no	no	yes	no	no	yes	no	Negative	Negative	Negative	Negative	Rheumatic carditis, mild mitral regurgitation
ARF4056	Validation	Mbarara	Definite RF	Initial	yes	none	no	no	no	yes	no	no	yes	no	Positive	Negative	Negative	No result	Rheumatic carditis, mild mitral regurgitation and mild aortic insufficiency
ARF4058	Validation	Mbarara	Definite RF	Initial	yes	polyarthritis	no	no	no	yes	no	yes	yes	no	Positive	Negative	Negative	Negative	Rheumatic carditis, severe mitral regurgitation, mild aortic insufficiency, small pericardial effusion
ARF4065	Validation	Mbarara	Definite RF	Initial	no	polyarthralgia	no	no	no	yes	no	no	no	yes	Positive	Negative	Negative	No result	normal
ARF4069	Validation	Mbarara	Definite RF	Initial	yes	polyarthralgia	no	no	no	yes	no	no	no	no	Negative	Negative	Negative	Negative	Rheumatic carditis, severe mitral regurgitation, mild aortic insufficiency
ARF4070	Validation	Mbarara	Definite RF	Initial	yes	polyarthritis	no	no	no	yes	no	no	yes	no	Positive	Negative	Negative	Negative	Rheumatic carditis, moderate mitral regurgitation
ARF4092	Validation	Mbarara	Definite RF	Initial	no	polyarthralgia	no	no	no	yes	no	no	yes	no	Negative	Negative	Negative	Negative	normal
ARF4098	Validation	Mbarara	Definite RF	Initial	no	polyarthralgia	no	no	no	yes	no	no	yes	no	Positive	Negative	Negative	Negative	normal
ARF4100	Validation	Mbarara	Definite RF	Initial	yes	polyarthralgia	no	no	no	yes	no	no	yes	no	Negative	Negative	Negative	No result	Rheumatic carditis, severe mitral regurgitation, mild aortic insufficiency
ARF4105	Validation	Mbarara	Definite RF	Initial	no	polyarthralgia	no	no	no	yes	no	no	yes	no	Positive	Negative	Negative	Negative	normal
ARF4109	Validation	Mbarara	Definite RF	Initial	no	polyarthralgia	no	no	no	yes	no	no	no	yes	Positive	Negative	Negative	Negative	normal
ARF4112	Validation	Mbarara	Definite RF	Initial	yes	polyarthritis	no	no	no	yes	no	yes	no	no	Positive	Negative	Negative	No result	Rheumatic carditis, trivial mitral regurgitation and moderate aortic insufficiency
ARF4124	Validation	Mbarara	Definite RF	Initial	no	polyarthralgia	no	no	no	yes	no	yes	no	no	Positive	Negative	Negative	No result	normal
ARF4127	Validation	Mbarara	Definite RF	Initial	no	polyarthritis	no	no	no	yes	no	no	yes	no	Positive	Negative	Negative	Negative	normal
ARF4129	Validation	Mbarara	Definite RF	Initial	yes	none	no	no	no	yes	no	yes	yes	no	Negative	Negative	Negative	Negative	Rheumatic carditis, severe mitral regurgitation
ARF4134	Validation	Mbarara	Definite RF	Initial	yes	polyarthritis	no	no	no	no	no	yes	yes	yes	Positive	Negative	Negative	Negative	Rheumatic carditis, severe mitral regurgitation, severe aortic insufficiency
ARF4137	Validation	Mbarara	Definite RF	Initial	yes	polyarthralgia	yes	no	no	no	no	no	no	no	Negative	Negative	Negative	Negative	Rheumatic carditis, mild mitral regurgitation, moderate aortic insufficiency
ARF4140	Validation	Mbarara	Definite RF	Initial	no	polyarthralgia	no	no	no	yes	no	yes	no	no	Negative	Negative	Negative	Negative	normal
ARF4141	Validation	Mbarara	Definite RF	Initial	yes	none	no	no	no	yes	no	yes	yes	no	Negative	Negative	Negative	Negative	Rheumatic carditis, severe mitral regurgitation, mild pericardial effusion
ARF4143	Validation	Mbarara	Definite RF	Initial	yes	none	no	no	no	yes	no	no	yes	no	Negative	Negative	Negative	Negative	Rheumatic carditis, moderate mitral regurgitation and mild aortic insufficiency
ARF4145	Validation	Mbarara	Definite RF	Initial	no	none	yes	no	no	no	no	no	no	no	Positive	Negative	Negative	Negative	normal
ARF4010	Validation	Mbarara	Possible RF	Initial	no	polyarthralgia	no	no	no	yes	no	no	no	no	Negative	Negative	Negative	Negative	normal
ARF4014	Validation	Mbarara	Possible RF	Initial	no	polyarthralgia	no	no	no	yes	no	no	no	no	Negative	Negative	Negative	Negative	normal
ARF4032	Validation	Mbarara	Possible RF	Initial	no	polyarthritis	no	no	no	no	no	no	no	no	Positive	Negative	Negative	Negative	normal
ARF4038	Validation	Mbarara	Possible RF	Initial	no	polyarthralgia	no	no	no	yes	no	no	no	no	Positive	Negative	Negative	Flu B	normal
ARF4039	Validation	Mbarara	Possible RF	Initial	no	polyarthralgia	no	no	no	yes	no	no	no	no	Positive	Negative	Negative	Negative	normal
ARF4045	Validation	Mbarara	Possible RF	Initial	no	polyarthralgia	no	no	no	yes	no	no	no	no	Positive	Negative	Negative	Negative	normal
ARF4046	Validation	Mbarara	Possible RF	Initial	no	polyarthralgia	no	no	no	yes	no	yes	no	no	Positive	Negative	Negative	Negative	normal
ARF4049	Validation	Mbarara	Possible RF	Initial	no	polyarthralgia	no	no	no	yes	no	no	no	no	Positive	Negative	Negative	Negative	normal
ARF4050	Validation	Mbarara	Possible RF	Initial	yes	polyarthralgia	no	no	no	yes	no	yes	yes	no	Negative	Negative	Negative	Negative	Rheumatic carditis, moderate mitral regurgitation, mild mitral stenosis
ARF4054	Validation	Mbarara	Possible RF	Initial	no	polyarthritis	no	no	no	yes	no	no	no	no	Positive	Negative	Negative	Negative	normal
ARF4057	Validation	Mbarara	Possible RF	Initial	no	polyarthralgia	no	no	no	yes	no	no	no	no	Negative	Negative	Negative	Negative	normal
ARF4075	Validation	Mbarara	Possible RF	Initial	no	polyarthralgia	no	no	no	yes	no	no	no	no	Positive	Negative	Negative	Negative	normal
ARF4077	Validation	Mbarara	Possible RF	Initial	no	polyarthritis	no	no	no	no	no	no	no	no	Positive	Negative	Negative	Negative	normal
ARF4084	Validation	Mbarara	Possible RF	Initial	no	polyarthralgia	no	no	no	no	no	no	no	no	Positive	Negative	Negative	Negative	normal
ARF4086	Validation	Mbarara	Possible RF	Initial	no	polyarthritis	no	no	no	yes	no	no	no	no	Negative	Negative	Negative	Negative	normal
ARF4090	Validation	Mbarara	Possible RF	Initial	no	none	no	no	no	yes	no	no	no	yes	Positive	Negative	Negative	Negative	normal
ARF4093	Validation	Mbarara	Possible RF	Initial	no	polyarthralgia	no	no	no	yes	no	no	no	yes	Positive	Negative	Negative	Negative	normal
ARF4103	Validation	Mbarara	Possible RF	Initial	no	none	no	no	no	yes	no	no	no	no	Positive	Negative	Negative	Negative	normal
ARF4110	Validation	Mbarara	Possible RF	Initial	no	polyarthralgia	no	no	no	yes	no	no	no	no	Positive	Negative	Negative	Negative	normal
ARF4115	Validation	Mbarara	Possible RF	Initial	no	polyarthralgia	no	no	yes	yes	no	no	no	no	Positive	Negative	Negative	Negative	normal
ARF4116	Validation	Mbarara	Possible RF	Initial	no	polyarthralgia	no	no	no	yes	no	no	no	no	Positive	Negative	Negative	Negative	normal
ARF4117	Validation	Mbarara	Possible RF	Initial	no	polyarthralgia	no	no	no	yes	no	no	no	no	Negative	Negative	Negative	Negative	normal
ARF4142	Validation	Mbarara	Possible RF	Initial	yes	none	no	no	no	yes	no	no	yes	no	Positive	Negative	Negative	Negative	Rheumatic carditis, severe mitral regurgitation
ARF4081	Validation	Mbarara	Unknown alternate diagnosis	n/a	no	polyarthralgia	no	no	no	yes	no	no	yes	no	Negative	Negative	Negative	Negative	normal
ARF4107	Validation	Mbarara	Unknown alternate diagnosis	n/a	no	polyarthralgia	no	no	no	yes	no	no	no	no	Negative	Negative	Negative	Negative	normal
ARF4123	Validation	Mbarara	Unknown alternate diagnosis	n/a	no	polyarthralgia	no	no	no	yes	no	no	yes	no	Negative	Negative	Negative	Negative	normal
ARF4125	Validation	Mbarara	Unknown alternate diagnosis	n/a	no	polyarthralgia	no	no	no	yes	no	no	no	no	Positive	Negative	Negative	Negative	normal
ARF4126	Validation	Mbarara	Unknown alternate diagnosis	n/a	no	polyarthralgia	no	no	no	yes	no	no	no	no	Negative	Negative	Negative	No result	normal
ARF4128	Validation	Mbarara	Unknown alternate diagnosis	n/a	no	polyarthralgia	no	no	no	yes	no	yes	no	no	Positive	Negative	Negative	Negative	normal
ARF4132	Validation	Mbarara	Unknown alternate diagnosis	n/a	no	polyarthralgia	no	no	no	yes	no	no	no	no	Negative	Negative	Negative	Negative	normal
ARF4133	Validation	Mbarara	Unknown alternate diagnosis	n/a	no	polyarthralgia	no	no	no	yes	no	no	no	no	Negative	Negative	Positive	Negative	normal
ARF4135	Validation	Mbarara	Unknown alternate diagnosis	n/a	no	none	no	no	no	yes	no	no	no	no	Negative	Negative	Negative	Negative	normal
ARF4136	Validation	Mbarara	Unknown alternate diagnosis	n/a	no	polyarthralgia	no	no	no	yes	no	no	no	no	Negative	Negative	Negative	Negative	normal
ARF4139	Validation	Mbarara	Unknown alternate diagnosis	n/a	no	polyarthralgia	no	no	no	yes	no	no	no	no	Positive	Negative	Negative	Flu B	normal
ARF4144	Validation	Mbarara	Unknown alternate diagnosis	n/a	no	polyarthralgia	no	no	no	no	no	yes	yes	no	Negative	Negative	Negative	Negative	normal
ARF4146	Validation	Mbarara	Unknown alternate diagnosis	n/a	no	none	no	no	no	yes	no	no	no	no	Negative	Negative	Negative	Negative	normal

## Sheet: Analysis Samples
SubjectID	Cohort	Site	Final Study Diagnosis	Initial or Recurrent ARF?	Proteomics	Metabolomics	RNAseq	Flow cytometry	Epigenomics
ARF2167	Discovery	Mulago	Definite RF	Initial	Included	Included	Included	Included	Included
ARF2166	Discovery	Mulago	Definite RF	Initial	Included	Included	Included	Included	Included
ARF2142	Discovery	Mulago	Definite RF	Initial	Included	Included	Excluded	Included	Included
ARF2134	Discovery	Mulago	Definite RF	Initial	Included	Included	Included	Included	Included
ARF2114	Discovery	Mulago	Definite RF	Initial	Included	Included	Included	Included	Included
ARF2111	Discovery	Mulago	Definite RF	Initial	Included	Included	Included	Included	Included
ARF2084	Discovery	Mulago	Definite RF	Initial	Excluded	Included	Included	Included	Included
ARF2080	Discovery	Mulago	Definite RF	Initial	Included	Included	Included	Included	Included
ARF2071	Discovery	Mulago	Definite RF	Initial	Included	Included	Included	Included	Included
ARF2061	Discovery	Mulago	Definite RF	Initial	Included	Included	Included	Included	Included
ARF2049	Discovery	Mulago	Definite RF	Initial	Included	Included	Included	Included	Included
ARF2076	Discovery	Mulago	Definite RF	Initial	Excluded	Included	Included	Included	Included
ARF2039	Discovery	Mulago	Definite RF	Initial	Included	Included	Included	Included	Included
ARF2034	Discovery	Mulago	Definite RF	Initial	Included	Included	Included	Included	Included
ARF2033	Discovery	Mulago	Definite RF	Initial	Included	Included	Included	Included	Included
ARF2032	Discovery	Mulago	Definite RF	Initial	Included	Included	Excluded	Included	Included
ARF2029	Discovery	Mulago	Definite RF	Initial	Included	Included	Included	Included	Included
ARF2023	Discovery	Mulago	Definite RF	Initial	Included	Included	Included	Included	Included
ARF2016	Discovery	Mulago	Definite RF	Initial	Included	Included	Included	Included	Included
ARF2008	Discovery	Mulago	Definite RF	Initial	Included	Included	Included	Included	Included
ARF2171	Discovery	Mulago	Definite RF	Initial	Excluded	Included	Included	Included	Included
ARF2173	Discovery	Mulago	Definite RF	Initial	Excluded	Included	Included	Included	Included
C001	Discovery	Mulago	Healthy Control	n/a	Included	Included	Included	Included	Included
C004	Discovery	Mulago	Healthy Control	n/a	Included	Included	Included	Included	Included
C008	Discovery	Mulago	Healthy Control	n/a	Included	Included	Included	Included	Included
C022	Discovery	Mulago	Healthy Control	n/a	Included	Included	Included	Included	Included
C029	Discovery	Mulago	Healthy Control	n/a	Included	Included	Included	Included	Included
C031	Discovery	Mulago	Healthy Control	n/a	Included	Included	Included	Included	Included
C032	Discovery	Mulago	Healthy Control	n/a	Included	Included	Included	Included	Included
C038	Discovery	Mulago	Healthy Control	n/a	Included	Included	Included	Included	Included
C041	Discovery	Mulago	Healthy Control	n/a	Included	Included	Included	Included	Included
C043	Discovery	Mulago	Healthy Control	n/a	Included	Included	Included	Included	Included
C045	Discovery	Mulago	Healthy Control	n/a	Included	Included	Included	Included	Included
C046	Discovery	Mulago	Healthy Control	n/a	Included	Included	Included	Included	Included
C048	Discovery	Mulago	Healthy Control	n/a	Included	Included	Included	Included	Excluded
C050	Discovery	Mulago	Healthy Control	n/a	Included	Included	Included	Included	Included
C051	Discovery	Mulago	Healthy Control	n/a	Included	Included	Included	Included	Included
C056	Discovery	Mulago	Healthy Control	n/a	Included	Included	Included	Included	Included
C024	Discovery	Mulago	Known alternate diagnosis	n/a	Included	Included	Included	Included	Included
C026	Discovery	Mulago	Known alternate diagnosis	n/a	Included	Included	Included	Included	Included
C086	Discovery	Mulago	Known alternate diagnosis	n/a	Included	Included	Included	Included	Included
C088	Discovery	Mulago	Known alternate diagnosis	n/a	Included	Included	Included	Included	Included
C091	Discovery	Mulago	Known alternate diagnosis	n/a	Included	Included	Included	Included	Included
C093	Discovery	Mulago	Known alternate diagnosis	n/a	Included	Included	Included	Included	Included
C094	Discovery	Mulago	Known alternate diagnosis	n/a	Included	Included	Included	Included	Included
C096	Discovery	Mulago	Known alternate diagnosis	n/a	Included	Included	Included	Included	Included
C097	Discovery	Mulago	Known alternate diagnosis	n/a	Included	Included	Included	Included	Included
ARF2031	Discovery	Mulago	Possible RF	Initial	Included	Included	Included	Included	Included
ARF2035	Discovery	Mulago	Possible RF	Initial	Included	Included	Included	Included	Included
ARF2038	Discovery	Mulago	Possible RF	Initial	Included	Included	Included	Included	Included
ARF2051	Discovery	Mulago	Possible RF	Initial	Included	Included	Included	Included	Included
ARF2057	Discovery	Mulago	Possible RF	Initial	Included	Included	Included	Included	Included
ARF2062	Discovery	Mulago	Possible RF	Initial	Included	Included	Included	Included	Included
ARF2067	Discovery	Mulago	Possible RF	Initial	Included	Included	Included	Included	Included
ARF2073	Discovery	Mulago	Possible RF	Initial	Included	Included	Excluded	Included	Included
ARF2081	Discovery	Mulago	Possible RF	Initial	Included	Included	Included	Included	Included
ARF2083	Discovery	Mulago	Possible RF	Initial	Included	Included	Included	Included	Included
ARF2090	Discovery	Mulago	Possible RF	Initial	Included	Included	Included	Included	Included
ARF2098	Discovery	Mulago	Possible RF	Initial	Included	Included	Included	Included	Included
ARF2099	Discovery	Mulago	Possible RF	Initial	Included	Included	Included	Included	Included
ARF2105	Discovery	Mulago	Possible RF	Initial	Included	Included	Included	Included	Included
ARF2120	Discovery	Mulago	Possible RF	Initial	Included	Included	Included	Included	Included
ARF2121	Discovery	Mulago	Possible RF	Initial	Included	Included	Included	Included	Included
ARF2133	Discovery	Mulago	Possible RF	Initial	Included	Included	Included	Included	Included
ARF2138	Discovery	Mulago	Possible RF	Initial	Included	Included	Excluded	Included	Included
ARF2139	Discovery	Mulago	Possible RF	Initial	Included	Included	Excluded	Included	Included
ARF2141	Discovery	Mulago	Possible RF	Initial	Excluded	Included	Excluded	Included	Included
ARF2153	Discovery	Mulago	Possible RF	Initial	Included	Included	Included	Included	Included
ARF2155	Discovery	Mulago	Possible RF	Initial	Included	Included	Excluded	Included	Included
ARF2159	Discovery	Mulago	Possible RF	Initial	Included	Included	Included	Included	Included
C060	Discovery	Mulago	RHD (without RF)	n/a	Included	Included	Included	Included	Included
C061	Discovery	Mulago	RHD (without RF)	n/a	Included	Included	Included	Included	Included
C062	Discovery	Mulago	RHD (without RF)	n/a	Included	Included	Included	Included	Included
C066	Discovery	Mulago	RHD (without RF)	n/a	Included	Included	Included	Included	Included
C067	Discovery	Mulago	RHD (without RF)	n/a	Included	Included	Included	Included	Included
C068	Discovery	Mulago	RHD (without RF)	n/a	Included	Included	Included	Included	Included
C071	Discovery	Mulago	RHD (without RF)	n/a	Included	Included	Included	Included	Included
C072	Discovery	Mulago	RHD (without RF)	n/a	Included	Included	Included	Included	Included
C073	Discovery	Mulago	RHD (without RF)	n/a	Included	Included	Included	Included	Included
C074	Discovery	Mulago	RHD (without RF)	n/a	Included	Included	Included	Included	Included
C075	Discovery	Mulago	RHD (without RF)	n/a	Included	Included	Included	Included	Included
C079	Discovery	Mulago	RHD (without RF)	n/a	Included	Included	Included	Included	Included
C080	Discovery	Mulago	RHD (without RF)	n/a	Included	Included	Included	Included	Included
C081	Discovery	Mulago	RHD (without RF)	n/a	Included	Included	Included	Included	Included
C085	Discovery	Mulago	RHD (without RF)	n/a	Included	Included	Included	Included	Included
ARF2036	Discovery	Mulago	Unknown alternate diagnosis	n/a	Included	Included	Included	Included	Included
ARF2046	Discovery	Mulago	Unknown alternate diagnosis	n/a	Included	Included	Included	Included	Included
ARF2058	Discovery	Mulago	Unknown alternate diagnosis	n/a	Included	Included	Included	Included	Included
ARF2059	Discovery	Mulago	Unknown alternate diagnosis	n/a	Included	Included	Included	Included	Included
ARF2060	Discovery	Mulago	Unknown alternate diagnosis	n/a	Included	Included	Included	Included	Included
ARF2069	Discovery	Mulago	Unknown alternate diagnosis	n/a	Included	Included	Included	Included	Included
ARF2070	Discovery	Mulago	Unknown alternate diagnosis	n/a	Included	Included	Included	Included	Included
ARF2106	Discovery	Mulago	Unknown alternate diagnosis	n/a	Included	Included	Included	Included	Included
ARF2152	Discovery	Mulago	Unknown alternate diagnosis	n/a	Included	Included	Excluded	Included	Included
ARF2154	Discovery	Mulago	Unknown alternate diagnosis	n/a	Included	Included	Excluded	Included	Included
ARF2168	Discovery	Mulago	Unknown alternate diagnosis	n/a	Excluded	Included	Included	Included	Included
ARF2169	Discovery	Mulago	Unknown alternate diagnosis	n/a	Included	Included	Included	Included	Included
ARF2170	Discovery	Mulago	Unknown alternate diagnosis	n/a	Included	Included	Included	Included	Included
ARF2172	Discovery	Mulago	Unknown alternate diagnosis	n/a	Included	Included	Included	Included	Included
ARF2174	Discovery	Mulago	Unknown alternate diagnosis	n/a	Excluded	Included	Included	Included	Included
ARF4001	Validation	Mbarara	Definite RF	Initial	Included	Included	Included	Included	Included
ARF4004	Validation	Mbarara	Definite RF	Initial	Included	Included	Included	Included	Included
ARF4012	Validation	Mbarara	Definite RF	Initial	Included	Included	Included	Included	Included
ARF4016	Validation	Mbarara	Definite RF	Initial	Included	Included	Included	Included	Included
ARF4018	Validation	Mbarara	Definite RF	Initial	Included	Included	Included	Included	Included
ARF4021	Validation	Mbarara	Definite RF	Initial	Included	Included	Included	Included	Included
ARF4026	Validation	Mbarara	Definite RF	Initial	Included	Included	Included	Included	Included
ARF4034	Validation	Mbarara	Definite RF	Initial	Excluded	Included	Included	Included	Included
ARF4056	Validation	Mbarara	Definite RF	Initial	Included	Included	Included	Included	Included
ARF4058	Validation	Mbarara	Definite RF	Initial	Included	Included	Included	Included	Included
ARF4065	Validation	Mbarara	Definite RF	Initial	Included	Included	Included	Included	Included
ARF4069	Validation	Mbarara	Definite RF	Initial	Included	Included	Included	Included	Included
ARF4070	Validation	Mbarara	Definite RF	Initial	Included	Included	Included	Included	Included
ARF4092	Validation	Mbarara	Definite RF	Initial	Included	Included	Included	Included	Included
ARF4098	Validation	Mbarara	Definite RF	Initial	Excluded	Included	Included	Included	Included
ARF4100	Validation	Mbarara	Definite RF	Initial	Included	Included	Included	Included	Included
ARF4105	Validation	Mbarara	Definite RF	Initial	Included	Included	Included	Included	Included
ARF4109	Validation	Mbarara	Definite RF	Initial	Included	Included	Included	Included	Included
ARF4112	Validation	Mbarara	Definite RF	Initial	Included	Included	Included	Included	Included
ARF4124	Validation	Mbarara	Definite RF	Initial	Included	Included	Included	Included	Included
ARF4127	Validation	Mbarara	Definite RF	Initial	Included	Included	Included	Included	Included
ARF4129	Validation	Mbarara	Definite RF	Initial	Included	Included	Included	Included	Included
ARF4134	Validation	Mbarara	Definite RF	Initial	Included	Included	Included	Included	Excluded
ARF4137	Validation	Mbarara	Definite RF	Initial	Included	Included	Included	Included	Included
ARF4140	Validation	Mbarara	Definite RF	Initial	Included	Included	Included	Included	Included
ARF4141	Validation	Mbarara	Definite RF	Initial	Included	Included	Included	Included	Included
ARF4143	Validation	Mbarara	Definite RF	Initial	Included	Included	Included	Included	Included
ARF4145	Validation	Mbarara	Definite RF	Initial	Included	Included	Included	Included	Included
ARF4010	Validation	Mbarara	Possible RF	Initial	Included	Included	Included	Included	Included
ARF4014	Validation	Mbarara	Possible RF	Initial	Included	Included	Included	Included	Included
ARF4032	Validation	Mbarara	Possible RF	Initial	Included	Included	Included	Included	Included
ARF4038	Validation	Mbarara	Possible RF	Initial	Included	Included	Included	Included	Included
ARF4039	Validation	Mbarara	Possible RF	Initial	Excluded	Included	Included	Included	Included
ARF4045	Validation	Mbarara	Possible RF	Initial	Included	Included	Included	Included	Included
ARF4046	Validation	Mbarara	Possible RF	Initial	Included	Included	Included	Included	Included
ARF4049	Validation	Mbarara	Possible RF	Initial	Included	Included	Included	Included	Included
ARF4050	Validation	Mbarara	Possible RF	Initial	Excluded	Included	Included	Included	Included
ARF4054	Validation	Mbarara	Possible RF	Initial	Included	Included	Included	Included	Included
ARF4057	Validation	Mbarara	Possible RF	Initial	Included	Included	Included	Included	Included
ARF4075	Validation	Mbarara	Possible RF	Initial	Included	Included	Included	Included	Included
ARF4077	Validation	Mbarara	Possible RF	Initial	Included	Included	Included	Included	Included
ARF4084	Validation	Mbarara	Possible RF	Initial	Included	Included	Included	Included	Included
ARF4086	Validation	Mbarara	Possible RF	Initial	Included	Included	Included	Included	Included
ARF4090	Validation	Mbarara	Possible RF	Initial	Included	Included	Included	Included	Included
ARF4093	Validation	Mbarara	Possible RF	Initial	Included	Included	Included	Included	Included
ARF4103	Validation	Mbarara	Possible RF	Initial	Included	Included	Included	Included	Included
ARF4110	Validation	Mbarara	Possible RF	Initial	Included	Included	Included	Included	Included
ARF4115	Validation	Mbarara	Possible RF	Initial	Included	Included	Included	Included	Included
ARF4116	Validation	Mbarara	Possible RF	Initial	Included	Included	Included	Included	Included
ARF4117	Validation	Mbarara	Possible RF	Initial	Included	Included	Included	Included	Included
ARF4142	Validation	Mbarara	Possible RF	Initial	Included	Included	Included	Included	Included
ARF4081	Validation	Mbarara	Unknown alternate diagnosis	n/a	Included	Included	Included	Included	Included
ARF4107	Validation	Mbarara	Unknown alternate diagnosis	n/a	Included	Included	Included	Included	Included
ARF4123	Validation	Mbarara	Unknown alternate diagnosis	n/a	Included	Included	Included	Included	Included
ARF4125	Validation	Mbarara	Unknown alternate diagnosis	n/a	Included	Included	Included	Included	Included
ARF4126	Validation	Mbarara	Unknown alternate diagnosis	n/a	Included	Included	Included	Included	Included
ARF4128	Validation	Mbarara	Unknown alternate diagnosis	n/a	Included	Included	Included	Included	Included
ARF4132	Validation	Mbarara	Unknown alternate diagnosis	n/a	Included	Included	Included	Included	Included
ARF4133	Validation	Mbarara	Unknown alternate diagnosis	n/a	Included	Included	Included	Included	Included
ARF4135	Validation	Mbarara	Unknown alternate diagnosis	n/a	Included	Included	Included	Included	Included
ARF4136	Validation	Mbarara	Unknown alternate diagnosis	n/a	Included	Included	Included	Included	Included
ARF4139	Validation	Mbarara	Unknown alternate diagnosis	n/a	Included	Included	Included	Included	Included
ARF4144	Validation	Mbarara	Unknown alternate diagnosis	n/a	Included	Included	Included	Included	Included
ARF4146	Validation	Mbarara	Unknown alternate diagnosis	n/a	Included	Included	Included	Included	Included

## Sheet: Metab ARFvHealthy
Name	pARF	pAge	pMale	BetaARF	FoldARF	qARF	SUPER_PATHWAY	SUB_PATHWAY	INCHIKEY	SMILES	CAS	CHEMSPIDER	HMDB	KEGG	PUBCHEM
N-acetylglycine	0.00322582	0.0395017	0.00237974	-0.389012	0.692886	0.0147055	Amino Acid	Glycine, Serine and Threonine Metabolism	OKJIRPAQVSHGFK-UHFFFAOYSA-N	O=C(O)C(NC(C)=O)[H]	543-24-8	10507	HMDB0000532		10972
threonine	0.00563421	0.000677721	0.891872	-0.353793	0.787636	0.0208687	Amino Acid	Glycine, Serine and Threonine Metabolism	AYFVYJQAPQTCCC-GBXIJSLDSA-N	N[C@H](C(O)=O)[C@H](O)C	72-19-5	6051	HMDB0000167	C00188	6288
glutamine	0.00040122	0.343838	0.0122826	-0.439488	0.836302	0.00509515	Amino Acid	Glutamate Metabolism	ZDXPYRJPNDTMRX-VKHMYHEASA-N	OC([C@@H](N)CCC(N)=O)=O	56-85-9	5746	HMDB0000641	C00064	5961
S-1-pyrroline-5-carboxylate	0.0025494	0.891349	0.0538822	0.374841	1.31978	0.0127677	Amino Acid	Glutamate Metabolism	DWAKNKKXGALPNW-UHFFFAOYSA-N	OC(C1CCC=N1)=O	2906-39-0	10140206	HMDB0001301	C04322	11966181
histidine	6.11173e-05	0.1834	0.31471	-0.481241	0.772202	0.00144879	Amino Acid	Histidine Metabolism	HNDVDQJCIGZPNO-UHFFFAOYSA-N	NC(C(O)=O)CC1=CN=CN1	5934-29-2	752	HMDB0000177	C00135	6274
hydantoin-5-propionate	3.3652e-05	0.210873	0.858887	0.626409	2.63128	0.00119659	Amino Acid	Histidine Metabolism	VWFWNXQAMGDPGG-UHFFFAOYSA-N	O=C1NC(C(CCC(O)=O)N1)=O	5624-26-0	761	HMDB0001212	C05565	782
1-methyl-5-imidazolelactate	0.00576001	0.00999907	0.783328	0.361213	1.83908	0.0208992	Amino Acid	Histidine Metabolism	MXETUSMIYKMMAT-UHFFFAOYSA-N	CN1C=NC=C1CC(O)C(O)=O	2022510-60-5	65563369
N6-acetyllysine	0.000111705	0.548048	0.230326	0.509882	1.20396	0.00209051	Amino Acid	Lysine Metabolism	DTERQYGMUDWYAZ-ZETCQYMHSA-N	N[C@@H](CCCCNC(C)=O)C(O)=O	692-04-6	83801	HMDB0000206	C02727	92832
phenylalanine	0.000156688	0.163321	0.70203	0.536682	1.26695	0.00253247	Amino Acid	Phenylalanine Metabolism	COLNVLDHVKWLRT-UHFFFAOYSA-N	NC(C(O)=O)CC1=CC=CC=C1	63-91-2	5910	HMDB0000159	C00079	6140
N-acetylphenylalanine	1.5179e-05	0.0513963	0.16865	0.572511	1.71636	0.0010371	Amino Acid	Phenylalanine Metabolism	CBQJSKKFNMDLON-JTQLQIEISA-N	O=C(O)[C@@H](NC(C)=O)CC1=CC=CC=C1	2018-61-3	67404	HMDB0000512	C03519	74839
phenyllactate (PLA)	0.000142364	0.174742	0.466407	0.539351	1.59834	0.00241054	Amino Acid	Phenylalanine Metabolism	VOXXWSYKYCBWHO-UHFFFAOYSA-N	OC(C(O)=O)CC1=CC=CC=C1	828-01-3	3715	HMDB0000779,HMDB0000563	C05607	3848
N-acetyltyrosine	0.0066727	0.0121988	0.262589	0.392257	1.43312	0.0225967	Amino Acid	Tyrosine Metabolism	CAHKINHBCWCHCF-JTQLQIEISA-N	OC1=CC=C(C[C@@H](C(O)=O)NC(C)=O)C=C1	537-55-3	61606	HMDB0000866		68310
picolinate	0.00509776	0.330403	0.137865	0.455477	1.9893	0.0190804	Amino Acid	Tryptophan Metabolism	SIOXPEMLGUPBBT-UHFFFAOYSA-N	O=C(O)C1=NC=CC=C1	98-98-6	993	HMDB0002243	C10164	1018
serotonin	0.0027377	0.347643	0.871007	-0.41393	0.367199	0.0131746	Amino Acid	Tryptophan Metabolism	QZAYGJVTTNCVMB-UHFFFAOYSA-N	NCCC1=CNC(C=C2)=C1C=C2O	153-98-0	5013	HMDB0000259	C00780	5202
indolepropionate	0.00182763	0.0881763	0.591386	-0.424684	0.326486	0.0110242	Amino Acid	Tryptophan Metabolism	GOLXRNDWAUTYKT-UHFFFAOYSA-N	OC(CCC1=CNC2=C1C=CC=C2)=O	830-96-6	3613	HMDB0002302		3744
6-bromotryptophan	0.00101532	0.336737	0.873353	-0.456791	0.635489	0.00816717	Amino Acid	Tryptophan Metabolism	OAORYCZPERQARS-UHFFFAOYSA-N	Brc1ccc2c(CC(N)C(O)=O)c[nH]c2c1					9856996
isovalerylglycine	0.00406947	0.0237337	0.778438	0.463485	1.72583	0.0168256	Amino Acid	Leucine, Isoleucine and Valine Metabolism	ZRQXMKMBBMNNQC-UHFFFAOYSA-N	O=C(O)CNC(CC(C)C)=O	16284-60-9	475516	HMDB00678		546304
beta-hydroxyisovalerate	4.98204e-06	0.120531	0.558151	0.625392	2.15224	0.000590498	Amino Acid	Leucine, Isoleucine and Valine Metabolism	AXFYFNCPONWUHW-UHFFFAOYSA-N	CC(C)(O)CC(O)=O	625-08-1	62571	HMDB0000754		69362
2-hydroxy-3-methylvalerate	0.00143756	0.512702	0.24172	0.449448	1.57046	0.00999564	Amino Acid	Leucine, Isoleucine and Valine Metabolism	RILPIWOPNGRASR-UHFFFAOYSA-N	O=C(C(C(CC)C)O)O	488-15-3	144317	HMDB0000317		164623
methylsuccinate	0.00150552	0.308633	0.211116	-0.405908	0.726132	0.00999564	Amino Acid	Leucine, Isoleucine and Valine Metabolism	WXUAQHNMJWJLTG-UHFFFAOYSA-N	CC(C(O)=O)CC(O)=O	498-21-5	9922	HMDB0001844		10349
N-acetylvaline	0.00469316	0.508614	0.154082	0.367795	1.15981	0.0180037	Amino Acid	Leucine, Isoleucine and Valine Metabolism	IHYJTAOFMMMOPX-LURJTMIESA-N	O=C(O)[C@@H](NC(C)=O)C(C)C	96-81-1	60154	HMDB0011757		66789
alpha-hydroxyisovalerate	0.000563514	0.945644	0.740578	0.475753	1.50467	0.00607188	Amino Acid	Leucine, Isoleucine and Valine Metabolism	NGEWQZIDQIYUNV-UHFFFAOYSA-N	OC(C(O)=O)C(C)C	600-37-3	90190	HMDB0000407		99823
methionine sulfoxide	0.00665493	0.0289636	0.978211	0.400423	1.30039	0.0225967	Amino Acid	Methionine, Cysteine, SAM and Taurine Metabolism	QEFRNWWLZKMPFJ-YGVKFDHGSA-N	O=C(O)[C@@H](N)CCS(C)=O	3226-65-1	139840	HMDB0002005	C02989	158980
2-hydroxy-4-(methylthio)butanoic acid	5.52788e-05	0.358077	0.720472	0.556264	1.66881	0.00140399	Amino Acid	Methionine, Cysteine, SAM and Taurine Metabolism	ONFOSYPQQXJWGS-UHFFFAOYSA-N	CSCCC(O)C(O)=O	583-91-5		HMDB0037115		11427
S-carboxyethylcysteine	0.00241756	0.0137559	0.0139715	0.410569	1.43091	0.012434	Amino Acid	Methionine, Cysteine, SAM and Taurine Metabolism	CAMXXPUSAROUCX-BYPYZUCNSA-N	SC[C@@H](C(O)=O)NCCC(O)=O	4033-46-9	19955529
hypotaurine	0.00343653	0.337019	0.0696937	-0.344397	0.671997	0.0152743	Amino Acid	Methionine, Cysteine, SAM and Taurine Metabolism	VVIUBCNYACGLLV-UHFFFAOYSA-N	NCCS(O)=O	300-84-5	96959	HMDB0000965	C00519	107812
homoarginine	0.000466762	0.0413247	0.801952	-0.475834	0.609938	0.00554795	Amino Acid	Urea cycle; Arginine and Proline Metabolism	QUOGESRFPZDMMT-YFKPBYRVSA-N	N[C@H](C(O)=O)CCCCNC(N)=N	156-86-5	8732	HMDB0000670	C01924	9085
hydroxyproline	0.000363654	0.447684	0.119553	-0.391308	0.726706	0.00478914	Amino Acid	Urea cycle; Arginine and Proline Metabolism	PMMYEEVYMWASQN-DMTCNVIQSA-N	O[C@@H]1C[C@@H](C(O)=O)NC1	51-35-4	5605	HMDB0000725	C01157	5810
guanidinoacetate	0.00383356	0.0112828	0.807296	-0.339318	0.724413	0.0162276	Amino Acid	Creatine Metabolism	BPMFZUMJYQTVII-UHFFFAOYSA-N	NC(NCC(O)=O)=N	352-97-6	743	HMDB0000128	C00581	763
(N(1) + N(8))-acetylspermidine	4.62909e-05	0.672505	0.00510534	0.551506	1.74482	0.00137166	Amino Acid	Polyamine Metabolism	MQTAVJHICJWXBR-UHFFFAOYSA-N	CC(NCCCNCCCCN)=O			HMDB0002189,HMDB0001276	C01029,C00612	496123689
5-methylthioadenosine (MTA)	0.00281591	0.894875	0.325843	0.385829	1.23757	0.0131746	Amino Acid	Polyamine Metabolism	WUUGFSXJNOTRMR-IOSLPCCCSA-N	NC1=NC=NC2=C1N=CN2[C@H]3[C@H](O)[C@H](O)[C@@H](CSC)O3	2457-80-9	388321	HMDB0001173	C00170	439176
gamma-glutamylglutamine	0.000289722	0.408393	0.0649	-0.495338	0.759464	0.00412073	Peptide	Gamma-glutamyl Amino Acid	JBFYFLXEJFQWMU-WDSKDSINSA-N	O=C(N)CC[C@@H](C(O)=O)NC(CC[C@@H](C(O)=O)N)=O	10148-81-9	133013	HMDB0011738	C05283	150914
gamma-glutamylhistidine	5.38684e-05	0.330157	0.50645	-0.536908	0.656253	0.00140399	Peptide	Gamma-glutamyl Amino Acid	PXVCMZCJAUJLJP-YUMQZZPRSA-N	O=C(O)[C@@H](N)CCC(N[C@@H](CC1=CNC=N1)C(O)=O)=O	37460-15-4	5380197	HMDB0029151		7017195
gamma-glutamylphenylalanine	0.00614264	0.078521	0.289465	0.414544	1.3264	0.0214135	Peptide	Gamma-glutamyl Amino Acid	XHHOHZPNYFQJKL-QWRGUYRKSA-N	O=C(O)[C@H](CC1=CC=CC=C1)NC(CC[C@@H](C(O)=O)N)=O	7432-24-8	99868	HMDB0000594		111299
glycylvaline	0.00661564	0.701332	0.262088	0.375288	2.29357	0.0225967	Peptide	Dipeptide	STKYPAFSDFAEPH-LURJTMIESA-N	CC(C)[C@@H](C(O)=O)NC(CN)=O	1963-21-9	2006926	HMDB0028854		2724807
glucuronate	0.00207982	0.956729	0.906383	0.353401	1.48145	0.0117387	Carbohydrate	Aminosugar Metabolism	AEMOLEFTQBMNLQ-QIUUJYRFSA-N	O[C@@H]1O[C@H]([C@](O)=O)[C@@H](O)[C@H](O)[C@H]1O	207300-70-7	58552	HMDB0000127	C16245
citrate	1.53597e-06	0.82055	0.00548867	-0.60261	0.58318	0.000273077	Energy	TCA Cycle	KRKNYBCHXYNGOX-UHFFFAOYSA-N	OC(CC(CC(O)=O)(O)C(O)=O)=O	77-92-9	305	HMDB0000094	C00158	311
aconitate [cis or trans]	3.92206e-08	0.357529	0.133684	-0.664317	0.641487	1.39459e-05	Energy	TCA Cycle					HMDB0000958,HMDB000072	C004174,C02341
2-methylcitrate/homocitrate	0.00130371	0.0743784	0.851557	0.335411	1.3173	0.00986313	Energy	TCA Cycle	YNOXCRMFGMSKIJ-UHFFFAOYSA-N	CC(C(O)=O)C(C(O)=O)(O)CC(O)=O			HMDB0003518,HMDB0000379	C01251	439459515
10-undecenoate (11:1n1)	0.00084849	0.0424429	0.0398919	-0.460075	0.454335	0.00747423	Lipid	Medium Chain Fatty Acid	FRPZMMHWLSIFAZ-UHFFFAOYSA-N	O=C(CCCCCCCCC=C)O[H]	1333-28-4	10771160	HMDB0033724	C13910	14891
margarate (17:0)	0.00601488	0.0331735	0.184444	-0.414547	0.539728	0.0213875	Lipid	Long Chain Saturated Fatty Acid	KEMQGTRYUADPNZ-UHFFFAOYSA-N	O=C(O)CCCCCCCCCCCCCCCC	506-12-7	10033	HMDB0002259		10465
docosapentaenoate (DPA; 22:5n3)	0.00258735	0.016991	0.199785	-0.429364	0.474805	0.0127777	Lipid	Long Chain Polyunsaturated Fatty Acid (n3 and n6)	YUFFSWGQGVEMMI-JLNKQSITSA-N	O=C(O)CCCCC/C=C\C/C=C\C/C=C\C/C=C\C/C=C\CC	2234-74-4		HMDB0006528,HMDB0001976	C16513	6441454
docosahexaenoate (DHA; 22:6n3)	0.00154524	0.0364298	0.157744	-0.450676	0.472424	0.00999564	Lipid	Long Chain Polyunsaturated Fatty Acid (n3 and n6)	MBMBGCFOFBJSGT-KUBAVDMBSA-N	CC\C=C/C\C=C/C\C=C/C/C=C\C/C=C\C/C=C\CCC(O)=O	6217-54-5	393183	HMDB0002183	C06429	445580
hexadecadienoate (16:2n6)	0.00359296	0.0190719	0.140847	-0.421182	0.429592	0.0155801	Lipid	Long Chain Polyunsaturated Fatty Acid (n3 and n6)	WPJGPAAPSBVXNU-HZJYTTRNSA-N	CCCCC/C=C\C/C=C\CCCCCC(O)=O	28290-73-5	13628094	HMDB0000477		13932172
dihomolinoleate (20:2n6)	0.00415532	0.0075427	0.115985	-0.402777	0.510504	0.0169831	Lipid	Long Chain Polyunsaturated Fatty Acid (n3 and n6)	XSXIVVZCUAHUJO-HZJYTTRNSA-N	O=C(O)CCCCCCCCC/C=C\C/C=C\CCCCC	2091-39-6	4944228	HMDB0005060	C16525	6439848
dodecenedioate (C12:1-DC)*	0.000794754	0.0117554	0.264546	-0.436233	0.550248	0.00724604	Lipid	Fatty Acid, Dicarboxylate	OHCMUMNQAHNIEP-HNQUOIGGSA-N	OC(CCC/C=C/CCCCCC(O)=O)=O			HMDB0000933		5283028
dodecadienoate (12:2)*	0.000777473	0.0483566	0.344648	-0.495357	0.363671	0.00724604	Lipid	Fatty Acid, Dicarboxylate	QHRHXXRXWDTFLI-HZJYTTRNSA-N	CCCCC/C=C\C/C=C\CC(O)=O					25480
tetradecadienedioate (C14:2-DC)*	0.000221143	0.0648025	0.00870107	-0.571062	0.395577	0.00341884	Lipid	Fatty Acid, Dicarboxylate	MUFSRLVOUKHPIZ-OVYZBVKCSA-N	O=C(O)CCC/C=C\C/C=C\CCCCC(O)=O					86018718
hydroxy-CMPF*	0.00227449	0.951843	0.389725	-0.445066	0.378536	0.0121181	Lipid	Fatty Acid, Dicarboxylate	OZOJARPUDFLESM-UHFFFAOYSA-N	CCC(O)C1=C(C)C(C(O)=O)=C(CCC(O)=O)O1
3-hydroxybutyroylglycine**	0.00460356	0.0331393	0.0720394	-0.424787	0.449152	0.0180037	Lipid	Fatty Acid Metabolism (Acyl Glycine)	VMIWHQCIHIUYCS-UHFFFAOYSA-N	O=C(CC(O)C)NCC(O)=O
dihomo-linoleoylcarnitine (C20:2)*	0.00183054	0.974974	0.67047	-0.441994	0.538548	0.0110242	Lipid	Fatty Acid Metabolism (Acyl Carnitine, Polyunsaturated)	OLZWDVKTOGTVLC-UTJQPWESSA-N	O=C(CCCCCCCCC/C=C\C/C=C\CCCCC)OC(C[N+](C)(C)C)CC([O-])=O
3-hydroxyoctanoylcarnitine (1)	0.00470883	0.285641	0.132502	-0.392651	0.442471	0.0180037	Lipid	Fatty Acid Metabolism (Acyl Carnitine, Hydroxy)	RCXSFDNDEVSQNG-UHFFFAOYSA-N	[O-]C(CC(OC(C(O)CCCCCC)=O)C[N+](C)(C)C)=O
3-hydroxyoctanoylcarnitine (2)	0.00610884	0.361026	0.100096	-0.410509	0.499174	0.0214135	Lipid	Fatty Acid Metabolism (Acyl Carnitine, Hydroxy)	RCXSFDNDEVSQNG-UHFFFAOYSA-N	[O-]C(CC(OC(C(O)CCCCCC)=O)C[N+](C)(C)C)=O
3-hydroxydecanoylcarnitine	0.00162796	0.270854	0.181107	-0.450642	0.3799	0.0103368	Lipid	Fatty Acid Metabolism (Acyl Carnitine, Hydroxy)	VCRSQDIROUELAR-UHFFFAOYSA-N	OC(CCCCCCC)CC(OC(CC([O-])=O)C[N+](C)(C)C)=O		59664325	HMDB0061636		121454166
2-hydroxylaurate	0.0024239	0.625485	0.0618086	-0.461718	0.636803	0.012434	Lipid	Fatty Acid, Monohydroxy	YDZIJQXINJLRLL-UHFFFAOYSA-N	OC(C(O)CCCCCCCCCC)=O	2984-55-6	88259			97783
3,4-dihydroxybutyrate	0.000670166	0.419265	0.149224	0.433213	1.46771	0.00680843	Lipid	Fatty Acid, Dihydroxy	DZAIOXUZHHTJKN-UHFFFAOYSA-N	O=C(CC(CO)O)O	51267-44-8		HMDB0000337		150929
12-HETE	0.00167674	0.9795	0.581882	0.369098	1.87342	0.0104598	Lipid	Eicosanoid	ZNHVWPKMFKADKW-VXBMJZGYSA-N	OC(CCC/C=C\C\C=C/C=C/C(C/C=C\CCCCC)O)=O	73837-14-6,71030-37-0	21509475	HMDB0006111	C14777	5283155
glycerophosphoinositol*	0.00200131	0.690646	0.9413	0.426507	1.56082	0.0114777	Lipid	Phospholipid Metabolism	BMVUIWJCUQSHLZ-GFSNQTMESA-N	[H]C(C(O)(C(O)([C@](O)1[H])[H])[H])([C@@](OP(O)(OC[C@@]([H])(CO)O)=O)([C@]1(O)[H])[H])O	16824-65-0				167572
1-palmitoyl-2-palmitoleoyl-GPC (16:0/16:1)*	0.0010336	0.574857	0.565853	0.472628	1.5414	0.00816717	Lipid	Phosphatidylcholine (PC)	QIBZFHLFHCIUOT-HTXNQAPBSA-N	CCCCCCCCCCCCCCCC(OCC(OC(CCCCCCC/C=C/CCCCCC)=O)COP([O-])(OCC[N+](C)(C)C)=O)=O			HMDB0007969		6443788
1-stearoyl-2-linoleoyl-GPC (18:0/18:2)*	0.000942746	0.37611	0.414689	-0.487203	0.847796	0.00779576	Lipid	Phosphatidylcholine (PC)	FORFDCPQKJHEBF-JEFUZMEDSA-N	CCCCCCCCCCCCCCCCCC(OCC(OC(CCCCCCC/C=C/C/C=C/CCCCC)=O)COP([O-])(OCC[N+](C)(C)C)=O)=O			HMDB0008039		6441487
1-oleoyl-2-docosahexaenoyl-GPC (18:1/22:6)*	0.00186023	0.411791	0.133782	-0.405073	0.778526	0.0110242	Lipid	Phosphatidylcholine (PC)	FPEVDFOXMCHLKL-KFDYCXSYSA-N	O=C(CCCCCCC/C=C\CCCCCCCC)OC[C@]([H])(COP(OCC[N+](C)(C)C)([O-])=O)OC(CC/C=C\C/C=C\C/C=C\C/C=C\C/C=C\C/C=C\CC)=O		24766785	HMDB0008123		24778955
1-linoleoyl-2-arachidonoyl-GPC (18:2/20:4n6)*	0.00154611	0.944825	0.201362	-0.475997	0.656044	0.00999564	Lipid	Phosphatidylcholine (PC)	ZZSZQATYGVHNLZ-PUMLCSCDSA-N	O=C(CCCCCCC/C=C\C/C=C\CCCCC)OC[C@]([H])(COP(OCC[N+](C)(C)C)([O-])=O)OC(CCC/C=C\C/C=C\C/C=C\C/C=C\CCCCC)=O		24766809	HMDB0008147	C05208	24778979
1,2-dipalmitoyl-GPE (16:0/16:0)*	0.000793546	0.441836	0.00267074	0.550153	1.75595	0.00724604	Lipid	Phosphatidylethanolamine (PE)	SLKDGVPOSSLUAI-PGUFJCEWSA-N	O=C(CCCCCCCCCCCCCCC)OC[C@]([H])(COP(OCCN)(O)=O)OC(CCCCCCCCCCCCCCC)=O		393103	HMDB0008923		445468
1-palmitoyl-2-oleoyl-GPE (16:0/18:1)	0.000100024	0.414374	0.255834	0.565008	1.85457	0.00197589	Lipid	Phosphatidylethanolamine (PE)	FHQVHHIBKUMWTI-OTMQOFQLSA-N	CCCCCCCC\C=C/CCCCCCCC(O[C@](COC(CCCCCCCCCCCCCCC)=O)(COP([O-])(OCC[N+]([H])([H])[H])=O)[H])=O	26662-94-2	4446615	HMDB0005320		5283496
1-palmitoyl-2-linoleoyl-GPE (16:0/18:2)	0.000881601	0.157644	0.0749868	0.481532	1.73142	0.00747423	Lipid	Phosphatidylethanolamine (PE)	HBZNVZIRJWODIB-NHCUFCNUSA-N	O=C(CCCCCCC/C=C\C/C=C\CCCCC)O[C@@H](COP(OCCN)(O)=O)COC(CCCCCCCCCCCCCCC)=O		7825697	HMDB0005322		9546747
1-palmitoyl-2-arachidonoyl-GPE (16:0/20:4)*	0.000525253	0.618519	0.0758027	0.500577	1.48855	0.00583648	Lipid	Phosphatidylethanolamine (PE)	DRIVXEVMDWCWLI-CAQMIEAISA-N	O=C(CCCCCCCCCCCCCCC)OC[C@]([H])(COP(OCCN)(O)=O)OC(CCC/C=C\C/C=C\C/C=C\C/C=C\CCCCC)=O		7825750	HMDB0005323	C05210	9546800
1-stearoyl-2-oleoyl-GPE (18:0/18:1)	0.000792965	0.388924	0.324238	0.485913	1.66843	0.00724604	Lipid	Phosphatidylethanolamine (PE)	JQKOHRZNEOQNJE-AYBNWLFXSA-N	O=C(CCCCCCC/C=C/CCCCCCCC)O[C@@H](COP(OCCN)(O)=O)COC(CCCCCCCCCCCCCCCCC)=O			HMDB0008993		9546742
1-stearoyl-2-linoleoyl-GPE (18:0/18:2)*	0.00217401	0.191267	0.117791	0.44749	1.52093	0.0118927	Lipid	Phosphatidylethanolamine (PE)	YDTWOEYVDRKKCR-KNERPIHHSA-N	O=C(CCCCCCCCCCCCCCCCC)OC[C@]([H])(COP(OCCN)(O)=O)OC(CCCCCCC/C=C\C/C=C\CCCCC)=O		7825699	HMDB0008994		9546749
1-stearoyl-2-arachidonoyl-GPS (18:0/20:4)	0.00466413	0.585241	0.0591781	-0.442597	0.407089	0.0180037	Lipid	Phosphatidylserine (PS)	SVOUGFFDROZBJI-DNALCEECSA-N	O=C(CCCCCCCCCCCCCCCCC)OC[C@]([H])(COP(O)(OC[C@]([NH3+])(C([O-])=O)[H])=O)OC(CCC/C=C\C/C=C\C/C=C\C/C=C\CCCCC)=O			HMDB0012383		24779545
1-stearoyl-2-arachidonoyl-GPI (18:0/20:4)	0.00571849	0.214611	0.538224	-0.415969	0.79986	0.0208992	Lipid	Phosphatidylinositol (PI)	KRTOMQDUKGRFDJ-YKOKTLGVSA-N	CCCCCCCCCCCCCCCCCC(OC[C@]([H])(COP(O)(O[C@](C(O)(C(O)(C(O)([C@](O)1[H])[H])[H])[H])([C@]1(O)[H])[H])=O)OC(CCC/C=C\C/C=C\C/C=C\C/C=C\CCCCC)=O)=O	383907-33-3	21403055	HMDB0009815
1-linoleoyl-GPA (18:2)*	3.12373e-05	0.248613	0.930546	-0.56252	0.441972	0.00119659	Lipid	Lysophospholipid	ZQTAMPRZFOOEEP-KKFOGOCZSA-N	O=C(CCCCCCC/C=C\C/C=C\CCCCC)OC[C@]([H])(COP(O)(O)=O)O		24766514	HMDB0007856
1-lignoceroyl-GPC (24:0)	1.47581e-05	0.872733	0.699778	-0.581266	0.579532	0.0010371	Lipid	Lysophospholipid	SKJMUADLQLZAGH-WJOKGBTCSA-N	CCCCCCCCCCCCCCCCCCCCCCCC(OC[C@H](COP([O-])(OCC[N+](C)(C)C)=O)O)=O	325171-59-3	24766539	HMDB0010405		24779481
2-stearoyl-GPE (18:0)*	0.00151328	0.406231	0.837908	0.465383	2.06773	0.00999564	Lipid	Lysophospholipid	KIHAGWUUUHJRMS-JOCHJYFZSA-N	OC[C@@H](OC(CCCCCCCCCCCCCCCCC)=O)COP(OCC[NH3+])([O-])=O		24769218	HMDB0011129
1-(1-enyl-palmitoyl)-2-arachidonoyl-GPC (P-16:0/20:4)*	3.96437e-05	0.110249	0.187666	-0.575195	0.752945	0.00128149	Lipid	Plasmalogen	IOYKZPNDXIIXLN-LOQSCQKMSA-N	[H][C@](OC(CCC/C=C\C/C=C\C/C=C\C/C=C\CCCCC)=O)(COP(OCC[N+](C)(C)C)([O-])=O)CO/C=C\CCCCCCCCCCCCCC		24767495	HMDB0011220
1-(1-enyl-palmitoyl)-2-linoleoyl-GPC (P-16:0/18:2)*	7.70385e-05	0.872309	0.216044	-0.555175	0.694352	0.00161136	Lipid	Plasmalogen	QLEHHUPUHJPURI-PWYDUFMYSA-N	[H][C@](OC(CCCCCCC/C=C\C/C=C\CCCCC)=O)(COP(OCC[N+](C)(C)C)([O-])=O)CO/C=C\CCCCCCCCCCCCCC		24767486	HMDB0011211		24779386
1-(1-enyl-palmitoyl)-GPC (P-16:0)*	0.00278846	0.0572043	0.364556	-0.349684	0.752352	0.0131746	Lipid	Lysoplasmalogen	HTZINLFNXLXRBC-CQLBIITFSA-N	CCCCCCCCCCCCCC/C=C\OC[C@H](COP([O-])(OCC[N+](C)(C)C)=O)O		9093054	HMDB0010407		10917802
glycerol 3-phosphate	0.00244781	0.0198051	0.61609	0.435002	1.59934	0.012434	Lipid	Glycerolipid Metabolism	AWUCVROLDVIAJX-UHFFFAOYSA-N	O=P(O)(OCC(CO)O)O	29849-82-9	734	HMDB0000126	C0093	754
1-linoleoylglycerol (18:2)	0.00488426	0.0539812	0.808711	0.415817	1.64508	0.0184758	Lipid	Monoacylglycerol	WECGLUPZRHILCT-HZJYTTRNSA-N	CCCCC/C=C\C/C=C\CCCCCCCC(OCC(O)CO)=O	2277-28-3	4446589	HMDB0011568		5283469
1-arachidonylglycerol (20:4)	2.24585e-05	0.0252215	0.853186	0.583455	2.04977	0.00114081	Lipid	Monoacylglycerol	DCPCOKIYJYGMDN-DOFZRALJSA-N	O=C(CCC/C=C\C/C=C\C/C=C\C/C=C\CCCCC)OCC(O)CO	35474-99-8	4445452	HMDB11578	C13857
2-arachidonoylglycerol (20:4)	0.00193478	0.00515878	0.959606	0.432971	1.53561	0.0112781	Lipid	Monoacylglycerol	RCRCTBLIHCHWDZ-DOFZRALJSA-N	CCCCC\C=C/C\C=C/C\C=C/C/C=C\CCCC(OC(CO)CO)=O	53847-30-6	4445451	HMDB0004666	C13856	5282280
N-palmitoyl-sphinganine (d18:0/16:0)	1.75001e-05	0.611663	0.0360539	0.538964	1.73728	0.0010371	Lipid	Dihydroceramides	GCGTXOVNNFGTPQ-JHOUSYSJSA-N	[H][C@](NC(CCCCCCCCCCCCCCC)=O)(CO)[C@@](O)([H])CCCCCCCCCCCCCCC	5966-29-0	4446685	HMDB11760		5283572
N-stearoyl-sphingosine (d18:1/18:0)*	0.000353457	0.885571	0.09983	0.502709	1.72079	0.00478914	Lipid	Ceramides	VODZWWMEJITOND-NXCSZAMKSA-N	OC[C@H](NC(CCCCCCCCCCCCCCCCC)=O)[C@H](O)/C=C/CCCCCCCCCCCCC	104404-17-3	4446678	HMDB0004950		5283565
ceramide (d16:1/24:1, d18:1/22:1)*	0.00459223	0.153571	0.0302116	0.443102	1.54752	0.0180037	Lipid	Ceramides	ODRVSCJZSDNQBP-LMGPGFSZSA-N	OC(/C=C/CCCCCCCCCCC)C(CO)NC(CCCCCCCCCCCCC/C=C\CCCCCCCC)=O
glycosyl-N-behenoyl-sphingosine (d18:1/22:0)*	0.00228338	0.432841	0.513325	-0.450704	0.726386	0.0121181	Lipid	Hexosylceramides (HCER)	YIGARKIIFOHVPF-YMBRMJIUSA-N	[H][C@](NC(CCCCCCCCCCCCCCCCCCCCC)=O)(CO[C@H]1[C@H](O)[C@@H](O)[C@@H](O)[C@H](O1)CO)[C@@](O)([H])/C=C/CCCCCCCCCCCCC		24846901
glycosyl-N-behenoyl-sphingadienine (d18:2/22:0)*	0.00275358	0.63422	0.322573	-0.42109	0.685861	0.0131746	Lipid	Hexosylceramides (HCER)	BZVOAOVDSULRAB-NUBHLNQHSA-N	[H][C@](NC(CCCCCCCCCCCCCCCCCCCCC)=O)(CO[C@H]1[C@H](O)[C@@H](O)[C@@H](O)[C@@H](CO)O1)[C@@](O)([H])/C=C/CCCCCCCC/C=C\CCC
sphingomyelin (d18:0/18:0, d19:0/17:0)*	0.00339788	0.567394	0.039361	0.426237	1.54165	0.0152743	Lipid	Dihydrosphingomyelins	JCELSEVNSMXGKA-IOLBBIBUSA-N	[H][C@](NC(CCCCCCCCCCCCCCCCC)=O)(COP(OCC[N+](C)(C)C)([O-])=O)[C@@](O)([H])CCCCCCCCCCCCCCC		24846878	HMDB0012087		44260130
tricosanoyl sphingomyelin (d18:1/23:0)*	0.00592189	0.0590388	0.83595	-0.418663	0.780314	0.0212695	Lipid	Sphingomyelins	SXZWBNWTCVLZJN-NMIJJABPSA-N	[H][C@](NC(CCCCCCCCCCCCCCCCCCCCCC)=O)(COP(OCC[N+](C)(C)C)([O-])=O)[C@@](O)([H])/C=C/CCCCCCCCCCCCC			HMDB0012105
lignoceroyl sphingomyelin (d18:1/24:0)	0.00122867	0.0102968	0.915054	-0.468764	0.759932	0.0094975	Lipid	Sphingomyelins	QEDPUVGSSDPBMD-XTAIVQBESA-N	CCCCCCCCCCCCC/C=C/[C@@H](O)[C@@H](NC(CCCCCCCCCCCCCCCCCCCCCCC)=O)COP([O-])(OCC[N+](C)(C)C)=O	60037-60-7	24846875	HMDB0011697
sphingomyelin (d18:1/20:1, d18:2/20:0)*	0.000882843	0.101872	0.695186	-0.457299	0.788444	0.00747423	Lipid	Sphingomyelins	MDRFMTLYKHBJTF-YECRPIIFSA-N	CCCCCCCCCCCCC/C=C/[C@@H](O)[C@@H](NC(CCCCCCCCC/C=C/CCCCCCCC)=O)COP([O-])(OCC[N+](C)(C)C)=O	222403-67-0		HMDB0240610,HMDB0240632
sphingomyelin (d18:1/22:1, d18:2/22:0, d16:1/24:1)*	3.35425e-05	0.593325	0.457424	-0.586641	0.733778	0.00119659	Lipid	Sphingomyelins	VBFKEZGCUWHGSK-ADSSWVSQSA-N	CCCCCCCCCCCCC/C=C/[C@@H](O)[C@@H](NC(CCCCCCCCCCC/C=C\CCCCCCCC)=O)COP([O-])(OCC[N+](C)(C)C)=O		29368329	HMDB0012104
hexadecasphingosine (d16:1)*	0.00217243	0.0448489	0.598456	-0.395954	0.61438	0.0118927	Lipid	Sphingosines	BTUSGZZCQZACPT-YYZTVXDQSA-N	OC[C@H](N)[C@H](O)/C=C/CCCCCCCCCCC		28533427			14767871
glycocholate	0.0045129	0.0705723	0.0275509	0.347394	2.7309	0.0180037	Lipid	Primary Bile Acid Metabolism	RFDAIACWWDREDC-FRVQLJSFSA-N	O=C(CNC(CC[C@H]([C@@H]1[C@@]2(C)[C@@H](O)C[C@]3([H])[C@@]4(C)CC[C@@H](O)C[C@@]4([H])C[C@@H](O)[C@@]3([H])[C@]2([H])CC1)C)=O)O	475-31-0,863-57-0	9734	HMDB0000138	C01921	10140
glycochenodeoxycholate glucuronide (1)	0.00357913	0.711968	0.902056	0.437047	2.1832	0.0155801	Lipid	Primary Bile Acid Metabolism	ABFZMYIIUREPLL-ASWJIRIHSA-N	O[C@H]1[C@@]2([C@@]([H])([C@]3(CC[C@H](C[C@]3(C1)[H])O[C@H]4[C@@H]([C@H]([C@@H]([C@H](O4)C(O)=O)O)O)O)C)CC[C@]5([C@]2(CC[C@@H]5[C@@H](CCC(NCC(O)=O)=O)C)[H])C)[H]			HMDB0002579		44263370
glycochenodeoxycholate 3-sulfate	7.13982e-05	0.316737	0.453433	0.53062	3.30889	0.00158672	Lipid	Primary Bile Acid Metabolism	DKXXSIJHWWVNMO-ISIKUUMTSA-N	OS(OC1C[C@]2([H])C(CC1)(C)[C@@H]3[C@@]([C@@](CC4)([H])[C@@](CC3)(C)[C@H]4[C@H](C)CCC(NCC(O)=O)=O)([H])[C@H](O)C2)(=O)=O			HMDB0002409,HMDB0002496,HMDB0002497
glycoursodeoxycholic acid sulfate (1)	0.00154198	0.437497	0.364794	0.469128	2.93447	0.00999564	Lipid	Secondary Bile Acid Metabolism	DKXXSIJHWWVNMO-XROMFQGDSA-N	[H][C@@]12[C@@]3(C)CC[C@@H](OS(=O)(O)=O)C[C@@]3([H])C[C@H](O)[C@@]1([H])[C@]4([H])CC[C@]([H])([C@H](C)CCC(NCC(O)=O)=O)[C@@]4(C)CC2
taurochenodeoxycholic acid 3-sulfate	0.000269854	0.552767	0.379199	0.538881	3.6143	0.00399806	Lipid	Secondary Bile Acid Metabolism	IJHJZQKOSUFQCX-WZJRQFJBSA-N	[H][C@@](CCC(NCCS(O)(=O)=O)=O)([C@]1(CC[C@]2([C@@]3([C@@H](C[C@@]4(C[C@H](S(O)(=O)=O)CC[C@@]4([C@]3(C[C@H]([C@]12C)O)[H])C)[H])O)[H])[H])[H])C		24850141	HMDB0002486		52931550
AMP	0.00406466	0.391677	0.918826	-0.32838	0.471001	0.0168256	Nucleotide	Purine Metabolism, Adenine containing	UDMBCSSLTHHNCD-UHFFFAOYSA-N	NC1=NC=NC2=C1N=CN2C3OC(C(C3O)O)COP(O)(O)=O	149022-20-8	10239183	HMDB0000045	C00020	6083
1-methyladenosine	0.00372837	0.310024	0.31847	0.394803	1.19816	0.0159725	Nucleotide	Purine Metabolism, Adenine containing	GFYLSDSUCHVORB-IOSLPCCCSA-N	N=C1C2=C(N([C@@]3([H])[C@@](O)([H])[C@@](O)([H])[C@](CO)([H])O3)C=N2)N=CN1C	15763-06-1	4573813	HMDB0003331	C02494	27476
N6-methyladenosine	0.000468081	0.89763	0.339069	0.46381	1.2894	0.00554795	Nucleotide	Purine Metabolism, Adenine containing	VQAYFKKCNSOZKM-UHFFFAOYSA-N	OC(C1O)C(OC1CO)N(C=N2)C3=C2C(NC)=NC=N3	1867-73-8	92307	HMDB0004044		102175
uracil	0.000631399	0.0135555	0.0090524	0.491245	2.00642	0.00660324	Nucleotide	Pyrimidine Metabolism, Uracil containing	ISAKRJDGNUQOIC-UHFFFAOYSA-N	O=C(NC=C1)NC1=O	66-22-8	1141	HMDB0000300	C00106	1174
5-methyluridine (ribothymidine)	0.00136386	0.848285	0.224614	-0.357588	0.799619	0.00999564	Nucleotide	Pyrimidine Metabolism, Uracil containing	DWRXFEITVBNRMK-JXOAFFINSA-N	O[C@@H]1[C@H](O)[C@@H](CO)O[C@H]1N(C=C2C)C(NC2=O)=O	1463-10-1	393058	HMDB0000884		445408
3-ureidopropionate	0.00145252	0.0791726	0.466725	0.398007	1.53004	0.00999564	Nucleotide	Pyrimidine Metabolism, Uracil containing	JSJWCHRYRHKBBW-UHFFFAOYSA-N	OC(CCNC(N)=O)=O	462-88-4	109	HMDB0000026	C02642	111
3-(3-amino-3-carboxypropyl)uridine*	0.00304717	0.89436	0.43254	0.444637	1.24732	0.0140714	Nucleotide	Pyrimidine Metabolism, Uracil containing	YXNIEZJFCGTDKV-UHFFFAOYSA-N	OCC1C(O)C(O)C(N2C=CC(N(CCC(C(O)=O)N)C2=O)=O)O1	52745-94-5	149669			171198
2-O-methylascorbic acid	0.000499388	0.971795	0.533363	0.499007	1.36367	0.00572807	Cofactors and Vitamins	Ascorbate and Aldarate Metabolism	RMHBODZVODTFAH-UHFFFAOYSA-N	OC1=C(OC)C(C(C(CO)O)O1)=O	17860-87-6	90149	HMDB0240294		54726398
bilirubin (E,Z or Z,E)*	0.000117921	0.13185	0.257967	-0.474387	0.499165	0.0020965	Cofactors and Vitamins	Hemoglobin and Porphyrin Metabolism	BPYKTIZUTYGOLE-BMNRKXRESA-N	CC(C(N/1)=O)=C(C=C)C1=C/C2=C(C)C(CCC(O)=O)=C(CC3=C(CCC(O)=O)C(C)=C(/C=C4NC(C(C=C)=C/4C)=O)N3)N2		4705847	HMDB0000488	C00486	5799469

## Sheet: Prot 0 wk ARFvHealthy
somaid	symbol	logFC	AveExpr	t	P.Value	adj.P.Val
seq.8989.40	SCUBE1	2.42205	9.33047	13.8999	3.31816e-15	2.21122e-11
seq.14146.92	H3C1	-2.76609	11.9348	-13.2524	1.24336e-14	4.14288e-11
seq.14094.29	HBEGF	2.54413	10.4396	11.5035	5.57863e-13	1.2392e-09
seq.3070.1	IL2	1.37399	11.0193	11.2409	9.82495e-13	1.40464e-09
seq.5939.42	TNFSF12	0.793806	9.66504	11.2007	1.0539e-12	1.40464e-09
seq.2977.7	EDAR	-1.03407	10.3883	-10.2611	1.02046e-11	1.13339e-08
seq.6406.3	NMES1	-1.31956	12.4119	-10.0326	1.73644e-11	1.65309e-08
seq.20133.1	MAGEA3	-1.47314	12.0985	-9.90916	2.36358e-11	1.96887e-08
seq.3314.74	GFRA1	1.09959	9.59014	9.51736	6.61508e-11	4.8981e-08
seq.8351.17	PRSS57	1.91019	10.3926	9.39865	8.94386e-11	5.96019e-08
seq.23342.4	ARRDC5	1.44489	11.0628	9.18199	1.55843e-10	9.44126e-08
seq.24679.35	ETV7	-0.824866	11.9554	-9.093	1.88097e-10	1.04457e-07
seq.13738.8	INHBA	1.80531	9.83026	8.97945	2.63346e-10	1.34995e-07
seq.18397.5	AKR1C4	1.6436	9.2287	8.60215	7.09807e-10	3.17107e-07
seq.7192.37	IFNLR1	0.618777	9.62415	8.58736	7.13775e-10	3.17107e-07
seq.22844.4	ZSWIM7	-0.650493	9.9016	-8.54523	7.95542e-10	3.31343e-07
seq.2911.27	MDK	0.681499	10.3327	8.44222	1.04789e-09	4.10771e-07
seq.5484.63	RPS3A	0.771866	10.4924	8.41446	1.12969e-09	4.18235e-07
seq.15515.2	SAA1	4.66512	13.6639	8.38485	1.26693e-09	4.3276e-07
seq.4337.49	CRP	3.20639	14.5299	8.37558	1.2988e-09	4.3276e-07
seq.5598.3	GREM2	0.758561	11.9173	8.2589	1.71662e-09	5.44742e-07
seq.2692.74	PLA2G2A	2.70337	11.5582	8.2066	2.04679e-09	6.19993e-07
seq.7202.107	SEMA6C	0.560046	9.10976	8.06778	2.9054e-09	8.41808e-07
seq.25209.15	FXYD2	0.317812	11.3418	7.91722	4.35533e-09	1.20933e-06
seq.6425.87	MMP19	0.718652	13.2436	7.89235	4.66326e-09	1.24304e-06
seq.5465.32	HS6ST1	0.58227	10.4631	7.63503	9.49585e-09	2.43386e-06
seq.17138.8	GSTA1	0.4091	10.5143	7.5118	1.3385e-08	3.30361e-06
seq.9796.4	CEL	1.60359	11.2736	7.44202	1.67331e-08	3.84514e-06
seq.11568.2	FKBP1B	-1.28086	10.7816	-7.44599	1.65485e-08	3.84514e-06
seq.3336.50	TFPI	0.890647	14.521	7.36301	2.03044e-08	4.51029e-06
seq.18342.2	PSAT1	0.859735	13.0763	7.30567	2.38567e-08	5.12842e-06
seq.11573.3	SRSF6	0.589322	9.51164	7.17717	3.46311e-08	6.76376e-06
seq.5807.77	CD70	0.250285	8.87086	7.15465	3.65389e-08	6.76376e-06
seq.7933.75	ADAM22	-0.646686	12.4706	-7.18674	3.33676e-08	6.76376e-06
seq.8780.2	PCDH10	-0.830649	11.7388	-7.16142	3.58457e-08	6.76376e-06
seq.23622.128	INIP	-1.02257	13.0054	-7.17646	3.43524e-08	6.76376e-06
seq.22397.2	XBP1	0.486671	7.77418	7.10882	4.18351e-08	7.33655e-06
seq.7197.2	DNAJC15	0.252942	8.66425	7.11003	4.14622e-08	7.33655e-06
seq.13748.4	CCL8	0.516636	8.47211	7.0942	4.36882e-08	7.46509e-06
seq.3077.66	F10	0.530581	12.0744	7.04933	4.92572e-08	7.9778e-06
seq.23340.37	MRI1	-0.556416	10.5793	-7.05134	4.89767e-08	7.9778e-06
seq.21660.4	SAR1B	-1.41396	13.2006	-7.04453	5.02803e-08	7.9778e-06
seq.9749.190	LCP1	0.560598	13.8745	7.02049	5.34649e-08	8.28582e-06
seq.5612.16	HINT2	-0.96692	11.2093	-7.00315	5.69878e-08	8.63106e-06
seq.5803.24	C3	0.884592	12.8511	6.96398	6.27955e-08	9.29932e-06
seq.2597.8	VEGFA	0.593707	12.8886	6.95514	6.43975e-08	9.32923e-06
seq.8459.10	BMP6	-0.762721	9.30574	-6.93983	6.89188e-08	9.77181e-06
seq.14603.51	KIAA0040	0.811479	10.9191	6.91195	7.38231e-08	1.02491e-05
seq.14237.1	HSPA1A	-0.494386	11.0381	-6.86883	8.23877e-08	1.12047e-05
seq.22783.40	SPI1	2.01918	10.9184	6.82201	9.6412e-08	1.28498e-05
seq.20076.7	MNDA	1.57812	16.1503	6.77138	1.09941e-07	1.38235e-05
seq.2851.63	C5	0.804911	13.3922	6.76901	1.09638e-07	1.38235e-05
seq.3322.52	LRIG3	0.754789	12.6881	6.77918	1.06487e-07	1.38235e-05
seq.2505.49	GFRA3	0.495303	10.7117	6.73988	1.19192e-07	1.47091e-05
seq.4925.54	MMP13	1.29712	9.94654	6.68923	1.40962e-07	1.65295e-05
seq.20213.82	HSPA6	-0.810114	11.865	-6.68169	1.40874e-07	1.65295e-05
seq.10464.6	ANTXR1	-0.819086	10.933	-6.68507	1.41384e-07	1.65295e-05
seq.5691.2	CRISPLD2	2.13769	10.014	6.64501	1.60027e-07	1.78098e-05
seq.9377.25	KITLG	-0.743334	10.7022	-6.64115	1.60352e-07	1.78098e-05
seq.12408.333	RAB22A	-0.933538	11.0124	-6.64617	1.58599e-07	1.78098e-05
seq.11387.3	ATF6B	1.33183	10.3964	6.5857	1.89751e-07	2.03744e-05
seq.2876.74	TOP1	0.585952	9.66921	6.5862	1.87686e-07	2.03744e-05
seq.13473.55	ITPKA	-0.283571	10.5323	-6.57304	1.92615e-07	2.03744e-05
seq.11219.95	FGFBP3	1.3949	10.4854	6.5666	2.00462e-07	2.0552e-05
seq.5813.58	EPO	0.792298	10.0915	6.57164	1.97581e-07	2.0552e-05
seq.15542.19	CKMT1A	1.83406	13.9501	6.53855	2.17319e-07	2.16152e-05
seq.21604.2	CUTA	0.5457	10.3859	6.53259	2.16547e-07	2.16152e-05
seq.24244.81	RILP	1.63669	10.2013	6.52019	2.29114e-07	2.23772e-05
seq.19767.20	CCNE1	0.484739	11.9685	6.50903	2.31697e-07	2.23772e-05
seq.17678.28	VSIG4	1.08653	12.1256	6.48577	2.50264e-07	2.38252e-05
seq.25902.27	GLUD1	0.988251	10.6246	6.46735	2.66806e-07	2.50422e-05
seq.21247.16	MAT1A	0.958952	8.77033	6.44015	2.88585e-07	2.67101e-05
seq.22141.59	PFKFB1	1.21154	11.9929	6.41706	3.06545e-07	2.77613e-05
seq.25108.6	ATE1	0.977749	11.4726	6.4144	3.08274e-07	2.77613e-05
seq.19158.1	PCLAF	0.888109	11.9682	6.40231	3.15485e-07	2.80319e-05
seq.5443.62	NPPA	0.419682	10.7784	6.36657	3.49908e-07	3.06814e-05
seq.5708.1	LEAP2	1.29692	14.1347	6.3488	3.69147e-07	3.1948e-05
seq.22953.85	CEBPB	0.230931	10.0203	6.33346	3.85177e-07	3.29079e-05
seq.25262.6	ZW10	0.593684	13.0031	6.3039	4.19668e-07	3.50936e-05
seq.4878.3	F10	0.484582	12.2403	6.30257	4.21291e-07	3.50936e-05
seq.25413.80	GAGE2B	-1.01316	12.6332	-6.29698	4.28191e-07	3.5228e-05
seq.2683.1	C3	0.790616	14.0336	6.28757	4.40053e-07	3.57624e-05
seq.19154.41	SERPINE2	1.38731	13.847	6.27373	4.61526e-07	3.66144e-05
seq.2681.23	HGF	0.911269	10.7345	6.28058	4.57824e-07	3.66144e-05
seq.15594.47	HTRA1	1.01262	14.3073	6.24109	5.03686e-07	3.9489e-05
seq.9259.35	TNFRSF21	0.570849	12.0592	6.18552	5.92044e-07	4.58765e-05
seq.4122.12	DDR1	0.289737	8.74587	6.16839	6.22315e-07	4.76679e-05
seq.5487.7	SLAMF7	0.572866	11.1671	6.16394	6.30423e-07	4.77402e-05
seq.25907.47	EML2	0.337161	10.9223	6.14923	6.58028e-07	4.92708e-05
seq.8243.55	SPINK1	0.275025	9.62442	6.14245	6.7115e-07	4.96949e-05
seq.6433.57	FAM20A	0.552019	10.935	6.09996	7.59621e-07	5.56276e-05
seq.6998.106	ASPH	0.745682	11.2032	6.01297	9.84049e-07	7.072e-05
seq.22055.31	FOXO1	0.617136	12.4021	6.01023	9.86938e-07	7.072e-05
seq.13427.66	MAN1C1	0.446072	9.80715	5.99817	1.0241e-06	7.26024e-05
seq.15559.5	ANTXR2	-1.16493	12.5988	-5.94549	1.2043e-06	8.44785e-05
seq.21152.25	EYA2	0.316022	10.4293	5.9368	1.22307e-06	8.49017e-05
seq.22985.160	IGFBP2	0.991468	15.1322	5.9115	1.31698e-06	9.04782e-05
seq.2946.52	CFD	0.697824	14.6714	5.90423	1.34528e-06	9.14793e-05
seq.16818.200	CDCP1	0.81097	11.0763	5.90328	1.36253e-06	9.17159e-05
seq.18942.11	PSMB9	-0.482934	10.9303	-5.88333	1.43006e-06	9.52991e-05
seq.9250.87	DEFA1	1.13636	12.258	5.87314	1.48793e-06	9.81737e-05
seq.21286.29	RPL11	0.400813	10.1685	5.86332	1.5163e-06	9.90647e-05
seq.19482.11	HDHD3	-0.455727	11.8922	-5.83785	1.63363e-06	0.000104173
seq.14123.34	VSIR	-0.633577	12.5136	-5.83624	1.64138e-06	0.000104173
seq.12616.45	NRBP1	-1.01597	11.9092	-5.84352	1.62244e-06	0.000104173
seq.18213.30	UBE2F	-0.510746	9.5091	-5.81126	1.78293e-06	0.000112089
seq.6527.1	TRIL	0.369971	11.1606	5.79641	1.84437e-06	0.000114617
seq.4332.6	CLEC1B	-1.05634	14.4169	-5.79398	1.85754e-06	0.000114617
seq.9061.3	ARHGEF10	-0.333365	10.0009	-5.74442	2.14778e-06	0.00013131
seq.24721.17	GOLPH3	-1.54435	12.6614	-5.72146	2.33292e-06	0.000141333
seq.16617.14	CASP14	-0.68535	10.0164	-5.71421	2.38295e-06	0.000143063
seq.7090.17	GALNT1	0.245818	10.2386	5.70411	2.41713e-06	0.000143819
seq.7857.22	NTS	1.02611	11.0982	5.69772	2.50068e-06	0.00014618
seq.15641.20	TMEFF1	-0.465663	10.907	-5.69368	2.49219e-06	0.00014618
seq.6603.18	ANOS1	-0.487253	11.26	-5.67763	2.6122e-06	0.000151371
seq.3714.49	CKB	-1.13845	10.4267	-5.67608	2.66403e-06	0.000153044
seq.22841.16	ZNF696	-1.36205	13.8283	-5.65676	2.80213e-06	0.000159602
seq.3727.35	PYY	0.638872	10.1838	5.65067	2.86966e-06	0.000162063
seq.6255.74	CPXM1	1.37213	12.5236	5.6298	3.05033e-06	0.000167753
seq.7141.21	MGAT4B	0.587183	12.0982	5.6194	3.09862e-06	0.000167753
seq.21508.7	ST8SIA1	0.500458	12.4402	5.61827	3.10894e-06	0.000167753
seq.9723.105	MMRN2	0.387624	9.71109	5.61496	3.1393e-06	0.000167753
seq.3520.58	TGFB3	0.297523	8.43468	5.61416	3.14663e-06	0.000167753
seq.12686.15	MPST	-0.468914	10.7413	-5.61666	3.12368e-06	0.000167753
seq.5701.81	CLEC3B	-0.504695	12.6115	-5.62169	3.07792e-06	0.000167753
seq.6390.18	NPS	-0.45059	13.1107	-5.59995	3.2806e-06	0.000173507
seq.2937.10	APOE	0.500391	15.7386	5.56749	3.6084e-06	0.000189342
seq.6379.62	ADAMTSL2	0.398691	10.2327	5.56235	3.66317e-06	0.000190714
seq.3580.25	SERPINA1	0.68987	15.4857	5.55774	3.71311e-06	0.000191123
seq.14759.149	CDH1	0.281202	10.875	5.55373	3.75707e-06	0.000191123
seq.6555.58	STOML2	-0.423476	10.3547	-5.55511	3.74189e-06	0.000191123
seq.24647.3	APOBEC2	-0.51116	11.266	-5.55024	3.79565e-06	0.000191623
seq.3204.2	LTA4H	0.780146	11.6727	5.54864	3.82701e-06	0.000191753
seq.17816.58	NCALD	-0.733063	12.1307	-5.50707	4.30833e-06	0.000214259
seq.3396.54	REN	1.22602	13.6059	5.49959	4.43847e-06	0.000219096
seq.14116.129	S100A4	-0.573465	10.6704	-5.49472	4.48405e-06	0.000219719
seq.3591.51	CDH6	-0.643294	11.9333	-5.45692	4.99157e-06	0.000242802
seq.8942.2	MRPL21	-0.584213	10.9262	-5.45499	5.03584e-06	0.00024318
seq.12759.47	ILF3	0.709343	10.0938	5.44978	5.1673e-06	0.000247733
seq.8469.41	IGFBP2	1.45071	14.2062	5.43821	5.34541e-06	0.000252881
seq.13552.7	SWAP70	0.640384	11.3285	5.43373	5.35058e-06	0.000252881
seq.9197.4	LGALS9	0.324215	10.7069	5.42435	5.49228e-06	0.000255948
seq.12594.5	GCA	-0.476658	10.0766	-5.4272	5.46703e-06	0.000255948
seq.5029.3	FAP	-0.837519	10.6169	-5.42307	5.58781e-06	0.000258591
seq.3613.62	FCN1	0.82145	12.8464	5.40838	5.75599e-06	0.000264537
seq.11116.16	C11orf87	0.373953	11.582	5.38678	6.13266e-06	0.000279918
seq.18177.49	NAE1	-0.461353	10.8917	-5.38431	6.17728e-06	0.000280037
seq.2742.68	SIGLEC7	0.385853	10.0364	5.3765	6.32067e-06	0.000284601
seq.8759.29	A4GALT	-0.389158	9.96239	-5.36095	6.61574e-06	0.000293915
seq.19223.6	RAB1A	-0.996524	14.8231	-5.36163	6.60256e-06	0.000293915
seq.19506.6	GLYAT	0.498118	11.1097	5.35084	6.81508e-06	0.00029561
seq.18893.26	ADGRG1	0.307411	10.648	5.34782	6.87569e-06	0.00029561
seq.12848.9	ARHGEF2	-0.389976	10.987	-5.35299	6.77218e-06	0.00029561
seq.14029.42	COPS2	-0.646425	12.2436	-5.34889	6.85432e-06	0.00029561
seq.7747.47	NDUFB11	-0.726855	12.0878	-5.35424	6.74747e-06	0.00029561
seq.17706.4	PPP1R1A	0.25261	10.1551	5.33947	7.04632e-06	0.000301004
seq.6557.50	LRRC15	-1.13884	12.3945	-5.33767	7.13892e-06	0.000303017
seq.20187.10	ITGAV	-0.921439	11.9491	-5.33044	7.29174e-06	0.000307545
seq.23359.25	WTAP	0.376461	12.0478	5.31841	7.49583e-06	0.000312201
seq.5688.65	CBLN4	-0.783369	11.5395	-5.32171	7.47958e-06	0.000312201
seq.3044.3	CCL18	0.577894	16.5817	5.29297	8.07696e-06	0.000334316
seq.13117.232	CHKB	-1.22125	13.3282	-5.28981	8.2141e-06	0.000337893
seq.9257.14	TACO1	-1.58302	11.6507	-5.28155	8.45793e-06	0.000345789
seq.14049.17	IL7	0.481342	9.47409	5.27591	8.57078e-06	0.000348267
seq.2670.67	CKM	-0.844525	9.79531	-5.2673	8.81853e-06	0.000356162
seq.14032.2	VEGFA	0.806269	10.5602	5.25445	9.15652e-06	0.000363209
seq.3401.8	PTPN2	0.225058	9.2002	5.25222	9.10291e-06	0.000363209
seq.4785.30	SERPINA6	-0.150244	8.8961	-5.25176	9.11525e-06	0.000363209
seq.12534.10	CALCOCO2	-0.265983	11.8464	-5.24285	9.3566e-06	0.000368949
seq.25266.14	OSBPL1A	-1.3174	11.3672	-5.23597	9.66574e-06	0.000378897
seq.20134.27	MARCO	0.676601	7.47799	5.23283	9.75513e-06	0.000380165
seq.18405.117	AP1S2	-0.490929	11.2725	-5.2254	9.8483e-06	0.000381564
seq.4374.45	GDF15	0.668071	13.8142	5.22218	9.94174e-06	0.000382958
seq.4125.52	AGER	1.979	10.896	5.22203	1.00685e-05	0.000385613
seq.6414.8	OAF	0.511372	13.0401	5.21573	1.01319e-05	0.000385821
seq.6213.10	CGB2	0.270894	10.1293	5.20881	1.03395e-05	0.000391491
seq.4482.66	C5	0.377136	10.9213	5.19928	1.06326e-05	0.000400315
seq.8819.3	IGFBP2	1.2997	13.916	5.19722	1.07933e-05	0.000404081
seq.13114.50	LUM	-0.488268	12.7678	-5.16732	1.16776e-05	0.000434748
seq.17515.6	HSPA13	0.487775	12.2874	5.15282	1.21851e-05	0.00045112
seq.3029.52	CD209	-0.576855	11.2234	-5.14582	1.24485e-05	0.000458325
seq.18864.7	PRSS3	0.662428	9.27497	5.14435	1.26393e-05	0.000462793
seq.22496.21	LYRM1	-0.473894	12.0251	-5.12817	1.30984e-05	0.000476983
seq.5017.19	PRDX5	-0.194648	8.85843	-5.11782	1.35021e-05	0.000486366
seq.17737.7	IVD	-1.6589	13.7987	-5.12343	1.34373e-05	0.000486366
seq.21736.60	HS2ST1	-0.302083	11.5175	-5.11254	1.37129e-05	0.000491304
seq.23672.10	PSMD6	-0.471929	11.5649	-5.10532	1.4006e-05	0.000499122
seq.4811.33	ITIH4	0.463132	15.184	5.09028	1.46374e-05	0.000513673
seq.17691.1	TPP1	0.373656	10.8627	5.09024	1.46393e-05	0.000513673
seq.2823.7	COMMD7	-0.981156	12.2275	-5.09243	1.46455e-05	0.000513673
seq.21999.61	NUCB2	0.219683	9.90257	5.0699	1.55383e-05	0.00053931
seq.11355.10	EIF5A2	-1.50292	14.237	-5.07417	1.55202e-05	0.00053931
seq.2704.74	TNFRSF13B	0.299479	10.2329	5.06595	1.57193e-05	0.000539966
seq.8013.9	LMAN2L	-1.16403	11.5244	-5.07154	1.56401e-05	0.000539966
seq.18832.65	SAA2	2.26239	12.0297	5.02404	1.79703e-05	0.000614125
seq.8009.121	SURF1	0.658422	12.6969	5.01433	1.82857e-05	0.000621714
seq.11215.6	CDH15	0.513985	12.0082	5.01084	1.84737e-05	0.000624918
seq.20387.277	CHCHD7	0.404832	10.9733	5.00788	1.86342e-05	0.000627162
seq.18821.9	C4A	1.11525	12.8575	5.00375	1.89848e-05	0.000635702
seq.2788.55	MMP3	0.715633	8.51942	5.00357	1.90787e-05	0.000635702
seq.13022.20	TP53I11	1.15832	11.3939	4.9886	1.99317e-05	0.000660821
seq.3473.78	MPL	-0.701404	8.80872	-4.97105	2.09801e-05	0.000692137
seq.2813.11	AGRP	0.590867	10.3097	4.96404	2.14143e-05	0.000702981
seq.13933.276	NAB1	-0.832712	13.2682	-4.95278	2.1896e-05	0.00071527
seq.5725.1	OMD	-0.818142	12.0084	-4.94648	2.23954e-05	0.000728013
seq.12578.13	ARF3	-0.704769	11.6371	-4.94421	2.25568e-05	0.0007297
seq.18185.118	ALDOB	0.720908	11.3439	4.93848	2.29766e-05	0.000737495
seq.10015.119	KCNAB2	-0.205192	9.97317	-4.93568	2.30191e-05	0.000737495
seq.12446.49	GSTA1	0.650073	12.2164	4.92906	2.34695e-05	0.000748327
seq.11833.83	FXN	-0.308747	9.93185	-4.91648	2.43492e-05	0.000772681
seq.19327.31	HAT1	0.454543	11.924	4.91315	2.45871e-05	0.000776534
seq.3357.67	CDK2	0.27498	9.15832	4.8926	2.61098e-05	0.000820736
seq.7140.1	CELA2A	0.444447	10.8251	4.88929	2.6364e-05	0.000822073
seq.10506.53	PGRMC2	-0.593804	10.8917	-4.89048	2.63991e-05	0.000822073
seq.24490.16	THAP4	-0.477162	11.0352	-4.88517	2.66831e-05	0.000827052
seq.7211.2	RNASE1	0.674885	8.95416	4.87289	2.79418e-05	0.000862056
seq.6605.17	IGFALS	-0.630416	14.7816	-4.86732	2.81124e-05	0.000863323
seq.24646.47	AGXT	0.354485	8.94453	4.85782	2.90165e-05	0.000882854
seq.3065.65	FGF5	0.300444	9.54743	4.85558	2.90933e-05	0.000882854
seq.3642.4	CD84	-0.47396	13.1228	-4.85496	2.91458e-05	0.000882854
seq.12428.2	LYPLAL1	-0.201134	10.2893	-4.84998	2.95732e-05	0.000891745
seq.3040.59	CCL3	0.41818	10.0486	4.84659	2.99518e-05	0.000899093
seq.5383.14	TNFRSF13C	-0.886014	10.9762	-4.84033	3.07247e-05	0.000918157
seq.15667.39	BMP4	0.406817	10.0363	4.83024	3.13847e-05	0.000933694
seq.20913.27	EIF1	0.727102	12.7635	4.82631	3.16898e-05	0.000938581
seq.11313.100	PCBD1	0.563956	10.9526	4.80885	3.34428e-05	0.000986117
seq.17345.12	ZADH2	-1.96253	12.4606	-4.80548	3.40079e-05	0.000998364
seq.2431.17	CTSG	0.684201	11.1062	4.79676	3.47502e-05	0.00100714
seq.20562.78	KLRB1	0.544703	10.0713	4.79879	3.46776e-05	0.00100714
seq.5822.22	GDNF	0.197915	9.09687	4.79462	3.47602e-05	0.00100714
seq.23183.6	RNF31	-1.13946	11.2074	-4.79442	3.51217e-05	0.00101321
seq.25121.7	NOMO2	0.418637	10.3062	4.76697	3.77373e-05	0.00107932
seq.21475.137	TXNL1	-0.748632	11.9097	-4.76862	3.76044e-05	0.00107932
seq.13104.32	EFNB1	-0.346611	10.6912	-4.76338	3.80765e-05	0.00108437
seq.21290.66	HUS1	0.667293	11.1386	4.76174	3.84793e-05	0.00108553
seq.10917.40	GNGT2	0.316606	9.34942	4.75864	3.8606e-05	0.00108553
seq.8697.38	GPC1	-0.384335	12.0202	-4.76076	3.83686e-05	0.00108553
seq.23543.92	TRUB1	-1.30285	12.1068	-4.75565	3.93175e-05	0.00110089
seq.3168.8	ADAMTS5	0.165226	8.94169	4.74691	3.99496e-05	0.00110927
seq.16809.1	NME4	-1.59398	12.9897	-4.75052	3.99088e-05	0.00110927
seq.8060.7	NRG2	0.276988	7.89014	4.74407	4.02814e-05	0.00111132
seq.18179.56	SMS	-0.325252	10.2568	-4.74342	4.0357e-05	0.00111132
seq.5632.6	CRTAC1	-0.486202	10.5913	-4.74174	4.07375e-05	0.00111718
seq.6462.12	TIMP4	0.440942	11.1881	4.73506	4.1353e-05	0.00112941
seq.5301.7	CCL11	0.633942	12.7313	4.7266	4.23844e-05	0.00115286
seq.13720.95	PRTN3	0.611979	11.3531	4.72557	4.26094e-05	0.00115427
seq.15431.31	OTC	1.08342	10.8385	4.72631	4.28201e-05	0.00115528
seq.5644.60	RNASE4	0.471757	13.3261	4.7146	4.3893e-05	0.00117471
seq.2849.49	AIF1	-0.397922	14.2681	-4.71535	4.37968e-05	0.00117471
seq.23407.9	OLAH	0.359687	9.63623	4.70357	4.54223e-05	0.00121078
seq.25967.34	TIMP1	0.413644	15.2396	4.69004	4.71458e-05	0.00123693
seq.8363.18	ELAPOR2	0.205736	9.43353	4.69065	4.70618e-05	0.00123693
seq.9765.4	NDE1	-0.373363	10.3134	-4.69185	4.68979e-05	0.00123693
seq.6064.4	ERP44	-0.655122	14.43	-4.69344	4.6682e-05	0.00123693
seq.12954.71	PPARA	-0.729436	11.4733	-4.68982	4.74981e-05	0.00124128
seq.2695.25	PECAM1	0.397491	10.8721	4.68288	4.8139e-05	0.00124824
seq.6525.17	DUSP13	-0.528176	11.9619	-4.68369	4.80246e-05	0.00124824
seq.11334.7	LILRB3	-0.256979	10.2	-4.67945	4.86214e-05	0.00125586
seq.5618.50	FAM3B	-0.558833	11.623	-4.67644	4.90497e-05	0.00126203
seq.6897.38	B3GAT3	0.468079	9.37153	4.67123	5.02535e-05	0.00128454
seq.24892.8	SHCBP1L	0.225801	9.17938	4.66772	5.031e-05	0.00128454
seq.14038.130	CST7	1.10854	14.449	4.66418	5.10897e-05	0.00129947
seq.3373.5	GZMH	0.218917	9.17768	4.65498	5.22091e-05	0.0013229
seq.3217.74	SERPINE2	0.941613	12.0725	4.65596	5.25313e-05	0.00132602
seq.20549.1	IZUMO4	0.894116	9.63433	4.65331	5.29365e-05	0.0013262
seq.24643.21	CRYL1	-0.806402	11.7082	-4.65309	5.28492e-05	0.0013262
seq.21227.18	SULT1A1	-1.50675	12.8215	-4.65198	5.31417e-05	0.00132635
seq.18873.8	CEACAM8	0.652913	12.9774	4.64697	5.34384e-05	0.00132878
seq.20243.26	PFN1	-0.839206	16.2263	-4.64163	5.42738e-05	0.00133956
seq.11103.24	HSPB1	-1.34313	11.7491	-4.64576	5.411e-05	0.00133956
seq.2570.72	IGFBP2	1.27239	12.3168	4.64142	5.47957e-05	0.00134745
seq.15499.11	ATRN	-0.373627	10.1311	-4.63662	5.51211e-05	0.00135047
seq.18226.148	COX5A	-1.64917	12.3918	-4.63442	5.59197e-05	0.00136501
seq.24428.76	GDPD1	0.195418	9.07703	4.62364	5.7187e-05	0.00139085
seq.8046.9	LGALS1	-0.538152	11.1501	-4.62205	5.75801e-05	0.00139532
seq.18322.15	JMJD6	-0.392135	10.4304	-4.61802	5.81289e-05	0.00140352
seq.6385.63	VWA1	0.421102	9.56386	4.61882	5.83733e-05	0.00140433
seq.3622.33	LGMN	0.409492	11.528	4.611	5.93264e-05	0.00142213
seq.6938.21	PCDHGA12	0.500186	10.49	4.60823	6.01131e-05	0.00143582
seq.9199.6	UBE2G2	0.343498	11.0316	4.60062	6.11413e-05	0.00144013
seq.20106.80	DCPS	0.293415	11.9797	4.60209	6.08809e-05	0.00144013
seq.18316.75	SEPTIN3	0.236257	10.3749	4.60053	6.11579e-05	0.00144013
seq.8464.31	RSPO4	0.216198	9.02954	4.60124	6.10313e-05	0.00144013
seq.7189.55	CHST3	0.252486	9.22086	4.59258	6.25854e-05	0.00146855
seq.4455.89	MFGE8	0.585622	8.14625	4.58477	6.45756e-05	0.00150466
seq.7853.19	SCO1	-0.377194	11.0686	-4.58195	6.45462e-05	0.00150466
seq.8841.65	CILP2	-1.01089	12.0964	-4.58273	6.49577e-05	0.00150829
seq.7915.31	APLP2	0.333877	11.3728	4.57838	6.52184e-05	0.00150908
seq.24926.9	KHSRP	0.462016	13.4685	4.57151	6.65318e-05	0.00151813
seq.9834.62	ADH1B	0.294455	9.17318	4.57123	6.65859e-05	0.00151813
seq.10552.88	KLRC4	-0.400069	9.71132	-4.57382	6.6404e-05	0.00151813
seq.5594.87	MESD	-0.424448	10.3805	-4.57117	6.67485e-05	0.00151813
seq.13976.9	ARHGEF1	-0.831151	11.9791	-4.57654	6.59065e-05	0.00151813
seq.19601.15	ASB9	-0.717659	12.5702	-4.56111	6.85689e-05	0.00154896
seq.19372.7	MDGA2	-0.764496	11.8171	-4.56318	6.85072e-05	0.00154896
seq.24474.12	TTC9	-1.07222	11.4121	-4.56148	6.90808e-05	0.00155525
seq.9233.71	TFPI2	0.467401	9.49972	4.56012	6.9354e-05	0.00155587
seq.10531.18	NRAS	-0.852468	12.4042	-4.5578	6.95754e-05	0.00155587
seq.21811.20	ZCCHC17	-0.536901	11.3961	-4.55475	6.98449e-05	0.00155668
seq.8298.8	SSMEM1	-1.36687	13.2347	-4.54862	7.17009e-05	0.00159272
seq.5102.55	MICB	0.439249	10.0973	4.54445	7.21393e-05	0.00159713
seq.12817.1	GEM	-0.85519	12.3353	-4.54375	7.24483e-05	0.00159866
seq.25124.21	ZBTB7A	0.22304	9.91091	4.52846	7.53746e-05	0.00165774
seq.23654.6	ALG2	-0.907042	10.1348	-4.52941	7.57985e-05	0.00166158
seq.3823.9	MATK	0.252174	8.85515	4.52528	7.60717e-05	0.0016621
seq.3739.72	ITGA2B	-1.34604	15.0327	-4.52698	7.63328e-05	0.00166236
seq.23581.131	GHRL	0.334138	10.4109	4.50935	7.96614e-05	0.0017292
seq.13936.24	PGK2	-0.433413	9.70243	-4.51034	7.99294e-05	0.00172938
seq.11425.31	RUFY1	-0.521838	12.3025	-4.5026	8.12344e-05	0.00175193
seq.14098.28	CARS1	0.921559	12.1394	4.50407	8.15584e-05	0.00175324
seq.7921.65	FJX1	0.32501	10.8573	4.49553	8.29136e-05	0.00177664
seq.9187.2	HMGN1	0.740415	10.7405	4.49383	8.40062e-05	0.00178855
seq.21322.60	GTF2E2	0.474848	9.75412	4.49384	8.40036e-05	0.00178855
seq.16773.29	SCUBE3	0.586865	8.20961	4.49116	8.46568e-05	0.00179666
seq.18398.1	AKR1D1	0.324435	8.72801	4.485	8.58127e-05	0.00181541
seq.13452.113	SMIM13	0.180569	9.80585	4.48007	8.6706e-05	0.00182851
seq.20237.38	OAT	0.328007	9.7695	4.47297	8.8504e-05	0.001851
seq.7246.4	FREM2	0.188167	9.08012	4.47149	8.88837e-05	0.001851
seq.9767.22	RIPPLY1	0.153808	9.30412	4.47344	8.83832e-05	0.001851
seq.15514.26	BCHE	-0.580381	12.9463	-4.47222	8.8696e-05	0.001851
seq.12554.10	RAD51D	-0.847174	11.1755	-4.47146	8.96103e-05	0.00186032
seq.18340.2	PSMB4	0.288606	10.438	4.46717	9.00006e-05	0.00186262
seq.2783.18	CCL3L1	0.464009	11.0776	4.46375	9.09245e-05	0.00187592
seq.4397.26	IFNL2	0.228225	9.01387	4.45941	9.20424e-05	0.00189136
seq.4140.3	IL7	0.195058	7.90832	4.45866	9.22409e-05	0.00189136
seq.11319.106	MRE11	-0.753489	11.7147	-4.45834	9.28737e-05	0.0018985
seq.7743.5	TIMM50	-0.470961	9.0597	-4.45355	9.43623e-05	0.00192303
seq.10499.1	TMEM106A	-0.436742	8.89655	-4.44741	9.60486e-05	0.0019455
seq.6472.40	PMEL	-0.714973	11.9813	-4.44713	9.57899e-05	0.0019455
seq.8569.147	ARL8B	-0.206629	10.0226	-4.44055	9.71944e-05	0.00196274
seq.7152.5	HAVCR2	0.355979	11.7624	4.43795	9.79264e-05	0.00197155
seq.25486.38	MRPL38	-0.386071	9.23323	-4.43537	9.92185e-05	0.00197236
seq.25094.9	ACSS2	-0.451781	12.4324	-4.43451	9.89041e-05	0.00197236
seq.3340.53	THBS4	-0.517485	14.5073	-4.43325	9.92641e-05	0.00197236
seq.19803.34	RBP2	-0.621922	11.3892	-4.43319	9.97427e-05	0.00197236
seq.9952.57	TFAM	-1.59407	13.9793	-4.43475	9.96186e-05	0.00197236
seq.17333.20	ACADM	-1.64463	10.4787	-4.43639	9.91498e-05	0.00197236
seq.13377.3	CYB561D1	0.286694	11.4481	4.42874	0.000100566	0.00197772
seq.21817.5	MYL9	-1.17837	14.399	-4.43132	0.000100608	0.00197772
seq.4916.2	IGHD	2.36485	13.2286	4.42865	0.000101384	0.00198713
seq.8352.26	SIGLEC12	-0.468904	11.388	-4.42125	0.000102762	0.00199882
seq.3220.40	RET	-0.566767	11.2923	-4.42188	0.000102881	0.00199882
seq.19373.3	MYL12A	-1.16711	12.6301	-4.42507	0.000102437	0.00199882
seq.4867.15	VEGFA	0.732654	9.72141	4.42224	0.000103276	0.00200066
seq.10391.1	ANGPTL3	0.520267	10.6201	4.41871	0.000104004	0.00200893
seq.6918.183	CCK	0.467416	10.7548	4.41553	0.000104674	0.00201603
seq.14125.5	APOM	-0.315005	9.50572	-4.40998	0.000106245	0.00204039
seq.12700.9	ACLY	-0.302413	10.6734	-4.40533	0.000107592	0.00206032
seq.23148.100	LIPG	0.617415	10.923	4.40697	0.000107917	0.00206063
seq.8289.8	GPNMB	-0.366683	9.86732	-4.39582	0.000110868	0.00211093
seq.5468.67	IL17RC	0.164842	9.5691	4.39335	0.000111375	0.00211454
seq.2949.6	PLA2G10	0.310649	10.2857	4.38911	0.000112744	0.00213445
seq.9875.107	THOC1	0.260575	10.4051	4.38681	0.000113492	0.00213857
seq.17823.40	SNRPD2	-0.394323	11.0516	-4.3855	0.000113924	0.00213857
seq.24920.6	GLS	-0.629259	9.633	-4.38823	0.000113899	0.00213857
seq.22773.69	SDHB	-0.765184	11.6265	-4.38579	0.0001147	0.00214708
seq.23173.3	TIMP1	0.530028	13.2267	4.3779	0.000116444	0.00216152
seq.7117.21	SERPINI2	0.211092	9.37143	4.37837	0.000116287	0.00216152
seq.19574.5	ITGA2B	-1.40247	13.9234	-4.38219	0.000115893	0.00216152
seq.3446.7	IL18R1	0.440648	12.7918	4.36939	0.000119334	0.00219274
seq.18208.3	CCNB2	0.362545	11.4787	4.36997	0.000119136	0.00219274
seq.10054.3	GAN	-0.236616	8.88248	-4.36908	0.000119442	0.00219274
seq.20561.15	CNTN6	-0.913521	11.255	-4.37249	0.000119173	0.00219274
seq.2637.77	MRC1	0.519887	12.3888	4.36583	0.000120563	0.00220722
seq.20575.82	CLEC9A	-0.369871	9.08044	-4.36631	0.000121072	0.00221048
seq.19286.30	MYL5	0.179451	10.0316	4.35859	0.000123103	0.00224141
seq.5682.13	VASN	-0.359649	10.8125	-4.35447	0.000124571	0.00226196
seq.8804.39	COL20A1	0.171479	6.82246	4.35313	0.000125054	0.00226457
seq.2644.11	PRKCA	-1.69657	14.9651	-4.35414	0.000125628	0.00226879
seq.5604.30	HPSE	0.490314	9.74085	4.3511	0.000126728	0.00228247
seq.17739.1	HADH	-1.77796	14.3468	-4.34822	0.000127784	0.00229529
seq.18301.10	NAIF1	-0.704561	12.3313	-4.34176	0.000129447	0.00231891
seq.14337.1	TRAPPC3	0.349619	10.3863	4.34	0.000129865	0.00232017
seq.5646.20	RNASE6	0.412391	11.4056	4.32712	0.000134767	0.00240131
seq.3521.16	CGA	0.75895	10.2624	4.32801	0.000135415	0.00240641
seq.19303.64	PET117	0.22471	9.57359	4.32186	0.00013682	0.00242492
seq.25265.8	FNBP1	1.0121	11.0863	4.32322	0.00013729	0.0024268
seq.23588.9	HSDL2	-0.712745	13.096	-4.31781	0.000138421	0.00244031
seq.10521.10	MXRA8	-0.456985	9.22466	-4.31689	0.000139807	0.00245824
seq.22414.127	TLK1	-0.804357	10.6339	-4.31449	0.000140771	0.00246868
seq.21698.11	ITGA11	-0.423224	9.80287	-4.31258	0.000141278	0.00247107
seq.16885.49	MAPRE3	-0.615209	16.2345	-4.30671	0.000142907	0.00248003
seq.23620.16	RCSD1	-0.879749	10.5867	-4.30952	0.000142794	0.00248003
seq.9531.24	LST1	-0.90088	11.8949	-4.30939	0.000142847	0.00248003
seq.3311.27	FCGR3B	0.600003	11.9629	4.30324	0.000144338	0.00249837
seq.8890.9	TMEM132B	0.592837	12.5216	4.29863	0.000146262	0.0025251
seq.10513.13	KCNIP3	-0.532532	10.4717	-4.29813	0.000147255	0.00253568
seq.3327.27	NTN4	0.394602	12.5588	4.29308	0.000148609	0.00254373
seq.23638.3	CARNMT1	0.263805	9.49293	4.29368	0.000148355	0.00254373
seq.23408.1	SNX16	-0.570554	9.92979	-4.29499	0.000148868	0.00254373
seq.7016.12	GCNT1	0.200442	9.92336	4.28579	0.000151751	0.00256897
seq.12355.223	MRRF	-0.233777	11.3289	-4.28548	0.000151887	0.00256897
seq.7955.195	ITIH1	-0.378731	15.1515	-4.28676	0.000151331	0.00256897
seq.25444.29	INPP5A	-1.5341	14.2266	-4.28998	0.00015102	0.00256897
seq.4143.74	XCL1	0.190018	9.68556	4.27855	0.000154934	0.00260343
seq.8660.33	OLFML3	-0.72591	13.3204	-4.27954	0.000154497	0.00260343
seq.21378.7	PNPT1	-1.8643	12.5357	-4.28068	0.000155096	0.00260343
seq.8261.51	STOM	0.18778	10.2326	4.27677	0.000155728	0.00260746
seq.2732.58	NANOG	0.230039	8.20658	4.26946	0.000159027	0.00265192
seq.24676.105	CFAP298	-0.436063	9.96583	-4.27117	0.000159179	0.00265192
seq.14132.21	HHLA2	0.335617	9.45853	4.26851	0.000159793	0.00265551
seq.7991.54	IQCF1	-0.480256	10.8746	-4.25995	0.000163993	0.00271506
seq.5509.7	EGF	-0.751101	11.1966	-4.26077	0.000164191	0.00271506
seq.2579.17	MMP9	1.07533	15.3366	4.25291	0.000167453	0.00276214
seq.12834.3	KCNF1	-0.163831	10.8927	-4.24728	0.000169462	0.00278838
seq.24907.3	PMPCA	-0.357286	11.698	-4.24608	0.000170048	0.00279113
seq.17820.170	MLF1	-0.518745	12.6022	-4.24118	0.000172452	0.00282363
seq.7131.207	TNC	0.515419	11.4656	4.22927	0.000178431	0.00291438
seq.8475.15	MMP7	0.153796	8.94294	4.22784	0.000179162	0.00291916
seq.12707.26	DPYSL3	-0.471845	11.0488	-4.22509	0.00018088	0.00293281
seq.19563.3	SEZ6L	-0.555444	12.4484	-4.22534	0.000180449	0.00293281
seq.4891.50	GCG	0.731363	11.013	4.22028	0.00018434	0.0029449
seq.18831.6	LRIG1	0.512555	10.2917	4.21872	0.000185161	0.0029449
seq.12041.33	HSPA1L	0.35286	9.58488	4.2208	0.000183416	0.0029449
seq.17152.10	KIR2DS4	0.171672	9.55814	4.21928	0.000183606	0.0029449
seq.9836.20	DCK	-0.280315	12.5686	-4.2214	0.000182492	0.0029449
seq.5358.3	OMD	-0.725874	15.5619	-4.2212	0.000182599	0.0029449
seq.10606.34	TOR1AIP1	-0.768445	12.7125	-4.21753	0.000184833	0.0029449
seq.12529.32	FKBP6	-0.820047	12.0474	-4.21945	0.000184648	0.0029449
seq.21350.29	LIN28B	0.22677	8.97193	4.21471	0.000186021	0.00294786
seq.13573.5	ARPC3	-1.21946	13.9819	-4.2167	0.000186232	0.00294786
seq.18895.54	GSTM4	-1.73049	11.0269	-4.21331	0.000188043	0.00296948
seq.17783.9	MMAB	-0.814168	12.1999	-4.20546	0.000191783	0.00302138
seq.7161.25	H6PD	0.55198	12.5976	4.2011	0.000193399	0.00303965
seq.6941.11	SUMF1	0.479025	10.4807	4.19469	0.000197769	0.00310102
seq.21911.17	NDP	0.506949	9.6381	4.1948	0.000198247	0.00310121
seq.17466.72	ACSF2	-1.09514	10.7498	-4.18879	0.000201674	0.00314008
seq.12395.86	DARS2	-1.94675	13.8858	-4.18934	0.000201354	0.00314008
seq.25259.7	CYBC1	0.296843	10.6057	4.17383	0.00020906	0.0032475
seq.4163.5	H2AZ1	0.188732	9.6224	4.165	0.000214396	0.00332265
seq.15606.19	KRT19	0.261439	10.7829	4.16281	0.000215742	0.00333233
seq.7203.125	RFNG	0.225722	11.0383	4.16235	0.000216021	0.00333233
seq.8927.6	None	0.317264	10.3788	4.15924	0.000217946	0.00335425
seq.7009.6	CD72	0.23187	9.88822	4.15643	0.000219703	0.0033735
seq.4962.52	CDNF	-0.274907	10.6213	-4.15434	0.000221016	0.00338586
seq.11476.43	VPS4A	-1.25947	13.6224	-4.15534	0.000221836	0.00339063
seq.25048.30	PACSIN2	2.2321	14.5028	4.15409	0.000222625	0.0033949
seq.4551.72	ADGRG5	0.323961	9.76689	4.14728	0.000225741	0.00341895
seq.6054.6	NXPH3	0.211994	11.0396	4.14734	0.000225468	0.00341895
seq.2877.3	UBE2I	-0.659703	15.2984	-4.14719	0.000225562	0.00341895
seq.7989.5	C1orf226	0.696767	12.5835	4.1429	0.000228437	0.00343186
seq.4769.10	OLFM4	0.301187	8.2563	4.14237	0.000229519	0.00343186
seq.9606.4	NUP210L	0.199257	9.92901	4.14084	0.000229683	0.00343186
seq.13529.39	NAP1L2	-0.240473	10.4054	-4.14192	0.000228978	0.00343186
seq.4543.65	COL23A1	-0.402037	9.95109	-4.1442	0.000228387	0.00343186
seq.11258.41	MADCAM1	-0.667563	11.4971	-4.14373	0.000229049	0.00343186
seq.8043.153	COMP	-0.477907	9.90297	-4.14016	0.000231629	0.00345318
seq.20074.3	LAMA3	0.190886	9.54407	4.13462	0.000233785	0.00347756
seq.4553.65	HDGFL2	0.272103	9.51537	4.12986	0.000236978	0.0035172
seq.13013.41	PRKN	-0.266017	11.51	-4.12773	0.000238421	0.00353075
seq.13992.12	NSF	-0.605128	10.9898	-4.12838	0.000239515	0.00353909
seq.6039.24	CRHBP	0.448052	11.2694	4.11781	0.000245247	0.00360406
seq.6497.10	RS1	-0.28647	11.0455	-4.11787	0.000245207	0.00360406
seq.5018.68	PRDX6	-0.732837	15.3353	-4.1174	0.000245535	0.00360406
seq.7928.183	TPST1	0.557139	12.3411	4.11567	0.000246742	0.00360746
seq.12504.26	LMOD1	0.215704	11.1951	4.11552	0.000246849	0.00360746
seq.12888.18	SAP30	-0.348637	9.64463	-4.10986	0.000251793	0.00367166
seq.2631.50	IL10RB	0.230777	10.6322	4.10493	0.000254398	0.00370154
seq.3329.14	PGLYRP1	1.15031	11.8186	4.10554	0.000255575	0.00371057
seq.3420.21	CA13	-1.4497	14.1556	-4.1041	0.000256619	0.00371763
seq.3178.5	CTSC	0.257311	9.58117	4.09992	0.000258045	0.00373017
seq.3404.51	TPSG1	0.316153	9.05349	4.09897	0.000259662	0.00373803
seq.21160.4	CHMP6	-0.652707	11.797	-4.09897	0.00025971	0.00373803
seq.21925.15	TGFB1	0.223709	10.9464	4.09358	0.000262742	0.0037695
seq.21935.16	UBE2H	-0.287225	10.2216	-4.09319	0.000263028	0.0037695
seq.15525.294	ADH1C	1.16366	10.5913	4.09392	0.000264144	0.00377119
seq.3196.6	HAPLN1	-0.665519	12.5639	-4.09153	0.000264278	0.00377119
seq.23586.32	CTAG1A	0.123002	9.11679	4.08456	0.000269561	0.00383836
seq.14064.21	PGLYRP1	0.206276	8.81502	4.08307	0.000270702	0.00384639
seq.12560.9	NT5C	-0.770306	11.7182	-4.08201	0.000273219	0.00387389
seq.12698.72	KPNA4	-0.85602	11.4003	-4.07721	0.000276959	0.00391028
seq.11634.32	RGS10	-1.12863	15.7869	-4.0777	0.000276576	0.00391028
seq.13517.3	PTCHD3	0.287692	8.92148	4.07384	0.000278277	0.00391231
seq.18319.7	PDHX	-1.33963	11.8058	-4.07593	0.000277964	0.00391231
seq.2635.61	LAYN	0.36844	11.4028	4.0711	0.000280057	0.00392905
seq.3438.10	FSTL3	0.345398	12.1034	4.0697	0.000281169	0.00393637
seq.3067.67	GDF9	0.344349	9.23833	4.0679	0.000283657	0.00395894
seq.20402.11	TRAPPC2	-1.32928	13.0353	-4.06839	0.000283969	0.00395894
seq.2558.51	POMC	0.181013	9.14583	4.06537	0.000284647	0.0039601
seq.12563.2	TNFAIP8	-0.718742	11.5605	-4.06119	0.000289818	0.00402364
seq.20458.22	NDUFA2	-0.574249	9.2978	-4.05528	0.000294708	0.00408302
seq.9266.1	TREM1	0.439127	10.4341	4.05223	0.000296516	0.00409955
seq.9843.5	ACTN1	-1.81069	13.5581	-4.05089	0.000298392	0.00411695
seq.3280.49	ACAN	-0.704171	11.9392	-4.04603	0.000301794	0.00415528
seq.7206.20	FBP1	0.677239	12.7066	4.04015	0.000305795	0.00420168
seq.3844.2	PPIA	-0.69049	16.6457	-4.03703	0.000308462	0.00422961
seq.12625.138	KLHL7	-0.222815	10.4224	-4.02975	0.000314881	0.00430877
seq.3041.55	MRC2	-0.69619	12.4816	-4.02651	0.000318258	0.00433716
seq.18236.3	LGALSL	-1.0544	15.1704	-4.02795	0.000318066	0.00433716
seq.20173.39	CAPN9	0.294025	11.1521	4.02398	0.00032007	0.00434408
seq.19135.5	NT5C3B	-0.436954	10.8243	-4.02523	0.000319682	0.00434408
seq.17384.110	PFKM	-1.12662	13.252	-4.0246	0.000321431	0.0043537
seq.10748.216	PCDHB2	0.310111	9.42981	4.02164	0.000323173	0.0043684
seq.6561.77	IGKV1-5	0.470187	10.9152	4.0172	0.000327351	0.00441592
seq.12514.16	METTL1	0.272031	10.4418	4.0153	0.000328024	0.00441606
seq.23339.46	TCF24	0.197002	9.00902	4.01435	0.000328907	0.00441903
seq.23370.39	KCNAB3	-0.453609	10.2392	-4.01497	0.000330292	0.00442871
seq.4566.24	RSPO2	0.181472	8.52168	4.01175	0.000331338	0.00443381
seq.2853.68	CHEK1	0.236033	9.97273	4.01025	0.000332741	0.00444366
seq.8246.9	PCSK9	0.613924	12.6089	4.00783	0.000335033	0.00445883
seq.25102.23	ELP1	-0.57376	12.4456	-4.00763	0.000335215	0.00445883
seq.2743.5	SHH	0.345831	8.91115	4.00672	0.000337555	0.00448101
seq.3471.49	STK16	0.470123	11.4922	4.00061	0.000341935	0.00452359
seq.14006.36	GNMT	0.227838	10.9458	4.00042	0.000342121	0.00452359
seq.2447.7	PLA2G2E	0.182649	8.65549	3.99625	0.00034617	0.00456807
seq.18166.4	RHOB	-0.453164	10.9272	-3.99241	0.000350916	0.00462155
seq.4141.79	CXCL10	0.558102	10.437	3.99241	0.000352005	0.00462675
seq.8067.21	KCNE3	0.195935	8.63059	3.9865	0.000355841	0.00466797
seq.17450.51	HARS1	1.40731	14.8292	3.98362	0.000360834	0.00470978
seq.5879.51	DCTN2	0.236962	9.72812	3.98056	0.000361856	0.00470978
seq.17680.12	EPHB1	-0.45809	9.39742	-3.98424	0.00036021	0.00470978
seq.22968.9	GAGE2D	-1.32019	11.9791	-3.98312	0.00036135	0.00470978
seq.23693.4	MKNK1	-0.968213	10.8427	-3.98026	0.000364268	0.00472272
seq.21430.4	PLA2G4A	-1.24232	11.8452	-3.98049	0.000364033	0.00472272
seq.10011.65	OCRL	0.279512	11.3161	3.97659	0.000365938	0.00473516
seq.17693.2	SEPTIN6	-0.263608	10.7106	-3.97437	0.000368235	0.00475565
seq.19239.5	ARF1	-0.656319	10.8469	-3.97391	0.000370844	0.00478008
seq.21569.49	STK10	0.423679	11.8908	3.96814	0.00037476	0.00481194
seq.15527.90	DLD	-0.47635	12.8586	-3.96839	0.000374493	0.00481194
seq.11204.80	CXADR	0.261466	11.4032	3.96743	0.000375508	0.00481227
seq.4866.59	NTRK2	-0.551216	13.5255	-3.96015	0.000383299	0.0049027
seq.10668.5	STX4	-1.49115	13.889	-3.95728	0.000388627	0.00496133
seq.15494.11	FGFBP1	0.324766	9.18692	3.95518	0.000390034	0.00496976
seq.13717.15	FCN2	0.628245	14.5793	3.94995	0.000394481	0.00501683
seq.20181.17	ITGA11	0.210907	9.24961	3.94808	0.000396555	0.00502608
seq.17843.30	PPCS	-1.13172	14.111	-3.94996	0.000396716	0.00502608
seq.2950.57	IGFBP4	0.361385	11.8766	3.94162	0.000403834	0.00509444
seq.7947.19	TEPSIN	0.236262	9.32132	3.94149	0.000403984	0.00509444
seq.19122.47	MYL12B	-0.631535	10.1626	-3.94313	0.000404406	0.00509444
seq.3061.61	CTSB	0.33735	10.3618	3.93984	0.00040587	0.00510324
seq.12627.97	ATG7	1.19715	10.8343	3.94023	0.000407709	0.00511671
seq.17468.1	SUFU	0.280081	10.6404	3.93443	0.00041209	0.0051388
seq.3189.61	TMPRSS15	0.193186	8.94508	3.93476	0.000411714	0.0051388
seq.22371.46	FAM110A	-0.718155	11.7549	-3.937	0.000411438	0.0051388
seq.12597.68	ATG5	-0.972752	11.9417	-3.93603	0.000412554	0.0051388
seq.6373.54	DLK1	-0.45545	10.7544	-3.93359	0.000414435	0.0051526
seq.4157.2	F2	1.43944	11.3928	3.93373	0.000415226	0.00515283
seq.20918.28	SNRPC	-0.506109	10.9536	-3.93112	0.000417347	0.00516471
seq.9846.32	ARHGDIB	-0.713788	15.8307	-3.9296	0.000417734	0.00516471
seq.15368.3	BMPER	0.311268	11.0851	3.92366	0.00042477	0.00523229
seq.3806.55	EPHA5	-0.533244	10.1436	-3.92595	0.0004244	0.00523229
seq.15324.58	FTL	1.26825	12.5427	3.92428	0.000426406	0.00524275
seq.19437.61	VEGFA	0.601515	10.2012	3.92342	0.000427428	0.00524546
seq.25910.1	FCGBP	0.438739	12.9514	3.91828	0.000431243	0.00524546
seq.13604.27	NEURL1	0.207356	10.4663	3.91796	0.000431637	0.00524546
seq.7071.23	MAN1B1	0.149097	11.2004	3.91931	0.000430001	0.00524546
seq.3905.62	UBE2N	-0.729116	16.451	-3.91846	0.00043103	0.00524546
seq.11122.97	SPG21	-0.925832	11.1361	-3.91952	0.000432136	0.00524546
seq.9826.135	FHIT	-1.22228	11.2009	-3.92096	0.000430392	0.00524546
seq.9594.30	SLC30A5	-0.777213	10.6488	-3.91853	0.000433342	0.00525053
seq.9526.3	CLPSL1	0.51989	9.4673	3.91618	0.000436202	0.00527559
seq.16322.10	MZB1	0.664145	14.0151	3.91188	0.000439073	0.00530069
seq.13597.20	RAB31	-1.20714	12.7259	-3.91283	0.000440331	0.00530627
seq.7934.11	NDRG4	-0.23863	11.6906	-3.90985	0.000441579	0.0053117
seq.12437.18	ULK3	-0.189872	9.90491	-3.90872	0.00044299	0.00531907
seq.13659.36	ATP13A1	0.316462	15.1591	3.90781	0.000444115	0.005323
seq.8889.5	CCPG1	-0.194032	10.8585	-3.90512	0.000447493	0.00535385
seq.10908.2	GALNT13	-0.317095	10.8247	-3.90108	0.000452591	0.00540514
seq.9241.40	SIRPG	0.181572	9.39193	3.89863	0.000455723	0.00543281
seq.24905.22	EOLA1	-0.466132	9.26279	-3.89978	0.000456748	0.0054353
seq.6289.78	ARHGAP36	0.422693	9.68621	3.89885	0.000457941	0.00543979
seq.3887.90	KPNB1	-1.24632	15.1637	-3.89632	0.00046119	0.00546863
seq.13740.51	FRZB	0.531551	10.7477	3.89308	0.000465402	0.00550877
seq.4144.13	CCL13	0.196056	8.4976	3.88738	0.000470339	0.00555733
seq.9987.30	LRRC25	-0.324552	10.3523	-3.88615	0.000472181	0.00556923
seq.5633.65	LILRB2	0.419739	9.20752	3.88688	0.00047355	0.00557059
seq.25033.194	VCP	-1.20883	15.1982	-3.88657	0.000473968	0.00557059
seq.11638.42	B3GALT2	-0.434918	11.3152	-3.88397	0.000474856	0.00557119
seq.7003.4	GALNT10	0.201299	9.63016	3.88188	0.000477648	0.00558415
seq.5223.59	GCKR	0.160715	9.76263	3.88208	0.000477377	0.00558415
seq.13596.3	RAB27B	-0.634285	13.1145	-3.88064	0.000479311	0.00558415
seq.11105.171	ENO1	-0.726608	14.9437	-3.88071	0.000479216	0.00558415
seq.13501.10	SLC35G2	-0.915361	12.0287	-3.87959	0.000483328	0.00562112
seq.9604.14	CDH11	-0.617791	12.8564	-3.87379	0.000488605	0.00567258
seq.3356.50	CA7	0.197439	7.84191	3.8722	0.000490787	0.00567814
seq.4979.34	DPT	-0.520722	10.8349	-3.87401	0.000490252	0.00567814
seq.14294.61	MBD1	-0.617508	13.016	-3.87	0.000493827	0.0057034
seq.13431.74	SHISAL2A	0.258895	8.3848	3.86603	0.000499618	0.00574483
seq.8280.238	VTN	-0.301538	11.2284	-3.86519	0.000500513	0.00574483
seq.21104.37	UBL5	-0.565651	12.5726	-3.86495	0.000500862	0.00574483
seq.21961.14	CD2AP	-1.02186	12.3603	-3.86818	0.000499009	0.00574483
seq.11241.8	ASL	0.537456	13.0309	3.85897	0.000509312	0.00583171
seq.10959.125	BET1L	0.205722	8.67656	3.85806	0.000510613	0.00583658
seq.4991.12	GPC5	-0.266973	9.65677	-3.85658	0.000512732	0.00585077
seq.18206.18	ADH6	-1.03774	13.1076	-3.85508	0.000517622	0.00589647
seq.10398.110	ANKRD1	0.171896	9.47501	3.85128	0.000520394	0.00591792
seq.2954.56	MMP8	0.311967	12.4597	3.84669	0.000527123	0.00597406
seq.11493.169	DYNLL2	-1.25365	14.3605	-3.84891	0.000526625	0.00597406
seq.25412.53	FXYD6	0.43484	8.38368	3.84503	0.000532364	0.00600832
seq.5749.53	CLPS	0.281799	8.60734	3.84318	0.000533399	0.00600832
seq.8817.29	CENPV	-0.314449	9.52605	-3.84332	0.000533752	0.00600832
seq.15622.13	OPCML	-0.41288	11.238	-3.84367	0.000531587	0.00600832
seq.14205.6	HEXIM2	-1.01477	10.4959	-3.84222	0.000536559	0.00602973
seq.12414.31	YWHAB	-0.994984	13.5145	-3.83688	0.000544607	0.00610987
seq.8389.8	LRRC74A	0.369607	11.9977	3.83427	0.000545744	0.00611234
seq.23560.154	CEP41	-1.46099	11.5216	-3.83269	0.000551017	0.00616104
seq.4568.17	SLITRK5	-0.593331	11.5961	-3.83061	0.000553041	0.00617331
seq.4960.72	ANXA1	-0.678954	15.4334	-3.82856	0.000554516	0.00617942
seq.8257.71	OXT	0.214982	9.95986	3.82641	0.000557856	0.00620627
seq.9786.310	IER3	0.342594	10.8552	3.82495	0.000560139	0.00622127
seq.10445.20	APOM	-0.329726	9.20886	-3.82518	0.000561541	0.00622647
seq.18174.79	PDCD6IP	-0.871261	12.1783	-3.82522	0.000562624	0.00622812
seq.8242.9	CLEC2L	0.118196	8.9166	3.82197	0.000564817	0.00623169
seq.24454.27	MTHFD2L	-0.744573	9.69959	-3.8241	0.000564388	0.00623169
seq.9077.10	MAN1A2	0.267446	12.2531	3.81789	0.000571302	0.00629282
seq.3853.56	MDH1	-0.643724	14.8625	-3.81644	0.000573612	0.00630784
seq.4468.21	SPHK2	-0.15447	9.9024	-3.8116	0.000581406	0.00638302
seq.6571.75	C17orf78	-0.20438	10.4701	-3.81005	0.000583922	0.0063907
seq.12591.27	OPHN1	-1.49153	13.0831	-3.81183	0.000584024	0.0063907
seq.9172.69	MMP8	1.0027	15.8415	3.80778	0.000589683	0.00640894
seq.5675.6	TNC	0.663318	12.6543	3.80781	0.000587893	0.00640894
seq.9870.17	WARS1	0.4253	13.7904	3.80699	0.000588937	0.00640894
seq.7965.25	HBQ1	0.357125	11.9963	3.80604	0.0005905	0.00640894
seq.23575.58	COX19	-1.37235	12.18	-3.81012	0.000586804	0.00640894
seq.4547.59	FLRT1	-0.28443	10.9947	-3.80296	0.000595596	0.00645375
seq.19189.2	USP14	-0.719298	15.5961	-3.80106	0.000598754	0.00647743
seq.5934.1	FTH1	1.23717	12.3821	3.80149	0.000601083	0.00649209
seq.14271.23	RAB6B	-1.40748	14.8147	-3.79929	0.00060478	0.00652145
seq.4137.57	IL25	0.256793	8.73653	3.79682	0.000606102	0.00652514
seq.24435.1	DNM1	-1.71819	14.7281	-3.79749	0.000607807	0.00653295
seq.13411.21	RNF41	-0.266515	10.3695	-3.79361	0.00061131	0.00656001
seq.22793.110	GTF2A2	-0.410863	10.5586	-3.79293	0.000614288	0.00658138
seq.23567.37	GNAQ	-0.441445	11.5826	-3.78936	0.000618599	0.00660173
seq.4306.4	TKT	-0.886027	15.7842	-3.79062	0.000618264	0.00660173
seq.23278.13	MRPL12	-1.38221	13.4098	-3.79084	0.00061916	0.00660173
seq.7127.3	APOA2	0.406073	12.4657	3.78788	0.000621151	0.00661238
seq.2652.15	PLAUR	0.501512	12.8979	3.78588	0.000624625	0.00662842
seq.14061.48	TNFSF11	0.279341	10.733	3.78587	0.000624647	0.00662842
seq.19615.213	NT5C3A	-0.281529	9.62968	-3.78532	0.000625924	0.00663141
seq.14318.1	VPS29	0.751577	12.2634	3.78518	0.00062817	0.00664464
seq.21154.8	CAB39L	-0.911748	12.1649	-3.7844	0.000630354	0.00665718
seq.19553.14	STX1A	-0.419584	11.5426	-3.78133	0.000632589	0.00667021
seq.3394.81	PLK1	0.170224	9.01082	3.77751	0.000639342	0.00673077
seq.4924.32	MMP1	1.08773	15.0164	3.77717	0.000643146	0.00676014
seq.15404.3	IFNA21	0.338264	9.00158	3.77305	0.00065056	0.0068273
seq.2773.50	IL10	0.181142	7.94925	3.76921	0.000654285	0.00684483
seq.11572.4	DNM2	-0.974629	13.0982	-3.77102	0.000654237	0.00684483
seq.3736.60	BMP6	0.213772	10.6414	3.76478	0.000662396	0.00691882
seq.7863.50	PGRMC1	-0.93184	14.0956	-3.76489	0.00066416	0.00692639
seq.21138.2	NPM2	0.308765	8.60257	3.76265	0.000668294	0.00695861
seq.9789.52	SYNE2	-0.966595	12.4893	-3.76259	0.000669727	0.00696265
seq.24968.10	TIAM2	0.186529	9.7278	3.759	0.000673126	0.00698709
seq.16607.78	GSN	-0.317914	16.5083	-3.75813	0.000674744	0.00699299
seq.7210.25	APLP1	-0.826597	11.9285	-3.75879	0.000676831	0.00700373
seq.6382.17	MANBA	-0.430046	12.5517	-3.75284	0.000684738	0.00707457
seq.11672.17	KIF16B	0.326885	12.4219	3.75118	0.000687904	0.00709503
seq.23298.148	THEM4	-1.11623	12.6051	-3.75245	0.000688848	0.00709503
seq.17736.105	APTX	0.210139	10.1217	3.74549	0.000698863	0.00718708
seq.15492.1	CRIM1	0.20275	8.49281	3.74358	0.000702581	0.00721417
seq.5011.11	NAMPT	0.236344	11.2871	3.7424	0.000704875	0.0072266
seq.23326.10	GSTA2	0.580778	12.0585	3.73566	0.000719037	0.00735906
seq.3864.5	RPS7	0.42805	9.89845	3.73505	0.000722886	0.00735906
seq.2381.52	C5	0.27387	14.9089	3.73309	0.000723317	0.00735906
seq.19271.64	GNAI1	-0.479094	10.4172	-3.7357	0.000721574	0.00735906
seq.4188.1	AKR7A2	-1.19368	15.4019	-3.73595	0.000721085	0.00735906
seq.23621.326	TIMM13	0.302778	11.1533	3.72956	0.000730429	0.00741622
seq.6367.66	FMOD	-0.525721	15.3984	-3.7292	0.000731161	0.00741622
seq.5201.50	PDE9A	0.165472	8.44938	3.72697	0.000735694	0.00745086
seq.10907.116	NTM	-0.489975	13.9365	-3.72565	0.000738398	0.00746689
seq.11401.181	RNF146	-0.189629	11.0544	-3.72501	0.000739714	0.00746887
seq.7875.86	PLEK	-0.848963	16.9884	-3.72325	0.000745321	0.0075141
seq.14105.5	SERPINA4	-0.338227	14.9899	-3.71909	0.000751941	0.00755797
seq.23281.29	ARL8A	-1.8076	13.7589	-3.72103	0.000751484	0.00755797
seq.21535.5	AARSD1	0.379227	11.7254	3.71494	0.000760629	0.00758058
seq.12580.7	PSMB5	0.328677	10.4329	3.7165	0.000757731	0.00758058
seq.4557.61	KIRREL3	-0.123647	9.26583	-3.71476	0.000761016	0.00758058
seq.22005.8	PDP1	-0.265901	10.6947	-3.71665	0.000757046	0.00758058
seq.9855.10	RHOA	-0.897823	15.1306	-3.71666	0.000759185	0.00758058
seq.13639.101	USO1	-1.2466	11.4757	-3.71817	0.000757462	0.00758058
seq.21863.11	NUBP2	-0.406756	12.0172	-3.71392	0.000762789	0.0075869
seq.12735.39	CSDE1	-0.345187	10.5567	-3.70895	0.000773721	0.00768417
seq.10042.8	SGK3	-0.339575	10.8281	-3.70789	0.000775636	0.00769172
seq.24407.31	KIF3C	0.408391	11.7117	3.7065	0.000778629	0.00770993
seq.12457.10	ADI1	-0.261602	10.3918	-3.70365	0.00078479	0.0077594
seq.4336.2	SAA1	3.46425	10.7431	3.70331	0.000789224	0.00778819
seq.17161.1	DDOST	-0.700466	11.107	-3.70273	0.000790483	0.00778819
seq.19262.219	ACADVL	-1.84649	13.5819	-3.7024	0.000791207	0.00778819
seq.4150.75	PLG	0.28223	11.0647	3.69984	0.000793107	0.00779321
seq.7082.2	B3GNT6	0.171072	10.3082	3.69848	0.000796085	0.00779321
seq.20428.5	PHOSPHO1	-0.454738	8.91155	-3.7011	0.000794057	0.00779321
seq.4154.57	SELP	-0.473798	15.0104	-3.69834	0.000796395	0.00779321
seq.23649.6	KLHL2	-0.444025	10.1434	-3.69894	0.000798815	0.00780543
seq.9543.131	COG8	0.121044	9.20874	3.69581	0.000801989	0.00782497
seq.21323.2	RWDD1	-1.23341	14.6417	-3.69664	0.00080391	0.00783225
seq.19279.42	RBP1	0.264622	10.5715	3.69252	0.000809305	0.00786977
seq.8758.2	PCDHA7	0.182835	9.58058	3.6921	0.000810256	0.00786977
seq.21219.7	RPAIN	0.16865	9.63151	3.69163	0.000811304	0.00786977
seq.12801.33	IRF2	0.433825	9.75964	3.69122	0.000816031	0.00790411
seq.4209.60	VTA1	-1.25953	15.7333	-3.68964	0.00081959	0.00792706
seq.5091.28	LILRB2	0.605862	13.0632	3.68712	0.00082149	0.00793392
seq.14079.14	IL18R1	0.388019	11.8677	3.68633	0.000823274	0.00793965
seq.24909.40	PLCD1	-0.614989	12.2154	-3.68354	0.00083117	0.00800422
seq.24440.11	KCTD3	0.243373	10.8279	3.6818	0.000833655	0.00801656
seq.4203.50	CFL1	-0.741417	11.1248	-3.68119	0.000838925	0.00803522
seq.5858.6	YWHAZ	-0.778836	17.0745	-3.68002	0.000838841	0.00803522
seq.25043.74	OXCT1	-1.17389	14.5858	-3.68106	0.000839213	0.00803522
seq.13460.4	CHAD	-0.616749	14.7951	-3.67275	0.000854743	0.00817217
seq.20534.6	SCARB1	0.649824	10.8744	3.67026	0.00086459	0.00824853
seq.7948.129	GLTPD2	0.467151	9.49474	3.67	0.000865205	0.00824853
seq.14031.18	FGF7	0.261857	8.39024	3.66457	0.000875906	0.00831487
seq.5014.49	NCK1	-0.383454	10.2977	-3.66577	0.000873752	0.00831487
seq.4775.34	GSN	-0.69809	10.4601	-3.66562	0.000875694	0.00831487
seq.20185.44	DLAT	-0.536428	10.3773	-3.66474	0.000877841	0.00832138
seq.20444.12	TPPP3	-0.48385	11.5291	-3.66215	0.000881087	0.00834029
seq.4569.52	SORCS2	-0.897258	10.1979	-3.66226	0.00088384	0.00835448
seq.12612.37	PSMB1	0.395545	11.3663	3.65956	0.000886398	0.00835495
seq.8403.18	FASN	-1.22207	13.53	-3.66131	0.000886153	0.00835495
seq.5981.6	None	0.196541	8.13053	3.6577	0.000890961	0.0083861
seq.11178.21	SVEP1	0.425679	10.8289	3.65682	0.000894304	0.0084057
seq.19755.38	ATP5IF1	-1.72868	13.6838	-3.65677	0.000897298	0.00842196
seq.3341.33	ABL1	0.151211	8.98733	3.65453	0.000898786	0.00842407
seq.4440.15	FCRL3	0.247632	10.4334	3.65334	0.00090173	0.00843979
seq.9207.60	CRYZL1	0.416542	9.62354	3.64975	0.000914803	0.00846885
seq.6583.67	SERPINA10	0.389806	14.599	3.65102	0.000907516	0.00846885
seq.19242.21	PFDN1	0.273461	10.5206	3.64935	0.000911702	0.00846885
seq.5526.53	TNFRSF18	0.243043	9.8454	3.64855	0.000913723	0.00846885
seq.7199.3	SYN3	0.142865	7.61558	3.64867	0.000913412	0.00846885
seq.19209.6	NFKBIA	-0.428728	9.08259	-3.64967	0.000915002	0.00846885
seq.9764.79	HNRNPF	-0.673786	15.7108	-3.64936	0.000911671	0.00846885
seq.25292.4	CES3	-1.04727	15.8602	-3.65131	0.000910879	0.00846885
seq.21643.8	RPS20	0.471108	10.6997	3.64367	0.000930231	0.00859786
seq.18943.4	PTGR2	0.344138	11.5948	3.64084	0.000933321	0.00861447
seq.17757.86	CAB39	-1.12505	12.6211	-3.64187	0.000934846	0.00861662
seq.20442.12	RCAN3	0.434988	12.4971	3.63726	0.000942545	0.00863028
seq.7224.11	TRAT1	0.22065	9.03933	3.6385	0.000939349	0.00863028
seq.23002.27	NXPH1	0.169049	9.23669	3.63893	0.000938221	0.00863028
seq.19111.10	UBE2M	-0.348	11.1881	-3.63716	0.000942803	0.00863028
seq.12652.37	AHCYL1	-1.08435	12.0269	-3.63944	0.000941106	0.00863028
seq.20197.14	VSNL1	0.30038	10.9363	3.63413	0.000950705	0.00869067
seq.5843.60	EHMT2	-0.262814	10.0257	-3.62842	0.000965749	0.00880709
seq.19161.1	USP15	-0.871865	15.0388	-3.62926	0.000966084	0.00880709
seq.3302.58	CST7	0.36448	9.66199	3.62671	0.00097461	0.00884952
seq.2809.25	ADAMTS4	0.15202	7.74757	3.62506	0.000974722	0.00884952
seq.3055.54	IL4R	0.131781	8.13555	3.62509	0.00097464	0.00884952
seq.4930.21	STC1	0.423087	10.8294	3.62313	0.000982316	0.00889423
seq.21971.47	FLI1	-1.13418	13.0163	-3.62413	0.000981544	0.00889423
seq.5534.49	TNFRSF10B	0.279243	9.58728	3.62147	0.000985466	0.00891065
seq.4280.47	PSMA2	0.269047	9.48203	3.61982	0.000990048	0.00893995
seq.22134.1	ETV4	-0.44574	9.83976	-3.61824	0.000997527	0.00899529
seq.22792.21	WARS2	0.386849	11.1976	3.61528	0.00100127	0.00901685
seq.13628.58	GRB14	0.12941	9.83399	3.61375	0.00100547	0.00903643
seq.18233.10	GOT2	-0.945056	14.1739	-3.61468	0.00100616	0.00903643
seq.7638.30	LMAN2	-0.783327	13.8325	-3.61274	0.00101073	0.00906529
seq.19365.11	BCAT2	-1.08232	11.6017	-3.61279	0.00101255	0.00906938
seq.9580.5	LAMC2	0.481371	11.4946	3.60857	0.00102099	0.00913269
seq.18870.1	CD3E	0.246493	10.4083	3.60681	0.00102481	0.0091546
seq.4217.49	HSD17B10	-1.69705	12.9917	-3.60762	0.00102701	0.00916197
seq.25273.80	CALD1	-0.92028	15.6712	-3.60652	0.00102892	0.00916675
seq.15426.5	NEU1	0.391813	12.203	3.6047	0.00103076	0.00917086
seq.5349.69	DLL1	0.226457	10.755	3.60327	0.00103483	0.00919479
seq.11402.17	KMT2C	0.13167	8.45601	3.60274	0.00103632	0.00919575
seq.11347.9	TALDO1	0.453788	14.46	3.59951	0.00104556	0.00921639
seq.10382.1	ANGPTL3	0.385785	15.7624	3.59998	0.00104419	0.00921639
seq.17356.34	IL1F10	0.204966	9.02768	3.60015	0.0010437	0.00921639
seq.18330.7	PGM2	-0.394071	11.1177	-3.6013	0.0010412	0.00921639
seq.23705.42	CTPS1	-1.22528	14.734	-3.60187	0.0010433	0.00921639
seq.20159.1	NRN1L	0.49982	10.7043	3.59672	0.00105812	0.0093148
seq.18180.58	RTN4IP1	-1.0601	10.6975	-3.59541	0.00106192	0.00933597
seq.23402.147	GDAP1L1	0.195013	11.2	3.58906	0.00107591	0.00944649
seq.5650.9	PDIA6	-1.32347	13.7228	-3.58947	0.00107934	0.00946407
seq.14696.45	TPSB2	0.298121	9.63303	3.58554	0.00108855	0.00953232
seq.23623.48	NUDT11	0.188003	8.61925	3.58385	0.00109141	0.00954479
seq.12634.79	BCAR3	-0.477857	11.3414	-3.58031	0.00110465	0.00964796
seq.5464.52	GRB2	-0.962468	15.6706	-3.5764	0.00111862	0.00975715
seq.8368.102	TNFRSF1B	0.366584	13.0792	3.57349	0.00112279	0.00977818
seq.19194.9	DTD1	-1.03908	15.0464	-3.57466	0.00112396	0.00977818
seq.2981.9	ESAM	-0.237656	11.3311	-3.57254	0.0011257	0.00978055
seq.25042.3	ME2	-1.25527	16.2096	-3.57348	0.00112757	0.00978404
seq.13722.105	C9	0.46315	16.0027	3.56901	0.00113662	0.00982417
seq.8832.55	BST2	0.10078	9.22425	3.56919	0.00113608	0.00982417
seq.13534.20	MYOM2	-0.586481	10.6211	-3.5709	0.00113556	0.00982417
seq.21915.2	OTUD3	0.276377	9.90009	3.56694	0.00114341	0.00986528
seq.12400.25	UBE2T	-0.248985	10.251	-3.56654	0.00114434	0.00986528
seq.2632.5	IL12RB1	0.238352	9.97277	3.56416	0.00115182	0.00990413
seq.11955.1	ARHGAP1	-0.81314	11.2879	-3.56594	0.00115103	0.00990413
seq.8299.66	LILRA4	-0.485877	11.5478	-3.56401	0.00115369	0.00990743
seq.15437.11	RAMP3	0.194168	10.3871	3.56168	0.00115965	0.00994587
seq.13574.50	RND1	0.214825	9.09943	3.55924	0.00116741	0.00999011
seq.9762.14	VASP	-0.50427	16.1582	-3.55911	0.00116781	0.00999011
seq.19511.8	DCUN1D2	0.165284	8.21643	3.55857	0.00116953	0.00999198
seq.17800.33	SCAND1	0.155653	8.81679	3.55628	0.00117689	0.010042
seq.4706.17	EPB41	-0.909628	12.9316	-3.5559	0.00118303	0.0100686
seq.12434.25	IST1	-0.987914	13.3188	-3.5559	0.00118302	0.0100686
seq.19335.2	JPT1	-0.78823	13.0738	-3.55451	0.00118553	0.010077
seq.25296.3	AMOT	-0.425839	9.93179	-3.5531	0.0011921	0.0101199
seq.9201.13	TAGLN2	-0.931383	12.563	-3.55029	0.00120127	0.0101848
seq.9835.16	ALDH1A3	0.677156	12.1848	3.54838	0.00120554	0.010208
seq.17799.9	PGLS	-0.863982	12.3023	-3.54731	0.00121107	0.0102418
seq.3470.1	SELE	0.627382	15.0344	3.54354	0.00121854	0.0102919
seq.4249.64	NME2	-1.12817	15.516	-3.54394	0.00122225	0.0103102
seq.13490.1	MPP6	0.158173	10.6699	3.53749	0.00123881	0.0104367
seq.17205.21	RAB5A	-1.26113	14.4503	-3.53634	0.00124782	0.0104994
seq.3628.3	MAP2K2	0.432603	11.6642	3.53071	0.00126193	0.0106046
seq.23617.15	HYPK	-0.481312	10.904	-3.53103	0.00126451	0.010613
seq.9859.180	SAT1	0.148469	9.92756	3.52895	0.00126799	0.0106154
seq.14332.3	RALA	-0.895116	12.0402	-3.53061	0.00126743	0.0106154
seq.8760.10	DCUN1D5	0.345692	11.2239	3.52691	0.00127505	0.0106494
seq.16850.5	RGS5	0.258344	11.0571	3.52686	0.00127524	0.0106494
seq.17319.1	SELENOH	0.373521	9.57753	3.52744	0.00127841	0.0106625
seq.17514.48	RAB21	-1.06619	15.9794	-3.5268	0.00128064	0.0106677
seq.25219.17	ATP6V1F	-0.801685	12.6937	-3.52419	0.0012884	0.010719
seq.19334.62	TXNDC12	-1.1039	13.9477	-3.52009	0.00130423	0.0108371
seq.21940.12	WNT10B	0.331454	10.9026	3.5135	0.00132245	0.0109748
seq.21883.17	BMP5	0.352704	13.4094	3.51253	0.00132596	0.0109903
seq.3361.26	CD207	0.171232	8.38309	3.51127	0.0013305	0.0110143
seq.7137.8	MSRA	0.22039	9.09486	3.50984	0.00133568	0.0110434
seq.7194.36	NPTN	-0.616822	13.8044	-3.5079	0.00134277	0.0110883
seq.5307.12	F9	0.267037	13.3069	3.50298	0.00136084	0.0112097
seq.19254.125	GMPR	-1.49759	14.8239	-3.50486	0.00135933	0.0112097
seq.3813.3	FYN	-1.5265	14.4506	-3.50288	0.00136665	0.0112437
seq.12530.14	CKS1B	-0.273046	12.4593	-3.50027	0.00137091	0.0112648
seq.14283.12	RAB14	-0.573226	13.0927	-3.49935	0.00137432	0.0112651
seq.12549.33	HPGDS	-0.690051	12.0219	-3.50118	0.00137296	0.0112651
seq.16883.57	RAB4A	-0.605208	12.1885	-3.49818	0.00138177	0.0113122
seq.13375.48	SYNGR3	-0.204815	9.30942	-3.49658	0.00138471	0.0113223
seq.21188.38	RWDD4	-1.20136	12.7722	-3.49694	0.00138887	0.0113424
seq.4429.51	CHST6	0.182844	9.35229	3.49499	0.0013907	0.0113435
seq.10818.36	SMPD1	0.480685	10.185	3.49393	0.00140027	0.0114076
seq.3480.7	DUSP3	-0.58475	10.3436	-3.49199	0.00140765	0.0114475
seq.3392.68	AKT3	-0.959215	16.2138	-3.49129	0.00141032	0.0114475
seq.5475.10	PRKCB	-1.37944	15.9617	-3.49146	0.00140965	0.0114475
seq.2952.75	IGF1	-0.647743	14.7422	-3.48831	0.00141616	0.0114809
seq.24459.15	COPB2	-1.27783	15.5523	-3.48886	0.00141965	0.0114952
seq.21540.73	BIN2	-0.963437	16.7396	-3.48759	0.00142453	0.0115207
seq.25964.12	C1QTNF4	-0.582319	13.022	-3.48191	0.00144098	0.0116256
seq.23312.16	RABL3	-1.07558	10.8558	-3.48338	0.00144088	0.0116256
seq.16583.8	NUDT2	-1.12909	13.8023	-3.4824	0.0014447	0.0116415
seq.2201.17	COL18A1	0.342165	14.3728	3.47844	0.00145458	0.0117069
seq.23571.93	YJU2	0.542956	12.1735	3.4774	0.00145927	0.0117305
seq.12653.13	CSNK1G2	-0.423751	10.1035	-3.47819	0.00146127	0.0117324
seq.6986.17	HS3ST3B1	0.243717	9.88757	3.47463	0.00146968	0.0117575
seq.7841.84	ESAM	-0.320707	13.8679	-3.47505	0.00146803	0.0117575
seq.13572.43	PSMD11	-1.22815	13.6938	-3.47609	0.00146961	0.0117575
seq.21327.12	CYREN	0.208311	8.34377	3.47386	0.00147276	0.0117679
seq.22034.61	ZBTB16	-0.443491	11.9346	-3.47281	0.00147698	0.0117875
seq.14069.61	CA4	-0.231207	10.2222	-3.47224	0.00147927	0.0117917
seq.23403.64	CDC42EP4	0.359169	9.61619	3.47223	0.00148505	0.0118124
seq.21710.16	NLGN4Y	0.152159	8.20719	3.47071	0.00148541	0.0118124
seq.17346.61	FDCSP	0.290564	10.5314	3.46995	0.00148844	0.0118224
seq.14599.18	STAB1	0.244641	10.1006	3.46788	0.00149684	0.0118749
seq.15583.18	FCRLB	0.306172	9.48772	3.46802	0.00149957	0.0118824
seq.5254.69	PDE3A	-0.535713	10.0868	-3.46802	0.00150206	0.0118881
seq.22970.8	GIPC1	-1.10421	12.2627	-3.46687	0.00150675	0.0119106
seq.21166.1	CTDSP1	-1.41671	14.6942	-3.46645	0.00150848	0.0119106
seq.7866.11	DNAJC30	-0.36953	11.6972	-3.46445	0.00151082	0.0119149
seq.16919.1	DBI	-0.502496	13.5087	-3.46321	0.0015159	0.0119409
seq.25960.15	PLS3	0.415042	12.136	3.46133	0.00152362	0.0119734
seq.13392.13	ATP1B1	-0.443424	9.66689	-3.46232	0.00152542	0.0119734
seq.21319.196	MRM1	-0.547088	8.22621	-3.4624	0.00152507	0.0119734
seq.14675.20	EIF4B	-0.785971	14.907	-3.4602	0.00153156	0.0120074
seq.12365.108	RUVBL1	-0.22937	11.2516	-3.45816	0.00153676	0.0120341
seq.13119.26	SERPINA10	0.444278	12.7982	3.45724	0.00154058	0.0120498
seq.21579.35	MYBPC3	0.270036	8.3764	3.45566	0.00155071	0.0121044
seq.3449.58	SERPINA4	-0.34434	14.527	-3.4547	0.00155119	0.0121044
seq.6413.79	LIPK	0.202149	8.94011	3.45186	0.00156318	0.0121639
seq.22027.13	TACC3	-0.273835	11.084	-3.45165	0.00156407	0.0121639
seq.24659.6	DNAJB13	-0.286628	11.0074	-3.45139	0.00156515	0.0121639
seq.9793.145	IGDCC4	-0.523096	10.359	-3.45257	0.00156612	0.0121639
seq.20550.38	NTM	-0.424984	13.2105	-3.44956	0.0015729	0.0122023
seq.23536.14	None	0.164622	8.32308	3.44691	0.00158422	0.0122592
seq.15523.9	ALAD	-0.728279	12.5824	-3.44748	0.00158624	0.0122592
seq.22984.10	EIF4A2	-0.917903	16.1242	-3.44735	0.00158759	0.0122592
seq.21752.10	RHOT1	-1.75099	12.2465	-3.44854	0.00158326	0.0122592
seq.19438.68	SYF2	-0.303622	11.9429	-3.44526	0.00159129	0.0122594
seq.13937.75	CAND1	-0.563354	12.0338	-3.44639	0.00158981	0.0122594
seq.6948.82	FIG4	0.307097	10.0133	3.44475	0.001595	0.0122628
seq.2734.49	NCR2	-0.185159	8.95046	-3.44431	0.00159541	0.0122628
seq.20947.50	DR1	0.465871	11.4325	3.44026	0.00161571	0.0123936
seq.10781.19	CLEC4G	0.299327	12.5553	3.4391	0.00161801	0.0123936
seq.25070.18	MICAL1	-1.05738	12.252	-3.4409	0.00161627	0.0123936
seq.3046.31	RETN	0.484952	14.8538	3.43647	0.00162953	0.0124675
seq.16536.3	HMGA1	0.194447	8.80428	3.43231	0.00164796	0.012594
seq.12682.5	KYAT3	-0.718863	10.331	-3.43244	0.00165357	0.012608
seq.12537.88	PURA	-0.761765	12.1505	-3.43279	0.00165202	0.012608
seq.11245.43	FLNA	-0.962592	16.0836	-3.43148	0.00165784	0.0126261
seq.18338.26	IDH1	-1.0497	15.2901	-3.42965	0.00166604	0.0126741
seq.23396.21	TWF2	-1.02198	13.6294	-3.42914	0.00166834	0.0126771
seq.7054.87	CLEC2D	0.237322	11.6305	3.42678	0.00167275	0.0126961
seq.12957.62	UQCRB	0.16623	8.57338	3.42528	0.00167952	0.0127228
seq.4990.87	GP1BA	-0.234367	10.9464	-3.42501	0.00168073	0.0127228
seq.7695.106	SQSTM1	-0.298682	12.3763	-3.42473	0.00168199	0.0127228
seq.14025.18	TNFRSF9	0.10301	9.23223	3.42361	0.00168707	0.0127323
seq.17744.31	RAB11A	-1.0479	15.5036	-3.42503	0.00168692	0.0127323
seq.19635.69	FGL2	0.384636	10.703	3.4235	0.0016913	0.0127354
seq.9123.18	CBARP	0.129415	9.21036	3.42303	0.00168973	0.0127354
seq.14091.42	CBR3	-0.620043	11.3698	-3.42342	0.00169424	0.0127431
seq.22045.8	SUMO4	-0.507703	11.4045	-3.42176	0.0016993	0.0127668
seq.16914.104	CD14	0.276778	14.3993	3.4198	0.0017045	0.0127864
seq.5275.28	VAV1	-1.19687	14.9604	-3.42091	0.00170575	0.0127864
seq.11307.33	WWP1	-1.07936	13.7349	-3.41907	0.00171422	0.0128355
seq.12820.1	GRAP	-0.239469	11.7751	-3.41479	0.00172768	0.0129217
seq.18242.8	SPA17	0.286233	10.0669	3.41346	0.00173462	0.0129591
seq.4453.83	LRRTM3	0.211688	8.17679	3.41129	0.00174406	0.0130126
seq.23915.18	RAB7A	-0.849348	15.8528	-3.41176	0.00174569	0.0130126
seq.10336.3	STUB1	-0.934871	11.0074	-3.41039	0.00175471	0.0130653
seq.2939.10	ARTN	0.183684	9.83189	3.40775	0.00176074	0.0130934
seq.14067.6	PKP2	-1.47085	12.7052	-3.40876	0.00176243	0.0130934
seq.21939.6	NAE1	-0.990501	13.4817	-3.40754	0.00176825	0.0131074
seq.13621.31	AP2A2	-1.0945	15.6159	-3.40787	0.00176667	0.0131074
seq.16854.17	LSM4	0.386952	11.4438	3.40475	0.00177505	0.0131433
seq.20912.10	PUDP	-0.470085	11.2843	-3.4051	0.00177724	0.0131449
seq.6491.59	KLK15	-0.332843	10.7791	-3.40322	0.001783	0.0131729
seq.3836.51	UFM1	-1.0446	13.6828	-3.40387	0.00178577	0.0131787
seq.8969.49	CD14	0.24195	10.2632	3.40074	0.00179427	0.013183
seq.3758.68	PROC	0.151385	9.40079	3.40125	0.00179183	0.013183
seq.14623.26	SUMO3	-0.828362	14.7478	-3.40165	0.00179381	0.013183
seq.12691.44	SHMT2	-1.36898	14.9605	-3.4026	0.00179188	0.013183
seq.3427.63	CSNK2A1	0.225571	8.76633	3.39936	0.00180163	0.0131859
seq.22797.20	TAF12	0.196463	9.41656	3.39877	0.0018038	0.0131859
seq.20107.11	MYL4	-0.282948	13.7587	-3.39862	0.00180455	0.0131859
seq.10819.108	FBLN1	-0.424241	12.193	-3.39867	0.00180431	0.0131859
seq.9277.16	REG3A	-0.483282	11.6776	-3.40045	0.00179825	0.0131859
seq.12585.39	ERCC1	-0.125554	9.12404	-3.39789	0.00180811	0.0131974
seq.7243.8	IFNB1	0.14759	10.3542	3.39463	0.00182404	0.0132991
seq.22514.12	NKD2	0.153729	10.3341	3.39304	0.00183182	0.0133413
seq.14705.1	VEGFD	0.645502	11.1438	3.39266	0.00184038	0.0133574
seq.3587.53	BMP10	0.320668	11.0695	3.39	0.00184685	0.0133574
seq.21589.80	DPPA4	0.200517	9.2758	3.38976	0.00184807	0.0133574
seq.19225.11	BLNK	0.13873	9.29404	3.39156	0.00183914	0.0133574
seq.3728.52	SCT	0.124359	7.88273	3.39136	0.00184014	0.0133574
seq.11543.84	LIMA1	-0.185474	10.5254	-3.3902	0.00184588	0.0133574
seq.15433.4	SRC	-1.60111	11.6785	-3.3923	0.00184214	0.0133574
seq.4138.25	IL20	-0.314346	8.8946	-3.39015	0.0018528	0.0133771
seq.18830.1	ITLN1	0.437771	11.4218	3.38809	0.00185895	0.0134053
seq.23518.7	FAM151B	-0.390814	9.30343	-3.38856	0.00186072	0.0134053
seq.10546.2	TSPEAR	0.534791	10.4324	3.38787	0.0018642	0.0134158
seq.17396.23	ADH1A	0.540187	11.9971	3.38625	0.00186789	0.0134278
seq.22369.12	DMRTC2	-0.61792	10.4064	-3.3827	0.0018902	0.0135736
seq.9235.3	PLXDC1	0.40622	13.9718	3.38043	0.00189495	0.0135931
seq.11171.25	FLNA	-1.1665	11.4513	-3.38049	0.00190144	0.013625
seq.10025.1	DLD	-0.395817	11.1351	-3.37716	0.00191337	0.0136689
seq.17320.19	AASDHPPT	-1.07578	14.5547	-3.37809	0.00191373	0.0136689
seq.21147.9	FN3K	-1.30773	12.708	-3.3781	0.0019137	0.0136689
seq.5624.66	FOLR3	0.181855	9.44141	3.37569	0.0019192	0.0136933
seq.19287.59	DENR	-0.496898	10.5496	-3.37577	0.00192566	0.0137114
seq.21730.56	USP19	-0.840988	11.4756	-3.3754	0.00192757	0.0137114
seq.13747.9	CA6	-1.10779	11.3946	-3.37534	0.0019279	0.0137114
seq.17746.77	FIS1	-0.455805	11.3402	-3.37431	0.0019303	0.0137138
seq.21339.19	GPT2	0.192051	9.32134	3.37154	0.00194072	0.0137298
seq.12490.92	LAMTOR3	-0.327958	11.0728	-3.37152	0.00194079	0.0137298
seq.20408.11	TOMM20	-0.646366	12.0264	-3.37352	0.00193729	0.0137298
seq.14013.11	TANK	-1.34374	13.0713	-3.37286	0.00194074	0.0137298
seq.3497.13	IFNA2	0.14678	7.03038	3.36919	0.00195296	0.0138012
seq.9348.1	C1RL	0.18079	9.24296	3.36852	0.00195651	0.0138116
seq.9877.28	CRKL	-1.13997	12.5453	-3.36927	0.00195951	0.0138182
seq.4876.32	F9	0.244403	14.083	3.36599	0.00196978	0.0138437
seq.23028.49	SDCBP2	0.243557	9.24851	3.36693	0.00196652	0.0138437
seq.19503.2	SNX3	-0.44273	11.6912	-3.36542	0.00197352	0.0138437
seq.17818.22	SUGT1	-0.836293	16.1168	-3.3665	0.00197127	0.0138437
seq.3397.7	PTPN11	-0.904361	13.8297	-3.36676	0.00197271	0.0138437
seq.6036.78	EPHA10	0.60476	11.9602	3.36538	0.00197722	0.0138467
seq.4719.58	PDIA3	-0.835083	12.5399	-3.36574	0.0019781	0.0138467
seq.19278.19	RAB1B	-1.42955	13.1256	-3.36523	0.00198084	0.0138513
seq.15447.45	SORD	0.496494	13.0037	3.36302	0.00198552	0.0138695
seq.11149.3	TLR1	-0.2644	10.3863	-3.36255	0.00198803	0.0138725
seq.11449.22	CAPZA1	-0.671637	14.3695	-3.36065	0.00199889	0.0139337
seq.12687.2	DECR1	-1.16051	13.9174	-3.36063	0.00200536	0.0139496
seq.12617.2	STK24	-1.23456	15.5072	-3.36097	0.00200352	0.0139496
seq.17808.37	NIT2	-1.04104	12.0232	-3.35879	0.00201527	0.0140039
seq.22113.2	COQ6	0.362962	10.5098	3.35755	0.00201902	0.0140068
seq.18413.24	ARL4D	0.319356	9.01082	3.35793	0.00201989	0.0140068
seq.13624.17	NADK	0.340218	9.56303	3.35705	0.00202466	0.0140177
seq.7181.17	VAPB	0.127798	8.6565	3.35478	0.00202987	0.0140177
seq.12329.21	RPS6KA1	-0.230879	8.66297	-3.35549	0.00202878	0.0140177
seq.9815.5	ARHGAP1	-0.843069	10.6246	-3.35683	0.00202586	0.0140177
seq.23020.18	RGS4	0.402169	10.3091	3.35414	0.0020405	0.0140383
seq.6969.14	WFDC5	0.180865	8.95801	3.35366	0.00203596	0.0140383
seq.8239.223	BCHE	-0.497775	15.7321	-3.35339	0.00203742	0.0140383
seq.13963.7	TOLLIP	-1.28931	15.094	-3.35399	0.00204129	0.0140383
seq.16596.25	GLRX3	-0.998361	14.7016	-3.353	0.00204672	0.0140612
seq.18878.15	GREM1	0.167781	9.83117	3.35068	0.00205227	0.0140848
seq.17350.13	CHMP2B	-0.959741	14.6824	-3.35	0.00206316	0.0141365
seq.10418.36	STX12	-1.20271	13.8397	-3.34984	0.00206404	0.0141365
seq.3387.1	PAK3	0.455993	10.2778	3.34758	0.00207655	0.0142075
seq.23387.18	TIPRL	-0.809398	15.6677	-3.3448	0.00208912	0.0142789
seq.5870.23	BAD	-1.06788	12.4528	-3.34319	0.00210107	0.0143458
seq.8233.2	ITIH5	0.396284	11.4607	3.34095	0.00210634	0.014349
seq.12389.4	ORC6	0.197563	10.5632	3.3399	0.0021123	0.014349
seq.12372.50	TPM3	-0.211814	8.89058	-3.34002	0.00211226	0.014349
seq.23903.3	GOT2	-1.02467	12.4154	-3.34144	0.00211088	0.014349
seq.3352.80	CA6	-1.25079	11.6991	-3.34196	0.00210797	0.014349
seq.19276.124	SNRPG	-0.526386	11.8313	-3.33996	0.00211615	0.0143605
seq.23200.25	C1QTNF4	-0.545952	12.5784	-3.33697	0.00212918	0.0144342
seq.16621.77	NAXE	-0.458781	12.6616	-3.33649	0.00213165	0.0144363
seq.23246.67	BLOC1S1	-0.656676	10.95	-3.33728	0.00213449	0.0144408
seq.19376.74	NNMT	0.547043	10.1696	3.33527	0.00214598	0.0144482
seq.19317.114	ACP3	0.154857	8.68484	3.33334	0.00214964	0.0144482
seq.18922.27	CD68	-0.358508	11.5382	-3.33528	0.00213852	0.0144482
seq.16769.20	RAC3	-0.571404	10.6677	-3.33606	0.00214142	0.0144482
seq.4541.49	CDON	-0.631298	13.4729	-3.33336	0.00215015	0.0144482
seq.12699.28	CCT8	-1.03782	15.2933	-3.33443	0.00215076	0.0144482
seq.17814.8	BPNT1	-1.06409	14.5029	-3.33463	0.00214961	0.0144482
seq.8042.88	SPINK9	0.331621	9.88822	3.33106	0.00216742	0.0145372
seq.17377.1	AKR1C3	-0.272531	10.2953	-3.33009	0.00216837	0.0145372
seq.12569.25	CCT5	-0.811665	15.2624	-3.32992	0.00217352	0.0145571
seq.21381.73	TBC1D22B	-0.201918	10.6015	-3.32784	0.00218144	0.0145944
seq.19177.7	MOB1B	-1.12977	13.9158	-3.32878	0.00218346	0.0145944
seq.24658.98	CCDC115	-0.237308	9.40881	-3.32422	0.00220451	0.0146909
seq.23318.60	PCTP	-0.591947	11.871	-3.32547	0.00220081	0.0146909
seq.4292.5	NAPA	-1.29173	13.251	-3.32523	0.00220422	0.0146909
seq.15539.15	SLITRK1	-0.553794	11.1659	-3.32311	0.00221667	0.0147424
seq.11140.56	COL1A1	-0.704027	12.7271	-3.32288	0.00221495	0.0147424
seq.19523.215	PARK7	-1.00179	14.7104	-3.32219	0.00222214	0.014764
seq.13451.2	FNDC4	-0.311605	9.94111	-3.31938	0.00223568	0.0148392
seq.20950.159	PRTFDC1	-1.50255	14.7423	-3.31811	0.00224644	0.0148958
seq.21747.114	UBE2N	-0.933858	13.5181	-3.31748	0.0022502	0.0149059
seq.11161.5	SPART	-0.670476	10.4867	-3.31457	0.00226771	0.0150059
seq.5360.9	AKT2	-1.39464	13.7926	-3.31422	0.0022698	0.0150059
seq.6649.51	NTN1	0.118189	8.578	3.31114	0.00228081	0.0150638
seq.10462.14	INSL5	0.450087	9.53613	3.3096	0.00229791	0.0151317
seq.21770.18	B3GAT1	-0.446264	9.29126	-3.31016	0.00229444	0.0151317
seq.9288.7	FKBP7	-0.486181	10.6577	-3.30961	0.00229785	0.0151317
seq.2567.5	CFI	0.250164	15.9472	3.30713	0.00230528	0.0151652
seq.2715.25	EPOR	-0.342521	9.22871	-3.30726	0.00231222	0.0151809
seq.24717.26	PTPA	-0.973737	13.9752	-3.30752	0.00231067	0.0151809
seq.15591.28	GPX1	-0.882666	12.3053	-3.30668	0.0023158	0.0151894
seq.4309.59	TPI1	-1.01916	14.158	-3.30497	0.0023264	0.015244
seq.17682.1	CD46	-0.24252	11.1403	-3.30279	0.00233206	0.0152661
seq.9783.75	DNAJC11	0.181046	10.4229	3.30159	0.00233958	0.0153003
seq.17683.2	COMMD9	-0.800292	11.5753	-3.30241	0.00234225	0.0153027
seq.18458.4	PTGES2	-0.69877	11.7622	-3.30135	0.0023489	0.0153311
seq.13436.54	MAZ	0.144702	9.15773	3.29968	0.00235149	0.015333
seq.11556.19	ARFGAP1	0.272587	10.4122	3.29829	0.00236018	0.0153331
seq.8079.39	EID3	0.174487	8.52306	3.29845	0.00235921	0.0153331
seq.4973.18	BIRC3	-0.246824	8.7621	-3.29823	0.00236516	0.0153331
seq.8002.27	TMPRSS5	-0.260336	9.91201	-3.29775	0.00236531	0.0153331
seq.20516.11	SCN3B	-0.382447	9.31492	-3.29896	0.00236387	0.0153331
seq.24938.7	AP2B1	-1.10876	13.0491	-3.29884	0.00236458	0.0153331
seq.11207.3	MSR1	-0.0936251	9.62128	-3.29515	0.00237998	0.0154132
seq.13622.16	PPP2R5A	-1.00274	15.0909	-3.29593	0.00238294	0.0154174
seq.12714.38	AP1G2	-1.13584	13.4037	-3.29461	0.00239135	0.0154568
seq.12426.19	MOB1A	-0.636874	13.8418	-3.29243	0.00239808	0.0154853
seq.2938.55	APOE	0.314519	16.0588	3.29163	0.00240238	0.015498
seq.6369.82	DEAF1	-0.251139	10.9021	-3.29103	0.00240622	0.0155078
seq.8325.37	ADH4	0.821194	11.4153	3.29165	0.00241021	0.0155185
seq.4987.17	FCAR	-0.206746	10.1107	-3.28899	0.00241931	0.015547
seq.20083.1	RAB6A	-1.42789	13.4581	-3.29053	0.00241736	0.015547
seq.6391.52	LILRA3	0.697475	12.9946	3.28809	0.00242977	0.0155992
seq.17773.26	NAPG	-1.04444	12.5576	-3.28621	0.00244528	0.0156837
seq.6398.12	LONP1	-0.841785	11.6347	-3.2856	0.00244921	0.0156938
seq.3038.9	CXCL11	0.856067	12.6546	3.28418	0.00245847	0.015738
seq.9078.207	SNTB1	-1.32344	13.9202	-3.28319	0.00246494	0.0157643
seq.4240.31	PKM	-0.936144	15.4506	-3.28196	0.00247299	0.0158006
seq.12861.13	TMOD3	-0.923998	15.9822	-3.28042	0.00248309	0.0158348
seq.15534.26	MDH2	-1.3532	15.7497	-3.28076	0.00248087	0.0158348
seq.3831.21	PTEN	0.797649	9.73787	3.27956	0.0024888	0.0158554
seq.21721.6	CHST10	0.148761	10.4777	3.27798	0.00249108	0.0158554
seq.13988.67	NMRAL1	-0.77349	11.2907	-3.27831	0.00249707	0.0158783
seq.10075.75	ACBD6	-1.45747	10.3534	-3.27749	0.0025025	0.0158977
seq.8358.30	PRDX3	-1.38164	13.4271	-3.27617	0.00251129	0.0159383
seq.21369.15	RTCA	-1.12381	15.1131	-3.27076	0.0025475	0.0161528
seq.20087.3	SELENOF	-0.349005	13.2241	-3.26769	0.00256003	0.0162167
seq.8095.213	PPIF	-1.84779	12.3579	-3.26846	0.00256309	0.0162208
seq.7092.7	PDILT	0.206987	9.86556	3.26658	0.00256758	0.0162337
seq.15306.20	JCHAIN	0.194868	9.43121	3.26413	0.00258432	0.0163051
seq.7070.25	KEL	0.192884	8.97068	3.26413	0.00258432	0.0163051
seq.4929.55	SHBG	-0.84237	12.7917	-3.26507	0.00258623	0.0163051
seq.5248.68	PPIF	-1.61127	15.316	-3.26471	0.00258865	0.0163051
seq.19341.36	ACBD6	-0.340937	16.444	-3.26229	0.00259694	0.0163418
seq.24414.3	PYGB	-1.15953	15.3999	-3.2594	0.00262532	0.0165048
seq.13459.30	TOR4A	-0.706116	10.5517	-3.25883	0.00262924	0.0165139
seq.14334.3	RCVRN	0.149087	8.95861	3.25153	0.00267201	0.0167668
seq.6228.58	SPACA1	0.141444	9.36496	3.2507	0.0026779	0.0167879
seq.5384.67	BRF1	0.26047	11.9938	3.24958	0.00268579	0.0167884
seq.16618.7	CD69	-0.710485	8.57307	-3.25047	0.00268807	0.0167884
seq.13535.2	CERT1	-0.944621	11.3251	-3.25063	0.0026869	0.0167884
seq.19274.80	SNTA1	-1.57302	13.0898	-3.25128	0.00268229	0.0167884
seq.24958.3	RFX5	0.420552	10.7668	3.24787	0.00270473	0.0168767
seq.8660.5	OLFML3	0.329014	13.5077	3.24568	0.00271369	0.0169167
seq.3868.8	SGTA	-1.30391	13.2595	-3.24603	0.00271981	0.0169391
seq.21661.82	FAM20C	0.257871	16.0483	3.24301	0.00273287	0.0169907
seq.3299.29	CNTN5	-0.205151	9.3555	-3.24272	0.00273499	0.0169907
seq.2979.8	CXCL5	-0.453056	10.3133	-3.24381	0.00273574	0.0169907
seq.3194.36	GP6	-0.749992	14.3286	-3.24286	0.00273904	0.0169953
seq.12916.3	MTCP1	-0.167938	9.82733	-3.23964	0.00275736	0.017093
seq.12444.39	NR5A2	0.124129	9.19406	3.23777	0.00277103	0.0171619
seq.22125.9	E2F5	0.301763	8.69543	3.23717	0.00278416	0.0172271
seq.4911.49	GSTP1	-0.47885	12.1486	-3.23564	0.00278752	0.0172319
seq.21547.6	FAM20C	0.263869	12.2502	3.23429	0.00279659	0.017272
seq.8428.102	NTM	-0.424762	11.9387	-3.23363	0.00280148	0.0172851
seq.10372.18	STAT6	-1.0366	13.8217	-3.23414	0.0028065	0.0172851
seq.12641.3	INPP5B	-1.68934	13.7454	-3.23418	0.00280623	0.0172851
seq.6504.65	LOXL2	0.196224	8.91352	3.23022	0.00282683	0.0173782
seq.19173.5	ZFAND1	-1.15674	15.3962	-3.23166	0.00282493	0.0173782
seq.2913.1	CCL23	0.745748	10.3463	3.2305	0.00283357	0.0174036
seq.21524.14	USP5	-0.495975	11.4513	-3.22928	0.00284042	0.0174296
seq.7770.25	NFU1	-0.485166	10.1438	-3.22793	0.00285286	0.0174898
seq.9954.2	NPIPB3	0.339836	11.3453	3.22477	0.00286776	0.0175188
seq.8913.22	SIGLEC11	0.284775	11.4061	3.22444	0.00287027	0.0175188
seq.18284.77	WWC1	-0.241737	11.2449	-3.2245	0.0028698	0.0175188
seq.23605.3	TCP11L1	-0.386784	10.2741	-3.22603	0.00286713	0.0175188
seq.8975.26	CNOT9	-1.31867	13.4466	-3.22556	0.00287072	0.0175188
seq.3054.3	HP	1.05782	14.7718	3.22462	0.00287784	0.0175301
seq.13472.35	HDHD2	-1.00449	12.5686	-3.22462	0.00287781	0.0175301
seq.19227.18	BATF	0.163843	9.1739	3.22281	0.0028826	0.017543
seq.11430.49	DTX1	0.36084	11.5481	3.22159	0.00289191	0.0175837
seq.15548.35	PHGDH	0.329912	10.3435	3.21731	0.00293005	0.0177993
seq.22779.75	SMCO1	0.110548	9.3968	3.21591	0.00293558	0.0178167
seq.14047.78	BDNF	-0.737325	13.1518	-3.21621	0.00293867	0.0178192
seq.13681.173	CSNK2A2	0.200405	9.92947	3.21491	0.00294328	0.0178309
seq.21734.36	C1GALT1	-0.298017	12.6243	-3.21352	0.00295413	0.0178642
seq.23187.9	VCPIP1	-1.09749	12.5582	-3.21476	0.00295354	0.0178642
seq.12692.56	DOT1L	-0.265374	8.84035	-3.21396	0.00295685	0.0178644
seq.9202.309	ATP5PO	-1.09891	13.2945	-3.21375	0.00296143	0.0178759
seq.21181.10	LRP2BP	0.244401	10.7122	3.21142	0.00297051	0.0178983
seq.12717.65	TOX3	-0.365897	10.9951	-3.21196	0.0029687	0.0178983
seq.5228.25	KIF23	-0.638677	9.59932	-3.21187	0.00297608	0.0179156
seq.17697.2	OVCA2	-1.13494	13.1509	-3.21028	0.00298856	0.0179745
seq.23264.42	MED10	-0.954444	11.9926	-3.209	0.00299864	0.0180047
seq.13929.27	CROT	-1.02884	10.8004	-3.20896	0.00299899	0.0180047
seq.20390.4	HMGN3	0.303879	8.43136	3.20849	0.00300265	0.0180105
seq.12677.164	FLII	-1.26967	13.4053	-3.2061	0.00302162	0.018108
seq.7122.31	LGR5	0.143557	9.1149	3.20133	0.00305047	0.0182645
seq.21240.6	AMT	-1.26828	12.2538	-3.20136	0.00305948	0.018302
seq.21933.7	UBA7	-1.35489	16.2359	-3.19988	0.00307142	0.0183569
seq.6496.60	DLK1	-0.369963	9.11042	-3.19804	0.00308627	0.0184291
seq.11327.56	CLK2	0.439758	10.3942	3.19683	0.00309615	0.0184631
seq.25922.7	LRP5	0.252392	11.4911	3.19551	0.0030975	0.0184631
seq.3294.55	CFC1	-0.422896	11.4581	-3.19559	0.00310045	0.0184642
seq.4903.72	PPP3CA	-1.04803	15.0258	-3.19575	0.00310489	0.0184741
seq.2443.10	FGF8	0.321346	11.3478	3.19399	0.00310988	0.0184841
seq.9337.43	TAC1	0.244311	8.27128	3.19411	0.00311444	0.0184841
seq.2765.4	GDF11	-0.306717	10.114	-3.19405	0.00311489	0.0184841
seq.4304.18	LCORL	0.164515	8.28606	3.19281	0.00311956	0.0184953
seq.22129.55	ELL3	0.233761	8.97304	3.19125	0.00313604	0.0185648
seq.17675.17	ACOT13	-1.59055	14.4491	-3.19185	0.00313685	0.0185648
seq.21235.11	KPNA5	-1.0804	12.958	-3.19139	0.00314063	0.0185707
seq.2771.35	IGFBP1	-0.796443	14.4757	-3.18937	0.00315358	0.0185977
seq.13474.40	GSTK1	-1.40062	13.4472	-3.19023	0.0031502	0.0185977
seq.3453.87	LYN	-1.52496	15.0947	-3.19003	0.00315187	0.0185977
seq.9340.17	FKBP14	-0.526378	10.6769	-3.18808	0.00316806	0.0186557
seq.25286.33	RABGAP1L	-0.909885	13.2291	-3.18797	0.00316901	0.0186557
seq.11353.143	SMAD2	-0.190048	11.4577	-3.18569	0.00317843	0.0186947
seq.2785.15	CCL8	0.160882	8.07527	3.18409	0.00319179	0.0187072
seq.6984.6	IGSF8	-0.207121	11.0231	-3.18414	0.00319138	0.0187072
seq.22010.36	PRKRA	-0.864865	11.2827	-3.18618	0.00318392	0.0187072
seq.15322.35	CRADD	-0.865648	12.07	-3.18565	0.00318836	0.0187072
seq.23558.33	METTL2B	1.00981	10.6754	3.1835	0.00320631	0.0187428
seq.15574.37	CCNA2	0.148888	9.93868	3.18237	0.00320623	0.0187428
seq.2870.29	RAC1	-1.24973	15.0111	-3.18365	0.00320506	0.0187428
seq.7780.34	MZB1	0.381344	10.6392	3.17836	0.003246	0.0187447
seq.9321.400	NMB	0.243396	10.121	3.17901	0.00323463	0.0187447
seq.18890.227	FGB	0.195278	10.7865	3.17904	0.00323442	0.0187447
seq.20393.10	PDE6H	-0.232768	11.007	-3.18162	0.0032126	0.0187447
seq.5532.53	FGFR1	-0.290296	9.58244	-3.1794	0.00323849	0.0187447
seq.8901.40	YWHAG	-0.743036	15.96	-3.17855	0.00324423	0.0187447
seq.13242.134	SHANK3	-0.749927	11.2081	-3.17897	0.00324461	0.0187447
seq.3874.8	UBE2L3	-0.756215	11.6132	-3.18155	0.00322281	0.0187447
seq.11458.30	PCBP1	-0.76474	16.0972	-3.17902	0.00324036	0.0187447
seq.12449.16	PPIH	-0.810038	12.0369	-3.17996	0.00323627	0.0187447
seq.19258.24	GCDH	-0.881573	10.284	-3.17983	0.00323737	0.0187447
seq.24468.36	ADD2	-0.908619	11.9135	-3.17982	0.00323739	0.0187447
seq.14107.1	MTHFS	-1.15045	14.6893	-3.18158	0.00322256	0.0187447
seq.19229.92	HOMER1	-1.33893	11.6793	-3.18169	0.00322163	0.0187447
seq.2654.19	TNFRSF1A	0.433313	13.5665	3.17698	0.00325189	0.0187624
seq.7233.73	P2RX6	0.150765	9.89792	3.17665	0.00325474	0.0187626
seq.6434.18	AOC2	-0.435686	9.96869	-3.17613	0.00326886	0.0188181
seq.23366.15	UBL7	-0.926256	10.9738	-3.176	0.00327001	0.0188181
seq.17490.4	SH3BGRL3	-1.1464	11.9684	-3.1756	0.0032734	0.0188213
seq.16851.50	SCO2	-0.865217	9.37133	-3.17512	0.00327758	0.0188291
seq.24211.25	HMGCL	-1.06515	11.086	-3.17443	0.00328349	0.0188469
seq.25414.11	LCE3B	-0.357663	9.86723	-3.17312	0.00329475	0.0188952
seq.8970.9	RIPK2	-0.401042	10.5913	-3.17125	0.00331094	0.0189717
seq.15446.25	NRG1	0.294575	12.2237	3.1685	0.003325	0.0190196
seq.7267.2	SPTLC2	0.277816	10.1384	3.16927	0.00332215	0.0190196
seq.18222.34	SH3GLB2	-1.16283	13.3213	-3.16855	0.00333445	0.0190573
seq.21383.37	NARS1	-0.816751	15.2674	-3.16712	0.00334439	0.0190977
seq.2668.70	CAPN1	-0.872742	15.1757	-3.16556	0.00336057	0.0191573
seq.11615.16	DAPP1	-1.28686	15.8834	-3.16585	0.00335807	0.0191573
seq.2607.54	CRLF1	0.144728	9.27896	3.16254	0.00337737	0.0192366
seq.19188.21	NAP1L4	-1.35181	14.36	-3.16305	0.00338273	0.0192506
seq.14041.13	GZMB	0.218647	9.95841	3.16141	0.00338734	0.0192535
seq.2942.50	CYCS	-0.312582	10.9771	-3.16122	0.00338901	0.0192535
seq.20535.68	IL17RE	0.523368	10.61	3.16182	0.00339364	0.0192634
seq.13032.1	BECN1	0.0984893	8.46681	3.15994	0.00340038	0.0192661
seq.17325.10	GUK1	-0.928004	14.5731	-3.16047	0.00340569	0.0192661
seq.22381.1	LACTB2	-1.11794	14.4075	-3.1605	0.00340542	0.0192661
seq.19371.18	MAPRE1	-1.14453	14.6286	-3.16143	0.00339713	0.0192661
seq.22504.3	N4BP2L2	-0.592133	9.23856	-3.15969	0.00341259	0.0192888
seq.4254.6	NUDCD3	-0.389111	9.99761	-3.15933	0.00341579	0.0192905
seq.12786.61	GPCPD1	-0.552137	10.1535	-3.15719	0.00343499	0.0193825
seq.9753.17	EZR	-0.865613	15.5492	-3.15656	0.00344064	0.019398
seq.22576.1	CD209	-0.237689	10.7762	-3.15286	0.00346398	0.0195131
seq.10575.31	PUF60	0.335248	12.867	3.15052	0.00348527	0.0195833
seq.24486.1	BCL11A	0.276263	10.2932	3.15084	0.0034848	0.0195833
seq.8946.38	NR1H4	0.179005	10.2107	3.15056	0.00348484	0.0195833
seq.20527.47	SEMA5B	0.52945	9.91841	3.15027	0.00349767	0.0196288
seq.13959.7	LAP3	-1.02724	15.3054	-3.15009	0.00349925	0.0196288
seq.2603.61	CD80	0.198264	10.1858	3.14847	0.00350396	0.0196387
seq.21115.48	BCDIN3D	0.76243	13.9344	3.14616	0.00353128	0.0197627
seq.4471.50	TGM3	0.245289	8.42898	3.14572	0.00353492	0.0197627
seq.8393.121	CTSF	0.141061	9.19549	3.14504	0.00353551	0.0197627
seq.11263.57	CASQ1	-0.262199	12.9032	-3.14478	0.00353795	0.0197627
seq.8900.28	NEO1	-0.349957	12.2424	-3.14439	0.00354157	0.0197664
seq.22120.4	DCAF11	-0.191168	10.6675	-3.14241	0.00355985	0.0198477
seq.10053.5	ILK	-0.956698	14.1182	-3.14295	0.00356509	0.0198477
seq.5245.40	PRKAA2	-1.57871	14.1083	-3.14301	0.00356453	0.0198477
seq.20976.19	LSM3	-0.73984	11.9373	-3.14158	0.00357792	0.0199025
seq.24901.4	VIL1	-1.54142	13.4127	-3.13974	0.00359509	0.0199814
seq.21592.8	GBA3	0.277374	10.0512	3.13792	0.003606	0.0200086
seq.17856.23	NT5M	-1.2074	10.5646	-3.13858	0.00360597	0.0200086
seq.3867.49	SEZ6L2	-0.70224	10.6768	-3.13485	0.00364125	0.0201874
seq.19267.14	HAGH	-0.576981	15.6409	-3.13147	0.00366299	0.0202911
seq.6621.10	RLN2	0.260515	11.0692	3.12919	0.00368485	0.0203787
seq.23663.28	ATP6V1C1	-1.04386	11.1314	-3.13027	0.00368493	0.0203787
seq.12649.80	MDH2	-1.06809	16.5429	-3.12866	0.00370041	0.0204474
seq.12761.12	APBB2	0.26886	10.4215	3.12479	0.0037278	0.0205345
seq.4124.24	HSPA1A	-0.463345	12.1806	-3.12506	0.00372565	0.0205345
seq.8892.14	PEAR1	-1.24724	13.6747	-3.12629	0.00372327	0.0205345
seq.21763.46	USP4	-1.47372	12.6005	-3.12575	0.00372851	0.0205345
seq.18383.9	FKBP3	-0.709732	16.4541	-3.1236	0.00374476	0.020607
seq.8366.19	C1orf115	0.201671	10.6325	3.12174	0.00375711	0.0206258
seq.3466.8	PRKACA	-1.06891	15.4714	-3.12278	0.00375746	0.0206258
seq.13950.9	CERT1	-1.18291	13.5013	-3.12308	0.00375458	0.0206258
seq.23256.21	TLDC2	0.0953901	8.44593	3.12074	0.00376685	0.0206603
seq.4234.8	IL1RL1	0.779946	11.3928	3.11825	0.00380208	0.0208364
seq.21238.40	CDK5RAP3	0.239616	12.6634	3.11496	0.00382398	0.020922
seq.20923.10	MDP1	-1.04364	13.6885	-3.11633	0.00382108	0.020922
seq.18165.181	UBE2V2	-0.878969	13.0124	-3.11549	0.00382946	0.0209348
seq.20531.5	SLAMF9	0.143944	8.91106	3.11054	0.00386823	0.0211294
seq.2855.49	MAPK3	-0.964764	14.5091	-3.11101	0.00387426	0.021145
seq.3343.1	ACY1	0.494098	11.3631	3.10951	0.00388662	0.0211951
seq.17156.72	DCLK1	-0.410354	11.7089	-3.10527	0.00392265	0.0213567
seq.12675.14	DARS1	-1.05334	16.5792	-3.1065	0.00391992	0.0213567
seq.7826.1	DCLK3	0.129892	9.05893	3.10343	0.00394036	0.0214181
seq.5178.5	PDE7A	0.0977167	8.33128	3.10374	0.00393715	0.0214181
seq.16317.20	DSG3	0.770278	11.2087	3.10346	0.00395095	0.0214406
seq.11591.43	PRC1	0.107195	8.4506	3.10256	0.00394927	0.0214406
seq.15688.30	LMAN1	0.195861	9.04904	3.10177	0.00395784	0.0214606
seq.12632.14	NAT1	-0.29749	10.8745	-3.10048	0.00397068	0.0214795
seq.22041.26	MAP2K5	-0.664603	15.7086	-3.10071	0.00397099	0.0214795
seq.17778.19	RAB32	-1.43531	13.6372	-3.10165	0.00396959	0.0214795
seq.21786.25	CDKL2	-0.540145	12.6762	-3.09998	0.00397852	0.0214853
seq.13930.3	APOBEC3G	-1.00549	12.0716	-3.10104	0.00397592	0.0214853
seq.12993.21	NPLOC4	-1.14157	13.7776	-3.09974	0.00398927	0.0215259
seq.3809.1	FGFR3	0.245578	11.0234	3.09789	0.00399747	0.0215353
seq.7185.29	GP5	-0.35358	16.07	-3.098	0.00399636	0.0215353
seq.6506.54	TMED10	-0.227346	10.6508	-3.09749	0.00400165	0.0215404
seq.3191.50	WFIKKN1	0.260635	9.45602	3.09733	0.00400991	0.0215674
seq.6921.24	B4GALT3	0.17861	10.2281	3.09599	0.00401727	0.0215896
seq.18950.13	RAC2	-1.21098	14.4456	-3.09644	0.00402357	0.021606
seq.20128.1	CREB1	0.197649	8.87906	3.09453	0.00403255	0.0216194
seq.19127.1	HSPB6	-0.405947	12.4082	-3.09458	0.00403198	0.0216194
seq.21926.24	UBE2D1	-1.03483	15.4589	-3.09524	0.00403617	0.0216214
seq.11607.15	BRD1	0.185415	9.10046	3.09314	0.00404712	0.0216304
seq.14005.2	CHD7	0.107772	9.03246	3.0936	0.00404221	0.0216304
seq.12486.8	GLRX2	-0.290754	10.5383	-3.09335	0.00404759	0.0216304
seq.4491.4	IL5RA	0.291275	10.4824	3.09246	0.00405705	0.0216462
seq.6913.189	HMGB2	0.268641	9.16734	3.09305	0.00405468	0.0216462
seq.18297.8	MRAS	0.231436	10.3398	3.09087	0.00407094	0.021703
seq.4128.27	CCL24	0.169025	9.33605	3.08971	0.00408326	0.0217165
seq.5634.39	POFUT1	-0.683033	12.42	-3.09093	0.00408146	0.0217165
seq.7660.21	TPM4	-1.50766	15.5874	-3.09135	0.00407704	0.0217165
seq.22812.4	TRAPPC6B	-0.289981	11.6979	-3.08916	0.00408911	0.0217303
seq.14287.6	RAB5C	-0.962184	14.8293	-3.08973	0.00409425	0.0217403
seq.22383.21	MITF	0.7745	9.12015	3.08714	0.00412173	0.0217994
seq.3518.54	CPB2	0.225349	14.4437	3.08641	0.00411839	0.0217994
seq.5280.68	SLC25A18	0.116093	8.79227	3.08629	0.00411965	0.0217994
seq.5490.53	SPOCK1	-0.285388	11.3685	-3.08693	0.00411284	0.0217994
seq.5601.2	PGLYRP2	-0.523932	14.8831	-3.0861	0.00412162	0.0217994
seq.6904.14	LRRTM2	0.478588	9.86459	3.08604	0.00413358	0.021826
seq.7244.16	IGFLR1	0.326804	11.0684	3.08414	0.00414266	0.021826
seq.13704.5	HMGCS2	0.291893	8.72131	3.08589	0.00413519	0.021826
seq.11421.10	EHD4	-0.319762	11.7729	-3.08419	0.00414211	0.021826
seq.24427.33	INPP4B	-0.597053	11.188	-3.08513	0.0041433	0.021826
seq.15610.72	LAP3	-0.872108	11.499	-3.08484	0.00414642	0.021826
seq.23593.14	MB21D2	0.157593	10.7789	3.08337	0.00415095	0.0218326
seq.23673.9	DBT	-1.023	10.9988	-3.08394	0.00415607	0.0218423
seq.23537.4	SP6	0.214237	11.4758	3.08153	0.00417079	0.0219024
seq.13590.1	REXO2	-0.605626	11.6476	-3.08209	0.00417608	0.0219129
seq.15521.4	CLSTN1	0.219577	11.6024	3.07898	0.00419843	0.0220128
seq.20568.3	FREM1	0.434425	9.9739	3.07808	0.00421958	0.022089
seq.12740.55	FEV	-0.819207	10.5238	-3.07827	0.00421752	0.022089
seq.4130.71	FGF6	-0.461842	9.40292	-3.07461	0.0042576	0.0222197
seq.18387.7	ST13	-0.465033	15.6403	-3.07355	0.00425788	0.0222197
seq.25216.8	S100A8	-0.604964	12.066	-3.07502	0.00425309	0.0222197
seq.11490.42	UBL4A	-0.924957	13.1901	-3.07549	0.00424799	0.0222197
seq.13565.2	RBL2	0.873748	10.7802	3.07207	0.00428564	0.022347
seq.4389.2	DHH	-0.599255	9.65878	-3.07093	0.00429838	0.022396
seq.3897.61	PDXP	-1.10765	12.4749	-3.07028	0.0043056	0.0224161
seq.5882.34	EEF1B2	-0.561633	8.97049	-3.06885	0.00432154	0.0224814
seq.17370.186	ABHD10	-1.30291	11.505	-3.0676	0.00433547	0.0225364
seq.19606.28	IHH	0.223321	10.108	3.06572	0.00434498	0.0225681
seq.12599.10	FERMT3	-0.923971	15.6793	-3.06567	0.00435719	0.0226139
seq.3115.64	MAPK1	-0.921324	11.4744	-3.06391	0.00437706	0.0226994
seq.13541.1	MYCT1	0.250838	10.5861	3.06255	0.00438072	0.0227007
seq.9037.1	STX18	-0.20347	10.158	-3.06139	0.00439388	0.0227512
seq.20430.8	NPPC	0.111575	9.53376	3.05952	0.00441518	0.0228437
seq.21495.134	GPR37	0.484344	11.959	3.05903	0.00442736	0.0228677
seq.7890.68	DPP10	0.144576	9.71336	3.05823	0.00442992	0.0228677
seq.19222.124	RAB5B	-1.08219	15.7076	-3.05924	0.0044301	0.0228677
seq.25085.37	ASPSCR1	-0.756478	13.2127	-3.05891	0.00443384	0.0228693
seq.25437.18	ANKMY2	0.156519	9.99775	3.05757	0.00443752	0.0228706
seq.13960.15	AGAP3	-0.236286	10.4007	-3.05634	0.00445164	0.0229256
seq.24685.12	SNX11	-0.845725	12.8322	-3.0568	0.0044581	0.0229309
seq.5012.67	AK1	-0.862669	14.6287	-3.05667	0.00445955	0.0229309
seq.7909.37	SHBG	-0.600753	16.0034	-3.05432	0.00447594	0.0229975
seq.3042.7	MB	-0.418857	9.96095	-3.05358	0.00449522	0.0230787
seq.13728.19	ERP29	-1.28875	12.5052	-3.0525	0.00450785	0.0231257
seq.8931.124	G0S2	-0.227561	9.07184	-3.05148	0.00451438	0.0231414
seq.7832.181	PDIA3	-1.14841	13.3005	-3.05159	0.00451836	0.023144
seq.4886.3	CCL7	0.239189	9.46566	3.04997	0.00453065	0.0231677
seq.10616.67	PODXL2	0.195117	9.29014	3.04928	0.00453341	0.0231677
seq.10039.32	PNP	-1.21669	12.3965	-3.05082	0.00452739	0.0231677
seq.11257.1	QDPR	-0.586307	12.8978	-3.0491	0.00454013	0.0231842
seq.16915.153	SEMA4A	0.380199	13.6735	3.04658	0.00456521	0.0232774
seq.11328.9	USB1	0.11	8.34131	3.04577	0.00457467	0.0232774
seq.12341.8	DUSP6	-0.169619	11.2539	-3.04538	0.00457933	0.0232774
seq.9326.33	ITIH2	-0.364313	16.3447	-3.046	0.00457195	0.0232774
seq.19148.58	TIMM8A	-0.785632	9.34171	-3.0466	0.00457684	0.0232774
seq.22958.6	DSTN	-1.25917	13.0908	-3.04676	0.00457497	0.0232774
seq.21793.4	CEP43	0.364984	12.7603	3.04311	0.0046062	0.0233783
seq.10012.5	SPDEF	0.293157	11.2171	3.04313	0.00460593	0.0233783
seq.22488.17	KLF9	-0.888517	12.4302	-3.04311	0.00461823	0.0234215
seq.22092.43	CASP4	0.271247	10.6461	3.0414	0.00462651	0.0234457
seq.14129.1	IFNA7	0.192336	9.02106	3.03968	0.00464708	0.023532
seq.21760.22	UBA1	-1.27904	14.8952	-3.03883	0.00466934	0.0236268
seq.20073.22	KRAS	-0.72422	9.19697	-3.03844	0.0046741	0.0236329
seq.7905.30	HP	0.747829	15.5111	3.03603	0.00469771	0.0237163
seq.8274.64	STX7	-0.765695	14.6347	-3.03634	0.00469449	0.0237163
seq.3364.76	CTSV	0.361733	10.2694	3.03559	0.00470844	0.0237525
seq.2997.8	JAM2	-0.222172	12.852	-3.03383	0.00471767	0.0237631
seq.15474.7	PIN1	-1.16195	13.726	-3.03511	0.00471422	0.0237631
seq.22118.7	CSAG2	0.221336	9.47489	3.03232	0.00473905	0.0238527
seq.11104.13	CHI3L1	1.07827	13.7262	3.03079	0.00476689	0.0239747
seq.11083.23	ENO2	0.206828	8.75974	3.02803	0.00479197	0.0240465
seq.6404.20	C1QL1	0.2067	9.9669	3.02807	0.0047881	0.0240465
seq.3848.14	GAPDH	-1.13512	12.8477	-3.02901	0.00478884	0.0240465
seq.12374.8	PAFAH1B3	-0.772393	12.7417	-3.02839	0.00479644	0.0240508
seq.5744.12	MENT	-0.548065	11.0566	-3.02731	0.00480978	0.0240995
seq.8894.80	HNRNPAB	-0.560039	12.2287	-3.02583	0.00482315	0.0241484
seq.11441.11	PYGL	-0.42288	14.5805	-3.02451	0.00483214	0.0241752
seq.21445.40	NEDD8	-0.722846	14.7104	-3.02431	0.00484196	0.0242043
seq.9929.16	HSD17B7	-0.864623	12.3025	-3.02445	0.00484521	0.0242043
seq.4763.31	AFM	-0.29073	14.8312	-3.01956	0.00489396	0.0244295
seq.8074.32	TMEM70	0.415238	8.77484	3.02026	0.00489772	0.0244299
seq.19136.22	ALDH6A1	-1.09801	12.7005	-3.01934	0.00490921	0.024469
seq.3400.49	TBK1	0.145249	9.04335	3.01805	0.00491296	0.0244693
seq.17819.30	FAHD1	-1.34376	12.2653	-3.01814	0.00492437	0.0245079
seq.18407.36	ARL2BP	-0.936796	11.1041	-3.01696	0.00493937	0.0245641
seq.6440.31	MFAP5	0.390206	11.6628	3.01403	0.00496511	0.0246738
seq.21996.28	NUB1	-0.855723	13.7368	-3.01367	0.00498115	0.0247262
seq.20086.5	RAB11B	-1.18079	14.4172	-3.01352	0.0049831	0.0247262
seq.7761.125	CHKB	-0.60709	12.4717	-3.01082	0.00501303	0.0248563
seq.5033.27	TPM1	-0.291911	11.0243	-3.00968	0.00501968	0.0248707
seq.19249.18	KARS1	-0.578618	14.6972	-3.00844	0.0050357	0.0249316
seq.23570.87	ZKSCAN7	0.180931	9.53652	3.00544	0.00507463	0.0251057
seq.24494.67	KATNAL1	-0.376871	10.7291	-3.00505	0.00508912	0.0251587
seq.9283.8	CD44	0.161197	8.50145	3.00151	0.00512608	0.0253226
seq.2573.20	IL6	0.227653	8.64843	3.00153	0.00513325	0.0253251
seq.22973.8	CXCL3	-0.421363	14.5696	-3.00089	0.00513418	0.0253251
seq.23659.2	BZW2	-1.29704	14.4171	-3.00073	0.00514917	0.0253802
seq.8916.32	STIM1	-1.0173	14.7324	-3.00041	0.00515334	0.025382
seq.9121.28	FUT2	0.122751	8.88473	2.998	0.00517229	0.0254411
seq.5698.60	TNXB	-0.384931	13.969	-2.99795	0.00517297	0.0254411
seq.7124.18	IL21	0.330708	10.3281	2.99822	0.00517901	0.025452
seq.24496.26	RILPL1	-0.77619	10.4041	-2.99815	0.00518328	0.0254542
seq.18408.26	ARF4	-0.750472	12.8049	-2.99771	0.0051891	0.0254641
seq.5412.53	CD27	-0.276132	11.6797	-2.99637	0.005194	0.0254693
seq.18224.11	CHMP1A	-1.03311	15.9008	-2.99689	0.00520004	0.0254802
seq.5020.50	PGK1	-0.717694	12.5028	-2.99587	0.00521354	0.0255088
seq.13654.1	ROCK2	-1.36402	11.9424	-2.99603	0.00521144	0.0255088
seq.7223.60	S100A13	1.1307	11.2279	2.99498	0.00522544	0.0255296
seq.4976.57	CRK	-0.66484	13.2487	-2.99477	0.00522309	0.0255296
seq.23426.1	VCX	0.236185	14.2151	2.99198	0.00525265	0.0256437
seq.7886.26	SPTLC1	-0.631173	12.4013	-2.99121	0.00527436	0.0257308
seq.25093.96	VANGL1	0.28559	9.55551	2.99074	0.00527966	0.0257379
seq.6543.182	PRLH	-0.309733	11.1722	-2.98968	0.00528372	0.0257388
seq.25926.29	LDB1	0.144535	9.73371	2.98895	0.00529357	0.025768
seq.12551.3	ITCH	1.17952	11.3453	2.98883	0.00530821	0.0258016
seq.9845.33	PARK7	-0.496494	10.5315	-2.98911	0.0053045	0.0258016
seq.2962.50	PTHLH	0.154755	10.3837	2.98698	0.00532028	0.0258414
seq.19263.147	EIF4E	-0.775048	16.4057	-2.98688	0.00533136	0.0258763
seq.10903.50	STX8	-1.15756	14.2143	-2.98681	0.00533571	0.0258786
seq.11351.233	NHEJ1	-0.74205	9.55637	-2.98621	0.00534397	0.025881
seq.20386.15	PTRHD1	-1.17952	11.4152	-2.98647	0.00534038	0.025881
seq.19329.31	HIPK3	-0.371536	11.4063	-2.98473	0.00535429	0.0259121
seq.11089.7	IGHA1	0.563728	12.0587	2.98471	0.00536	0.0259209
seq.7268.12	IFNA4	0.200975	10.0917	2.98243	0.00538263	0.0260115
seq.6055.53	IFNAR1	0.447794	13.4735	2.98175	0.005392	0.0260235
seq.19366.8	PEX26	0.29408	10.1401	2.98224	0.00539292	0.0260235
seq.24682.35	CYBRD1	0.302826	12.7348	2.97855	0.00543625	0.0261568
seq.11560.76	NFATC4	0.199715	9.45134	2.97879	0.00543393	0.0261568
seq.25308.8	LIMK1	-0.280535	12.6201	-2.97882	0.00543244	0.0261568
seq.7748.11	NDUFV2	-0.364176	11.8902	-2.97872	0.00543382	0.0261568
seq.20943.14	NAA50	-0.969856	14.6145	-2.97885	0.00544538	0.0261818
seq.11659.31	CLINT1	-1.159	15.8389	-2.978	0.0054572	0.0262197
seq.3132.1	VEGFC	-0.313172	10.4354	-2.97388	0.00550937	0.0263914
seq.16907.3	CADM2	-0.411357	10.946	-2.9743	0.00550723	0.0263914
seq.13059.33	RFK	-0.524176	11.4528	-2.97471	0.00550311	0.0263914
seq.14670.1	SKIL	-0.656855	11.6904	-2.97403	0.00551272	0.0263914
seq.12575.30	MTHFD1	-0.916637	14.5293	-2.97487	0.00550086	0.0263914
seq.5703.26	OLFM1	0.303588	8.15509	2.97221	0.00553831	0.0264505
seq.3837.6	ZAP70	0.280338	10.2036	2.97143	0.005542	0.0264505
seq.2649.77	ICAM3	0.222451	10.9199	2.97101	0.00554181	0.0264505
seq.18205.123	MAGEA6	0.134128	9.16653	2.96969	0.00556065	0.0264505
seq.10049.112	TERF1	0.106173	9.49781	2.96917	0.00556803	0.0264505
seq.5094.62	JAML	-0.149377	9.55841	-2.96906	0.00556948	0.0264505
seq.5763.67	DEFB104A	-0.228537	9.89065	-2.97164	0.00553392	0.0264505
seq.9598.23	CSMD1	-0.288954	10.1016	-2.97043	0.0055582	0.0264505
seq.5242.37	MAP2K4	-0.564301	14.3785	-2.97078	0.00554507	0.0264505
seq.15303.63	S100A5	-0.808241	12.018	-2.97012	0.00556792	0.0264505
seq.17513.11	ANXA11	-0.884301	13.1524	-2.97121	0.00555249	0.0264505
seq.18875.125	COL2A1	-1.11067	14.2751	-2.96978	0.0055727	0.0264505
seq.5667.3	SEMA3B	0.141545	9.98103	2.96775	0.00558817	0.0264887
seq.18300.39	PURB	-1.17014	13.7991	-2.96866	0.00558869	0.0264887
seq.8327.26	DPEP2	0.276374	13.7561	2.96702	0.00559859	0.0265167
seq.7110.2	DNAJB11	-0.295652	15.242	-2.9654	0.00562182	0.0265918
seq.4250.23	NSFL1C	-1.12691	12.236	-2.9663	0.00562242	0.0265918
seq.9897.9	MCM6	0.0883257	9.75445	2.96468	0.00563209	0.0266186
seq.23602.35	NAPEPLD	-0.236024	9.68023	-2.96476	0.00563612	0.0266188
seq.19613.16	RDH10	0.23387	10.7709	2.9639	0.00564328	0.0266337
seq.7891.45	UGT1A6	0.205089	9.41841	2.96333	0.00565288	0.0266602
seq.10454.99	DNAJC16	-1.3754	10.8253	-2.96383	0.00565792	0.026665
seq.14021.81	MED4	-0.232961	10.3	-2.96204	0.00567007	0.0266907
seq.12798.46	SLC4A8	-0.251494	9.49762	-2.96196	0.00567938	0.0266907
seq.21747.8	UBE2N	-0.992013	11.7697	-2.9624	0.00567858	0.0266907
seq.21437.77	MGMT	-1.03347	14.696	-2.96242	0.00567818	0.0266907
seq.11377.19	ADH7	-0.308783	11.8909	-2.9605	0.00569238	0.0267329
seq.15365.41	ADGRB3	0.176611	9.47163	2.95971	0.00570394	0.0267683
seq.17405.2	UCHL5	-0.613221	11.2165	-2.95984	0.00571571	0.0268047
seq.5452.71	ASGR1	0.343997	11.5081	2.95749	0.00573623	0.0268782
seq.21326.28	TBCC	-0.358563	11.7077	-2.95727	0.00573945	0.0268782
seq.12452.32	KMT5C	0.166968	10.4001	2.95436	0.00578215	0.0270591
seq.19250.50	MYCBP	-1.21197	14.8939	-2.95446	0.00579446	0.0270977
seq.3601.54	CHL1	-0.406427	13.5868	-2.95302	0.00580197	0.0271138
seq.24694.158	SLC9A3R1	-0.757502	15.2189	-2.95332	0.00580773	0.0271167
seq.19277.4	TSTD1	-0.847807	12.5088	-2.95308	0.0058148	0.0271167
seq.18309.18	CS	-1.15548	15.9681	-2.95314	0.0058139	0.0271167
seq.9738.7	FAF2	-1.23026	14.7489	-2.95082	0.00584829	0.0272538
seq.3881.49	DYNLL1	0.151811	9.56226	2.94944	0.00585498	0.027266
seq.11715.1	POU2F1	0.0942354	7.8466	2.94844	0.00586988	0.0273162
seq.4139.71	IL6R	0.258299	11.7842	2.94522	0.00591814	0.0275024
seq.15435.4	PNP	-1.16319	12.5886	-2.94641	0.00591426	0.0275024
seq.4393.3	FGF16	-0.825838	11.8203	-2.94557	0.00592691	0.027524
seq.12546.1	SMTN	-1.13437	13.0668	-2.94524	0.00593183	0.0275277
seq.13986.6	LANCL1	-0.739571	11.1047	-2.94446	0.00594368	0.0275634
seq.10970.3	ART3	-0.399729	10.309	-2.94272	0.00596992	0.0276659
seq.4498.62	NCAM1	-0.389855	13.4434	-2.94087	0.005984	0.0276926
seq.13044.5	TSG101	-1.09546	14.2989	-2.942	0.00598082	0.0276926
seq.8383.20	None	0.158552	9.82772	2.94019	0.00599437	0.0277133
seq.20536.11	ESAM	-0.252935	11.5403	-2.93976	0.00600094	0.0277133
seq.18315.38	RTP4	-1.17882	11.3354	-2.94092	0.00599728	0.0277133
seq.15604.18	MAPK9	-0.848186	13.8935	-2.93822	0.00603846	0.0278672
seq.3181.50	CTSS	0.329294	14.4358	2.93511	0.00607209	0.0280023
seq.16558.2	MYOC	-0.508625	10.7952	-2.93562	0.00607854	0.0280023
seq.8343.224	PAPOLG	-1.27641	11.6698	-2.9355	0.00608033	0.0280023
seq.15394.79	UNC5B	-0.375861	14.0264	-2.9343	0.00608472	0.0280031
seq.11830.48	PTPN11	-0.993931	15.5081	-2.93394	0.00610438	0.0280743
seq.22043.174	HSPA2	-0.413733	12.7215	-2.93167	0.00612536	0.0281135
seq.24669.12	DNAJC5B	-0.441172	14.6611	-2.93131	0.00613095	0.0281135
seq.3390.72	PIK3CA	-0.74031	11.0093	-2.93176	0.0061382	0.0281135
seq.12494.99	GABARAPL2	-0.856263	12.8719	-2.93176	0.00613822	0.0281135
seq.21756.5	UBE2N	-1.06305	13.9693	-2.93249	0.00612697	0.0281135
seq.17764.108	RHOC	-1.18923	14.0565	-2.93284	0.00612152	0.0281135
seq.9918.23	CALB1	0.193141	10.6893	2.93025	0.00614755	0.0281369
seq.8374.5	NGFR	0.380136	11.0253	2.92865	0.0061809	0.0282701
seq.21513.1	CASP7	0.11488	8.94734	2.92758	0.00618931	0.0282891
seq.13966.30	MYOM3	0.276228	11.1105	2.92637	0.00620824	0.0283562
seq.5936.53	TNF	0.189081	9.18256	2.92545	0.00622284	0.0283646
seq.25053.1	DYNC1LI2	-1.23744	13.4173	-2.92682	0.00621553	0.0283646
seq.25081.6	FAM160B1	-1.29459	13.4544	-2.92647	0.00622103	0.0283646
seq.20543.19	DEFB127	0.228234	8.85701	2.92566	0.00622794	0.0283684
seq.8336.267	GRAMD1C	0.131504	10.3845	2.92296	0.00626222	0.0284856
seq.5013.2	CLIC1	-0.861397	15.0294	-2.92387	0.00626214	0.0284856
seq.6651.74	UBB	-0.344096	15.4905	-2.92233	0.00627218	0.0285115
seq.21858.25	SIAH1	-0.251242	10.6161	-2.92095	0.00629419	0.0285726
seq.12469.19	MAPRE1	-0.989375	15.0206	-2.92212	0.00628996	0.0285726
seq.19207.119	ADK	-0.717165	11.5662	-2.9212	0.00630466	0.0286006
seq.6706.18	ALPG	-0.368286	8.44187	-2.92026	0.00631973	0.0286494
seq.12571.14	ARL3	-0.809431	10.911	-2.91946	0.0063325	0.0286878
seq.3315.15	GPC2	0.159327	7.75736	2.91741	0.00635093	0.0287517
seq.18274.2	SERF2	-0.172579	10.7798	-2.91703	0.00635694	0.0287595
seq.24417.22	RABEP1	-1.09072	12.5362	-2.9166	0.00637849	0.0288373
seq.20079.6	PCK2	0.368602	10.8577	2.91586	0.00638462	0.0288455
seq.11265.8	ALDH1A1	0.424531	10.3528	2.91567	0.00639352	0.0288511
seq.4156.74	TGFB2	0.175824	8.80541	2.9147	0.00639452	0.0288511
seq.11157.35	HSPA1A	-0.215482	11.5839	-2.91416	0.00640328	0.0288711
seq.12350.86	ETS2	-0.256089	11.2245	-2.91381	0.00640909	0.0288777
seq.12558.3	UBASH3B	-1.05623	16.1561	-2.9138	0.00642384	0.0289246
seq.12934.1	HERC5	-0.227476	10.6944	-2.9126	0.00642864	0.0289267
seq.18198.51	HBQ1	-0.169563	8.55152	-2.91187	0.0064405	0.0289605
seq.24419.3	MOCOS	0.195657	9.03864	2.90944	0.00648136	0.0291246
seq.8359.149	STK17B	0.131084	9.572	2.90889	0.00648936	0.0291286
seq.21342.25	RGS14	0.123933	9.91447	2.90879	0.006491	0.0291286
seq.6077.63	ADA2	0.673359	13.8315	2.90636	0.00653961	0.029314
seq.20449.72	JOSD1	0.161803	9.66852	2.90574	0.00654111	0.029314
seq.13990.1	PC	0.212497	9.74281	2.90531	0.00654828	0.0293264
seq.3654.27	BMPER	0.179739	8.66344	2.90379	0.00657421	0.0294228
seq.18904.23	CAMK4	0.119842	8.6801	2.90344	0.00657929	0.0294258
seq.11424.4	FAH	0.25886	12.7015	2.90264	0.00659269	0.0294476
seq.14056.4	CGA	0.180517	10.4805	2.90239	0.00659672	0.0294476
seq.5346.24	CPNE1	-1.14167	14.3615	-2.90324	0.00659743	0.0294476
seq.10370.21	STAT1	-0.957085	11.0611	-2.90148	0.00662693	0.0295595
seq.3416.2	BTK	-1.43959	13.7084	-2.90064	0.00664091	0.029602
seq.3797.1	CDH2	0.228033	10.3393	2.89943	0.00664633	0.0296064
seq.23692.19	ACSS3	0.270143	10.339	2.89743	0.00668433	0.0297252
seq.5255.22	PDE4D	0.265957	10.1138	2.89731	0.00668872	0.0297252
seq.22987.69	MAPK9	0.229278	9.50732	2.898	0.00667756	0.0297252
seq.21716.29	FUT7	0.142157	8.71432	2.89678	0.00669085	0.0297252
seq.25100.11	CMIP	-1.42793	12.7068	-2.89722	0.00669847	0.0297392
seq.8369.102	DAG1	0.163009	9.09996	2.8947	0.0067262	0.0298425
seq.20453.9	NSMCE1	0.161334	9.21828	2.89248	0.00676398	0.0299119
seq.24316.10	BMT2	-0.244232	9.80367	-2.89295	0.00676429	0.0299119
seq.9398.30	GALP	-0.348819	9.46904	-2.8935	0.00676158	0.0299119
seq.12708.91	L3MBTL2	-0.590596	10.8763	-2.89422	0.00674927	0.0299119
seq.19113.66	SH3BGRL2	-1.34483	14.4596	-2.89353	0.00676114	0.0299119
seq.12821.6	NLRP10	-0.431072	11.4187	-2.89072	0.0068031	0.0300636
seq.18888.37	FABP12	0.188097	10.4708	2.88968	0.00681187	0.0300824
seq.14206.28	APBB1	0.123597	7.62706	2.88855	0.00683128	0.0301481
seq.5129.12	SCARF1	-0.401222	13.2187	-2.88798	0.00684113	0.030165
seq.12016.60	CBL	-0.902541	15.5208	-2.88868	0.00684416	0.030165
seq.21351.8	GARS1	-0.930123	12.8515	-2.88745	0.00686552	0.0302391
seq.2891.1	CD22	0.169086	10.9515	2.8858	0.00687879	0.0302776
seq.12479.50	PRKAR1B	-0.346966	11.2221	-2.88529	0.00689149	0.0303134
seq.3461.58	BCAN	-0.398392	10.7935	-2.88443	0.00691787	0.0304094
seq.17398.55	HMOX1	0.412946	11.2584	2.88152	0.00696238	0.0305849
seq.6576.1	ART4	0.282236	10.6575	2.87901	0.00700096	0.0307341
seq.19197.95	ACAT1	0.668527	12.5026	2.87771	0.00703587	0.0308671
seq.8264.43	DLL1	0.280412	11.2229	2.87655	0.00704091	0.0308688
seq.18271.43	OXSM	-0.934455	11.1307	-2.87686	0.00705095	0.0308925
seq.10080.9	EIF2B1	-0.830185	10.7121	-2.87614	0.00706362	0.0309277
seq.23629.4	VMAC	-0.208428	9.99287	-2.87391	0.00708783	0.0310133
seq.21178.8	CIAO1	-1.02231	13.297	-2.8741	0.0070999	0.0310457
seq.8447.11	GHRL	0.184314	10.6967	2.87288	0.00710631	0.0310534
seq.15457.14	ANPEP	0.881339	11.7302	2.87249	0.00712875	0.0311311
seq.7773.20	KIR2DL2	0.23118	11.4632	2.87121	0.00713608	0.0311427
seq.25947.116	PIK3C3	-0.523289	10.2844	-2.87116	0.00715269	0.0311947
seq.5481.16	RASA1	-0.756367	10.0751	-2.86998	0.00717392	0.0312668
seq.10037.98	SIGLEC12	-0.215985	8.92173	-2.86905	0.00718364	0.0312683
seq.3855.56	PRDX1	-0.745044	14.9771	-2.86937	0.00718076	0.0312683
seq.7957.2	SCG3	-0.447122	13.3678	-2.86714	0.0072095	0.0313399
seq.7696.3	NBR1	-0.596143	11.4919	-2.86814	0.00720716	0.0313399
seq.18203.9	CRYGC	0.297581	10.0834	2.86698	0.0072218	0.0313525
seq.16060.99	NID2	-0.483486	11.7975	-2.86704	0.00722078	0.0313525
seq.15602.43	IL6R	0.229983	11.5465	2.86616	0.00722722	0.0313556
seq.22824.53	ATP6V1C2	-1.0368	15.0085	-2.86651	0.00723672	0.0313764
seq.20447.11	TGIF2LY	0.15938	8.47422	2.86497	0.00724888	0.0314086
seq.18295.102	GRHPR	-0.449565	11.952	-2.86492	0.00725376	0.0314094
seq.24902.84	GPHN	-0.734582	9.87469	-2.86519	0.00726057	0.0314185
seq.13447.42	SPRN	0.616283	12.2148	2.86313	0.0072982	0.0315143
seq.5034.79	PRSS2	0.596683	10.8628	2.86352	0.0072911	0.0315143
seq.8955.60	GLT8D1	0.15298	10.4697	2.86209	0.00730165	0.0315143
seq.11608.5	MAP1LC3B	-0.849329	14.7784	-2.86269	0.00730636	0.0315143
seq.13477.65	LTB4R	-1.53107	12.9515	-2.86345	0.00729252	0.0315143
seq.3611.70	ECE1	-0.132079	10.4294	-2.86037	0.00733309	0.0316091
seq.22557.68	MRPL50	0.180496	9.90129	2.85901	0.00735833	0.0316821
seq.11431.235	RECQL	-0.536039	13.2961	-2.85873	0.00736506	0.0316821
seq.15312.14	AGO1	-0.659403	12.083	-2.85943	0.00736643	0.0316821
seq.23665.35	PSMC3	-0.755697	12.3381	-2.85928	0.00736904	0.0316821
seq.11214.40	DNAJB9	0.367199	13.9456	2.85706	0.00739441	0.0317329
seq.21001.393	BRK1	0.181874	10.5951	2.85684	0.00739845	0.0317329
seq.8016.19	DNAJC4	0.170702	9.52747	2.85736	0.00738869	0.0317329
seq.6526.77	OBP2A	0.132468	9.96438	2.85674	0.00740026	0.0317329
seq.23224.11	RGN	0.102579	9.25031	2.85637	0.00740722	0.0317329
seq.10073.22	TDP1	-0.175539	10.6138	-2.85625	0.00740941	0.0317329
seq.8382.47	MAPKAPK5	-1.42214	13.3168	-2.85593	0.00743122	0.0318058
seq.13578.98	ABLIM3	-0.899306	10.9628	-2.85526	0.00744372	0.0318389
seq.15449.33	TIMD4	0.492403	9.82453	2.85497	0.00744919	0.0318418
seq.2989.17	IFNG	-0.581805	10.9553	-2.85467	0.00745475	0.0318452
seq.5231.79	PCSK9	0.454299	15.3148	2.85356	0.00745954	0.0318452
seq.20439.14	PLPBP	-0.813833	15.2264	-2.85296	0.00748675	0.0319409
seq.23566.6	APOL2	0.45569	12.916	2.85158	0.0074967	0.0319629
seq.23322.2	MSC	0.295936	12.8056	2.85014	0.00752378	0.032038
seq.12646.2	RPE	-0.829286	10.9854	-2.85098	0.00752392	0.032038
seq.21114.18	DNAJC12	0.218305	8.67441	2.84988	0.00753762	0.0320498
seq.2999.6	LSAMP	-0.290472	10.4077	-2.84954	0.00754412	0.0320498
seq.3057.55	CCN4	-0.310998	12.1121	-2.84897	0.00754594	0.0320498
seq.23257.14	COMMD10	-1.29779	12.1952	-2.85018	0.00753913	0.0320498
seq.3845.51	DYNLRB1	-1.23258	13.6326	-2.84921	0.00755738	0.032078
seq.12659.13	OLA1	-0.934898	12.2632	-2.84798	0.00758081	0.0321569
seq.24223.5	GSTT2	-0.244845	11.1025	-2.84594	0.00760336	0.032232
seq.15569.15	COL2A1	-0.539632	10.8101	-2.84645	0.00760976	0.0322387
seq.6895.1	TFRC	0.819839	11.7394	2.84356	0.00766503	0.0323816
seq.9231.23	BPNT2	-0.365842	10.5807	-2.84388	0.00765889	0.0323816
seq.12662.82	ECH1	-0.422835	10.0931	-2.8439	0.0076585	0.0323816
seq.17802.4	NANS	-0.530808	14.9645	-2.84204	0.00767809	0.0323816
seq.2647.66	GDI2	-0.63444	15.0101	-2.84277	0.00767297	0.0323816
seq.14082.56	TLN2	-0.995917	12.6427	-2.84276	0.00768044	0.0323816
seq.23677.30	NCKIPSD	-1.24477	15.6312	-2.84266	0.00768237	0.0323816
seq.21552.9	ACOX1	-1.32675	14.9463	-2.84333	0.0076695	0.0323816
seq.19150.20	PRPSAP2	-0.727125	15.0415	-2.84137	0.00770297	0.0324393
seq.20929.4	CTDSPL	-1.25818	12.3315	-2.84144	0.00770578	0.0324393
seq.17728.61	CHMP2A	-1.19472	13.2228	-2.84082	0.00771779	0.0324693
seq.10076.1	AP4M1	-0.724525	11.6434	-2.84019	0.00772985	0.0324995
seq.18824.7	EIF4A2	-0.603034	11.5847	-2.83934	0.00774633	0.0325483
seq.21128.2	CDK2	-0.96916	12.345	-2.83861	0.00776042	0.0325869
seq.8367.142	VSIG1	-0.249383	8.36758	-2.83783	0.00777555	0.0326299
seq.25453.57	ROPN1B	-0.148282	10.7491	-2.83655	0.00778417	0.0326455
seq.13955.33	DAPK1	-0.803351	10.7631	-2.83578	0.00781559	0.0327566
seq.22577.24	SIGLEC14	0.701413	12.7528	2.83493	0.0078322	0.0328057
seq.14111.15	THBS2	0.277617	9.26969	2.83397	0.00785104	0.0328639
seq.21217.20	PHB2	0.187509	10.3326	2.83029	0.00790701	0.0329004
seq.18927.14	RAET1G	0.149379	10.1374	2.83061	0.00790068	0.0329004
seq.2760.2	FAM107A	0.105688	8.66399	2.83045	0.0079038	0.0329004
seq.9218.7	FAS	-0.206211	9.26818	-2.83142	0.00789098	0.0329004
seq.6570.1	COL13A1	-0.351828	10.4532	-2.83187	0.00789231	0.0329004
seq.6531.29	FAM162A	-0.483776	9.66994	-2.83277	0.00787458	0.0329004
seq.2846.24	RPS27A	-0.48604	11.9968	-2.83094	0.00790374	0.0329004
seq.19446.1	GMPR2	-0.510511	13.4901	-2.83018	0.00790914	0.0329004
seq.9760.13	MAPK9	-0.914124	12.3275	-2.83251	0.00787971	0.0329004
seq.11683.19	GGA3	-0.997329	13.1426	-2.8317	0.00789564	0.0329004
seq.24689.9	CAVIN1	0.537015	11.1066	2.82917	0.00794558	0.0329902
seq.9932.49	SEMA4F	-0.1979	10.0263	-2.82876	0.00793718	0.0329902
seq.19560.23	PLXNA4	-0.52397	11.2722	-2.82929	0.0079433	0.0329902
seq.4900.8	C3	0.322518	17.373	2.82732	0.0079658	0.033033
seq.23422.47	RFC4	0.230316	9.89301	2.82757	0.00796443	0.033033
seq.20441.35	POLR2E	-0.358171	10.6176	-2.82778	0.00797102	0.0330341
seq.3179.51	CTSA	0.430777	13.8737	2.82663	0.00797954	0.0330489
seq.21345.93	RDH12	-0.698687	11.9602	-2.82718	0.00798519	0.0330517
seq.21123.1	MRPL28	0.125649	8.82849	2.82583	0.0079955	0.0330739
seq.2811.27	ANGPT1	-0.419906	15.7704	-2.82491	0.00801385	0.0331292
seq.12871.10	TWF1	-0.646498	12.0823	-2.82449	0.008039	0.0332126
seq.3815.14	IL12RB2	0.149614	7.83037	2.82256	0.00806112	0.0332833
seq.11382.5	BLVRA	-0.778654	12.4688	-2.82265	0.00807604	0.0333243
seq.16593.3	FADD	0.176595	11.711	2.821	0.00809243	0.0333712
seq.19743.12	VSTM1	0.190448	11.2445	2.8207	0.00809865	0.0333763
seq.13381.49	B4GALT1	0.269512	14.5714	2.82026	0.00810752	0.0333922
seq.9713.67	PDGFRL	0.391079	13.5076	2.8193	0.00812691	0.0334441
seq.20225.119	STAT5A	-0.274929	12.2824	-2.81914	0.00813017	0.0334441
seq.4148.49	PAPPA	0.493437	13.2085	2.81814	0.00815041	0.0335067
seq.17826.341	EEF1D	-0.69703	16.1973	-2.81832	0.00815691	0.0335127
seq.12593.33	PDRG1	-0.715323	12.5974	-2.81774	0.00817549	0.0335684
seq.15470.11	HEXB	0.395193	9.84089	2.81479	0.00823564	0.0337322
seq.6450.8	FABP6	0.180747	8.79913	2.81462	0.00822367	0.0337322
seq.21614.2	GEMIN6	0.147355	10.1604	2.81401	0.00823487	0.0337322
seq.10440.26	CLMP	-0.193583	10.022	-2.81403	0.00823449	0.0337322
seq.6467.65	POGLUT1	-1.20073	12.8759	-2.81412	0.00824935	0.0337469
seq.25298.53	KDM4C	-1.28212	13.3657	-2.81427	0.00824638	0.0337469
seq.10980.11	ACHE	-0.339219	10.8594	-2.81286	0.00826779	0.0338016
seq.8864.59	CENPW	-0.281146	10.5753	-2.80978	0.00832935	0.0340324
seq.18402.1	AMMECR1L	-0.337599	9.39581	-2.80885	0.00835828	0.0341296
seq.20396.70	COMMD6	0.226875	9.98296	2.80784	0.00836375	0.0341311
seq.3074.6	LBP	0.759411	15.4681	2.80797	0.00837375	0.034151
seq.8982.65	THBS3	-0.514494	13.5004	-2.80663	0.00838799	0.0341672
seq.9884.8	PPIL1	-0.59126	8.16744	-2.8076	0.00838431	0.0341672
seq.13482.14	CNOT1	-1.14888	13.4775	-2.80591	0.0084198	0.0342758
seq.21955.36	BAG6	-0.746683	14.3117	-2.80451	0.00844901	0.0343577
seq.13615.60	NCK2	-0.96235	14.4697	-2.80445	0.00845023	0.0343577
seq.19121.3	UBQLN2	-0.598357	13.637	-2.80378	0.00845689	0.0343639
seq.19616.100	EFHD1	0.190667	10.8098	2.80303	0.00846303	0.0343679
seq.19338.3	LZIC	-0.256844	9.89172	-2.80116	0.00851259	0.0345481
seq.11817.1	RPS6KB1	-0.739097	11.0246	-2.80001	0.00854419	0.0346552
seq.5249.31	STK17B	-0.223727	9.8275	-2.7988	0.0085567	0.0346745
seq.12376.85	CDKN2D	-1.03982	12.6905	-2.79929	0.00855936	0.0346745
seq.3221.54	SFRP1	0.277267	9.09528	2.79873	0.00857119	0.0347014
seq.15427.35	LOXL3	-0.533555	12.9035	-2.79733	0.00859049	0.0347584
seq.15364.101	APOC1	-0.223331	17.2683	-2.79592	0.00861399	0.0348323
seq.17804.102	PNPO	-0.322978	10.7909	-2.79557	0.00863179	0.0348831
seq.6909.40	MGAT2	0.305473	10.1421	2.79505	0.00865009	0.0349359
seq.23521.29	NME7	-1.23876	13.2562	-2.79452	0.00866137	0.0349603
seq.11318.20	APOA5	-0.342621	10.7884	-2.7937	0.00867207	0.0349822
seq.9045.3	SLC27A2	-0.202836	9.5677	-2.79215	0.00869678	0.0350607
seq.12800.5	TPPP2	-0.367484	11.9806	-2.79152	0.00870876	0.0350666
seq.19586.89	RAB3C	-1.45751	15.4219	-2.79243	0.0087065	0.0350666
seq.9514.46	EFCAB14	-0.115277	9.92741	-2.78972	0.00874766	0.0352019
seq.19196.73	HOPX	-0.196707	11.1663	-2.78844	0.00877555	0.0352929
seq.11096.57	N6AMT1	-0.488303	12.2455	-2.78825	0.00878943	0.0353274
seq.21967.20	HSD11B1	0.453306	11.9594	2.7873	0.00881019	0.0353517
seq.5508.62	CTSD	0.371484	11.6321	2.78646	0.00882049	0.0353517
seq.11158.40	BICDL1	0.209515	10.0351	2.78607	0.00882731	0.0353517
seq.21544.4	ATL3	-0.435394	10.476	-2.78744	0.00881481	0.0353517
seq.11226.16	UBE3A	-0.726319	13.3075	-2.78708	0.00882282	0.0353517
seq.24472.28	SHARPIN	-0.822953	10.3625	-2.78738	0.00881623	0.0353517
seq.13994.1	FBL	0.267466	12.2073	2.78572	0.00883502	0.0353613
seq.12842.43	STX10	-0.463191	12.6391	-2.78498	0.00885292	0.0354117
seq.25464.1	CYP2C19	0.780417	9.2464	2.78407	0.00888875	0.0355337
seq.23178.95	HNMT	0.24182	10.351	2.78276	0.0089019	0.0355436
seq.18310.26	SELENOW	-0.561376	12.1808	-2.7835	0.00890126	0.0355436
seq.16620.26	LY75	-0.321073	12.8305	-2.78179	0.00892143	0.0356002
seq.4153.11	SERPINA3	0.512816	14.9443	2.78032	0.00895396	0.0357087
seq.25267.10	HSPA12A	0.219165	13.2878	2.77876	0.00898867	0.0357337
seq.20557.19	VSIG8	0.202256	7.72526	2.77984	0.00897279	0.0357337
seq.6410.26	INSL4	0.113443	8.4492	2.77903	0.00898282	0.0357337
seq.19147.6	LGALS13	-0.115315	10.6615	-2.77906	0.00898213	0.0357337
seq.13236.25	WNT3A	-0.450546	12.4054	-2.77952	0.00897541	0.0357337
seq.21628.6	EEF1E1	-0.475682	10.0735	-2.77939	0.0089924	0.0357337
seq.4907.56	FGA	0.261736	14.0288	2.77813	0.00900269	0.0357532
seq.18925.24	PSMA5	0.336405	11.9243	2.77757	0.00901517	0.0357602
seq.25059.18	HDAC6	-0.23294	10.7668	-2.7776	0.0090146	0.0357602
seq.13985.12	SMURF2	-0.153739	9.9911	-2.7768	0.00903242	0.0358073
seq.2982.82	LGALS4	-0.213843	9.80501	-2.77562	0.00906325	0.0359082
seq.16057.6	IGF2R	0.270754	12.9892	2.77495	0.00907402	0.0359295
seq.10451.11	NUCB1	0.217093	11.3171	2.7732	0.00911349	0.0360643
seq.6399.52	DEFB107A	0.123503	8.46546	2.77285	0.00912128	0.0360737
seq.23687.27	TBC1D20	-0.893559	11.0822	-2.7724	0.00914944	0.0361636
seq.8624.16	UNC5D	-0.188969	8.93054	-2.77123	0.00916241	0.0361934
seq.14037.18	RANBP3	-0.637589	12.2822	-2.77148	0.00917027	0.036203
seq.12895.28	DGKB	0.174836	10.3141	2.76964	0.00919408	0.0362755
seq.21655.18	CEP20	0.174423	11.3203	2.76885	0.00921208	0.0363061
seq.19202.10	BTK	-0.744713	16.7478	-2.76937	0.00921817	0.0363061
seq.11816.84	JAK2	-1.22347	14.3417	-2.76959	0.00921307	0.0363061
seq.21131.109	TYW5	-0.755563	12.1756	-2.76854	0.00923716	0.0363594
seq.25459.3	MACROD2	-0.58585	11.196	-2.76829	0.00924288	0.0363604
seq.6264.9	CCN1	0.233186	8.50181	2.7675	0.00925367	0.0363756
seq.9578.263	MANSC4	-0.240601	8.85721	-2.76763	0.00925765	0.0363756
seq.11278.4	COL11A2	-0.351107	15.9248	-2.76599	0.00927737	0.0364316
seq.17676.13	TRIP10	-1.2229	14.906	-2.76613	0.00929235	0.0364689
seq.15475.4	PLTP	0.307737	13.9102	2.76388	0.00932605	0.0365632
seq.21987.76	LPL	0.20972	11.7914	2.76382	0.00932736	0.0365632
seq.10014.31	SNAI2	0.186915	10.4414	2.76294	0.00934768	0.0365732
seq.12018.84	TPK1	-0.122888	10.4892	-2.76276	0.00935186	0.0365732
seq.12351.25	STAT1	-0.727209	16.2989	-2.7634	0.00935033	0.0365732
seq.9169.14	SUMO3	-0.746355	11.7766	-2.76359	0.00935065	0.0365732
seq.17796.15	IMPA1	0.4515	12.1213	2.75999	0.00942318	0.036809
seq.14019.73	EVPL	0.156924	10.4168	2.75984	0.00941941	0.036809
seq.9369.174	LRRC4C	-0.295616	9.87176	-2.75996	0.00943498	0.0368335
seq.21395.23	PCDH17	-0.35048	12.2986	-2.75864	0.0094474	0.0368569
seq.17686.27	TBCB	-0.762939	15.7178	-2.75899	0.00945757	0.0368569
seq.15570.99	CR2	-0.922346	13.9998	-2.75909	0.00945519	0.0368569
seq.23678.132	SOX10	0.132159	8.37398	2.75703	0.00948502	0.0369207
seq.13678.169	CFD	-0.413334	14.5153	-2.75726	0.00947977	0.0369207
seq.7756.37	KLRF1	-0.171554	9.87539	-2.75631	0.00950203	0.0369653
seq.9074.6	FAXDC2	0.193852	9.44465	2.75373	0.00956459	0.0371735
seq.22150.2	GABPB1	0.10286	9.26321	2.75356	0.00956671	0.0371735
seq.19183.164	RPL12	0.53027	13.7713	2.75262	0.00959075	0.0372452
seq.3630.27	CADM3	-0.23258	10.5104	-2.75221	0.00959852	0.0372537
seq.24707.6	CXorf38	-0.944046	11.9993	-2.75211	0.0096194	0.037313
seq.8956.96	SCARF2	-0.22509	10.4815	-2.74987	0.00965422	0.0374045
seq.10346.5	STAT3	-0.894424	15.6131	-2.75077	0.00965119	0.0374045
seq.21647.9	SRM	-0.295602	8.84941	-2.7501	0.00966714	0.0374071
seq.22568.7	DSG4	-0.607946	9.98401	-2.74991	0.00967172	0.0374071
seq.3363.31	CSK	-0.777291	17.2016	-2.74997	0.00967015	0.0374071
seq.3326.58	CADM1	-0.413616	11.6552	-2.7491	0.00968291	0.0374286
seq.11565.58	ZNF23	-0.249862	8.92329	-2.74889	0.0096931	0.0374463
seq.21991.79	PPP1R9B	-1.39054	15.1142	-2.74629	0.0097583	0.0376763
seq.24252.85	C12orf65	0.199555	9.72183	2.74476	0.00977859	0.0377328
seq.25500.6	RAB11FIP3	-1.22301	11.7025	-2.74508	0.0097875	0.0377453
seq.19215.7	NDRG1	0.140901	10.7824	2.74363	0.00980375	0.0377861
seq.13526.5	SSB	0.12958	9.39182	2.74257	0.00982947	0.0378415
seq.13726.4	CD80	-0.250579	8.80148	-2.7435	0.00982557	0.0378415
seq.24648.8	SLBP	-0.759946	10.8717	-2.74241	0.00985205	0.0378861
seq.3593.72	CASP3	-1.09044	14.9902	-2.74239	0.00985244	0.0378861
seq.2867.52	AKT1	-1.03218	11.7582	-2.74113	0.00988303	0.0379818
seq.3875.62	ARID3A	-0.40851	9.45471	-2.74043	0.00990007	0.0380254
seq.9769.48	DNER	-0.33887	10.6198	-2.73988	0.00990882	0.0380292
seq.15299.102	MESD	-0.987218	13.9841	-2.73992	0.00991246	0.0380292
seq.4355.13	DAPK2	-0.529936	11.7607	-2.73893	0.00993659	0.0380998
seq.5864.10	ALDOA	-0.522836	10.8332	-2.73646	0.00999717	0.03831
seq.24450.96	C19orf54	0.111013	10.2886	2.73504	0.0100133	0.0383331
seq.18280.29	DTD2	-0.855915	11.8128	-2.73575	0.0100147	0.0383331
seq.23666.35	ATIC	-1.01881	11.9988	-2.73492	0.010035	0.038389
seq.21208.163	CEBPE	0.158434	10.2249	2.73347	0.0100521	0.0384323
seq.11350.30	STUB1	-0.568863	11.2071	-2.73356	0.0100689	0.0384681
seq.21189.9	NUBP1	-0.676422	12.2514	-2.73339	0.0100731	0.0384681
seq.20511.3	F11R	-0.599482	9.33346	-2.73304	0.0100816	0.0384787
seq.2890.59	CCL28	-0.544139	13.1584	-2.72993	0.0101455	0.0387002
seq.13439.6	IQCF3	-0.302217	11.4084	-2.72919	0.0101585	0.0387277
seq.11536.9	MYSM1	-0.109865	10.4432	-2.72815	0.0101844	0.0388043
seq.21889.2	GGCT	-0.265987	10.3548	-2.72828	0.0101917	0.0388101
seq.13450.49	USP8	-1.11037	13.8553	-2.72568	0.0102656	0.0390689
seq.5669.26	SIRPB2	-0.261371	10.953	-2.72457	0.0102746	0.0390809
seq.17435.43	ETFA	-0.172111	11.6864	-2.7223	0.0103319	0.0392765
seq.17411.55	UFD1	-1.1935	13.387	-2.7225	0.0103459	0.0393072
seq.3381.24	LYN	-1.04612	16.6023	-2.72147	0.010372	0.0393842
seq.16932.5	SULT1E1	0.19434	10.2759	2.719	0.0104159	0.0395281
seq.13510.7	ATP2A3	-0.110982	10.9294	-2.71796	0.0104426	0.0395717
seq.22858.3	MAPK6	-0.312133	16.2042	-2.71786	0.0104452	0.0395717
seq.11333.82	ARHGAP25	-0.660112	15.5859	-2.71875	0.0104338	0.0395717
seq.16875.13	MAGOHB	-0.266292	10.4696	-2.71715	0.0104707	0.0396204
seq.8854.59	RRM2B	-0.514038	12.0592	-2.71768	0.0104655	0.0396204
seq.14291.53	AGAP2	-1.2889	11.1248	-2.71741	0.0104759	0.0396204
seq.3059.50	TNFSF13B	0.217153	10.4844	2.71579	0.0104983	0.0396829
seq.6378.2	C5orf38	0.435855	12.1577	2.71536	0.0105148	0.0397226
seq.21191.24	DUSP21	-0.328374	9.19905	-2.71468	0.0105462	0.0397824
seq.12621.55	PPP2R1A	-0.726092	12.4537	-2.71459	0.0105486	0.0397824
seq.15314.49	CLIC4	-1.03346	14.9802	-2.71502	0.0105374	0.0397824
seq.2634.2	IL2RG	-0.848194	12.3999	-2.7139	0.0105662	0.0398266
seq.17509.6	HPD	0.181216	9.79666	2.7128	0.0105754	0.0398386
seq.25118.45	BICD1	-0.325787	12.603	-2.71107	0.0106204	0.0399856
seq.22015.2	TRIM21	-0.259879	10.9141	-2.71058	0.0106332	0.0400109
seq.11626.7	UBE2V1	-0.879218	12.3506	-2.7092	0.0106886	0.0401968
seq.21438.45	TRIM5	-0.555726	12.198	-2.70739	0.0107362	0.040353
seq.10895.28	TMPRSS11B	0.124	9.96134	2.70449	0.010793	0.0404752
seq.8748.45	CD74	-0.133906	9.73698	-2.70491	0.0107819	0.0404752
seq.17852.5	PPME1	-0.744875	14.8113	-2.70538	0.010789	0.0404752
seq.10363.13	SMAD3	-0.781062	13.9768	-2.70549	0.010786	0.0404752
seq.13062.4	GMFG	-0.501104	12.1515	-2.70417	0.0108131	0.040528
seq.7145.1	ITIH3	0.378759	11.4471	2.70183	0.010875	0.0407139
seq.7262.191	CHST14	0.135316	9.2434	2.70158	0.0108701	0.0407139
seq.9795.9	CLN5	0.11352	9.85796	2.70115	0.0108815	0.0407155
seq.13733.5	IL12B	0.455976	8.51835	2.70164	0.010888	0.0407168
seq.25906.5	EEF1A1	0.135308	10.6185	2.69961	0.0109226	0.0407975
seq.22082.25	BEX2	-0.130545	9.96797	-2.69964	0.0109217	0.0407975
seq.23541.61	CLYBL	-0.794977	11.3472	-2.69992	0.010934	0.0407975
seq.19379.154	RAB3D	-1.14404	11.7425	-2.70014	0.0109281	0.0407975
seq.20183.48	MEOX1	0.116838	9.27231	2.69844	0.0109537	0.0408024
seq.16606.85	AKR1B1	-0.585968	13.7744	-2.69896	0.0109508	0.0408024
seq.25232.4	EHD3	-0.957401	15.4635	-2.6995	0.0109451	0.0408024
seq.9994.217	ATP4B	0.705811	12.1497	2.69889	0.0109616	0.0408089
seq.13594.158	GGA1	-0.876055	15.0813	-2.69805	0.010984	0.0408696
seq.14034.22	TACSTD2	0.132949	9.41542	2.69626	0.0110125	0.0409374
seq.16307.22	UNC5D	-0.480924	11.6824	-2.69691	0.0110145	0.0409374
seq.3175.51	ADAMTS13	-0.447663	14.3263	-2.69536	0.0110366	0.0409967
seq.13595.20	THTPA	0.113	9.91034	2.69444	0.0110615	0.0410664
seq.11126.102	TRIO	-0.221684	9.39951	-2.69453	0.0110708	0.0410777
seq.15553.22	ACHE	0.113028	9.53206	2.69353	0.0110861	0.0410887
seq.8601.167	LRP1	-0.218368	9.5968	-2.69394	0.0110826	0.0410887
seq.5687.5	PRKCSH	-0.42553	11.9064	-2.69322	0.0111037	0.0411313
seq.22492.108	LMO3	0.198521	10.567	2.69185	0.0111316	0.0411438
seq.21149.27	CUEDC1	-0.197421	10.3773	-2.69242	0.0111162	0.0411438
seq.8005.1	MXRA7	-0.246133	10.2475	-2.69225	0.0111286	0.0411438
seq.5480.49	CCL5	-0.417712	15.1736	-2.69184	0.0111318	0.0411438
seq.7249.307	BCL2L10	0.230112	10.5236	2.69128	0.0111472	0.0411781
seq.19213.1	SPINK4	0.260916	11.5318	2.68997	0.0111829	0.0412642
seq.3222.11	SEMA3A	-0.172782	10.1046	-2.69019	0.0111768	0.0412642
seq.7084.1	DRAXIN	0.141782	8.77994	2.68846	0.0112241	0.0413932
seq.21681.10	ADAM28	0.163524	9.82268	2.68706	0.0112627	0.0414895
seq.20433.19	MRPL1	-1.28354	12.3368	-2.68778	0.0112627	0.0414895
seq.23352.9	DTNBP1	0.150879	8.12843	2.68581	0.0112969	0.0415696
seq.2889.37	CTF1	0.112084	9.47494	2.68596	0.011293	0.0415696
seq.19275.68	IDH3G	-0.93606	12.6317	-2.68455	0.0113519	0.0417491
seq.22587.37	EPHA6	-0.33987	12.4569	-2.68348	0.0113614	0.0417608
seq.23266.62	MITD1	-1.37553	11.8116	-2.68332	0.011386	0.041828
seq.22483.109	KRT71	0.331285	10.4351	2.68284	0.0113994	0.0418312
seq.11480.1	ALDH3A1	0.115076	8.35986	2.68223	0.0113961	0.0418312
seq.19370.30	HS3ST4	0.177126	11.2491	2.68145	0.0114177	0.0418522
seq.4230.1	EIF4G2	-1.24909	13.9076	-2.68223	0.0114162	0.0418522
seq.17380.2	UBE2K	-0.500792	15.2192	-2.67955	0.0114708	0.042024
seq.3152.57	TNFRSF1B	0.288695	11.3158	2.67773	0.0115218	0.042141
seq.20586.18	CNTN3	-0.324084	10.1593	-2.67871	0.0115144	0.042141
seq.17332.3	ADPRS	-0.616245	13.9135	-2.67824	0.0115194	0.042141
seq.9296.15	PTPRD	-0.46386	13.4609	-2.6769	0.0115451	0.0422033
seq.25493.11	FAM221B	-0.276192	9.46853	-2.67721	0.0115566	0.0422221
seq.11211.7	TBCE	-1.01223	14.1618	-2.67678	0.0115688	0.0422436
seq.25115.21	FHOD1	-1.24069	15.9069	-2.67641	0.0115793	0.0422586
seq.11109.56	SVEP1	0.309488	11.491	2.67398	0.0116274	0.0424112
seq.21765.10	CYLD	-1.12189	12.2812	-2.67365	0.011657	0.0424958
seq.8397.147	QSOX2	-0.39872	10.9942	-2.67234	0.0116945	0.042609
seq.3216.2	PIGR	0.544609	11.1348	2.67159	0.0117157	0.0426631
seq.6622.90	APLN	-0.209209	10.1085	-2.67028	0.0117326	0.0426781
seq.12746.4	CYTH4	-0.390504	10.4503	-2.67102	0.0117318	0.0426781
seq.9275.2	SIGLEC5	0.694439	14.2795	2.66987	0.0117566	0.0427188
seq.20167.6	RAB8B	-1.36031	12.7164	-2.67022	0.0117549	0.0427188
seq.9490.3	FAM241A	0.178074	11.0149	2.66808	0.0117955	0.0428367
seq.24947.40	NUMBL	0.184415	8.77523	2.668	0.0118027	0.0428396
seq.5629.58	KLRC1	-0.138035	9.95419	-2.66708	0.0118244	0.0428947
seq.16300.4	TREM2	0.630558	12.4897	2.66738	0.0118362	0.0429142
seq.7146.16	PDIA4	0.176752	10.1452	2.66545	0.0118711	0.0430174
seq.4212.5	EPS15L1	-0.902176	11.0454	-2.66493	0.0119068	0.0430998
seq.17794.6	PMM2	-0.983387	14.5108	-2.66509	0.0119022	0.0430998
seq.18914.188	PAFAH2	-0.275073	9.97576	-2.66442	0.0119217	0.0431304
seq.4961.17	ANXA2	-0.285566	10.1471	-2.66402	0.0119295	0.0431352
seq.22065.32	IRF8	0.197502	11.3036	2.66285	0.0119465	0.04315
seq.11448.34	GALK1	-0.717378	13.9505	-2.66377	0.0119405	0.04315
seq.21231.3	CHRNA5	0.089239	9.25386	2.66203	0.0119704	0.0432129
seq.9065.28	TXLNA	-0.251795	10.916	-2.66118	0.0119951	0.0432786
seq.12812.25	ACYP2	-0.690942	13.7726	-2.66135	0.0120108	0.0433118
seq.5980.55	BOLA3	-0.800647	11.4522	-2.66082	0.0120263	0.043344
seq.20111.5	BASP1	0.29203	10.8309	2.65974	0.0120421	0.0433774
seq.11198.37	CREB3L1	0.155099	10.3207	2.65709	0.0121147	0.0436154
seq.3825.18	MAPK8	-0.502693	10.4725	-2.65696	0.0121393	0.0436807
seq.7895.108	MRAP	0.172715	10.5103	2.65602	0.0121461	0.0436815
seq.23037.37	UBE2D3	0.259454	9.72291	2.65571	0.0121708	0.0437467
seq.8364.74	UST	-0.449269	10.7087	-2.65525	0.0121898	0.0437914
seq.19360.22	LRRTM1	0.146078	9.18822	2.65429	0.0121975	0.0437954
seq.3469.74	RPS6KA3	-0.95205	12.7683	-2.65425	0.0122193	0.0438501
seq.3486.58	FGF1	0.127539	7.61294	2.65328	0.0122274	0.0438554
seq.25227.20	TCEAL2	0.225411	9.29738	2.65133	0.0122979	0.0440609
seq.14249.68	MID2	0.0997544	9.21581	2.65103	0.0122941	0.0440609
seq.20448.7	POLR2F	0.110812	9.24761	2.64817	0.0123798	0.044279
seq.11217.16	CTBP1	-0.770542	11.1273	-2.64907	0.0123737	0.044279
seq.15608.5	RPS6KB1	-0.858687	11.2516	-2.64929	0.0123672	0.044279
seq.3817.18	PRKCQ	-1.16308	12.4114	-2.64868	0.0123854	0.044279
seq.9595.11	B4GALT2	-0.297751	10.3511	-2.64726	0.0124228	0.0443889
seq.11438.6	DNAJB2	-0.356247	13.1321	-2.64564	0.0124559	0.0444596
seq.25248.28	NUMB	-0.757572	14.0438	-2.64652	0.0124505	0.0444596
seq.8974.172	COL15A1	-0.370395	12.8078	-2.64536	0.0124642	0.0444654
seq.10082.251	NEFL	0.345949	9.56335	2.64524	0.0124891	0.044483
seq.6932.42	ITGA5	0.241264	11.1543	2.64459	0.0124877	0.044483
seq.8635.283	ZPBP	0.17162	12.1835	2.64484	0.01248	0.044483
seq.5756.66	PAPPA2	-0.20719	11.1853	-2.64384	0.0125102	0.044534
seq.6069.71	SUMF2	-0.331463	13.4631	-2.64357	0.0125186	0.0445401
seq.19118.47	OSTF1	-0.226439	11.556	-2.64271	0.0125444	0.0446083
seq.13453.2	MRPL33	0.164497	10.1095	2.64245	0.0125526	0.0446136
seq.2747.3	ULBP3	-0.32252	10.1483	-2.64268	0.0125667	0.0446258
seq.6609.22	CNP	-1.11054	13.398	-2.64259	0.0125694	0.0446258
seq.10731.10	HS3ST5	-0.217787	11.5554	-2.64095	0.0125981	0.0447038
seq.2900.53	CCL14	0.489947	12.7386	2.63997	0.0126341	0.0448077
seq.13969.24	KPNA6	-1.05958	12.8388	-2.63977	0.0126553	0.044859
seq.17335.18	VAMP2	-0.903299	11.8976	-2.63936	0.012668	0.0448801
seq.10558.26	PCDH9	-0.630639	13.6257	-2.63867	0.0126807	0.0449013
seq.25215.1	TIMM10	-0.614578	11.4606	-2.63852	0.0126936	0.0449232
seq.11547.84	MUSK	0.553266	11.9578	2.63802	0.012709	0.0449323
seq.7083.74	MATN4	-0.607862	10.9024	-2.638	0.0127097	0.0449323
seq.4330.4	KLK3	0.150492	7.83775	2.63593	0.012752	0.0450581
seq.17854.33	NAA10	-1.016	13.5785	-2.63631	0.0127616	0.045068
seq.19504.22	DTYMK	-0.924576	14.274	-2.63527	0.0127939	0.045158
seq.2523.31	CCL5	-0.366712	15.2821	-2.63374	0.0128198	0.0452256
seq.21122.3	DBNDD2	0.228434	10.7947	2.6313	0.0128954	0.0454203
seq.4149.8	PDGFB	-0.492245	15.8398	-2.63149	0.0128897	0.0454203
seq.18308.30	STXBP6	-0.501338	12.6589	-2.63194	0.0128875	0.0454203
seq.12396.19	HIBCH	-1.24091	13.1059	-2.63113	0.0129223	0.0454909
seq.20215.45	ITGAV	0.195213	8.5474	2.63019	0.0129422	0.0454981
seq.11669.39	SLCO5A1	0.164146	8.89181	2.62967	0.0129475	0.0454981
seq.15634.139	SLIT1	0.157649	8.99399	2.6295	0.0129517	0.0454981
seq.15567.2	CD247	0.136525	9.27013	2.62952	0.0129511	0.0454981
seq.13524.25	HS6ST2	0.223136	9.03367	2.62919	0.012975	0.045556
seq.9030.56	NDUFAF8	-0.0942324	9.66134	-2.62836	0.0129873	0.0455699
seq.12022.12	SMAD4	-0.456313	9.62151	-2.62888	0.0129926	0.0455699
seq.6359.50	POMGNT2	-0.40224	10.1416	-2.62801	0.0130201	0.0456422
seq.5885.55	EIF4H	-0.981353	14.6792	-2.62649	0.0130679	0.0457858
seq.16867.76	CDK16	-0.496721	11.2982	-2.62605	0.0130817	0.0458099
seq.20946.41	GTSF1	0.0906762	9.27573	2.6234	0.0131439	0.0459887
seq.5727.35	B3GLCT	-0.44849	9.95523	-2.624	0.0131465	0.0459887
seq.14226.120	BHMT2	0.279207	10.9678	2.62283	0.0131665	0.0460343
seq.11287.14	CYB5A	0.31966	10.5399	2.62141	0.0132202	0.0460669
seq.7242.14	VSTM4	0.306927	10.8718	2.62172	0.01321	0.0460669
seq.19623.26	RPSA	0.219762	10.2394	2.62095	0.0132239	0.0460669
seq.22967.15	GDF7	0.0989367	9.26783	2.62151	0.0132041	0.0460669
seq.6612.90	BRICD5	-0.360892	11.2669	-2.6219	0.0132045	0.0460669
seq.12855.16	CASS4	-0.502411	11.0945	-2.62188	0.0132139	0.0460669
seq.24425.8	MARS1	-0.962999	14.2638	-2.62156	0.0132242	0.0460669
seq.5693.6	REG1B	0.151421	9.56563	2.61933	0.0132737	0.0462153
seq.5121.3	SEMA6B	0.213659	10.9501	2.61907	0.0132821	0.0462202
seq.10949.59	RPLP2	0.150338	9.47466	2.61875	0.0132922	0.0462268
seq.12689.56	ARPC1B	-0.757829	15.3094	-2.61925	0.0132978	0.0462268
seq.5489.18	STIP1	-0.626619	12.5756	-2.61888	0.0133098	0.0462443
seq.5747.67	BGLAP	0.140842	9.07558	2.61798	0.0133169	0.0462449
seq.13554.78	REPIN1	0.147457	10.1257	2.61603	0.0133797	0.0464385
seq.9854.36	AKR1B1	-0.811606	12.6717	-2.61627	0.0133939	0.0464637
seq.13544.9	ARHGAP45	-0.945353	15.3739	-2.61503	0.0134336	0.0465774
seq.2211.9	TIMP1	0.523604	12.345	2.61343	0.0134767	0.0467025
seq.7257.18	PTH2	0.115318	8.99894	2.61172	0.0135193	0.0467146
seq.9577.26	SYT2	-0.248531	10.0963	-2.61212	0.0135191	0.0467146
seq.19333.4	HNRNPK	-0.467386	14.022	-2.61181	0.0135164	0.0467146
seq.2970.60	AREG	-0.6684	11.5226	-2.6123	0.0135223	0.0467146
seq.10001.7	RAF1	-0.737388	10.0321	-2.61282	0.0135055	0.0467146
seq.13657.2	PNKP	-0.835918	11.3797	-2.61303	0.0134986	0.0467146
seq.8470.213	RNASEH1	-0.326782	7.80184	-2.61176	0.0135399	0.0467512
seq.2998.53	JAM3	-0.60575	11.9353	-2.61105	0.013563	0.0468067
seq.5140.56	UNC5D	-0.448566	11.6944	-2.61051	0.0135748	0.0468233
seq.12738.43	NISCH	-0.205547	12.2139	-2.60778	0.0136481	0.047027
seq.5109.24	NRCAM	-0.408649	9.68016	-2.60824	0.0136551	0.047027
seq.3814.63	IL11RA	-0.558691	11.4529	-2.60864	0.013642	0.047027
seq.7655.11	NPPB	1.13287	11.5865	2.60679	0.0137026	0.0471665
seq.12515.45	UCK2	-0.280547	10.6787	-2.60572	0.0137269	0.047194
seq.14066.49	MAGI2	-0.499464	9.60055	-2.60591	0.0137319	0.047194
seq.23363.41	PCBP2	-1.1709	14.9675	-2.60616	0.0137233	0.047194
seq.2516.57	CCL21	0.317837	12.5449	2.60455	0.0137543	0.0472424
seq.25105.87	EIF2A	-0.778756	13.4475	-2.60505	0.0137601	0.0472424
seq.20948.16	NUDT16	-0.519632	14.2096	-2.6036	0.0137881	0.0473141
seq.8994.65	SLAMF8	0.251203	9.72716	2.6031	0.0138157	0.0473844
seq.12077.32	MSTN	-0.273767	12.2106	-2.60198	0.0138398	0.0474427
seq.4136.40	IL17D	0.194219	8.76996	2.60167	0.0138631	0.0474979
seq.21563.3	PLA2G12A	-0.75812	14.829	-2.60023	0.0139203	0.0476694
seq.12869.68	DDX6	-0.916964	16.0667	-2.59804	0.0139936	0.0478712
seq.9864.38	TTC1	-1.09603	15.4325	-2.59806	0.013993	0.0478712
seq.6210.100	IFNA5	0.160376	9.69616	2.59694	0.0140083	0.0478969
seq.11275.94	LRP1B	0.236195	10.4964	2.59651	0.0140247	0.0479285
seq.18829.4	EIF4A1	-0.753705	14.4154	-2.59569	0.0140729	0.0480687
seq.6912.6	MICU3	0.128142	8.75941	2.59465	0.0140857	0.0480875
seq.11368.32	AK2	-0.950357	15.6601	-2.59379	0.0141372	0.0482386
seq.18823.52	H2BU1	1.14598	11.171	2.59274	0.0141727	0.0482841
seq.19166.15	RPS19	0.344019	13.7042	2.59186	0.0141802	0.0482841
seq.5001.6	SCGB2A1	0.221923	12.5382	2.59171	0.0141851	0.0482841
seq.11911.13	LRRC4B	0.169545	7.93699	2.59223	0.0141726	0.0482841
seq.6556.5	ENPP5	-0.322218	10.6827	-2.59173	0.0142012	0.0482841
seq.21129.95	MAD2L1BP	-0.382041	12.1198	-2.59166	0.0141894	0.0482841
seq.25256.23	EEF1A1	-0.875047	15.4087	-2.59205	0.0141961	0.0482841
seq.22527.4	PDLIM3	0.332937	9.34926	2.5913	0.0142219	0.0483296
seq.18225.13	HEBP1	-0.521168	15.1998	-2.59026	0.014237	0.0483563
seq.21491.7	AOC3	-0.358888	15.331	-2.5898	0.0142502	0.0483767
seq.15418.25	MAPK10	-0.818585	11.9362	-2.59022	0.0142585	0.0483802
seq.6653.58	CD47	-0.251566	10.2521	-2.58945	0.0142757	0.048414
seq.7231.37	TMPRSS11A	0.112862	9.49036	2.58776	0.0143204	0.048516
seq.12818.159	SLC14A2	-0.256387	10.5403	-2.58817	0.0143149	0.048516
seq.13580.2	UAP1	0.120411	8.93417	2.58695	0.014348	0.0485494
seq.4396.54	IFNL1	-0.394134	8.22229	-2.58754	0.0143503	0.0485494
seq.16908.5	OMG	-0.543862	11.8574	-2.58749	0.0143521	0.0485494
seq.8334.65	TCP11	0.176782	11.0284	2.58637	0.0143681	0.048579
seq.11229.16	ERN1	-0.457673	11.4527	-2.58638	0.0143902	0.048629
seq.3331.8	RGMB	-0.197952	10.389	-2.58539	0.0144018	0.0486435
seq.20090.63	UBE2E3	-0.499359	10.5627	-2.58525	0.0144292	0.0487113
seq.17447.52	SFRP4	-0.494243	13.0328	-2.58429	0.0144454	0.0487413
seq.8945.7	ABRAXAS2	-0.681185	10.1884	-2.58436	0.0144602	0.0487667
seq.11494.4	ELL2	-0.114622	10.1765	-2.58241	0.0145048	0.0488924
seq.23038.63	UNC5B	-0.375349	13.4033	-2.58126	0.014545	0.0489972
seq.12399.194	CCDC50	-0.536028	11.3163	-2.58154	0.014558	0.0489972
seq.4460.8	PDPK1	-1.28351	11.2781	-2.58164	0.0145544	0.0489972
seq.6551.94	SERPINA12	0.314847	12.1994	2.57947	0.0146075	0.049121
seq.13485.20	TMEM87B	-0.281748	11.7964	-2.57941	0.0146095	0.049121
seq.9923.6	SOS1	0.112079	8.81027	2.57888	0.0146282	0.0491386
seq.23923.26	PPM1F	-0.761328	12.516	-2.57949	0.0146295	0.0491386
seq.7917.17	CPD	0.184577	11.164	2.57782	0.0146651	0.0491411
seq.3860.7	PSMA6	-0.300151	10.595	-2.57841	0.0146609	0.0491411
seq.13967.14	TXNRD1	-0.368623	12.6943	-2.57806	0.0146568	0.0491411
seq.24050.26	GSK3B	-1.30396	13.1873	-2.57842	0.0146671	0.0491411
seq.21478.20	SMAD5	-1.33492	13.3297	-2.57886	0.0146518	0.0491411
seq.25301.48	DYRK1A	0.254439	9.28702	2.57761	0.0146956	0.0492119
seq.2682.68	HSPD1	-1.0949	15.0424	-2.5773	0.0147063	0.0492227
seq.8068.43	MYORG	-0.183836	9.6336	-2.57646	0.0147151	0.0492277
seq.19280.29	UBE2D3	0.35609	11.0876	2.5752	0.0147713	0.0493288
seq.24485.32	BCAP31	0.281729	11.2253	2.5747	0.0147749	0.0493288
seq.20161.41	NCAM1	-0.339643	15.5437	-2.57507	0.0147621	0.0493288
seq.3888.8	ING1	-0.417394	12.4633	-2.57546	0.014753	0.0493288
seq.25211.14	GNG12	0.271666	9.08811	2.57456	0.0148029	0.0493972
seq.21244.57	NPM1	0.335352	12.0664	2.57367	0.0148115	0.0494015
seq.8606.39	GPNMB	-0.23372	9.35285	-2.57375	0.0148227	0.0494139
[truncated: 7 more rows]

## Sheet: Prot 1 wk ARFvHealthy
somaid	symbol	logFC	AveExpr	t	P.Value	adj.P.Val
seq.8989.40	SCUBE1	2.56921	9.07469	25.1066	4.46187e-19	2.97339e-15
seq.14094.29	HBEGF	2.95169	10.2525	16.2353	1.13424e-14	3.77929e-11
seq.8351.17	PRSS57	1.91168	10.08	15.8305	2.0058e-14	4.45555e-11
seq.14146.92	H3C1	-2.77864	12.2351	-12.8226	2.10074e-12	3.49983e-09
seq.3314.74	GFRA1	1.15339	9.48274	10.0183	3.573e-10	4.7621e-07
seq.13738.8	INHBA	1.78837	9.60012	9.71319	6.60308e-10	7.33382e-07
seq.25048.30	PACSIN2	3.25127	14.3017	9.3865	1.29117e-09	1.22919e-06
seq.8942.2	MRPL21	-0.68731	10.9527	-9.26229	1.60675e-09	1.33842e-06
seq.3336.50	TFPI	0.946671	14.4271	9.1933	1.85737e-09	1.37528e-06
seq.25413.80	GAGE2B	-1.26298	12.7078	-9.12013	2.17332e-09	1.4483e-06
seq.4157.2	F2	2.10449	11.3797	8.96561	3.12622e-09	1.73609e-06
seq.5465.32	HS6ST1	0.511652	10.3599	8.95675	3.06763e-09	1.73609e-06
seq.3217.74	SERPINE2	1.17493	12.0467	8.8095	4.25058e-09	2.17891e-06
seq.3070.1	IL2	1.40282	10.8608	8.62776	6.46492e-09	3.0773e-06
seq.20133.1	MAGEA3	-1.46469	12.2528	-8.48758	8.77846e-09	3.89998e-06
seq.5803.24	C3	1.13242	12.7773	8.35966	1.12733e-08	4.69534e-06
seq.5939.42	TNFSF12	0.770904	9.58482	8.31571	1.28188e-08	5.02496e-06
seq.5484.63	RPS3A	0.912117	10.4407	8.24974	1.48396e-08	5.49393e-06
seq.14603.51	KIAA0040	0.932456	10.8395	8.02248	2.46792e-08	8.65592e-06
seq.10464.6	ANTXR1	-0.644888	11.0764	-7.63987	5.7355e-08	1.82006e-05
seq.8660.33	OLFML3	-0.791813	13.3836	-7.65458	5.54398e-08	1.82006e-05
seq.6895.1	TFRC	2.26341	11.9877	7.59904	6.48443e-08	1.8911e-05
seq.13933.276	NAB1	-1.01341	13.3382	-7.58403	6.52689e-08	1.8911e-05
seq.22141.59	PFKFB1	1.36294	11.8668	7.55294	7.21377e-08	2.00302e-05
seq.5598.3	GREM2	0.750162	11.7641	7.36364	1.09136e-07	2.69363e-05
seq.5443.62	NPPA	0.466551	10.7263	7.38482	1.03848e-07	2.69363e-05
seq.2977.7	EDAR	-0.903833	10.5907	-7.3799	1.07897e-07	2.69363e-05
seq.8280.238	VTN	-0.425983	11.2158	-7.30869	1.24184e-07	2.95558e-05
seq.11573.3	SRSF6	0.514358	9.46478	7.27699	1.35091e-07	3.1043e-05
seq.5487.7	SLAMF7	0.683677	11.0716	7.12345	1.92808e-07	4.28291e-05
seq.2505.49	GFRA3	0.623806	10.6998	7.1115	2.00102e-07	4.30154e-05
seq.22783.40	SPI1	2.14459	10.7745	7.09885	2.09206e-07	4.3567e-05
seq.5029.3	FAP	-0.865849	10.6982	-7.08504	2.16178e-07	4.3655e-05
seq.16617.14	CASP14	-0.830967	9.95523	-7.05291	2.33337e-07	4.44274e-05
seq.17345.12	ZADH2	-1.58427	12.9097	-7.05776	2.30665e-07	4.44274e-05
seq.25070.18	MICAL1	-1.14685	12.3844	-7.00912	2.58603e-07	4.78703e-05
seq.3613.62	FCN1	0.862939	12.7414	6.95923	2.84899e-07	4.84445e-05
seq.2946.52	CFD	0.790978	14.632	6.97378	2.75132e-07	4.84445e-05
seq.17820.170	MLF1	-0.640541	12.6444	-6.9541	2.88424e-07	4.84445e-05
seq.5725.1	OMD	-1.11304	12.047	-6.96064	2.90783e-07	4.84445e-05
seq.7202.107	SEMA6C	0.438809	9.01582	6.89301	3.37115e-07	5.47935e-05
seq.3067.67	GDF9	0.421644	9.19652	6.8495	3.71516e-07	5.67221e-05
seq.25209.15	FXYD2	0.357473	11.3289	6.83734	3.81964e-07	5.67221e-05
seq.24647.3	APOBEC2	-0.566349	11.3255	-6.83619	3.83027e-07	5.67221e-05
seq.13117.232	CHKB	-1.49303	13.3994	-6.86194	3.68404e-07	5.67221e-05
seq.25907.47	EML2	0.357614	10.8939	6.77316	4.46052e-07	6.45713e-05
seq.25124.21	ZBTB7A	0.347849	9.91974	6.76459	4.5541e-07	6.45713e-05
seq.12759.47	ILF3	0.800949	10.0114	6.72064	5.17998e-07	7.19154e-05
seq.11116.16	C11orf87	0.370374	11.5463	6.66985	5.73164e-07	7.79503e-05
seq.24721.17	GOLPH3	-1.40774	12.902	-6.66513	5.92582e-07	7.89794e-05
seq.13748.4	CCL8	0.459527	8.41749	6.65109	6.06781e-07	7.92861e-05
seq.4924.32	MMP1	1.23511	14.9194	6.63123	6.43446e-07	8.09043e-05
seq.22005.8	PDP1	-0.431712	10.6767	-6.62587	6.37962e-07	8.09043e-05
seq.11219.95	FGFBP3	1.45374	10.4288	6.59445	7.03674e-07	8.52597e-05
seq.4569.52	SORCS2	-1.29157	10.1494	-6.59938	6.95276e-07	8.52597e-05
seq.25108.6	ATE1	1.19636	11.4231	6.53649	8.10501e-07	9.64496e-05
seq.5813.58	EPO	0.976561	10.0063	6.4985	8.89352e-07	0.000102768
seq.20561.15	CNTN6	-1.02729	11.2781	-6.49617	8.94438e-07	0.000102768
seq.7192.37	IFNLR1	0.512002	9.53723	6.48152	9.27098e-07	0.000104715
seq.8357.43	SULT4A1	0.647678	11.0355	6.44791	9.88494e-07	0.000109789
seq.18397.5	AKR1C4	0.729128	8.77693	6.35863	1.25357e-06	0.000136886
seq.5688.65	CBLN4	-0.667094	11.6381	-6.34421	1.27355e-06	0.000136886
seq.14098.28	CARS1	1.08518	12.0282	6.3304	1.34384e-06	0.000142148
seq.20237.38	OAT	0.488424	9.6766	6.29872	1.43676e-06	0.000149602
seq.4337.49	CRP	2.73711	14.1336	6.29402	1.47002e-06	0.000150711
seq.23622.128	INIP	-1.00075	13.1708	-6.26411	1.5652e-06	0.000158038
seq.8841.65	CILP2	-1.10641	12.1673	-6.25831	1.60562e-06	0.000159699
seq.24643.21	CRYL1	-0.910017	11.7974	-6.23747	1.69057e-06	0.000165676
seq.13473.55	ITPKA	-0.333194	10.5529	-6.22324	1.71838e-06	0.00016596
seq.3065.65	FGF5	0.344415	9.53116	6.21427	1.75708e-06	0.000167274
seq.11387.3	ATF6B	1.30195	10.1794	6.21613	1.78229e-06	0.000167285
seq.2911.27	MDK	0.754198	10.2953	6.20117	1.84962e-06	0.000171193
seq.3322.52	LRIG3	0.642631	12.6335	6.13116	2.16076e-06	0.000197251
seq.24679.35	ETV7	-0.847331	12.0356	-6.1106	2.30812e-06	0.000205084
seq.19365.11	BCAT2	-1.00483	11.8591	-6.11461	2.29316e-06	0.000205084
seq.20173.39	CAPN9	0.295677	11.0062	6.07756	2.46992e-06	0.000215871
seq.22953.85	CEBPB	0.228884	10.0076	6.07363	2.49431e-06	0.000215871
seq.18831.6	LRIG1	0.546485	10.2039	6.07411	2.53031e-06	0.00021618
seq.8009.121	SURF1	0.609644	12.5613	5.95865	3.3265e-06	0.000280605
seq.12686.15	MPST	-0.527419	10.791	-5.93093	3.59072e-06	0.000299107
seq.19335.2	JPT1	-0.891858	13.1492	-5.89628	3.8953e-06	0.000320473
seq.4878.3	F10	0.514684	12.1554	5.88701	3.98259e-06	0.000323658
seq.2683.1	C3	0.810002	13.9931	5.87589	4.09558e-06	0.000328831
seq.6506.54	TMED10	-0.403575	10.6272	-5.8626	4.23491e-06	0.000335969
seq.11833.83	FXN	-0.294869	9.9659	-5.82857	4.61411e-06	0.00035754
seq.19341.36	ACBD6	-0.430133	16.5077	-5.82887	4.61065e-06	0.00035754
seq.8352.26	SIGLEC12	-0.514398	11.4293	-5.81041	4.83034e-06	0.000369993
seq.8817.29	CENPV	-0.352978	9.56017	-5.74921	5.644e-06	0.000427405
seq.6527.1	TRIL	0.416812	11.1803	5.68976	6.55316e-06	0.000490677
seq.19154.41	SERPINE2	1.59778	13.795	5.67023	6.99244e-06	0.000513274
seq.22397.2	XBP1	0.471693	7.7132	5.66498	7.08601e-06	0.000513274
seq.13114.50	LUM	-0.532583	12.8652	-5.65931	7.07889e-06	0.000513274
seq.16773.29	SCUBE3	0.666187	8.17084	5.65999	7.17595e-06	0.000514199
seq.18213.30	UBE2F	-0.45446	9.59336	-5.61243	8.09415e-06	0.000573824
seq.4916.2	IGHD	2.50208	12.8844	5.59969	8.35961e-06	0.000586405
seq.6555.58	STOML2	-0.38493	10.4398	-5.581	8.63606e-06	0.000599486
seq.20947.50	DR1	0.64936	11.3979	5.57261	8.9055e-06	0.000611817
seq.3520.58	TGFB3	0.288112	8.39423	5.54992	9.34617e-06	0.000635539
seq.18832.65	SAA2	0.903187	11.3722	5.545	9.6034e-06	0.000646435
seq.15667.39	BMP4	0.42091	10.0438	5.50984	1.04129e-05	0.000693913
seq.9723.105	MMRN2	0.43256	9.64346	5.50368	1.06663e-05	0.000703761
seq.2851.63	C5	0.73315	13.2274	5.4606	1.17341e-05	0.000753817
seq.22055.31	FOXO1	0.569657	12.3182	5.4596	1.17643e-05	0.000753817
seq.17739.1	HADH	-1.21457	14.7957	-5.46737	1.16977e-05	0.000753817
seq.8243.55	SPINK1	0.268371	9.61864	5.45027	1.20474e-05	0.000764608
seq.5691.2	CRISPLD2	2.00944	9.70986	5.43479	1.27093e-05	0.000785269
seq.11556.19	ARFGAP1	0.329166	10.3607	5.42879	1.27264e-05	0.000785269
seq.6491.59	KLK15	-0.36836	10.8073	-5.43147	1.26397e-05	0.000785269
seq.10054.3	GAN	-0.255257	8.90483	-5.41831	1.30714e-05	0.000799152
seq.22985.160	IGFBP2	0.938457	14.9419	5.40396	1.36719e-05	0.000827197
seq.3587.53	BMP10	0.434417	11.049	5.39769	1.37783e-05	0.000827197
seq.9259.35	TNFRSF21	0.520053	12.0219	5.38064	1.4392e-05	0.000850326
seq.4547.59	FLRT1	-0.323926	11.0115	-5.37991	1.44188e-05	0.000850326
seq.3401.8	PTPN2	0.243375	9.16077	5.37132	1.4739e-05	0.000861583
seq.3178.5	CTSC	0.272186	9.54921	5.36252	1.50741e-05	0.000873511
seq.14032.2	VEGFA	0.783879	10.4801	5.35453	1.55943e-05	0.000895865
seq.24712.6	GTPBP10	-0.303799	9.30474	-5.33818	1.60425e-05	0.000913736
seq.19767.20	CCNE1	0.471703	11.9334	5.32385	1.66416e-05	0.000939828
seq.12707.26	DPYSL3	-0.511823	11.1221	-5.29349	1.80256e-05	0.00100944
seq.9233.71	TFPI2	0.419045	9.41671	5.2848	1.86339e-05	0.0010267
seq.4785.30	SERPINA6	-0.163554	8.91091	-5.27345	1.89344e-05	0.0010267
seq.23370.39	KCNAB3	-0.50719	10.2491	-5.27821	1.89502e-05	0.0010267
seq.12954.71	PPARA	-0.760756	11.5296	-5.28082	1.88244e-05	0.0010267
seq.23006.19	PIP4K2B	0.883796	10.3361	5.26969	1.93675e-05	0.00104085
seq.14337.1	TRAPPC3	0.424129	10.4254	5.26202	1.95242e-05	0.00104087
seq.3831.21	PTEN	1.1253	9.68969	5.26074	1.98159e-05	0.00104804
seq.10606.34	TOR1AIP1	-0.723388	12.8461	-5.24202	2.05229e-05	0.00107688
seq.8890.9	TMEM132B	0.495154	12.4487	5.23497	2.08969e-05	0.00108795
seq.18301.10	NAIF1	-0.535365	12.4946	-5.2315	2.10837e-05	0.00108916
seq.21660.4	SAR1B	-1.32707	13.3716	-5.22566	2.16763e-05	0.00111116
seq.17450.51	HARS1	1.79832	14.7123	5.2082	2.26669e-05	0.00112726
seq.21290.66	HUS1	0.745334	11.0372	5.21609	2.22137e-05	0.00112726
seq.4566.24	RSPO2	0.234906	8.52172	5.20572	2.25254e-05	0.00112726
seq.12457.10	ADI1	-0.30297	10.1744	-5.20645	2.24835e-05	0.00112726
seq.6998.106	ASPH	0.799807	11.1618	5.19268	2.35863e-05	0.00115867
seq.4122.12	DDR1	0.364042	8.72898	5.19137	2.36463e-05	0.00115867
seq.22844.4	ZSWIM7	-0.646074	9.92844	-5.18351	2.41465e-05	0.00116603
seq.6406.3	NMES1	-1.16863	12.622	-5.18511	2.40479e-05	0.00116603
seq.3077.66	F10	0.606413	11.974	5.15948	2.53976e-05	0.00121762
seq.13501.10	SLC35G2	-1.02384	12.0936	-5.15544	2.59473e-05	0.00123509
seq.22383.21	MITF	1.06307	9.04889	5.15261	2.61361e-05	0.00123525
seq.10558.26	PCDH9	-0.902169	13.694	-5.1342	2.7227e-05	0.00127775
seq.22091.14	UPB1	0.37141	10.1973	5.12711	2.75641e-05	0.00127808
seq.7747.47	NDUFB11	-0.750539	12.1665	-5.1308	2.76177e-05	0.00127808
seq.16818.200	CDCP1	0.753685	10.9611	5.12736	2.78833e-05	0.00128148
seq.3497.13	IFNA2	0.183997	7.02522	5.11219	2.86416e-05	0.00130731
seq.23342.4	ARRDC5	1.37443	10.9475	5.06174	3.29957e-05	0.0014857
seq.7991.54	IQCF1	-0.534093	10.9169	-5.06343	3.28526e-05	0.0014857
seq.8469.41	IGFBP2	1.27968	13.9438	5.03113	3.56939e-05	0.00150496
seq.13022.20	TP53I11	1.08413	11.2177	5.04237	3.46785e-05	0.00150496
seq.9835.16	ALDH1A3	1.03174	12.2619	5.04461	3.44789e-05	0.00150496
seq.6425.87	MMP19	0.769394	13.1063	5.02134	3.62504e-05	0.00150496
seq.3221.54	SFRP1	0.433924	9.13314	5.02393	3.63594e-05	0.00150496
seq.6213.10	CGB2	0.316536	10.1128	5.04545	3.40044e-05	0.00150496
seq.20396.70	COMMD6	0.311615	9.96927	5.02802	3.55649e-05	0.00150496
seq.11263.57	CASQ1	-0.364801	12.9176	-5.03985	3.44986e-05	0.00150496
seq.22496.21	LYRM1	-0.466451	12.1418	-5.02378	3.59546e-05	0.00150496
seq.25414.11	LCE3B	-0.503712	9.83219	-5.04506	3.44397e-05	0.00150496
seq.15641.20	TMEFF1	-0.508107	10.9613	-5.03714	3.50682e-05	0.00150496
seq.7638.30	LMAN2	-0.772733	13.8972	-5.02234	3.61171e-05	0.00150496
seq.24435.1	DNM1	-1.34543	15.0511	-5.03441	3.53941e-05	0.00150496
seq.22128.8	ELK4	0.212784	9.59305	5.01227	3.70365e-05	0.00152353
seq.5701.81	CLEC3B	-0.477408	12.7047	-5.0094	3.73113e-05	0.00152542
seq.3471.49	STK16	0.552931	11.5079	5.00075	3.82524e-05	0.00153563
seq.2953.31	CGA|LHB	-0.311311	9.25792	-5.00506	3.78014e-05	0.00153563
seq.6543.182	PRLH	-0.430868	11.1488	-5.00003	3.82217e-05	0.00153563
seq.21350.29	LIN28B	0.227866	8.91047	4.99304	3.8916e-05	0.00155291
seq.3204.2	LTA4H	0.628504	11.5421	4.98893	3.97023e-05	0.00157094
seq.8002.27	TMPRSS5	-0.310361	9.9113	-4.98394	3.98393e-05	0.00157094
seq.23638.3	CARNMT1	0.293875	9.38964	4.97723	4.05337e-05	0.00158193
seq.19372.7	MDGA2	-0.639794	11.9501	-4.97828	4.05929e-05	0.00158193
seq.5618.50	FAM3B	-0.601271	11.7012	-4.97628	4.08341e-05	0.00158209
seq.7197.2	DNAJC15	0.224937	8.62052	4.96908	4.13936e-05	0.00158553
seq.23654.6	ALG2	-0.815483	10.3098	-4.97342	4.13989e-05	0.00158553
seq.9377.25	KITLG	-0.408465	10.8669	-4.95993	4.2381e-05	0.00161387
seq.9762.14	VASP	-0.504331	16.2218	-4.95009	4.34687e-05	0.00164588
seq.21569.49	STK10	0.632369	11.9196	4.94179	4.46159e-05	0.00167978
seq.9187.2	HMGN1	1.05021	10.8244	4.94167	4.49188e-05	0.00168168
seq.20918.28	SNRPC	-0.526906	11.0305	-4.93231	4.59298e-05	0.00170992
seq.8459.10	BMP6	-0.743121	9.41617	-4.92735	4.66042e-05	0.00172539
seq.7857.22	NTS	0.878244	11.0503	4.92309	4.71175e-05	0.00173476
seq.3168.8	ADAMTS5	0.220208	8.97237	4.91187	4.79678e-05	0.00175636
seq.4925.54	MMP13	1.26567	9.79706	4.90221	4.97167e-05	0.00180061
seq.5358.3	OMD	-0.895491	15.5993	-4.90199	4.96752e-05	0.00180061
seq.20076.7	MNDA	1.62801	16.0249	4.8982	5.02333e-05	0.00180948
seq.19158.1	PCLAF	0.675221	11.7641	4.89433	5.06447e-05	0.00181174
seq.11568.2	FKBP1B	-1.12192	10.9835	-4.89353	5.08397e-05	0.00181174
seq.2681.23	HGF	0.901368	10.5886	4.88293	5.22457e-05	0.00185194
seq.8013.9	LMAN2L	-1.03381	11.7231	-4.87686	5.30684e-05	0.00187115
seq.2514.65	EFNB3	0.396556	10.3491	4.8691	5.3841e-05	0.0018884
seq.6913.189	HMGB2	0.425486	9.22881	4.86628	5.4533e-05	0.00190266
seq.7989.5	C1orf226	0.98938	12.6271	4.86013	5.5402e-05	0.00192291
seq.25121.7	NOMO2	0.352406	10.2667	4.84164	5.75537e-05	0.00198724
seq.3628.3	MAP2K2	0.481575	11.6284	4.8372	5.81539e-05	0.00199762
seq.6379.62	ADAMTSL2	0.375569	10.1907	4.81845	6.10359e-05	0.00208586
seq.7915.31	APLP2	0.396913	11.3414	4.80318	6.34877e-05	0.00215858
seq.23359.25	WTAP	0.38371	12.0197	4.79326	6.51339e-05	0.00219038
seq.4769.10	OLFM4	0.259525	8.21808	4.79516	6.48155e-05	0.00219038
seq.13681.173	CSNK2A2	0.219175	9.89526	4.79163	6.54091e-05	0.00219038
seq.3580.25	SERPINA1	0.559663	15.354	4.78315	6.68556e-05	0.00222763
seq.7210.25	APLP1	-1.15209	11.9625	-4.77571	6.88522e-05	0.00228274
seq.16317.20	DSG3	1.1739	11.2653	4.77034	6.98117e-05	0.00230309
seq.3311.27	FCGR3B	0.698323	11.9247	4.76708	7.03993e-05	0.00231104
seq.2783.18	CCL3L1	0.477864	11.0235	4.76012	7.1464e-05	0.0023231
seq.4553.65	HDGFL2	0.367724	9.51258	4.76132	7.14523e-05	0.0023231
seq.17512.2	NMI	-0.637345	15.4627	-4.75157	7.2532e-05	0.00234638
seq.6255.74	CPXM1	1.54171	12.4858	4.72932	7.75898e-05	0.00248666
seq.6064.4	ERP44	-0.615869	14.5447	-4.72481	7.77199e-05	0.00248666
seq.23541.61	CLYBL	-1.12702	11.4914	-4.72734	7.79881e-05	0.00248666
seq.18821.9	C4A|C4B	1.31808	12.7524	4.70158	8.33376e-05	0.00263283
seq.2715.25	EPOR	-0.340947	9.28387	-4.70147	8.33626e-05	0.00263283
seq.6433.57	FAM20A	0.431831	10.7962	4.69498	8.42723e-05	0.00264901
seq.22369.12	DMRTC2	-0.627219	10.5027	-4.69098	8.56449e-05	0.00267952
seq.21286.29	RPL11	0.301531	10.0745	4.68087	8.70547e-05	0.00269829
seq.20187.10	ITGAV|ITGB3	-0.730808	12.1187	-4.68481	8.70163e-05	0.00269829
seq.9851.9	FABP4	-0.516447	13.308	-4.67682	8.79699e-05	0.00271404
seq.17161.1	DDOST	-0.699937	11.233	-4.67452	8.93545e-05	0.00274405
seq.24244.81	RILP	1.76874	10.1077	4.67049	9.02871e-05	0.00275997
seq.21154.8	CAB39L	-0.805551	12.3318	-4.66129	9.24524e-05	0.00281326
seq.24490.16	THAP4	-0.474304	11.0755	-4.64572	9.57059e-05	0.00289902
seq.15559.5	ANTXR2	-0.876364	12.8451	-4.64499	9.64186e-05	0.00290739
seq.24911.57	MVP	-1.49596	11.3873	-4.63554	9.87941e-05	0.0029656
seq.23408.1	SNX16	-0.535004	10.0201	-4.63369	9.92663e-05	0.00296641
seq.7853.19	SCO1	-0.373821	11.1234	-4.60394	0.000106182	0.00315892
seq.13740.51	FRZB	0.654909	10.7433	4.59002	0.00011109	0.00321872
seq.22527.4	PDLIM3	0.498036	9.39373	4.59763	0.000108933	0.00321872
seq.13517.3	PTCHD3	0.385306	9.0319	4.59118	0.000110758	0.00321872
seq.22103.25	CDK20	-0.237457	10.2278	-4.5875	0.000110786	0.00321872
seq.23394.125	GAS2	-0.337794	8.86758	-4.5915	0.000110648	0.00321872
seq.5744.12	MENT	-0.635554	11.0962	-4.59205	0.000110511	0.00321872
seq.15515.2	SAA1	2.79571	12.7753	4.5882	0.000111613	0.00321986
seq.12627.97	ATG7	1.43322	10.7635	4.58228	0.000113328	0.00324161
seq.22968.9	GAGE2D	-1.10273	12.2062	-4.58224	0.00011334	0.00324161
seq.21863.11	NUBP2	-0.490929	12.0105	-4.57319	0.000114952	0.00327369
seq.16885.49	MAPRE3	-0.467522	16.3495	-4.56679	0.000116868	0.0033072
seq.19553.14	STX1A	-0.561283	11.5723	-4.56902	0.000117122	0.0033072
seq.9952.57	TFAM	-1.10991	14.3542	-4.56694	0.000117896	0.00331501
seq.4867.15	VEGFA	0.733669	9.63587	4.54737	0.000123993	0.00347179
seq.11615.16	DAPP1	-0.918562	16.1811	-4.53855	0.000126841	0.00353668
seq.3387.1	PAK3	0.567713	10.2676	4.53606	0.000127657	0.00354461
seq.14226.120	BHMT2	0.30871	10.9063	4.53078	0.000128252	0.0035454
seq.24496.26	RILPL1	-0.87096	10.4894	-4.53116	0.000129281	0.0035454
seq.12699.28	CCT8	-1.20928	15.4539	-4.53243	0.000128859	0.0035454
seq.3404.51	TPSG1	0.35376	8.91775	4.52655	0.000130824	0.00357299
seq.5033.27	TPM1	-0.330181	11.0706	-4.52141	0.000131392	0.00357386
seq.10627.87	APLP2	0.614309	10.9595	4.51837	0.000133611	0.00360278
seq.12848.9	ARHGEF2	-0.345295	11.0399	-4.51358	0.000134077	0.00360278
seq.13936.24	PGK2	-0.443085	9.74086	-4.51895	0.000133413	0.00360278
seq.12428.2	LYPLAL1	-0.212501	10.3028	-4.50359	0.000137578	0.003682
seq.4543.65	COL23A1	-0.356531	10.0404	-4.50087	0.000139484	0.00370588
seq.18405.117	AP1S2	-0.401088	11.3672	-4.49799	0.000139582	0.00370588
seq.17678.28	VSIG4	0.741138	11.8341	4.49267	0.000142756	0.00377511
seq.12569.25	CCT5	-1.01121	15.3954	-4.48961	0.000143884	0.00378989
seq.2695.25	PECAM1	0.432267	10.8387	4.48142	0.000146729	0.00382062
seq.18316.75	SEPTIN3	0.220824	10.3432	4.47932	0.000146469	0.00382062
seq.25296.3	AMOT	-0.455221	9.95862	-4.4819	0.000146771	0.00382062
seq.5178.5	PDE7A	0.196428	8.3296	4.47359	0.000148651	0.00384509
seq.12798.46	SLC4A8	-0.348709	9.49801	-4.4764	0.000148865	0.00384509
seq.4156.74	TGFB2	0.230451	8.78015	4.46987	0.000150085	0.00386165
seq.19482.11	HDHD3	-0.382996	11.9219	-4.46683	0.000151266	0.00387707
seq.21138.2	NPM2	0.334908	8.52675	4.46433	0.000153565	0.00391552
seq.24909.40	PLCD1	-0.694891	12.2962	-4.46338	0.000153942	0.00391552
seq.22129.55	ELL3	0.21602	8.89837	4.45605	0.000155536	0.00393062
seq.21430.4	PLA2G4A	-0.913261	12.145	-4.45893	0.000155715	0.00393062
seq.9765.4	NDE1	-0.356452	10.3685	-4.45347	0.000157153	0.00394279
seq.10552.88	KLRC4	-0.369946	9.73237	-4.45334	0.000157972	0.00394279
seq.14123.34	VSIR	-0.569222	12.5939	-4.4512	0.000157494	0.00394279
seq.5870.23	BAD	-0.944342	12.6367	-4.44833	0.000160025	0.00397913
seq.9102.28	ZFYVE27	1.16584	12.0964	4.44372	0.000161934	0.00401127
seq.19242.21	PFDN1	0.312493	10.4876	4.43759	0.000163123	0.00401127
seq.6603.18	ANOS1	-0.385348	11.3466	-4.43816	0.000162881	0.00401127
seq.3312.64	FCGR1A	0.256026	9.23321	4.43532	0.000164173	0.00402224
seq.6414.8	OAF	0.435357	12.9569	4.42969	0.000166482	0.00406387
seq.21698.11	ITGA11|ITGB1	-0.3315	9.85453	-4.42821	0.0001682	0.0040799
seq.8780.2	PCDH10	-0.530868	11.9021	-4.4257	0.000168363	0.0040799
seq.6472.40	PMEL	-0.760718	12.0616	-4.42362	0.000170538	0.00411762
seq.20913.27	EIF1	0.931438	12.6625	4.41665	0.000173624	0.00416367
seq.9786.310	IER3	0.374765	10.8299	4.41347	0.000173694	0.00416367
seq.2949.6	PLA2G10	0.341541	10.2482	4.41193	0.000174895	0.00417741
seq.12676.1	PACSIN1	1.64022	11.1457	4.40948	0.000176857	0.00418775
seq.7152.5	HAVCR2	0.273762	11.7484	4.40547	0.000177213	0.00418775
seq.3041.55	MRC2	-0.543144	12.6123	-4.40763	0.000176227	0.00418775
seq.3739.72	ITGA2B|ITGB3	-0.971217	15.2998	-4.40492	0.000178949	0.00421383
seq.5612.16	HINT2	-0.68939	11.4003	-4.4016	0.000180484	0.00423501
seq.12534.10	CALCOCO2	-0.251894	11.891	-4.39407	0.0001825	0.00426731
seq.12400.25	UBE2T	-0.2699	10.2673	-4.39196	0.000183495	0.00427557
seq.25433.25	NSUN6	-0.490493	10.7772	-4.38832	0.000186761	0.00433651
seq.8864.59	CENPW	-0.350028	10.5694	-4.38294	0.000187976	0.00434954
seq.7092.7	PDILT	0.292497	9.88142	4.37148	0.000193556	0.00444779
seq.12632.14	NAT1	-0.348865	10.8924	-4.37229	0.000193044	0.00444779
seq.17511.10	RPP30	-0.241024	10.807	-4.3673	0.000195542	0.00447797
seq.14132.21	HHLA2	0.36129	9.40033	4.36106	0.000200332	0.00455955
seq.12514.16	METTL1	0.246074	10.3905	4.35632	0.000201157	0.00455955
seq.14019.73	EVPL	0.170022	10.3888	4.35741	0.00020059	0.00455955
seq.12041.33	HSPA1L	0.346497	9.58396	4.35087	0.000205655	0.00461442
seq.2649.77	ICAM3	0.336139	10.9264	4.34885	0.000205067	0.00461442
seq.7246.4	FREM2	0.166644	9.04248	4.34828	0.000205368	0.00461442
seq.16322.10	MZB1	0.6778	13.8974	4.33905	0.000210313	0.0047031
seq.2597.8	VEGFA	0.487031	12.7681	4.33478	0.000212641	0.00473927
seq.19437.61	VEGFA	0.634298	10.1571	4.32961	0.000217216	0.00482508
seq.14029.42	COPS2	-0.664424	12.292	-4.32149	0.00022176	0.00490967
seq.18823.52	H2BU1	1.56896	11.1307	4.3171	0.000224313	0.0049367
seq.5091.28	LILRB2	0.625107	12.9759	4.31373	0.000224681	0.0049367
seq.7948.129	GLTPD2	0.409041	9.43391	4.31429	0.000225944	0.0049367
seq.4900.8	C3	0.407437	17.3548	4.31249	0.000225207	0.0049367
seq.2570.72	IGFBP2	1.10543	12.0828	4.30437	0.000231779	0.00501487
seq.3864.5	RPS7	0.42969	9.85038	4.30601	0.000230806	0.00501487
seq.13988.67	NMRAL1	-0.739573	11.3651	-4.30534	0.000231204	0.00501487
seq.18403.25	AMPD2	1.61695	10.3703	4.2867	0.000242551	0.00522215
seq.8819.3	IGFBP2	1.1567	13.6822	4.28485	0.000243711	0.00522215
seq.23183.6	RNF31	-0.904003	11.4378	-4.2852	0.000243486	0.00522215
seq.11425.31	RUFY1	-0.586215	12.3408	-4.27973	0.000245829	0.00525066
seq.6289.78	ARHGAP36	0.462366	9.61859	4.26768	0.000254701	0.00539694
seq.25118.45	BICD1	-0.468909	12.606	-4.26409	0.000255107	0.00539694
seq.12575.30	MTHFD1	-0.832994	14.7239	-4.26859	0.000254109	0.00539694
seq.8850.5	PLA2G2C	0.231046	10.1998	4.26205	0.000256447	0.00540811
seq.21604.2	CUTA	0.397269	10.3125	4.26096	0.00025914	0.00544766
seq.8697.38	GPC1	-0.373098	11.9948	-4.2506	0.00026412	0.00553489
seq.5749.53	CLPS	0.334798	8.67301	4.24611	0.000269219	0.00562406
seq.11163.7	FAM162B	0.207793	10.9376	4.22462	0.000282381	0.00588058
seq.21319.196	MRM1	-0.519849	8.37315	-4.22595	0.000283526	0.00588275
seq.13654.1	ROCK2	-1.04047	12.2245	-4.22496	0.000284251	0.00588275
seq.9796.4	CEL	1.56836	11.1029	4.22187	0.000286514	0.00590737
seq.23621.326	TIMM13	0.361672	11.1429	4.21802	0.000287213	0.00590737
seq.9207.60	CRYZL1	0.576013	9.64017	4.2177	0.000289594	0.00593801
seq.23543.92	TRUB1	-1.07348	12.363	-4.21644	0.000290533	0.00593899
seq.3189.61	TMPRSS15	0.242305	8.94332	4.20981	0.000293574	0.00598281
seq.15594.47	HTRA1	0.5843	14.0782	4.19943	0.000301279	0.00612111
seq.12708.91	L3MBTL2	-0.622474	10.946	-4.19411	0.000307675	0.00621316
seq.19295.32	PPP1CC	-0.942416	16.1518	-4.19481	0.000307126	0.00621316
seq.21999.61	NUCB2	0.168586	9.8443	4.18787	0.000310368	0.00624861
seq.15542.19	CKMT1A	1.61279	13.7361	4.18756	0.000312887	0.00628036
seq.3357.67	CDK2|CCNA2	0.265166	9.12769	4.18231	0.00031595	0.00632279
seq.9078.207	SNTB1	-1.25849	14.1275	-4.18215	0.000317264	0.00633008
seq.7939.1	SLC66A1L	-0.296488	10.2616	-4.17703	0.0003193	0.00635169
seq.19122.47	MYL12B	-0.444034	10.285	-4.17663	0.000321794	0.00638224
seq.5882.34	EEF1B2	-0.586242	9.03882	-4.17473	0.000323362	0.00639432
seq.8748.45	CD74	-0.191166	9.73539	-4.16842	0.000326283	0.00643298
seq.4150.75	PLG	0.306907	11.0353	4.16704	0.000327435	0.00643667
seq.2781.63	CCL4L1	0.495984	9.02882	4.1624	0.000333752	0.00648433
seq.10045.47	CUL3	0.477018	9.8027	4.16548	0.000331127	0.00648433
seq.5822.22	GDNF	0.199299	9.08296	4.16025	0.000333205	0.00648433
seq.21817.5	MYL9	-0.811074	14.6622	-4.16423	0.000332193	0.00648433
seq.2635.61	LAYN	0.397318	11.3574	4.15559	0.000337458	0.00651832
seq.3823.9	MATK	0.29524	8.85135	4.15878	0.000336865	0.00651832
seq.3341.33	ABL1	0.159562	8.98479	4.15192	0.000340412	0.00655637
seq.22371.46	FAM110A	-0.637197	11.8696	-4.1527	0.000342156	0.00657098
seq.4125.52	AGER	1.74175	10.6276	4.15084	0.000343794	0.00658346
seq.18893.26	ADGRG1	0.317656	10.6033	4.14359	0.00034777	0.00664051
seq.13552.7	SWAP70	0.645757	11.2567	4.13504	0.000358006	0.00679701
seq.21540.73	BIN2	-0.675627	16.9379	-4.13383	0.000357818	0.00679701
seq.5708.1	LEAP2	0.897485	13.952	4.13318	0.000359724	0.00681023
seq.2692.74	PLA2G2A	1.72657	10.8337	4.12492	0.00036742	0.00693622
seq.25292.4	CES3	-0.705963	16.0674	-4.12282	0.00036856	0.00693809
seq.9836.20	DCK	-0.292508	12.5869	-4.11475	0.000374498	0.00701026
seq.17384.110	PFKM	-0.827324	13.4692	-4.11807	0.000373918	0.00701026
seq.5675.6	TNC	0.583484	12.5717	4.11224	0.000377521	0.00702738
seq.3591.51	CDH6	-0.601206	12.0401	-4.11525	0.000376637	0.00702738
seq.5633.65	LILRB2	0.434621	9.15323	4.10743	0.00038426	0.00710705
seq.4332.6	CLEC1B	-0.632099	14.6117	-4.10627	0.000382919	0.00710705
seq.24211.25	HMGCL	-1.06968	11.2068	-4.10667	0.000385001	0.00710705
seq.15499.11	ATRN	-0.301915	10.1909	-4.10028	0.000389288	0.00716634
seq.22120.4	DCAF11	-0.257202	10.5716	-4.09698	0.000391974	0.00717615
seq.16805.5	PDE5A	-0.929971	16.2964	-4.09993	0.000391709	0.00717615
seq.3440.7	GZMA	0.455935	11.7236	4.09303	0.000396243	0.007195
seq.4453.83	LRRTM3	0.304477	8.18952	4.09559	0.000396085	0.007195
seq.25099.4	CADPS2	0.211407	9.79432	4.09276	0.000396237	0.007195
seq.24454.27	MTHFD2L	-0.613693	9.85281	-4.09294	0.000398788	0.00722154
seq.17737.7	IVD	-1.2139	14.1864	-4.08853	0.000403312	0.00728366
seq.23771.17	ATF5	0.225867	9.31472	4.08402	0.000405219	0.00729833
seq.12408.333	RAB22A	-0.712694	11.2004	-4.08368	0.000408352	0.00733493
seq.19574.5	ITGA2B|ITGB3	-1.03529	14.1948	-4.08141	0.000410731	0.00735783
seq.17319.1	SELENOH	0.503723	9.60404	4.07915	0.000413114	0.00736094
seq.12537.88	PURA	-0.737293	12.2673	-4.07982	0.000412407	0.00736094
seq.23148.100	LIPG	0.625589	10.7855	4.07111	0.000421701	0.00743443
seq.3191.50	WFIKKN1	0.328707	9.45103	4.07131	0.000421491	0.00743443
seq.17816.58	NCALD	-0.641151	12.2412	-4.07181	0.000420954	0.00743443
seq.12560.9	NT5C	-0.667779	11.8643	-4.07175	0.000421019	0.00743443
seq.9250.87	DEFA1	0.85969	11.9794	4.0696	0.000423337	0.00744358
seq.19438.68	SYF2	-0.298839	11.9894	-4.0651	0.000425361	0.00745949
seq.3897.61	PDXP	-0.985388	12.6768	-4.05594	0.000438398	0.00766793
seq.3622.33	LGMN	0.282569	11.4368	4.0502	0.000441926	0.00770942
seq.6973.111	IGF2	-0.504648	12.1438	-4.04353	0.000450021	0.00783012
seq.23903.3	GOT2	-0.998097	12.6078	-4.04336	0.000452737	0.00785687
seq.21160.4	CHMP6	-0.48886	11.9063	-4.0402	0.000454384	0.00786497
seq.14049.17	IL7	0.381394	9.43909	4.03649	0.000460753	0.007934
seq.8060.7	NRG2	0.275969	7.88152	4.03592	0.000459658	0.007934
seq.24474.12	TTC9	-1.06694	11.5159	-4.03152	0.00046665	0.00801483
seq.23349.5	PCYT1A	0.33517	10.548	4.02219	0.000476091	0.00807328
seq.17468.1	SUFU	0.291263	10.5778	4.02408	0.000472502	0.00807328
seq.10073.22	TDP1	-0.200702	10.6303	-4.02111	0.00047611	0.00807328
seq.24658.98	CCDC115	-0.262156	9.43991	-4.02385	0.000474073	0.00807328
seq.19563.3	SEZ6L	-0.576865	12.5341	-4.02235	0.000475899	0.00807328
seq.3727.35	PYY	0.624068	10.1347	4.0163	0.000485158	0.00820583
seq.6390.18	NPS	-0.344903	13.2046	-4.00982	0.000490063	0.00826779
seq.21925.15	TGFB1	0.2278	10.9109	4.0078	0.000492603	0.00828966
seq.18206.18	ADH6	-0.744338	13.3304	-4.00046	0.000504669	0.00847132
seq.8042.88	SPINK9	0.493445	9.87423	3.99762	0.000508881	0.00852056
seq.7090.17	GALNT1	0.144543	10.1869	3.98408	0.000523422	0.00874207
seq.5383.14	TNFRSF13C	-0.66473	11.1186	-3.98348	0.000527588	0.00878961
seq.11103.24	HSPB1	-0.948114	11.9795	-3.98002	0.000532272	0.00884554
seq.11638.42	B3GALT2	-0.316323	11.3649	-3.96735	0.000546298	0.00903358
seq.6497.10	RS1	-0.331967	11.0754	-3.96832	0.000544955	0.00903358
seq.10391.1	ANGPTL3	0.568272	10.5753	3.96799	0.000548868	0.00905361
seq.12599.10	FERMT3	-0.825685	15.8523	-3.96701	0.000550239	0.0090538
seq.16620.26	LY75	-0.455144	12.8979	-3.96262	0.000552944	0.00907591
seq.9545.156	GZMK	0.824988	9.87437	3.95292	0.000570373	0.0093161
seq.19209.6	NFKBIA	-0.526494	9.10951	-3.95358	0.000569414	0.0093161
seq.21589.80	DPPA4	0.195967	9.18282	3.94697	0.000575506	0.00937694
seq.8982.65	THBS3	-0.576342	13.5644	-3.94568	0.000577399	0.00938485
seq.9987.30	LRRC25	-0.311759	10.3797	-3.9423	0.000583866	0.00944389
seq.25043.74	OXCT1	-0.971318	14.8549	-3.94417	0.000583252	0.00944389
seq.15569.15	COL2A1	-0.523543	10.9192	-3.94173	0.000586882	0.00944944
seq.3029.52	CD209	-0.746298	11.2658	-3.94162	0.000587045	0.00944944
seq.24676.105	CFAP298	-0.406305	10.0279	-3.93694	0.000594098	0.00953993
seq.6237.11	FGFRL1	0.323458	8.915	3.93406	0.000598472	0.00958706
seq.2443.10	FGF8	0.378145	11.3219	3.9306	0.000600456	0.00959577
seq.20562.78	KLRB1	0.479601	9.94059	3.92718	0.000609059	0.00967156
seq.15494.11	FGFBP1	0.304962	9.14388	3.92686	0.000609552	0.00967156
seq.21378.7	PNPT1	-1.28168	13.0135	-3.92824	0.00060742	0.00967156
seq.24659.6	DNAJB13	-0.322462	11.0361	-3.91354	0.000626776	0.00992122
seq.12406.119	DIRAS3	-0.287228	10.5814	-3.91241	0.000628584	0.00992627
seq.12801.33	IRF2	0.694004	9.75691	3.91314	0.000631239	0.00994462
seq.3867.49	SEZ6L2	-0.697574	10.7777	-3.91134	0.000634145	0.00996685
seq.20458.22	NDUFA2	-0.505107	9.38562	-3.90948	0.000637146	0.00999045
seq.24920.6	GLS	-0.54389	9.70086	-3.90401	0.000646088	0.0101069
seq.2645.54	PRKCZ	0.354274	11.0036	3.89622	0.000655711	0.0101149
seq.11430.49	DTX1	0.333786	11.4966	3.8967	0.000654276	0.0101149
seq.7267.2	SPTLC2	0.308249	10.1108	3.89967	0.000652488	0.0101149
seq.13624.17	NADK	0.286662	9.50052	3.8985	0.000654221	0.0101149
seq.3373.5	GZMH	0.211174	9.12178	3.89978	0.000649166	0.0101149
seq.9772.153	NLGN2	-0.373775	8.56899	-3.9003	0.000652227	0.0101149
seq.6561.77	IGKV1-5	0.413241	10.8076	3.89349	0.000663633	0.0102121
seq.13427.66	MAN1C1	0.328799	9.72244	3.89263	0.000665075	0.0102121
seq.25273.80	CALD1	-0.668651	15.8669	-3.88091	0.000684501	0.0104862
seq.20575.82	CLEC9A	-0.35502	9.14294	-3.87894	0.000688649	0.0105256
seq.11162.37	EQTN	-0.270806	8.62092	-3.87583	0.000693455	0.0105748
seq.7131.207	TNC	0.475892	11.4156	3.87354	0.00069811	0.0105973
seq.11266.8	SELPLG	-0.389596	11.9991	-3.87174	0.000697247	0.0105973
seq.18943.4	PTGR2	0.330606	11.5412	3.86787	0.000704162	0.0106407
seq.9340.17	FKBP14	-0.454288	10.8227	-3.87072	0.000703198	0.0106407
seq.3809.1	FGFR3	0.288531	10.9961	3.86479	0.000709707	0.010676
seq.17823.40	SNRPD2	-0.307708	11.1311	-3.86484	0.000709623	0.010676
seq.2634.2	IL2RG	-0.819614	12.528	-3.86434	0.000714716	0.0107272
seq.2631.50	IL10RB	0.207013	10.598	3.85842	0.000721307	0.0107618
seq.10908.2	GALNT13	-0.284709	10.8434	-3.85812	0.000721868	0.0107618
seq.3806.55	EPHA5	-0.435485	10.2377	-3.86046	0.000721797	0.0107618
seq.8388.24	SPAST	-0.211254	9.60656	-3.84592	0.000744632	0.0110764
seq.3837.6	ZAP70	0.300836	10.2139	3.84258	0.000751988	0.0110868
seq.14039.33	KLK5	0.156167	9.04695	3.84455	0.000747232	0.0110868
seq.8390.25	COX7A1	-0.251087	9.98063	-3.84363	0.000749276	0.0110868
seq.11245.43	FLNA	-0.791136	16.292	-3.84452	0.000751624	0.0110868
seq.21643.8	RPS20	0.507223	10.6188	3.84155	0.000757329	0.011092
seq.5682.13	VASN	-0.318189	10.8537	-3.84042	0.000755417	0.011092
seq.12490.92	LAMTOR3	-0.33356	11.102	-3.83951	0.00075688	0.011092
seq.9037.1	STX18	-0.22759	10.2525	-3.8325	0.000770488	0.0112516
seq.2999.6	LSAMP	-0.289837	10.4624	-3.83193	0.000771603	0.0112516
seq.15457.14	ANPEP	1.11818	11.6443	3.82977	0.000780323	0.011309
seq.12554.10	RAD51D	-0.711969	11.3006	-3.82961	0.000780631	0.011309
seq.18300.39	PURB	-0.972794	14.0184	-3.8307	0.000778486	0.011309
seq.12735.39	CSDE1	-0.395864	10.471	-3.8281	0.000783643	0.011328
seq.25412.53	FXYD6	0.377134	8.30856	3.82716	0.000785512	0.0113304
seq.9970.7	UBXN4	-0.364252	9.82601	-3.82162	0.000796633	0.011425
seq.8299.66	LILRA4	-0.512773	11.6295	-3.82274	0.000794383	0.011425
seq.9843.5	ACTN1	-1.17917	13.9935	-3.82133	0.000797214	0.011425
seq.11441.11	PYGL	-0.549329	14.5838	-3.81518	0.000805184	0.0115145
seq.10546.2	TSPEAR	0.532703	10.2446	3.81225	0.000815815	0.0115919
seq.12594.5	GCA	-0.353253	10.1957	-3.81236	0.000815574	0.0115919
seq.20550.38	NTM	-0.434141	13.2823	-3.8113	0.00081317	0.0115919
seq.2809.25	ADAMTS4	0.179203	7.73395	3.80865	0.000818663	0.0116076
seq.9197.4	LGALS9	0.320528	10.6554	3.80686	0.00082314	0.0116463
seq.5301.7	CCL11	0.499504	12.6714	3.80052	0.00083575	0.0117499
seq.5534.49	TNFRSF10B	0.303254	9.58023	3.8034	0.000834339	0.0117499
seq.2603.61	CD80	0.205776	10.1533	3.80173	0.000833167	0.0117499
seq.13497.34	EIF3J	1.00608	12.7043	3.80079	0.000839881	0.0117583
seq.3390.72	PIK3CA|PIK3R1	-0.693712	11.1533	-3.80089	0.000839651	0.0117583
seq.12934.1	HERC5	-0.318845	10.6991	-3.79411	0.000850553	0.0118828
seq.7141.21	MGAT4B	0.342929	12.0062	3.78657	0.000865866	0.0119615
seq.14158.17	ANXA5	-0.319187	9.97862	-3.78948	0.000863871	0.0119615
seq.22476.115	HOXD4	-0.354885	10.2818	-3.78997	0.000863225	0.0119615
seq.19601.15	ASB9	-0.684666	12.7567	-3.78877	0.000865851	0.0119615
seq.12817.1	GEM	-0.915844	12.4439	-3.78827	0.000866955	0.0119615
seq.19254.125	GMPR	-1.30325	15.1441	-3.79162	0.000859626	0.0119615
seq.17514.48	RAB21	-0.747248	16.2508	-3.78638	0.000871124	0.0119942
seq.7211.2	RNASE1	0.550853	8.81441	3.78511	0.00087394	0.0120081
seq.2644.11	PRKCA	-1.12698	15.3752	-3.7778	0.000890274	0.0122074
seq.18322.15	JMJD6	-0.38283	10.4688	-3.76831	0.00091192	0.0124785
seq.5807.77	CD70	0.205258	8.84545	3.76396	0.000917005	0.0125224
seq.12442.4	RHOD	-0.204671	8.52679	-3.75943	0.00092759	0.012641
seq.6367.66	FMOD	-0.600751	15.503	-3.75675	0.000935922	0.0127285
seq.7933.75	ADAM22	-0.52556	12.5395	-3.75494	0.00093974	0.0127544
seq.4482.66	C5|C6	0.218583	10.8896	3.753	0.000942838	0.0127705
seq.6572.10	LRRTM4	-0.227018	9.98337	-3.74597	0.000959798	0.0129738
seq.21940.12	WNT10B	0.40749	10.8547	3.74514	0.000967001	0.0130447
seq.22402.12	H2AC1	1.17686	11.0022	3.74144	0.000976093	0.0130799
seq.7962.11	SPINK8	-0.343639	9.51686	-3.74137	0.000976279	0.0130799
seq.4979.34	DPT	-0.400657	10.9475	-3.74054	0.000977458	0.0130799
seq.14072.9	TPT1	-0.418263	12.4639	-3.74038	0.000973478	0.0130799
seq.24407.31	KIF3C	0.395443	11.6285	3.73621	0.000984387	0.0131223
seq.7921.65	FJX1	0.27836	10.7694	3.73577	0.000984915	0.0131223
seq.13459.30	TOR4A	-0.629256	10.6918	-3.73724	0.000986535	0.0131223
seq.19274.80	SNTA1	-1.45159	13.3579	-3.73611	0.000989347	0.0131335
seq.18236.3	LGALSL	-0.733062	15.3804	-3.73501	0.000992103	0.0131439
seq.14125.5	APOM	-0.298441	9.54153	-3.73282	0.000997617	0.0131646
seq.19271.64	GNAI1	-0.476635	10.4739	-3.73322	0.000996603	0.0131646
seq.4144.13	CCL13	0.246489	8.50026	3.72974	0.00100358	0.0131843
seq.2737.22	CCN3	0.184031	10.5305	3.72828	0.00100377	0.0131843
seq.6557.50	LRRC15	-0.823131	12.6213	-3.72988	0.00100505	0.0131843
seq.8079.39	EID3	0.22201	8.47772	3.7263	0.0010092	0.0132062
seq.10977.55	UCMA	-0.235875	11.0522	-3.72557	0.00101068	0.0132062
seq.7203.125	RFNG	0.197144	10.9663	3.72164	0.00102078	0.0132861
seq.24905.22	EOLA1	-0.384881	9.36282	-3.7242	0.00101958	0.0132861
seq.11122.97	SPG21	-0.791694	11.3128	-3.72137	0.00102692	0.0133399
seq.3438.10	FSTL3	0.35832	12.0433	3.71759	0.00103129	0.0133525
seq.3473.78	MPL	-0.573144	8.96399	-3.71945	0.00103189	0.0133525
seq.7863.50	PGRMC1	-0.784463	14.3158	-3.71379	0.00104675	0.0134924
seq.17856.23	NT5M	-0.98375	10.861	-3.71447	0.00104498	0.0134924
seq.2632.5	IL12RB1	0.262375	9.95276	3.71099	0.00105088	0.0135194
seq.5228.25	KIF23	-0.63458	9.69676	-3.70864	0.00106047	0.0136166
seq.2732.58	NANOG	0.242486	8.19631	3.70287	0.00107288	0.0137494
seq.25967.34	TIMP1	0.436527	15.1041	3.69827	0.00108295	0.013829
seq.10012.5	SPDEF	0.307522	11.263	3.69816	0.00108325	0.013829
seq.20134.27	MARCO	0.503249	7.3533	3.69917	0.00108614	0.0138395
seq.25265.8	FNBP1	1.20398	11.0217	3.69749	0.00109074	0.0138716
seq.19373.3	MYL12A	-0.710326	12.8844	-3.69622	0.00109424	0.0138896
seq.4440.15	FCRL3	0.250333	10.4451	3.69203	0.00110018	0.0139119
seq.11328.9	USB1	0.148448	8.32859	3.69241	0.0010991	0.0139119
seq.13431.74	SHISAL2A	0.475044	8.38192	3.69269	0.00110405	0.0139344
seq.17466.72	ACSF2	-0.861055	11.0057	-3.6873	0.00111917	0.0140986
seq.4973.18	BIRC3	-0.220889	8.7992	-3.6844	0.00112392	0.0141317
seq.21911.17	NDP	0.461075	9.54356	3.68374	0.00112927	0.0141456
seq.21193.1	TFB2M	-0.553236	9.59163	-3.68404	0.00112841	0.0141456
seq.4163.5	H2AZ1	0.201215	9.59941	3.68024	0.00113344	0.0141712
seq.24968.10	TIAM2	0.159443	9.70566	3.67849	0.00113845	0.0142071
seq.7756.37	KLRF1	-0.233792	9.86521	-3.67464	0.00114998	0.0142443
seq.10037.98	SIGLEC12	-0.283388	8.92397	-3.67712	0.00114827	0.0142443
seq.22405.61	PCK2	-0.396503	9.96228	-3.67664	0.00114967	0.0142443
seq.10339.48	ENO2	-0.867878	12.5988	-3.67699	0.00114865	0.0142443
seq.3503.4	ITGA1|ITGB1	-0.849785	15.1818	-3.6747	0.00115529	0.0142836
seq.8289.8	GPNMB	-0.29139	9.92368	-3.67087	0.00116553	0.0143835
seq.7965.25	HBQ1	0.396014	11.9282	3.66553	0.00117633	0.0144899
seq.5384.67	BRF1	0.290626	11.9641	3.66329	0.00118299	0.0145451
seq.3874.8	UBE2L3	-0.734035	11.7358	-3.66106	0.00119571	0.0146744
seq.21614.2	GEMIN6	0.189707	10.1631	3.65584	0.00120543	0.0147665
seq.22773.69	SDHB	-0.697061	11.7698	-3.65705	0.00120786	0.0147691
seq.7194.36	NPTN	-0.660299	13.859	-3.65416	0.0012144	0.0148219
seq.24414.3	PYGB	-0.894055	15.6443	-3.65354	0.00121855	0.0148454
seq.18875.125	COL2A1	-1.08793	14.4722	-3.65157	0.00122463	0.0148923
seq.3535.84	DKK1	0.433217	13.9687	3.64419	0.00124138	0.015041
seq.12515.45	UCK2	-0.366187	10.6821	-3.64683	0.00123933	0.015041
seq.2670.67	CKM	-0.636144	10.005	-3.63996	0.00126096	0.0152505
seq.6653.58	CD47	-0.266169	10.2892	-3.63598	0.00126808	0.0152833
seq.20243.26	PFN1	-0.484849	16.3922	-3.63515	0.00127	0.0152833
seq.12395.86	DARS2	-1.23418	14.4326	-3.63695	0.00127055	0.0152833
seq.15343.337	KNG1	0.505635	12.1155	3.63522	0.00127374	0.0152941
seq.7054.87	CLEC2D	0.267847	11.6097	3.63322	0.0012762	0.015296
seq.9218.7	FAS	-0.242673	9.27977	-3.63198	0.00128446	0.0153674
seq.21327.12	CYREN	0.223578	8.31562	3.63037	0.00128803	0.015376
seq.25437.18	ANKMY2	0.219318	9.98064	3.62901	0.0012898	0.015376
seq.25262.6	ZW10	0.40101	12.8938	3.62738	0.00129508	0.0154114
seq.7071.23	MAN1B1	0.162557	11.1831	3.6256	0.00130091	0.0154533
seq.8336.267	GRAMD1C	0.142859	10.3668	3.62429	0.00130521	0.0154767
seq.13717.15	FCN2	0.633603	14.4833	3.62356	0.00131254	0.0154868
seq.23322.2	MSC	0.429521	12.8001	3.61939	0.00132141	0.0154868
seq.4280.47	PSMA2	0.344787	9.47171	3.62039	0.00132459	0.0154868
seq.25253.17	GNAS|GNAS	0.165683	10.4603	3.61842	0.00132465	0.0154868
seq.9983.97	PRSS35	-0.276273	10.1796	-3.62073	0.00131934	0.0154868
seq.25059.18	HDAC6	-0.303389	10.7692	-3.61918	0.00132281	0.0154868
seq.14205.6	HEXIM2	-0.870194	10.7335	-3.62472	0.00131024	0.0154868
seq.12529.32	FKBP6	-0.886729	12.0517	-3.62129	0.00132159	0.0154868
seq.2876.74	TOP1	0.740737	9.74137	3.61916	0.00132867	0.0155066
seq.20534.6	SCARB1	0.650177	10.7581	3.61245	0.00135128	0.0155933
seq.25960.15	PLS3	0.41998	12.1711	3.60834	0.0013587	0.0155933
seq.9284.25	SFRP4	0.229629	11.3158	3.60864	0.00135766	0.0155933
seq.19196.73	HOPX	-0.240888	11.1717	-3.61079	0.00135032	0.0155933
seq.5109.24	NRCAM	-0.371844	9.73197	-3.61146	0.00135465	0.0155933
seq.19135.5	NT5C3B	-0.423008	10.8875	-3.61344	0.00134792	0.0155933
seq.17156.72	DCLK1	-0.47634	11.8343	-3.61182	0.0013496	0.0155933
seq.19361.78	MATN3	-0.596641	15.1256	-3.61184	0.0013493	0.0155933
seq.19223.6	RAB1A	-0.743401	15.0324	-3.61004	0.0013595	0.0155933
seq.25444.29	INPP5A	-0.98611	14.5998	-3.61468	0.00134374	0.0155933
seq.12581.39	IMPA2	-0.278644	9.57208	-3.60819	0.00136583	0.015639
seq.23570.87	ZKSCAN7	0.190848	9.49775	3.60535	0.00136893	0.0156477
seq.13597.20	RAB31	-0.939479	13.0118	-3.60279	0.00138448	0.0157982
seq.15534.26	MDH2	-0.983077	16.1133	-3.60052	0.00139238	0.0158613
seq.7245.2	CELF2	0.690103	11.7811	3.5959	0.00140862	0.0159514
seq.16300.4	TREM2	0.519724	12.3662	3.59408	0.00140987	0.0159514
seq.2813.11	AGRP	0.435268	10.1478	3.5968	0.00140545	0.0159514
seq.20441.35	POLR2E	-0.422832	10.624	-3.59748	0.00140307	0.0159514
seq.3038.9	CXCL11	1.26699	12.7669	3.59182	0.00142315	0.0160472
seq.13236.25	WNT3A	-0.556587	12.4361	-3.59225	0.00142144	0.0160472
seq.3044.3	CCL18	0.429075	16.4863	3.58706	0.00143338	0.0160808
seq.14061.48	TNFSF11	0.270482	10.6929	3.58829	0.00142893	0.0160808
seq.2704.74	TNFRSF13B	0.256704	10.1935	3.58785	0.00143128	0.0160808
seq.12617.2	STK24	-0.793618	15.812	-3.58729	0.00143942	0.016114
seq.5256.86	PDE5A	-0.813647	13.9837	-3.5868	0.00144117	0.016114
seq.19803.34	RBP2	-0.43639	11.5703	-3.58568	0.00144376	0.0161159
seq.4468.21	SPHK2	-0.138851	9.92731	-3.58346	0.00144638	0.0161182
seq.3521.16	CGA|TSHB	0.561233	10.1118	3.57454	0.00148618	0.016534
seq.8878.48	YTHDC1	0.177786	9.56847	3.57191	0.00148898	0.0165376
seq.3797.1	CDH2	0.230419	10.2287	3.56865	0.00150123	0.0166459
seq.3603.60	CLEC7A	0.227286	10.4753	3.56698	0.00150753	0.016688
seq.12700.9	ACLY	-0.267212	10.7421	-3.56399	0.00151887	0.0167302
seq.21939.6	NAE1|UBA3	-0.698226	13.7058	-3.56647	0.00151655	0.0167302
seq.17370.186	ABHD10	-1.11008	11.8046	-3.56704	0.00151441	0.0167302
seq.23020.18	RGS4	0.446312	10.278	3.56436	0.00152462	0.0167658
seq.3427.63	CSNK2A1	0.252391	8.74073	3.55889	0.00154549	0.0169115
seq.20512.2	MCAM	-0.269886	10.5953	-3.55719	0.00154501	0.0169115
seq.4130.71	FGF6	-0.446585	9.50421	-3.55903	0.00154512	0.0169115
seq.13678.169	CFD	-0.542413	14.4959	-3.55419	0.00155668	0.0170061
seq.7780.34	MZB1	0.428544	10.5242	3.55538	0.00155929	0.0170067
seq.8263.64	TYMSOS	-0.259549	11.4828	-3.55094	0.00156941	0.0170892
seq.7227.75	COCH	0.554041	14.0256	3.54784	0.00158322	0.0171031
seq.11319.106	MRE11	-0.502331	11.8762	-3.54933	0.00158191	0.0171031
seq.23915.18	RAB7A	-0.622678	16.0489	-3.55062	0.00157702	0.0171031
seq.25266.14	OSBPL1A	-0.824819	11.659	-3.54993	0.00158074	0.0171031
seq.22970.8	GIPC1	-0.838623	12.4922	-3.54923	0.00158352	0.0171031
seq.12351.25	STAT1	-0.633561	16.4437	-3.54693	0.00159166	0.0171631
seq.22512.18	NGDN	0.22771	10.0864	3.54438	0.00159544	0.0171721
seq.25486.38	MRPL38	-0.295443	9.31009	-3.54568	0.00159765	0.0171721
seq.12675.14	DARS1	-0.740032	16.8185	-3.5424	0.00161081	0.0172857
seq.5897.58	GRP	0.167643	8.40432	3.53783	0.00162184	0.0173483
seq.12916.3	MTCP1	-0.210612	9.84663	-3.53829	0.00161999	0.0173483
seq.24689.9	CAVIN1	0.751094	11.0816	3.53902	0.00162448	0.0173486
seq.18338.26	IDH1	-0.80828	15.5369	-3.53737	0.00163122	0.0173928
seq.25902.27	GLUD1	0.947797	10.5201	3.53374	0.00164611	0.0174955
seq.12355.223	MRRF	-0.22595	11.3617	-3.53197	0.00164587	0.0174955
seq.21883.17	BMP5	0.353631	13.4042	3.52871	0.00165933	0.01758
seq.19109.32	TCEAL8	-0.298693	9.58434	-3.53071	0.00165863	0.01758
seq.6054.6	NXPH3	0.189982	10.9849	3.52502	0.00167473	0.0176942
seq.2982.82	LGALS4	-0.218812	9.82394	-3.52492	0.00167543	0.0176942
seq.3654.27	BMPER	0.199883	8.64551	3.52381	0.00168037	0.017704
seq.20087.3	SELENOF	-0.332125	13.2588	-3.52326	0.00168215	0.017704
seq.3340.53	THBS4	-0.439971	14.6311	-3.52274	0.00168432	0.017704
seq.23602.35	NAPEPLD	-0.255421	9.7	-3.52085	0.00169705	0.0178097
seq.2853.68	CHEK1	0.252953	9.96141	3.51875	0.0017043	0.0178577
seq.6055.53	IFNAR1	0.473475	13.461	3.51353	0.00172362	0.017949
seq.17152.10	KIR2DS4	0.142922	9.54886	3.51485	0.00171791	0.017949
seq.22049.24	YWHAH	-0.534956	17.12	-3.51454	0.00172252	0.017949
seq.18407.36	ARL2BP	-0.595035	11.3202	-3.51529	0.00172379	0.017949
seq.8606.39	GPNMB	-0.342906	9.39523	-3.51387	0.00172992	0.0179847
seq.12834.3	KCNF1	-0.197451	10.8915	-3.51034	0.00173742	0.0180181
seq.24907.3	PMPCA	-0.36427	11.7132	-3.51008	0.00173854	0.0180181
seq.19199.3	POLR2J	-0.184662	9.83751	-3.50732	0.00175058	0.0180941
seq.4987.17	FCAR	-0.254336	10.1135	-3.50787	0.00175131	0.0180941
seq.6941.11	SUMF1	0.384932	10.3828	3.50755	0.00175748	0.0181298
seq.4389.2	DHH	-0.606962	9.74638	-3.50394	0.00177339	0.0182656
seq.2431.17	CTSG	0.712303	11.041	3.49951	0.0017931	0.018271
seq.5604.30	HPSE	0.508059	9.73318	3.50067	0.00178793	0.018271
seq.22792.21	WARS2	0.427499	11.1681	3.50049	0.00178873	0.018271
seq.6986.17	HS3ST3B1	0.234541	9.84238	3.49966	0.00178666	0.018271
seq.3736.60	BMP6	0.222172	10.639	3.4991	0.00178696	0.018271
seq.10907.116	NTM	-0.530107	13.987	-3.49787	0.00179301	0.018271
seq.11955.1	ARHGAP1	-0.741077	11.4473	-3.5024	0.00178022	0.018271
seq.25094.9	ACSS2	-0.500597	12.4797	-3.49623	0.00180333	0.0183471
seq.3522.57	VIP	-0.379815	8.33163	-3.49576	0.00180998	0.0183867
seq.14129.1	IFNA7	0.206866	8.96207	3.48864	0.00183428	0.0185942
seq.15608.5	RPS6KB1	-0.709455	11.466	-3.49004	0.00183598	0.0185942
seq.20159.1	NRN1L	0.415244	10.5688	3.48748	0.00184772	0.0186143
seq.5632.6	CRTAC1	-0.51284	10.6277	-3.48723	0.00184891	0.0186143
seq.10053.5	ILK	-0.78962	14.3178	-3.48718	0.00184914	0.0186143
seq.12628.31	LANCL2	-0.919143	14.1115	-3.48827	0.00184411	0.0186143
seq.11353.143	SMAD2	-0.205754	11.4811	-3.48388	0.00185619	0.0186484
seq.10521.10	MXRA8	-0.33607	9.2941	-3.48403	0.00186372	0.0186484
seq.8428.102	NTM	-0.468301	11.9957	-3.48358	0.00186301	0.0186484
seq.3905.62	UBE2N	-0.516054	16.6042	-3.48255	0.00186324	0.0186484
seq.14696.45	TPSB2	0.299147	9.55619	3.48203	0.00187303	0.0187089
seq.7249.307	BCL2L10	0.25337	10.4762	3.47932	0.00187747	0.0187089
seq.9793.145	IGDCC4	-0.487385	10.4351	-3.48093	0.00187819	0.0187089
seq.9875.107	THOC1	0.26306	10.3885	3.4768	0.00189021	0.0187725
seq.9783.75	DNAJC11	0.169637	10.4061	3.4769	0.00188884	0.0187725
seq.9789.52	SYNE2	-0.775835	12.7574	-3.47633	0.00189985	0.0188402
seq.18342.2	PSAT1	0.511401	12.7894	3.47278	0.00191089	0.0189215
seq.8889.5	CCPG1	-0.199868	10.8867	-3.47149	0.00191454	0.0189216
seq.15322.35	CRADD	-0.565857	12.3158	-3.47281	0.00191658	0.0189216
seq.3143.3	CD4	0.228997	9.67655	3.46869	0.00193143	0.0190037
seq.19148.58	TIMM8A	-0.724219	9.47771	-3.46929	0.00193345	0.0190037
seq.3845.51	DYNLRB1	-0.836454	13.8886	-3.47035	0.00192838	0.0190037
seq.6649.51	NTN1	0.157193	8.6144	3.46646	0.00193871	0.0190274
seq.11135.5	MRPL55	0.426881	8.7434	3.46673	0.00194581	0.0190402
seq.12504.26	LMOD1	0.230717	11.153	3.46442	0.00194859	0.0190402
seq.8298.8	SSMEM1	-0.972884	13.487	-3.46731	0.00194304	0.0190402
seq.18188.12	GATM	-1.07721	13.4234	-3.46105	0.00197356	0.0192559
seq.17738.7	CRNN	-0.489635	10.5406	-3.45997	0.00197887	0.0192795
seq.12533.135	CYTH2	0.158033	9.78602	3.45647	0.00198758	0.0193361
seq.11204.80	CXADR	0.387161	11.4361	3.45584	0.00199431	0.0193451
seq.6359.50	POMGNT2	-0.430963	10.2248	-3.45697	0.0019937	0.0193451
seq.22403.13	H2BC12	1.0751	9.48219	3.45548	0.00200113	0.0193831
seq.4393.3	FGF16	-0.778742	11.972	-3.45379	0.00200954	0.0194362
seq.7003.4	GALNT10	0.214162	9.66679	3.4398	0.0020719	0.0200103
seq.18336.31	CDA	0.484627	11.1709	3.44081	0.00207551	0.0200163
seq.4128.27	CCL24	0.219075	9.34796	3.43819	0.00208392	0.0200454
seq.8866.53	QPCTL	-0.326442	12.5422	-3.43735	0.00208455	0.0200454
seq.12872.35	CNGA2	-0.198369	9.58166	-3.43475	0.00209812	0.0201193
seq.5248.68	PPIF	-0.970148	15.8048	-3.43642	0.00209828	0.0201193
seq.6621.10	RLN2	0.268596	11.0197	3.43409	0.00210156	0.0201218
seq.8233.2	ITIH5	0.319073	11.3949	3.4311	0.00211725	0.020243
seq.13104.32	EFNB1	-0.303455	10.7617	-3.42911	0.00213152	0.0203502
seq.2333.72	TGFB1	0.250835	11.1049	3.42152	0.00216834	0.0204717
seq.12372.50	TPM3	-0.21095	8.91903	-3.42261	0.00216542	0.0204717
seq.13960.15	AGAP3	-0.287518	10.4125	-3.42554	0.00215111	0.0204717
seq.6382.17	MANBA	-0.414122	12.6387	-3.42143	0.00216882	0.0204717
seq.11140.56	COL1A1	-0.537511	12.9179	-3.42531	0.00214894	0.0204717
seq.3466.8	PRKACA	-0.735981	15.7257	-3.42499	0.00215875	0.0204717
seq.9826.135	FHIT	-0.767833	11.4598	-3.42419	0.002163	0.0204717
seq.18271.43	OXSM	-0.840874	11.3592	-3.42327	0.00216794	0.0204717
seq.22585.5	FZD4	-0.311962	12.47	-3.41931	0.00218028	0.0205508
seq.17826.341	EEF1D	-0.568789	16.3333	-3.4189	0.00218825	0.0205968
seq.11258.41	MADCAM1	-0.481246	11.6301	-3.41756	0.00219892	0.020668
seq.8067.21	KCNE3	0.182668	8.56215	3.41326	0.00221331	0.0207739
seq.7886.26	SPTLC1	-0.707186	12.3544	-3.41339	0.00222183	0.0208246
seq.8046.9	LGALS1	-0.464819	11.2367	-3.41263	0.00222603	0.0208316
seq.5481.16	RASA1	-0.785094	10.1788	-3.41212	0.00222883	0.0208316
seq.4551.72	ADGRG5	0.334836	9.722	3.40879	0.0022473	0.020953
seq.13628.58	GRB14	0.131679	9.81285	3.40698	0.0022481	0.020953
seq.23246.67	BLOC1S1	-0.66908	11.0635	-3.40801	0.00225169	0.0209571
seq.22557.68	MRPL50	0.184981	9.92787	3.40466	0.00226111	0.0210154
seq.9509.4	TMEM38B	-0.593837	11.2299	-3.4041	0.00227362	0.0210436
seq.12564.9	NIP7	-0.91117	11.6553	-3.40514	0.00226774	0.0210436
seq.17675.17	ACOT13	-1.16959	14.8842	-3.40464	0.00227058	0.0210436
seq.8244.16	FUT8	0.727181	11.3737	3.39988	0.00229755	0.0211003
seq.9969.8	SLC22A16	0.615754	12.9241	3.39967	0.00229874	0.0211003
seq.10506.53	PGRMC2	-0.517501	11.0218	-3.40072	0.00229277	0.0211003
seq.12549.33	HPGDS	-0.546057	12.1768	-3.40035	0.00229485	0.0211003
seq.11171.25	FLNA	-0.863985	11.7148	-3.4	0.00229686	0.0211003
seq.22010.36	PRKRA	-1.01029	11.2605	-3.40018	0.00229583	0.0211003
seq.16850.5	RGS5	0.266945	11.0221	3.39575	0.00231168	0.0211898
seq.9767.22	RIPPLY1	0.127345	9.24945	3.39454	0.00231865	0.0211955
seq.15610.72	LAP3	-0.8109	11.66	-3.3964	0.00231743	0.0211955
seq.9266.1	TREM1	0.335934	10.3637	3.39248	0.00234009	0.0213394
seq.24665.48	REM1	-0.23176	9.34449	-3.39197	0.0023408	0.0213394
seq.10382.1	ANGPTL3	0.400722	15.7613	3.39008	0.00234444	0.0213434
seq.2970.60	AREG	-0.676392	11.6271	-3.39087	0.0023494	0.0213594
seq.5001.6	SCGB2A1	0.274316	12.5122	3.38705	0.00236217	0.0214462
seq.10970.3	ART3	-0.424134	10.3697	-3.388	0.00236621	0.0214537
seq.13113.7	SPP1	-0.416366	11.006	-3.38681	0.00237321	0.0214879
seq.18416.3	ARL9	0.173464	8.94145	3.38341	0.00238357	0.0215524
seq.21181.10	LRP2BP	0.250773	10.6389	3.38146	0.00239515	0.0216277
seq.15466.30	COL9A1	-0.733517	13.2924	-3.38243	0.00239906	0.0216337
seq.22510.6	NFE2L2	0.379168	9.14594	3.38029	0.00241179	0.0216898
seq.17693.2	SEPTIN6	-0.265358	10.7422	-3.37877	0.00241124	0.0216898
seq.2989.17	IFNG	-0.596632	11.0345	-3.37734	0.00242951	0.0218198
seq.24316.10	BMT2	-0.299757	9.75274	-3.37679	0.00243284	0.0218202
seq.23649.6	KLHL2	-0.432891	10.2047	-3.3755	0.00244062	0.0218388
seq.14007.22	PAPSS1	-0.676766	11.7396	-3.37536	0.00244146	0.0218388
seq.5475.10	PRKCB	-0.875969	16.3487	-3.37402	0.00244956	0.0218818
seq.12532.28	CDC34	-0.393568	10.9519	-3.37181	0.00246298	0.0219723
seq.23561.4	CCDC97	-0.317065	10.6268	-3.36826	0.00248258	0.022088
seq.17744.31	RAB11A	-0.722447	15.7329	-3.36875	0.00248172	0.022088
seq.12329.21	RPS6KA1	-0.236058	8.6621	-3.36724	0.00249075	0.0221311
seq.5009.11	MSN	0.956761	12.3876	3.36463	0.0025071	0.0222468
seq.7187.3	PPM1L	-0.470838	9.79223	-3.36351	0.00251406	0.0222788
seq.8660.5	OLFML3	0.365907	13.4716	3.35808	0.00253799	0.0224195
seq.20453.9	NSMCE1	0.180392	9.14829	3.35799	0.00253854	0.0224195
seq.13436.54	MAZ	0.134424	9.12675	3.35775	0.00254002	0.0224195
seq.6413.79	LIPK	0.195247	8.9022	3.35688	0.00254552	0.0224383
seq.16851.50	SCO2	-0.75795	9.57308	-3.35578	0.00256259	0.0225589
seq.4148.49	PAPPA	0.675974	13.101	3.35407	0.00257344	0.0226245
seq.13374.4	DEFB113	0.524406	13.7347	3.34624	0.00261624	0.0226932
seq.22483.109	KRT71	0.521433	10.4848	3.34863	0.00260829	0.0226932
seq.24958.3	RFX5	0.425998	10.6917	3.35129	0.00259116	0.0226932
seq.3061.61	CTSB	0.334547	10.317	3.34491	0.00263233	0.0226932
seq.2785.15	CCL8	0.191443	8.06928	3.34444	0.00262619	0.0226932
seq.9800.20	NDUFB8	0.16327	9.53641	3.34514	0.00262053	0.0226932
seq.3222.11	SEMA3A	-0.205366	10.1082	-3.3485	0.00259886	0.0226932
seq.8985.13	SERAC1	-0.243113	11.3911	-3.34424	0.0026264	0.0226932
seq.3132.1	VEGFC	-0.28128	10.506	-3.34684	0.00261404	0.0226932
seq.9769.48	DNER	-0.381502	10.6164	-3.35033	0.00259732	0.0226932
seq.9764.79	HNRNPF	-0.44357	15.8671	-3.34438	0.0026255	0.0226932
seq.12578.13	ARF3	-0.49838	11.8163	-3.35038	0.002597	0.0226932
seq.4188.1	AKR7A2	-0.750091	15.6703	-3.34642	0.00262252	0.0226932
seq.18233.10	GOT2	-0.762866	14.363	-3.35135	0.00259079	0.0226932
seq.9388.18	MCEE	-0.827636	12.3563	-3.34503	0.00263156	0.0226932
seq.7009.6	CD72	0.164902	9.85015	3.3426	0.00263705	0.0227045
seq.3174.2	ADAMTS1	0.179158	9.15728	3.34011	0.00265332	0.0227564
seq.11126.102	TRIO	-0.310861	9.43909	-3.34174	0.00265302	0.0227564
seq.3903.49	SNX4	-1.07758	13.9313	-3.3423	0.00264933	0.0227564
seq.5644.60	RNASE4	0.331308	13.2012	3.33803	0.00266704	0.0228446
seq.13503.19	ARL6IP5	0.900737	12.7554	3.33893	0.00267148	0.0228534
seq.9925.56	SCARF2	0.19936	9.64113	3.33428	0.00269186	0.0229982
seq.7928.183	TPST1	0.476232	12.2476	3.33344	0.00270591	0.023059
seq.14237.1	HSPA1A	-0.221271	11.1604	-3.33228	0.00270515	0.023059
seq.2579.17	MMP9	0.927875	15.1427	3.33312	0.00271007	0.023065
seq.13439.6	IQCF3	-0.309863	11.4318	-3.33047	0.00271729	0.0230782
seq.19134.66	POLR2K	-0.797108	13.1634	-3.33186	0.00271855	0.0230782
seq.9061.3	ARHGEF10	-0.257359	10.0604	-3.33025	0.00272339	0.0230899
seq.8927.6	None	0.271406	10.3983	3.32696	0.00274098	0.023102
seq.7070.25	KEL	0.197045	9.02882	3.32627	0.00274562	0.023102
seq.9097.5	ELAPOR1	-0.136229	9.2622	-3.3267	0.0027427	0.023102
seq.13529.39	NAP1L2	-0.169613	10.4383	-3.32883	0.00272835	0.023102
seq.12530.14	CKS1B	-0.310004	12.4949	-3.32721	0.00273925	0.023102
seq.4396.54	IFNL1	-0.430905	8.27276	-3.32968	0.00273319	0.023102
seq.15413.3	LCAT	0.325099	9.47694	3.32704	0.00275101	0.0231182
seq.6264.9	CCN1	0.371767	8.48114	3.32541	0.00276212	0.0231823
seq.15319.226	CCNA1	0.140946	9.84907	3.32241	0.0027719	0.0231894
seq.19161.1	USP15	-0.612835	15.2314	-3.32357	0.0027734	0.0231894
seq.4249.64	NME2	-0.670307	15.7927	-3.32474	0.00276667	0.0231894
seq.7917.17	CPD	0.213088	11.1358	3.32103	0.00278142	0.0232273
seq.11327.56	CLK2	0.34951	10.3093	3.31995	0.00279952	0.0232668
seq.16621.77	NAXE	-0.337655	12.7938	-3.31844	0.00279925	0.0232668
seq.4498.62	NCAM1	-0.385555	13.4915	-3.31831	0.00280011	0.0232668
seq.17814.8	BPNT1	-0.793366	14.7101	-3.32094	0.00279273	0.0232668
seq.12652.37	AHCYL1	-0.763583	12.227	-3.3184	0.0028103	0.0233223
seq.15403.53	ID2	0.541259	10.2935	3.31458	0.00283686	0.0234762
seq.24941.14	CLUH	0.476635	9.96871	3.31421	0.00283941	0.0234762
seq.7137.8	MSRA	0.18758	9.06791	3.31331	0.00283489	0.0234762
seq.3363.31	CSK	-0.613471	17.3591	-3.31035	0.00286658	0.0236527
seq.18183.3	LDLRAP1	-1.04168	15.6761	-3.31017	0.00286786	0.0236527
seq.4428.1	CHST2	0.135467	10.0085	3.30573	0.00288835	0.0237923
seq.4911.49	GSTP1	-0.376624	12.2658	-3.30516	0.00289242	0.0237964
seq.16607.78	GSN	-0.290711	16.5722	-3.30368	0.00290302	0.0238542
seq.17355.56	SYT4	0.756755	10.9239	3.30398	0.00291191	0.0238977
seq.18864.7	PRSS3	0.441177	9.15124	3.30174	0.00292801	0.0240003
seq.11458.30	PCBP1	-0.621867	16.2446	-3.30066	0.00293579	0.0240345
seq.15567.2	CD247	0.15729	9.24504	3.29662	0.00295397	0.0240651
seq.20950.159	PRTFDC1	-0.927721	15.0958	-3.29937	0.00294514	0.0240651
seq.17333.20	ACADM	-1.15477	10.9144	-3.29841	0.00295206	0.0240651
seq.9257.14	TACO1	-1.1579	11.9707	-3.29841	0.00295207	0.0240651
seq.25889.108	AIM2	-0.212847	11.8684	-3.29518	0.00296444	0.0241209
seq.12634.79	BCAR3	-0.439141	11.3496	-3.2948	0.0029784	0.0242003
seq.25033.194	VCP	-0.863981	15.499	-3.29438	0.00298146	0.0242003
seq.25093.96	VANGL1	0.24526	9.46465	3.29213	0.00299172	0.0242246
seq.8363.18	ELAPOR2	0.192041	9.40953	3.29165	0.00299111	0.0242246
seq.7239.9	GSTM1	0.254468	8.45752	3.28995	0.00301415	0.0243176
seq.14012.17	DHX58	-0.139071	10.6076	-3.28918	0.00300857	0.0243176
seq.15312.14	AGO1	-0.585777	12.2096	-3.29004	0.00301346	0.0243176
seq.2998.53	JAM3	-0.589356	12.0285	-3.28884	0.00302239	0.0243546
seq.7748.11	NDUFV2	-0.350248	11.9064	-3.2808	0.00307127	0.0247185
seq.15606.19	KRT19	0.218737	10.7191	3.27995	0.00307776	0.0247408
seq.21926.24	UBE2D1|UBB	-0.694237	15.7031	-3.27846	0.00310046	0.0248934
seq.19506.6	GLYAT	0.325439	11.0078	3.27605	0.00311218	0.0249574
seq.4991.12	GPC5	-0.248629	9.67637	-3.27529	0.00312476	0.024981
seq.15591.28	GPX1	-0.707161	12.5224	-3.27508	0.00312638	0.024981
seq.3420.21	CA13	-0.980638	14.4649	-3.27547	0.00312338	0.024981
seq.21770.18	B3GAT1	-0.483487	9.34434	-3.27141	0.00315467	0.0251769
seq.8759.29	A4GALT	-0.233425	10.0598	-3.26598	0.00318613	0.025369
seq.19173.5	ZFAND1	-0.660042	15.6749	-3.26734	0.00318635	0.025369
seq.23252.4	DNAJB3	0.320807	10.3788	3.26322	0.00321869	0.0255959
seq.17691.1	TPP1	0.194467	10.7827	3.25874	0.00324246	0.0257402
seq.5464.52	GRB2	-0.634096	15.8928	-3.25996	0.00324456	0.0257402
seq.2773.50	IL10	0.216547	7.94939	3.25755	0.0032577	0.0258137
seq.23264.42	MED10	-0.683142	12.1983	-3.25537	0.00328128	0.0259537
seq.18180.58	RTN4IP1	-0.86017	10.9398	-3.25514	0.00328316	0.0259537
seq.8389.8	LRRC74A	0.365304	11.9583	3.25225	0.00329539	0.025958
seq.18310.26	SELENOW	-0.6399	12.2347	-3.25405	0.00329196	0.025958
seq.16809.1	NME4	-1.16523	13.3556	-3.25414	0.00329119	0.025958
seq.9994.217	ATP4B	1.01381	12.148	3.25233	0.00330582	0.0260094
seq.24427.33	INPP4B	-0.584426	11.3063	-3.25151	0.00331249	0.0260311
seq.11318.20	APOA5	-0.361177	10.9137	-3.24901	0.00333283	0.0261602
seq.2754.50	C3	0.422919	15.711	3.24554	0.00334928	0.0262081
seq.13541.1	MYCT1	0.296087	10.5566	3.2464	0.00335169	0.0262081
seq.7117.21	SERPINI2	0.168433	9.33475	3.24488	0.00335466	0.0262081
seq.19286.30	MYL5	0.154522	9.99895	3.24512	0.00335271	0.0262081
seq.2201.17	COL18A1	0.36274	14.3823	3.24297	0.00337043	0.0262185
seq.17356.34	IL1F10	0.246829	9.01778	3.24453	0.00336963	0.0262185
seq.3299.29	CNTN5	-0.251313	9.38789	-3.24362	0.00337718	0.0262185
seq.3198.4	IDS	-0.520203	12.1072	-3.24566	0.0033603	0.0262185
seq.3280.49	ACAN	-0.661572	12.0608	-3.24356	0.00337768	0.0262185
seq.2771.35	IGFBP1	-0.785119	14.6005	-3.24333	0.00337961	0.0262185
seq.4184.43	EIF4EBP2	0.364003	8.25829	3.24101	0.00339885	0.026287
seq.21819.9	NELFE	0.225474	10.5857	3.23843	0.00340815	0.026287
seq.19263.147	EIF4E	-0.606456	16.5845	-3.24045	0.00340346	0.026287
seq.20386.15	PTRHD1	-0.724387	11.6473	-3.24171	0.00339301	0.026287
seq.3887.90	KPNB1	-0.863807	15.4386	-3.24033	0.00340453	0.026287
seq.21340.38	HLF	0.202125	8.9648	3.23693	0.00342375	0.026349
seq.13013.41	PRKN	-0.26966	11.5626	-3.23653	0.0034241	0.026349
seq.12551.3	ITCH	1.53974	11.3796	3.23685	0.00343364	0.0263615
seq.6622.90	APLN	-0.228165	10.1307	-3.23568	0.00343203	0.0263615
seq.4568.17	SLITRK5	-0.453852	11.6896	-3.23555	0.00344456	0.0263941
seq.8773.172	EMILIN3	-0.609864	10.2066	-3.23498	0.00344936	0.0263941
seq.9531.24	LST1	-0.645134	12.1106	-3.23493	0.00344977	0.0263941
seq.23288.28	LRRC20	-0.215573	8.58743	-3.23369	0.00345802	0.0263966
seq.17768.50	HAO1	-0.219322	9.57766	-3.23337	0.00345586	0.0263966
seq.20531.5	SLAMF9	0.140114	8.8609	3.23119	0.00346923	0.0264217
seq.3392.68	AKT3	-0.70801	16.4276	-3.23292	0.00346684	0.0264217
seq.20946.41	GTSF1	0.104773	9.27714	3.22555	0.00351746	0.0266239
seq.5858.6	YWHAZ	-0.483035	17.2566	-3.22721	0.00350636	0.0266239
seq.18174.79	PDCD6IP	-0.506132	12.388	-3.22734	0.00350807	0.0266239
seq.19275.68	IDH3G	-0.748185	12.8806	-3.22695	0.00351784	0.0266239
seq.13969.24	KPNA6	-0.769837	13.047	-3.22673	0.00351975	0.0266239
seq.4217.49	HSD17B10	-1.13167	13.4633	-3.22724	0.00351532	0.0266239
seq.5594.87	MESD	-0.343295	10.4682	-3.22594	0.00352657	0.0266452
seq.4886.3	CCL7	0.307788	9.47146	3.22536	0.00353159	0.0266529
seq.13429.3	WFDC10A	0.162765	9.98242	3.22124	0.0035548	0.0267978
seq.22816.4	TRIM54	-0.248633	10.457	-3.22002	0.00356629	0.026854
seq.7257.18	PTH2	0.213111	9.01195	3.22021	0.0035731	0.0268748
seq.3447.64	CXCL8	1.67275	11.8286	3.2157	0.00361594	0.0271053
seq.3853.56	MDH1	-0.476955	14.9951	-3.21461	0.00361297	0.0271053
seq.17787.1	ECHS1	-1.12699	13.809	-3.2163	0.00361069	0.0271053
seq.10781.19	CLEC4G	0.261647	12.4873	3.21194	0.00363659	0.0272246
seq.9606.4	NUP210L	0.173989	9.91878	3.21141	0.0036413	0.0272246
seq.12691.44	SHMT2	-0.935797	15.3594	-3.21253	0.00364411	0.0272246
seq.9749.190	LCP1	0.354851	13.6945	3.2099	0.00365484	0.0272742
seq.9241.40	SIRPG	0.191142	9.37816	3.20943	0.00366032	0.0272845
seq.15448.47	SQSTM1	0.76844	10.1882	3.20799	0.00368471	0.027405
seq.11207.3	MSR1	-0.127689	9.6173	-3.20688	0.00368192	0.027405
seq.8913.22	SIGLEC11	0.413186	11.4328	3.20729	0.00369103	0.0274214
seq.3302.58	CST7	0.315548	9.54154	3.2015	0.00374355	0.0276353
seq.10042.8	SGK3	-0.288692	10.8874	-3.20149	0.00373618	0.0276353
seq.7866.11	DNAJC30	-0.313273	11.7634	-3.20155	0.00373015	0.0276353
seq.13967.14	TXNRD1	-0.385673	12.7279	-3.20003	0.00374409	0.0276353
seq.6605.17	IGFALS	-0.422726	14.935	-3.19996	0.00374469	0.0276353
seq.5360.9	AKT2	-0.99924	14.1472	-3.20342	0.00372605	0.0276353
seq.21752.10	RHOT1	-1.27936	12.713	-3.20077	0.00375024	0.0276455
seq.13526.5	SSB	0.160827	9.39928	3.19689	0.00377286	0.0277816
seq.10534.40	PARP1	0.252309	9.32141	3.19668	0.0037879	0.0278147
seq.5017.19	PRDX5	-0.163965	8.88318	-3.1946	0.00379405	0.0278147
seq.9930.48	GABBR2	-0.300941	9.50093	-3.19621	0.00379225	0.0278147
seq.19222.124	RAB5B	-0.777924	15.9792	-3.1969	0.00378584	0.0278147
seq.2950.57	IGFBP4	0.28347	11.7899	3.1935	0.00380426	0.0278511
seq.19303.64	PET117	0.191401	9.53734	3.19317	0.00380737	0.0278511
seq.7140.1	CELA2A	0.32301	10.7574	3.19089	0.0038417	0.0280298
seq.7189.55	CHST3	0.21561	9.18304	3.19018	0.0038462	0.0280298
seq.12729.12	PSMG3	-0.540592	11.1695	-3.19032	0.00384705	0.0280298
seq.13572.43	PSMD11	-0.939475	13.9607	-3.19016	0.00384863	0.0280298
seq.20390.4	HMGN3	0.318744	8.45928	3.18892	0.00386026	0.0280473
seq.18942.11	PSMB9	-0.471906	10.9792	-3.18903	0.00385921	0.0280473
seq.4775.34	GSN	-0.661081	10.5706	-3.18777	0.00387104	0.0280473
seq.3839.60	AIP	-0.880985	12.9431	-3.18766	0.00387208	0.0280473
seq.19229.92	HOMER1	-0.892526	11.9543	-3.18819	0.00386711	0.0280473
seq.19511.8	DCUN1D2	0.142209	8.21108	3.18575	0.00387693	0.028052
seq.5343.74	CPE	0.278998	10.7179	3.18412	0.00389791	0.0281572
seq.22492.108	LMO3	0.194247	10.516	3.18333	0.00389993	0.0281572
seq.19558.10	LRP4	-0.364176	12.0552	-3.1804	0.00392815	0.0283303
seq.22468.54	H2AC11	0.991005	13.8121	3.18096	0.00393587	0.0283553
seq.13377.3	CYB561D1	0.242002	11.4291	3.1769	0.00396157	0.0285096
seq.24286.48	MEIG1	0.546471	10.3752	3.1759	0.00398467	0.0286449
seq.16302.11	BPIFA2	-0.270243	10.1711	-3.17349	0.00400628	0.0287383
seq.12740.55	FEV	-0.665186	10.6985	-3.17409	0.0040023	0.0287383
seq.12682.5	KYAT3	-0.666956	10.4652	-3.1729	0.00401395	0.0287623
seq.8901.40	YWHAG	-0.558071	16.1566	-3.17202	0.00402068	0.0287796
seq.14144.3	H2AW	0.671051	11.2845	3.17127	0.00402982	0.028814
seq.8832.55	BST2	0.106434	9.26959	3.16829	0.0040456	0.0288959
seq.21685.29	DCC	-0.54103	13.7779	-3.16543	0.00407987	0.0291095
seq.8070.88	DLG4	-0.705287	10.0616	-3.1646	0.00409586	0.02913
seq.13573.5	ARPC3	-0.776333	14.2746	-3.16503	0.00409149	0.02913
seq.10668.5	STX4	-0.964965	14.2647	-3.16499	0.00409191	0.02913
seq.21579.35	MYBPC3	0.242507	8.35645	3.16331	0.00410867	0.02919
seq.24892.8	SHCBP1L	0.186529	9.17401	3.15966	0.00413244	0.0293276
seq.7082.2	B3GNT6	0.164087	10.329	3.15833	0.00414489	0.0293534
seq.17205.21	RAB5A	-0.837026	14.7678	-3.15971	0.00414483	0.0293534
seq.21438.45	TRIM5	-0.708118	12.1986	-3.15435	0.00419919	0.0297064
seq.2877.3	UBE2I	-0.416362	15.4375	-3.1506	0.00422367	0.0298478
seq.5852.6	S100A12	0.241952	10.8066	3.14866	0.00424362	0.0299571
seq.10513.13	KCNIP3	-0.453291	10.566	-3.1489	0.00425514	0.0300066
seq.6456.17	PSG6	-0.230492	10.0777	-3.14624	0.00427454	0.0301116
seq.21323.2	RWDD1	-0.881923	14.9098	-3.14616	0.00428354	0.0301431
seq.8257.71	OXT	0.270063	9.92583	3.14446	0.00430127	0.0301471
seq.4866.59	NTRK2	-0.440394	13.6169	-3.14372	0.00429494	0.0301471
seq.3855.56	PRDX1	-0.627015	15.1032	-3.14455	0.00430031	0.0301471
seq.4460.8	PDPK1	-0.991741	11.5571	-3.14437	0.0043022	0.0301471
seq.24661.4	MAP6D1	-0.329539	10.1149	-3.14321	0.00431436	0.0302005
seq.5116.62	ROBO2	-0.265911	11.2736	-3.14061	0.0043275	0.0302607
seq.15368.3	BMPER	0.231754	11.002	3.13653	0.00437067	0.0305305
seq.10722.13	SYK	-0.910086	13.0703	-3.1374	0.00437562	0.0305331
seq.5738.25	TNC	0.36887	13.5519	3.13445	0.00439277	0.0306207
seq.20107.11	MYL4	-0.277558	13.7788	-3.13082	0.0044317	0.0308598
seq.9886.28	XRCC4	0.391876	10.0276	3.12927	0.00446285	0.0310027
seq.3461.58	BCAN	-0.509925	10.8114	-3.1288	0.00446793	0.0310027
seq.15653.9	COL10A1	-0.58852	13.7662	-3.12846	0.00446349	0.0310027
seq.9815.5	ARHGAP1	-0.726843	10.7796	-3.12853	0.00447082	0.0310027
seq.21763.46	USP4	-1.17384	12.9407	-3.12716	0.00448573	0.0310737
seq.21322.60	GTF2E2	0.599821	9.72616	3.12352	0.00452545	0.0310909
seq.2573.20	IL6	0.212062	8.59666	3.12246	0.0045302	0.0310909
seq.21736.60	HS2ST1	-0.301777	11.5923	-3.12391	0.00450666	0.0310909
seq.21734.36	C1GALT1|C1GALT1C1	-0.322437	12.6567	-3.12454	0.00449973	0.0310909
seq.21544.4	ATL3	-0.455692	10.5505	-3.1237	0.00452344	0.0310909
seq.19188.21	NAP1L4	-0.575163	14.6865	-3.12259	0.0045275	0.0310909
seq.9929.16	HSD17B7	-0.769015	12.4631	-3.1239	0.00452133	0.0310909
seq.12649.80	MDH2	-0.800524	16.8414	-3.12388	0.00452147	0.0310909
seq.24459.15	COPB2	-0.849108	15.8769	-3.12323	0.00452862	0.0310909
seq.4961.17	ANXA2	-0.304789	10.1098	-3.12181	0.00454428	0.0311554
seq.11442.1	DNER	0.340066	10.848	3.12062	0.0045554	0.0311995
seq.7792.58	CCDC90B	0.137579	9.44661	3.11816	0.00457	0.0312675
seq.22504.3	N4BP2L2	-0.471295	9.39718	-3.11839	0.00458207	0.0312858
seq.11307.33	WWP1	-0.824025	13.9695	-3.11845	0.00458144	0.0312858
seq.9172.69	MMP8	0.714573	15.6584	3.11658	0.00460225	0.0313914
seq.20514.8	BAMBI	0.515253	10.1684	3.11405	0.0046305	0.0315518
seq.5716.49	CSAG1	-0.153346	8.45243	-3.11126	0.00464708	0.0316324
seq.13985.12	SMURF2	-0.175388	9.98422	-3.11051	0.00465548	0.0316573
seq.23361.20	RBM4	-0.682943	12.0302	-3.10815	0.00469712	0.0319079
seq.4976.57	CRK	-0.570167	13.3803	-3.10705	0.00470962	0.0319602
seq.4143.74	XCL1	0.194836	9.66691	3.10441	0.00472722	0.0320252
seq.2942.50	CYCS	-0.355403	10.9979	-3.10537	0.00472881	0.0320252
seq.9604.14	CDH11	-0.451707	12.9726	-3.10307	0.00474121	0.0320766
seq.12591.27	OPHN1	-1.01836	13.4246	-3.1034	0.00475142	0.0321131
seq.2870.29	RAC1	-0.659652	15.3124	-3.10282	0.00475803	0.0321252
seq.17804.102	PNPO	-0.327011	10.8306	-3.10178	0.00476999	0.0321733
seq.22393.130	CCDC59	0.166704	8.45408	3.09922	0.00478456	0.0321739
seq.11134.30	MTRF1L	-0.181194	10.3229	-3.09944	0.00478201	0.0321739
seq.19136.22	ALDH6A1	-1.05224	12.9103	-3.10101	0.00477889	0.0321739
seq.6571.75	C17orf78	-0.191561	10.5455	-3.09784	0.00480062	0.0322493
seq.25216.8	S100A8	-0.801176	12.0965	-3.09854	0.00480757	0.0322635
seq.3209.69	MEPE	0.190633	7.80941	3.09622	0.00482117	0.0323222
seq.11672.17	KIF16B	0.32959	12.3898	3.0924	0.00486425	0.0324834
seq.7016.12	GCNT1	0.163757	9.90893	3.09194	0.00486959	0.0324834
seq.4962.52	CDNF	-0.233429	10.6523	-3.09232	0.00486509	0.0324834
seq.11634.32	RGS10	-0.656388	16.0251	-3.09325	0.00486943	0.0324834
seq.4903.72	PPP3CA|PPP3R1	-0.919855	15.2445	-3.09383	0.00486261	0.0324834
seq.23705.42	CTPS1	-0.809538	15.0183	-3.09045	0.00490254	0.0326705
seq.22092.43	CASP4	0.282499	10.5568	3.08941	0.00491198	0.0327008
seq.3059.50	TNFSF13B	0.168102	10.4413	3.08581	0.00494239	0.0328376
seq.24638.3	FAM89B	-0.319176	12.0674	-3.08622	0.00493747	0.0328376
seq.12437.18	ULK3	-0.195962	9.92167	-3.08459	0.00495797	0.0329082
seq.5593.11	PDIA5	0.624669	14.6364	3.08507	0.0049666	0.0329327
seq.5879.51	DCTN2	0.227628	9.70548	3.08337	0.00498453	0.0330188
seq.7242.14	VSTM4	0.371121	10.8359	3.08149	0.00500969	0.0330319
seq.22541.46	GINS1	0.221171	9.24637	3.0806	0.00502012	0.0330319
seq.2558.51	POMC	0.130508	9.08983	3.07926	0.00502121	0.0330319
seq.10025.1	DLD	-0.27715	11.2222	-3.08036	0.00500784	0.0330319
seq.24497.8	TRIML1	-0.292716	11.1559	-3.08118	0.00499969	0.0330319
seq.21129.95	MAD2L1BP	-0.334707	12.198	-3.08081	0.00500243	0.0330319
seq.13518.5	ASAP2	-0.738149	11.7294	-3.08116	0.00501373	0.0330319
seq.5102.55	MICB	0.328039	9.94101	3.07788	0.00505357	0.033212
seq.17405.2	UCHL5	-0.578779	11.3182	-3.07492	0.00508975	0.0334169
seq.14759.149	CDH1	0.194213	10.8357	3.07236	0.00510561	0.033488
seq.23173.3	TIMP1	0.592133	13.18	3.07289	0.00511477	0.0335151
seq.17818.22	SUGT1	-0.60476	16.2919	-3.07195	0.00512641	0.0335583
seq.2891.1	CD22	0.22036	10.9509	3.06957	0.00514016	0.0336154
seq.24252.85	C12orf65	0.214909	9.72125	3.06912	0.00515232	0.0336414
seq.3891.56	MBD4	0.110601	9.18511	3.06843	0.00515424	0.0336414
seq.22466.27	HES5	-0.22244	12.493	-3.06653	0.00517794	0.033763
seq.20516.11	SCN3B	-0.287272	9.41833	-3.06301	0.00523802	0.0341214
seq.8368.102	TNFRSF1B	0.352987	12.9565	3.05986	0.00526197	0.0342439
seq.13963.7	TOLLIP	-0.804878	15.4065	-3.05969	0.00528006	0.0343281
seq.8760.10	DCUN1D5	0.291197	11.1548	3.05622	0.00531006	0.0344795
seq.8900.28	NEO1	-0.240751	12.3236	-3.0558	0.00531369	0.0344795
seq.17773.26	NAPG	-0.911091	12.7103	-3.05402	0.00535263	0.0346984
seq.3181.50	CTSS	0.355317	14.4141	3.05208	0.0053616	0.0347228
seq.3836.51	UFM1	-0.662814	13.9373	-3.05226	0.00537543	0.0347785
seq.3470.1	SELE	0.436481	14.9923	3.04795	0.00541512	0.0349674
seq.22070.5	ARHGEF16	-0.331828	11.8819	-3.04834	0.00541005	0.0349674
seq.19327.31	HAT1	0.31305	11.8249	3.04685	0.00542955	0.0349928
seq.7875.86	PLEK	-0.458029	17.1628	-3.04725	0.00542702	0.0349928
seq.8556.5	RETREG1	-0.167255	9.75142	-3.04435	0.0054623	0.0351698
seq.2605.49	TNFRSF8	0.297961	11.4392	3.04388	0.00546904	0.0351793
seq.8074.32	TMEM70	0.620966	8.77379	3.0433	0.00549247	0.0352959
seq.18413.24	ARL4D	0.238141	8.97002	3.04204	0.00550922	0.0353694
seq.10754.113	PROK2	0.491033	11.8989	3.04126	0.00551958	0.0354018
seq.14283.12	RAB14	-0.504689	13.1656	-3.03853	0.00555119	0.0355703
seq.6039.24	CRHBP	0.384695	11.2241	3.03445	0.00561056	0.0358817
seq.12811.55	ZNF415	-0.131552	9.90878	-3.03354	0.00560627	0.0358817
seq.14095.1	KLRK1	-0.118934	8.97881	-3.03181	0.00562964	0.0359445
seq.16296.43	LGR5	-0.204049	10.6125	-3.0313	0.00563655	0.0359445
seq.21933.7	UBA7	-0.678543	16.6271	-3.03288	0.00563183	0.0359445
seq.23695.1	FSD1	-0.165507	9.19564	-3.0284	0.00567595	0.0360741
seq.21178.8	CIAO1	-0.66384	13.5498	-3.02991	0.00567213	0.0360741
seq.2823.7	COMMD7	-0.691569	12.4425	-3.02944	0.00567853	0.0360741
seq.10372.18	STAT6	-0.765028	14.051	-3.03011	0.00566933	0.0360741
seq.10574.10	B2M	1.14432	12.3263	3.02689	0.00571335	0.0362607
seq.25459.3	MACROD2	-0.504085	11.293	-3.02613	0.00572387	0.0362929
seq.14271.23	RAB6B	-0.884575	15.1691	-3.02556	0.0057316	0.0363074
seq.3868.8	SGTA	-0.701352	13.5624	-3.02486	0.00574133	0.0363345
seq.7660.21	TPM4	-0.907788	15.96	-3.02249	0.00577399	0.0365065
seq.4304.18	LCORL	0.168184	8.27118	3.0206	0.00578442	0.0365378
seq.10023.32	VDR	-0.289798	10.0648	-3.02114	0.0057928	0.0365561
seq.23560.154	CEP41	-1.02414	11.8163	-3.01835	0.00583167	0.0367665
seq.25042.3	ME2	-0.791121	16.6038	-3.0174	0.00584491	0.0368152
seq.22134.1	ETV4	-0.372245	9.93356	-3.01557	0.00587069	0.0369427
seq.14318.1	VPS29	0.52239	12.0633	3.01428	0.00588884	0.0369954
seq.21491.7	AOC3	-0.490463	15.3553	-3.01348	0.00589017	0.0369954
seq.25100.11	CMIP	-1.05801	13.0462	-3.01148	0.0059285	0.0372011
seq.13976.9	ARHGEF1	-0.570756	12.1865	-3.00967	0.00595428	0.0373277
seq.13994.1	FBL	0.310027	12.1854	3.00565	0.00599469	0.0375249
seq.22041.26	MAP2K5	-0.576372	15.8435	-3.00669	0.005997	0.0375249
seq.21552.9	ACOX1	-0.979253	15.3004	-3.00451	0.00602838	0.0376858
seq.15573.110	NCAN	-0.608341	12.9625	-3.00304	0.00604959	0.037783
seq.11159.14	MUL1	0.132826	8.17574	3.00032	0.00607164	0.0378852
seq.13392.13	ATP1B1	-0.387165	9.72452	-3.0007	0.00608358	0.0379242
seq.9594.30	SLC30A5	-0.646448	10.8084	-2.99736	0.00613249	0.0381934
seq.21802.53	NEIL1	0.286003	14.3581	2.99341	0.00617309	0.0384103
seq.3000.66	MBL2	0.863871	9.65465	2.9934	0.00619082	0.0384489
seq.15303.63	S100A5	-0.667495	12.1816	-2.99351	0.00618918	0.0384489
seq.22057.9	ALDH1B1	0.249053	9.69579	2.99274	0.00620055	0.0384688
seq.13476.16	KIN	0.211733	8.7451	2.99124	0.00622289	0.0384688
seq.18274.2	SERF2	-0.19375	10.7886	-2.99071	0.00621313	0.0384688
seq.21191.24	DUSP21	-0.271354	9.27229	-2.99237	0.00620613	0.0384688
seq.15604.18	MAPK9	-0.729016	14.0754	-2.99126	0.00622262	0.0384688
seq.22113.2	COQ6	0.304587	10.28	2.98778	0.00627457	0.0387523
seq.15622.13	OPCML	-0.371154	11.2726	-2.98577	0.00630483	0.0388312
seq.23591.9	EXD1	-0.418451	12.567	-2.98547	0.00629842	0.0388312
seq.6706.18	ALPG	-0.422508	8.48232	-2.98609	0.00630001	0.0388312
seq.22082.25	BEX2	-0.145321	9.97512	-2.98309	0.0063275	0.0388319
seq.23340.37	MRI1	-0.455194	10.7148	-2.98503	0.00631592	0.0388319
seq.8403.18	FASN	-0.790893	13.833	-2.98493	0.00631739	0.0388319
seq.19755.38	ATP5IF1	-1.21886	14.1304	-2.98421	0.00632825	0.0388319
seq.13937.75	CAND1	-0.529153	12.1251	-2.98327	0.00634249	0.0388835
seq.18166.4	RHOB	-0.379389	11.0142	-2.98278	0.00634998	0.0388936
seq.4267.81	PES1	0.156767	8.84767	2.97838	0.00639906	0.0391582
seq.20994.37	PLEKHF2	1.12461	12.7456	2.97782	0.00642569	0.0392011
seq.12417.46	TPRKB	0.13325	10.0551	2.97639	0.0064296	0.0392011
seq.14623.26	SUMO3	-0.559462	14.9367	-2.97829	0.00641845	0.0392011
seq.25115.21	FHOD1	-0.780432	16.2451	-2.97829	0.00641846	0.0392011
seq.16769.20	RAC3	-0.358909	10.7887	-2.97412	0.00648263	0.0394523
seq.14082.56	TLN2	-0.883774	12.8286	-2.97446	0.00647747	0.0394523
seq.11347.9	TALDO1	0.453642	14.4066	2.97177	0.00650297	0.0395039
seq.21240.6	AMT	-1.06774	12.551	-2.97296	0.00650059	0.0395039
seq.9100.32	C5orf46	-0.845838	12.6597	-2.97224	0.00651182	0.0395217
seq.9114.84	UMODL1	-0.171466	9.84207	-2.96778	0.00656327	0.0397977
seq.21435.143	SRPK2	-0.36366	11.0442	-2.96855	0.0065694	0.0397986
seq.7779.86	CHST11	0.402756	12.8362	2.96707	0.00657568	0.0398005
seq.13622.16	PPP2R5A	-0.716322	15.3125	-2.96639	0.00660328	0.0399313
seq.11334.7	LILRB3	-0.228548	10.2083	-2.96514	0.00661208	0.0399482
seq.22488.17	KLF9	-0.691671	12.6231	-2.96491	0.00662675	0.0400006
seq.5532.53	FGFR1	-0.240819	9.65964	-2.96337	0.00665111	0.0401113
seq.12936.38	RLBP1	-0.184465	10.2798	-2.96079	0.00667376	0.0401651
seq.4960.72	ANXA1	-0.590195	15.5675	-2.96233	0.00666751	0.0401651
seq.19262.219	ACADVL	-1.32104	14.0207	-2.96167	0.00667811	0.0401651
seq.5014.49	NCK1	-0.329866	10.3763	-2.95987	0.00670678	0.0403012
seq.19225.11	BLNK	0.155072	9.29586	2.95825	0.00671425	0.0403097
seq.21713.11	RELN	0.369493	12.9244	2.95778	0.00672177	0.0403185
seq.5307.12	F9	0.229025	13.2371	2.9563	0.0067456	0.0403525
seq.10663.42	INSIG1	0.15334	8.93139	2.95639	0.00674405	0.0403525
seq.5440.26	TNNI2	-0.494149	11.6536	-2.95806	0.00673572	0.0403525
seq.12365.108	RUVBL1	-0.199172	11.292	-2.9555	0.00675839	0.0403927
seq.23536.14	None	0.129834	8.27611	2.95169	0.00682015	0.0407015
seq.24431.32	CMTR1	0.129006	9.2385	2.95118	0.00682837	0.0407015
seq.13460.4	CHAD	-0.554101	14.8914	-2.95216	0.00682797	0.0407015
seq.2855.49	MAPK3	-0.696906	14.728	-2.95183	0.00683648	0.0407134
seq.9954.2	NPIPB3	0.322952	11.2916	2.94888	0.00688072	0.0407583
seq.21114.18	DNAJC12	0.280027	8.62801	2.94919	0.0068796	0.0407583
seq.17706.4	PPP1R1A	0.162197	10.0896	2.9491	0.00686241	0.0407583
seq.25493.11	FAM221B	-0.34128	9.49221	-2.94922	0.00687911	0.0407583
seq.13747.9	CA6	-0.66213	11.6396	-2.94945	0.00687529	0.0407583
seq.21760.22	UBA1	-0.929021	15.198	-2.95038	0.00686018	0.0407583
seq.9995.6	DUT	-0.742047	12.0916	-2.94829	0.00689434	0.0408028
seq.2682.68	HSPD1	-0.882666	15.3376	-2.94757	0.00690619	0.0408366
seq.8906.60	LRTM2	-0.194269	12.4371	-2.94587	0.00691539	0.0408548
seq.5103.30	CD200R1	-0.145304	10.1907	-2.94211	0.00697756	0.0411151
seq.7695.106	SQSTM1	-0.194424	12.4462	-2.94209	0.00697797	0.0411151
seq.21876.266	PICK1	-0.319685	10.9202	-2.94346	0.00697402	0.0411151
seq.10336.3	STUB1	-0.771155	11.2155	-2.94238	0.00699194	0.041161
seq.23567.37	GNAQ	-0.384494	11.6445	-2.94199	0.00699844	0.0411629
seq.17764.108	RHOC	-0.960481	14.2959	-2.94064	0.00702095	0.0412589
seq.13959.7	LAP3	-0.772983	15.5491	-2.93984	0.00703428	0.0413008
seq.18177.49	NAE1	-0.308958	11.0008	-2.93803	0.00706309	0.0414268
seq.12698.72	KPNA4	-0.702957	11.5667	-2.93782	0.00706816	0.0414268
seq.6434.18	AOC2	-0.415947	10.0685	-2.93503	0.00711525	0.0416296
seq.11105.171	ENO1	-0.544323	15.0667	-2.93487	0.00711527	0.0416296
seq.3040.59	CCL3	0.366858	9.95522	2.93357	0.00714004	0.0416648
seq.13228.75	MDM2	0.211429	9.5747	2.93378	0.00713277	0.0416648
seq.23677.30	NCKIPSD	-0.748217	15.9568	-2.93357	0.00713993	0.0416648
seq.8758.2	PCDHA7	0.372478	9.59253	2.93177	0.00717057	0.0417856
seq.12641.3	INPP5B	-1.13401	14.1458	-2.93161	0.00717327	0.0417856
seq.12796.44	NUDT3	0.607425	9.13998	2.93004	0.00720006	0.0418319
seq.6940.18	JPH1	0.178765	10.6098	2.9293	0.00719348	0.0418319
seq.17332.3	ADPRS	-0.482286	14.079	-2.92958	0.00719624	0.0418319
seq.25286.33	RABGAP1L	-0.519577	13.4407	-2.92817	0.0072223	0.0419246
seq.12396.19	HIBCH	-1.0151	13.4142	-2.92791	0.00723658	0.0419709
seq.10959.125	BET1L	0.147932	8.63952	2.92554	0.00725804	0.0420588
seq.8369.102	DAG1	0.152749	9.07866	2.92455	0.00727526	0.0421219
seq.21166.1	CTDSP1	-0.916382	15.0511	-2.92316	0.00731868	0.0423365
seq.2447.7	PLA2G2E	0.194632	8.62807	2.92245	0.00732833	0.0423556
seq.3339.33	THBS2	0.698489	13.7918	2.92092	0.00735767	0.0424883
seq.24417.22	RABEP1	-0.925075	12.7493	-2.9202	0.00737028	0.0425243
seq.11572.4	DNM2	-0.669688	13.2867	-2.91836	0.00740248	0.0426362
seq.23266.62	MITD1	-0.971255	12.1502	-2.9184	0.00740185	0.0426362
seq.8261.51	STOM	0.130658	10.1689	2.91678	0.00741079	0.0426472
seq.21987.76	LPL	0.219613	11.745	2.91479	0.00744581	0.042738
seq.13604.27	NEURL1	0.183502	10.4192	2.91525	0.00743771	0.042738
seq.13596.3	RAB27B	-0.470759	13.2971	-2.91535	0.00744421	0.042738
seq.7146.16	PDIA4	0.175722	10.1076	2.91298	0.0074779	0.0427749
seq.8418.30	CTNNB1	-0.165457	10.4449	-2.91358	0.00746724	0.0427749
seq.3115.64	MAPK1	-0.638622	11.6974	-2.91443	0.00747176	0.0427749
seq.10075.75	ACBD6	-1.13038	10.6613	-2.91434	0.00747343	0.0427749
seq.18830.1	ITLN1	0.3968	11.3248	2.91288	0.00749934	0.0427873
seq.4455.89	MFGE8	0.333402	7.9793	2.91304	0.00749643	0.0427873
seq.9760.13	MAPK9	-0.846603	12.4981	-2.91327	0.00749241	0.0427873
seq.18315.38	RTP4	-1.04594	11.5611	-2.91245	0.00750703	0.0427946
seq.9277.16	REG3A	-0.464819	11.704	-2.91101	0.00753268	0.0428736
seq.20398.60	POP7	-0.592822	14.9442	-2.91095	0.00753376	0.0428736
seq.2567.5	CFI	0.196308	15.8987	2.9093	0.00754354	0.0428926
seq.3825.18	MAPK8	-0.481075	10.5893	-2.90954	0.00755886	0.0429431
seq.19166.15	RPS19	0.410721	13.6679	2.90703	0.00758427	0.0429775
seq.15441.6	GM2A	0.239804	10.1699	2.90807	0.00757861	0.0429775
seq.10731.10	HS3ST5	-0.313507	11.5581	-2.90797	0.00757316	0.0429775
seq.13452.113	SMIM13	0.14812	9.75218	2.90594	0.00760384	0.0430518
seq.19126.4	RPRD1B	0.167381	11.7415	2.90151	0.00768415	0.0432859
seq.8068.43	MYORG	-0.198204	9.65448	-2.90321	0.00766163	0.0432859
seq.12812.25	ACYP2	-0.522605	13.9333	-2.90308	0.00767168	0.0432859
seq.19277.4	TSTD1	-0.612718	12.6876	-2.9027	0.00768245	0.0432859
seq.18222.34	SH3GLB2	-0.755938	13.5937	-2.90382	0.00766205	0.0432859
seq.3848.14	GAPDH	-0.804357	13.0559	-2.90362	0.00766571	0.0432859
seq.10440.26	CLMP	-0.238295	10.0643	-2.90206	0.0076907	0.0432862
seq.20181.17	ITGA11	0.163074	9.18231	2.8998	0.00771533	0.0433882
seq.4984.83	ESD	-0.186427	9.89611	-2.8994	0.00772328	0.0433962
seq.7957.2	SCG3	-0.477277	13.408	-2.89929	0.00773516	0.0434264
seq.9436.2	ID1	0.15291	9.295	2.89746	0.00775822	0.0434461
seq.19383.131	CINP	-0.297747	10.3505	-2.89923	0.00774579	0.0434461
seq.19503.2	SNX3	-0.365403	11.7535	-2.89837	0.00775451	0.0434461
seq.25260.62	FAM219B	0.187743	9.55834	2.89582	0.00779499	0.0436153
seq.17454.15	EGFL6	0.381955	10.4427	2.89495	0.00782468	0.0436714
seq.6107.3	CELA1	0.306884	15.609	2.89452	0.00781241	0.0436714
seq.12625.138	KLHL7	-0.180109	10.4636	-2.89392	0.00782355	0.0436714
seq.14021.81	MED4	-0.202107	10.3364	-2.89332	0.00783578	0.0436968
seq.21996.28	NUB1	-0.573405	13.9052	-2.89362	0.00784922	0.0436986
seq.21188.38	RWDD4	-0.726103	13.0457	-2.89366	0.00784853	0.0436986
seq.12957.62	UQCRB	0.157418	8.59619	2.89178	0.00786335	0.0437042
seq.9231.23	BPNT2	-0.37672	10.6437	-2.89298	0.00786107	0.0437042
seq.21104.37	UBL5	-0.500284	12.7031	-2.89206	0.00787835	0.0437511
seq.5013.2	CLIC1	-0.579882	15.2139	-2.89121	0.00789409	0.043802
seq.9595.11	B4GALT2	-0.315859	10.4032	-2.89006	0.00791566	0.0438852
seq.10916.44	PLA2R1	-0.512849	11.9651	-2.88929	0.00793008	0.0439285
seq.9182.3	LRP1	-0.184112	10.8014	-2.88671	0.0079581	0.0439377
seq.23617.15	HYPK	-0.321167	11.0147	-2.88777	0.00795593	0.0439377
seq.20213.82	HSPA6	-0.631537	12.0238	-2.88826	0.00794948	0.0439377
seq.18319.7	PDHX	-0.908313	12.1328	-2.88828	0.00794903	0.0439377
seq.11174.8	THSD7A	0.247366	10.8511	2.88629	0.00796829	0.0439575
seq.3875.62	ARID3A	-0.414256	9.51802	-2.88672	0.00797844	0.0439771
seq.12340.17	AARS1	-0.791682	13.5045	-2.88636	0.00798524	0.0439782
seq.10917.40	GNGT2	0.276516	9.24588	2.88534	0.00800436	0.0440471
seq.5353.89	IL1RN	0.355728	10.9857	2.88368	0.00803596	0.0441472
seq.12431.13	PELO	0.305201	11.5877	2.88226	0.00804242	0.0441472
seq.20586.18	CNTN3	-0.397545	10.1935	-2.8838	0.00803356	0.0441472
seq.5936.53	TNF	0.233133	9.14614	2.88261	0.00805616	0.0441862
seq.11178.21	SVEP1	0.387714	10.7392	2.88095	0.00808784	0.044271
seq.3327.27	NTN4	0.337288	12.5108	2.87968	0.00809155	0.044271
seq.17377.1	AKR1C3	-0.280685	10.3179	-2.88134	0.00808035	0.044271
seq.20090.63	UBE2E3	-0.473443	10.669	-2.87972	0.00811148	0.0443436
seq.6525.17	DUSP13	-0.39214	12.0436	-2.8791	0.00811926	0.0443498
seq.20161.41	NCAM1	-0.333247	15.5903	-2.87785	0.00812674	0.0443543
seq.6551.94	SERPINA12	0.831405	12.4447	2.87641	0.00817498	0.0443868
seq.12701.1	EIF1B	0.789186	13.949	2.87679	0.00816775	0.0443868
seq.17743.14	UBE2A	0.205886	9.76502	2.87725	0.00814691	0.0443868
seq.25066.32	GYG2	0.1687	9.03427	2.87597	0.00816509	0.0443868
seq.10000.28	CRYBB2	-0.167302	10.0666	-2.87665	0.00814985	0.0443868
seq.6647.55	UBC	-0.235112	12.7792	-2.87648	0.00815295	0.0443868
seq.23392.41	PLEKHA3	-0.734188	10.5748	-2.87619	0.00817932	0.0443868
seq.10085.25	STAR	0.211525	10.2791	2.87345	0.00821381	0.0445377
seq.21730.56	USP19	-0.653121	11.6634	-2.87369	0.00822765	0.0445765
seq.16913.8	RNASET2	0.263199	10.7404	2.87214	0.00824844	0.0446528
seq.11493.169	DYNLL2	-0.550799	14.6446	-2.87107	0.00827593	0.044729
seq.8975.26	CNOT9	-0.969301	13.7765	-2.87138	0.00827267	0.044729
seq.4562.1	NXPH1	0.396867	13.5913	2.86944	0.00828977	0.0447674
seq.13621.31	AP2A2	-0.734529	15.9119	-2.87	0.00829964	0.0447844
seq.15506.34	LRP12	0.242903	9.96774	2.86924	0.00831015	0.0448049
seq.15405.23	IFNA4	0.139287	8.68545	2.86783	0.00832134	0.0448289
seq.2900.53	CCL14	0.590006	12.7122	2.86723	0.00835411	0.0449328
seq.12871.10	TWF1	-0.480269	12.2183	-2.86733	0.00835203	0.0449328
seq.20430.8	NPPC	0.114403	9.52875	2.86289	0.0084189	0.0451356
seq.11377.19	ADH7	-0.377247	11.9585	-2.86357	0.00841379	0.0451356
seq.13929.27	CROT	-0.873651	11.0141	-2.86477	0.00840257	0.0451356
seq.3453.87	LYN	-0.937898	15.5153	-2.86396	0.00841871	0.0451356
seq.7778.104	CARD19	-0.144201	10.2787	-2.86174	0.00844175	0.0452217
seq.12433.8	ARL11	-0.226601	12.174	-2.86085	0.00845955	0.0452807
seq.14031.18	FGF7	0.192023	8.2983	2.85943	0.00850588	0.0454921
seq.12018.84	TPK1	-0.111931	10.5064	-2.85644	0.00854801	0.0456808
seq.7743.5	TIMM50	-0.344401	9.21425	-2.856	0.00857805	0.0458046
seq.15432.1	OTOR	0.509236	10.5632	2.85457	0.00860701	0.045858
seq.21244.57	NPM1	0.439309	12.0119	2.85448	0.0086087	0.045858
seq.2867.52	AKT1	-0.870907	11.9746	-2.85473	0.00860375	0.045858
seq.10462.14	INSL5	0.529622	9.49097	2.85089	0.00868189	0.0459175
seq.13720.95	PRTN3	0.317668	11.1633	2.85195	0.00865401	0.0459175
seq.3356.50	CA7	0.211879	7.82791	2.85231	0.00865282	0.0459175
seq.14064.21	PGLYRP1	0.154609	8.76653	2.85033	0.00867186	0.0459175
seq.4162.54	TF	-0.190734	17.6723	-2.85175	0.00864285	0.0459175
seq.4138.25	IL20	-0.255232	8.97605	-2.85195	0.00866015	0.0459175
seq.5132.71	IL27RA	-0.293438	13.9123	-2.85067	0.00866494	0.0459175
seq.16908.5	OMG	-0.442262	11.8707	-2.85141	0.00867125	0.0459175
seq.19189.2	USP14	-0.508991	15.7435	-2.85108	0.008675	0.0459175
seq.20444.12	TPPP3	-0.287439	11.6562	-2.84944	0.00869008	0.0459244
seq.11816.84	JAK2	-0.932984	14.6191	-2.84816	0.00873782	0.0461401
seq.18208.3	CCNB2	0.324473	11.4274	2.84747	0.00874817	0.0461438
seq.7268.12	IFNA4	0.236954	10.0553	2.84745	0.00875237	0.0461438
seq.21152.25	EYA2	0.170412	10.3553	2.846	0.00876082	0.0461519
seq.10551.7	LAT	0.922847	11.5534	2.84485	0.00880607	0.0462076
seq.7787.25	LILRA5	0.359863	11.3948	2.84586	0.0087851	0.0462076
seq.6210.100	IFNA5	0.151549	9.67133	2.84402	0.00880171	0.0462076
seq.23000.22	NLGN1	-0.19001	8.26413	-2.84544	0.00879091	0.0462076
seq.12861.13	TMOD3	-0.674039	16.1936	-2.84549	0.00879274	0.0462076
seq.23363.41	PCBP2	-0.751737	15.234	-2.84289	0.00884684	0.046385
seq.9526.3	CLPSL1	0.445937	9.28443	2.84245	0.00885587	0.0463958
seq.14143.8	H2BC21	1.05022	12.7487	2.84021	0.00890273	0.0464224
seq.20568.3	FREM1	0.299284	9.91834	2.84133	0.00887922	0.0464224
seq.20449.72	JOSD1	0.149605	9.65322	2.83928	0.00890033	0.0464224
seq.5098.79	KLRF1	-0.1175	9.60224	-2.8398	0.00888955	0.0464224
seq.13642.90	IFIT3	-0.335727	10.0784	-2.84034	0.00890003	0.0464224
seq.15514.26	BCHE	-0.401166	13.0378	-2.83992	0.00888697	0.0464224
seq.14599.18	STAB1	0.227465	10.0446	2.83888	0.00892802	0.0465178
seq.3635.76	OCIAD1	-0.123211	10.2368	-2.83686	0.0089512	0.0465658
seq.17683.2	COMMD9	-0.668997	11.7334	-2.83812	0.0089465	0.0465658
seq.17509.6	HPD	0.174403	9.78367	2.83541	0.00898188	0.046689
seq.19635.69	FGL2	0.391341	10.6508	2.83251	0.00906518	0.0470852
seq.19586.89	RAB3C	-0.886171	15.7835	-2.83181	0.00908007	0.0471259
seq.3714.49	CKB|CKM	-0.722753	10.7316	-2.83117	0.00909379	0.0471603
seq.19281.86	MAFG	0.317328	10.8932	2.82941	0.00913135	0.0472435
seq.8946.38	NR1H4	0.159627	10.1873	2.82896	0.00911901	0.0472435
seq.8059.1	THPO	-0.150212	9.97203	-2.8278	0.00914397	0.0472435
seq.8956.96	SCARF2	-0.253854	10.4926	-2.82887	0.00913991	0.0472435
seq.23318.60	PCTP	-0.415097	11.9778	-2.82876	0.00914527	0.0472435
seq.12376.85	CDKN2D	-0.802031	12.886	-2.82683	0.00918685	0.0474215
seq.24493.10	MTMR7	-0.26463	11.857	-2.82437	0.00921778	0.0475443
seq.23350.66	FAM118B	-0.889025	10.8592	-2.82479	0.00923096	0.0475755
seq.8659.68	MPIG6B	-0.0986112	9.41323	-2.82314	0.00924451	0.0476085
seq.10015.119	KCNAB2	-0.166271	10.0036	-2.82062	0.00929941	0.0478543
seq.11830.48	PTPN11	-0.678505	15.7415	-2.82079	0.00931786	0.0479122
seq.15431.31	OTC	0.612454	10.5897	2.8199	0.00933723	0.0479748
seq.4292.5	NAPA	-0.661255	13.562	-2.81915	0.0093537	0.0480224
seq.13745.10	PKD2	0.100838	8.86442	2.81528	0.00941661	0.0483082
seq.3200.49	KLK13	0.206829	10.9683	2.81418	0.00944091	0.0483584
seq.24902.84	GPHN	-0.615637	10.015	-2.81529	0.00943877	0.0483584
seq.4429.51	CHST6	0.183405	9.34316	2.81224	0.00949337	0.0485897
seq.9235.3	PLXDC1	0.290101	13.8573	2.81021	0.00952925	0.0487359
seq.22523.4	PABPC5	0.200256	8.13937	2.81067	0.00953776	0.0487421
seq.12436.84	GSTO1	0.23229	10.8161	2.80953	0.00954592	0.0487464
seq.24289.1	LSMEM1	0.13058	10.9932	2.8087	0.0095629	0.0487957
seq.19808.26	RAB3D	-0.835005	15.0918	-2.80904	0.00957798	0.0488001
seq.23312.16	RABL3	-0.925637	11.0754	-2.80902	0.00957841	0.0488001
seq.16760.2	IL26	0.487091	12.3514	2.80379	0.00969628	0.0493575
seq.13470.43	PTH1R	0.142303	10.4815	2.80251	0.00970262	0.0493575
seq.25910.1	FCGBP	0.324946	12.8516	2.80151	0.00972541	0.049398
seq.23387.18	TIPRL	-0.591258	15.8516	-2.8026	0.00972344	0.049398
seq.20215.45	ITGAV|ITGB1	0.198945	8.51777	2.80202	0.00973659	0.0494171
seq.8382.47	MAPKAPK5	-1.70351	13.4034	-2.80126	0.00975387	0.0494671
seq.15324.58	FTL	1.02963	12.1864	2.7991	0.0098032	0.0496417
seq.13926.1	RMI1	0.163212	11.1879	2.79841	0.00979613	0.0496417
seq.19287.59	DENR	-0.348688	10.6621	-2.79827	0.00982236	0.049701
seq.13447.42	SPRN	0.382475	12.0246	2.79625	0.00985536	0.0497547
seq.14073.31	HPX	-0.189898	17.5429	-2.79643	0.0098418	0.0497547
seq.21475.137	TXNL1	-0.574972	12.0867	-2.79711	0.00984903	0.0497547
seq.18878.15	GREM1	0.182983	9.83206	2.79558	0.00986384	0.0497597
seq.16288.17	EPHA4	-0.302397	14.8331	-2.79271	0.00992777	0.0499311
seq.21128.2	CDK2	-0.622722	12.5068	-2.79422	0.00991575	0.0499311
seq.3381.24	LYN	-0.699651	16.8975	-2.79371	0.00992756	0.0499311
seq.12687.2	DECR1	-0.900822	14.1871	-2.79385	0.00992421	0.0499311
seq.23537.4	SP6	0.226631	11.4422	2.79218	0.00994001	0.0499549
seq.14048.7	IL1RAP	-0.337224	11.1438	-2.79275	0.00994988	0.0499668
seq.21526.88	IZUMO1	0.30455	9.70894	2.79226	0.00996118	0.0499859

## Sheet: Prot 6 wk ARFvHealthy
somaid	symbol	logFC	AveExpr	t	P.Value	adj.P.Val
seq.8351.17	PRSS57	1.98661	10.1859	15.0971	1.43567e-15	9.56729e-12
seq.8989.40	SCUBE1	2.43402	9.11762	14.4413	4.66099e-15	1.55304e-11
seq.10045.47	CUL3	0.693352	9.89099	14.0485	9.62396e-15	2.1378e-11
seq.25048.30	PACSIN2	3.52103	14.4962	11.4684	1.68329e-12	2.2435e-09
seq.13738.8	INHBA	1.60569	9.59721	11.5659	1.36585e-12	2.2435e-09
seq.14094.29	HBEGF	2.46976	10.1961	11.3623	2.1154e-12	2.34951e-09
seq.14146.92	H3C1	-2.73166	12.2448	-11.1073	3.68445e-12	3.5076e-09
seq.8352.26	SIGLEC12	-0.645914	11.3363	-11.0142	4.52014e-12	3.76528e-09
seq.11387.3	ATF6B	1.41828	10.2175	10.8659	6.27488e-12	4.6462e-09
seq.3314.74	GFRA1	1.01411	9.48489	10.7762	7.66372e-12	5.1071e-09
seq.3070.1	IL2	1.17885	10.7965	10.1175	3.42763e-11	2.07652e-08
seq.11275.94	LRP1B	0.541353	10.5488	9.97912	4.72873e-11	2.62602e-08
seq.2946.52	CFD	0.838439	14.7333	9.58982	1.1849e-10	6.07397e-08
seq.20133.1	MAGEA3	-1.52406	12.1716	-9.42289	1.76761e-10	8.41381e-08
seq.6998.106	ASPH	0.771247	11.0817	9.27773	2.51031e-10	1.11525e-07
seq.13117.232	CHKB	-1.50677	13.2804	-9.15892	3.35207e-10	1.39614e-07
seq.17450.51	HARS1	2.20228	14.8733	8.80963	7.92858e-10	3.10801e-07
seq.25413.80	GAGE2B	-1.23871	12.6206	-8.74893	9.22314e-10	3.41461e-07
seq.24721.17	GOLPH3	-1.25426	12.9508	-8.71246	1.01028e-09	3.54343e-07
seq.14098.28	CARS1	1.22427	12.1136	8.53812	1.5654e-09	5.21592e-07
seq.19335.2	JPT1	-1.05061	13.0136	-8.31914	2.72858e-09	8.65868e-07
seq.24244.81	RILP	1.56522	10.0867	8.12573	4.48022e-09	1.3571e-06
seq.14603.51	KIAA0040	0.822084	10.8305	8.02644	5.78971e-09	1.6775e-06
seq.10054.3	GAN	-0.314281	8.8669	-7.81509	1.00348e-08	2.67489e-06
seq.8942.2	MRPL21	-0.630382	10.9318	-7.82361	9.8136e-09	2.67489e-06
seq.25108.6	ATE1	1.24194	11.4628	7.69631	1.37022e-08	3.51197e-06
seq.8280.238	VTN	-0.386061	11.1895	-7.67976	1.4312e-08	3.53242e-06
seq.19154.41	SERPINE2	1.59825	13.8045	7.56174	1.95418e-08	4.65096e-06
seq.22383.21	MITF	1.20603	9.16074	7.52455	2.15644e-08	4.79017e-06
seq.12759.47	ILF3	0.806241	10.0707	7.52824	2.13547e-08	4.79017e-06
seq.3217.74	SERPINE2	1.02822	12.023	7.45721	2.57853e-08	5.543e-06
seq.16617.14	CASP14	-0.66515	9.99821	-7.32402	3.67786e-08	7.65914e-06
seq.22985.160	IGFBP2	0.899639	15.0532	7.24822	4.50576e-08	8.83129e-06
seq.13473.55	ITPKA	-0.2436	10.5484	-7.25924	4.37451e-08	8.83129e-06
seq.9259.35	TNFRSF21	0.612261	12.0783	7.23557	4.66136e-08	8.87522e-06
seq.6406.3	NMES1	-0.92447	12.6561	-7.18071	5.40178e-08	9.99929e-06
seq.22005.8	PDP1	-0.401112	10.6534	-7.0042	8.69954e-08	1.56686e-05
seq.3831.21	PTEN	1.08957	9.73921	6.97325	9.46109e-08	1.58356e-05
seq.24266.2	MEF2D	0.336248	10.4148	6.98084	9.26834e-08	1.58356e-05
seq.13933.276	NAB1	-0.873159	13.3142	-6.97153	9.50519e-08	1.58356e-05
seq.7202.107	SEMA6C	0.417384	9.00417	6.87719	1.22834e-07	1.9965e-05
seq.2505.49	GFRA3	0.581259	10.7272	6.81175	1.46821e-07	2.27539e-05
seq.12442.4	RHOD	-0.266551	8.49127	-6.81761	1.44494e-07	2.27539e-05
seq.8660.33	OLFML3	-0.908074	13.2677	-6.7461	1.75672e-07	2.66063e-05
seq.2911.27	MDK	0.694651	10.2798	6.62758	2.43125e-07	3.60041e-05
seq.22402.12	H2AC1	1.3207	10.9882	6.58842	2.70755e-07	3.92242e-05
seq.21244.57	NPM1	0.705384	12.1607	6.46189	3.83765e-07	5.31421e-05
seq.3322.52	LRIG3	0.61121	12.6486	6.47027	3.74981e-07	5.31421e-05
seq.13678.169	CFD	-0.766373	14.4692	-6.45536	3.90751e-07	5.31421e-05
seq.22141.59	PFKFB1	1.10514	11.7966	6.43516	4.13183e-07	5.4666e-05
seq.3520.58	TGFB3	0.191929	8.37839	6.43066	4.18362e-07	5.4666e-05
seq.22403.13	H2BC12	1.21688	9.47537	6.31937	5.694e-07	7.06492e-05
seq.5618.50	FAM3B	-0.625908	11.641	-6.32756	5.56618e-07	7.06492e-05
seq.7638.30	LMAN2	-0.941554	13.781	-6.31742	5.72487e-07	7.06492e-05
seq.5484.63	RPS3A	0.876661	10.5239	6.30415	5.93972e-07	7.19678e-05
seq.3591.51	CDH6	-0.57236	11.9758	-6.28318	6.29565e-07	7.49182e-05
seq.12848.9	ARHGEF2	-0.343932	11.0245	-6.27465	6.44662e-07	7.5369e-05
seq.23342.4	ARRDC5	1.05079	10.829	6.26766	6.57313e-07	7.55229e-05
seq.6213.10	CGB2	0.267802	10.0983	6.24956	6.91222e-07	7.80729e-05
seq.11219.95	FGFBP3	1.18932	10.3032	6.1555	8.98074e-07	9.9746e-05
seq.18823.52	H2BU1	1.66582	11.1436	6.09553	1.06159e-06	0.000115974
seq.2742.68	SIGLEC7	0.380621	10.0312	6.04705	1.2155e-06	0.000130647
seq.9835.16	ALDH1A3	0.987717	12.2368	6.03116	1.2707e-06	0.000133516
seq.14029.42	COPS2	-0.593931	12.2782	-6.02792	1.28227e-06	0.000133516
seq.5939.42	TNFSF12	0.740982	9.60573	5.96715	1.51988e-06	0.000155823
seq.6491.59	KLK15	-0.306848	10.8058	-5.95609	1.5677e-06	0.00015829
seq.6461.54	APOC3	0.552833	11.0503	5.93865	1.64616e-06	0.000161323
seq.11833.83	FXN	-0.246815	9.96623	-5.94	1.63997e-06	0.000161323
seq.16773.29	SCUBE3	0.710333	8.20038	5.92386	1.7158e-06	0.000165712
seq.18403.25	AMPD2	1.91637	10.5894	5.8884	1.89514e-06	0.000177436
seq.5598.3	GREM2	0.605649	11.8001	5.89048	1.8841e-06	0.000177436
seq.7131.207	TNC	0.545635	11.468	5.88429	1.91707e-06	0.000177436
seq.23290.3	SMN1	0.585658	12.1702	5.86668	2.01416e-06	0.00018056
seq.25209.15	FXYD2	0.330297	11.3299	5.87194	1.98466e-06	0.00018056
seq.13423.94	PRXL2A	-0.214754	10.431	-5.8588	2.0592e-06	0.00018056
seq.23622.128	INIP	-0.769038	13.1907	-5.86338	2.03288e-06	0.00018056
seq.4916.2	IGHD	2.17401	12.8872	5.8455	2.13749e-06	0.000182618
seq.12400.25	UBE2T	-0.227712	10.2654	-5.84985	2.11157e-06	0.000182618
seq.3587.53	BMP10	0.402843	11.0927	5.81909	2.302e-06	0.000194184
seq.25266.14	OSBPL1A	-0.560275	11.7576	-5.80017	2.42765e-06	0.000201131
seq.17820.170	MLF1	-0.63118	12.588	-5.79767	2.44472e-06	0.000201131
seq.6255.74	CPXM1	1.40548	12.4447	5.79208	2.48345e-06	0.000201826
seq.10731.10	HS3ST5	-0.409794	11.4895	-5.77756	2.58683e-06	0.000207694
seq.17319.1	SELENOH	0.552446	9.64328	5.76927	2.64779e-06	0.000210058
seq.2692.74	PLA2G2A	1.49894	10.8344	5.74987	2.79622e-06	0.000219223
seq.15515.2	SAA1	2.97738	12.7822	5.73969	2.87744e-06	0.000222968
seq.21660.4	SAR1B	-1.29182	13.3292	-5.69466	3.26597e-06	0.000250166
seq.12701.1	EIF1B	1.07383	14.1273	5.62372	3.98799e-06	0.000302
seq.5648.28	CTRB2	-0.859489	8.63578	-5.61222	4.11933e-06	0.000308441
seq.13236.25	WNT3A	-0.69275	12.3131	-5.5863	4.43156e-06	0.000328132
seq.3204.2	LTA4H	0.64882	11.5352	5.53782	5.08052e-06	0.00037205
seq.5465.32	HS6ST1	0.373037	10.3468	5.53046	5.18709e-06	0.000375726
seq.8819.3	IGFBP2	1.20157	13.8132	5.52278	5.30066e-06	0.000379824
seq.14144.3	H2AW	1.07561	11.3386	5.4421	6.65579e-06	0.000471853
seq.11263.57	CASQ1	-0.375023	12.8825	-5.42927	6.90137e-06	0.000484113
seq.16317.20	DSG3	1.11731	11.2484	5.41925	7.09934e-06	0.00048652
seq.9037.1	STX18	-0.239471	10.1261	-5.4165	7.1547e-06	0.00048652
seq.24712.6	GTPBP10	-0.344569	9.27258	-5.42053	7.07367e-06	0.00048652
seq.4924.32	MMP1	0.89896	14.8751	5.4024	7.44527e-06	0.000496153
seq.3401.8	PTPN2	0.184411	9.21221	5.4041	7.40956e-06	0.000496153
seq.13748.4	CCL8	0.425649	8.40061	5.38988	7.71327e-06	0.000508923
seq.20076.7	MNDA	1.60029	16.0985	5.38599	7.79837e-06	0.000509493
seq.6289.78	ARHGAP36	0.376592	9.61898	5.36569	8.25873e-06	0.000529194
seq.7246.4	FREM2	0.151981	9.05029	5.36885	8.1852e-06	0.000529194
seq.22476.115	HOXD4	-0.361651	10.2623	-5.35898	8.41661e-06	0.000534174
seq.22783.40	SPI1	1.99341	10.7665	5.35094	8.61001e-06	0.000541294
seq.8890.9	TMEM132B	0.572638	12.4774	5.34586	8.7343e-06	0.000543976
seq.21604.2	CUTA	0.282548	10.2362	5.33143	9.09793e-06	0.000561376
seq.9114.84	UMODL1	-0.250475	9.81179	-5.3044	9.81988e-06	0.000600364
seq.25265.8	FNBP1	1.43757	11.1691	5.29374	1.012e-05	0.000613087
seq.22844.4	ZSWIM7	-0.643551	9.92579	-5.28917	1.02516e-05	0.000615466
seq.13552.7	SWAP70	0.720648	11.3365	5.28461	1.03845e-05	0.000617876
seq.15667.39	BMP4	0.496613	10.0964	5.2724	1.07493e-05	0.000633921
seq.7267.2	SPTLC2	0.293163	10.1294	5.2676	1.08959e-05	0.000636933
seq.9250.87	DEFA1	0.684023	11.8809	5.25267	1.13654e-05	0.000658603
seq.8233.2	ITIH5	0.457141	11.4987	5.23114	1.20786e-05	0.000693893
seq.6440.31	MFAP5	0.428349	11.7237	5.19688	1.33066e-05	0.000751484
seq.4973.18	BIRC3	-0.279941	8.76728	-5.19706	1.32999e-05	0.000751484
seq.9987.30	LRRC25	-0.318668	10.3721	-5.19308	1.34505e-05	0.000753228
seq.21643.8	RPS20	0.520845	10.7281	5.17176	1.42856e-05	0.000787505
seq.11266.8	SELPLG	-0.515481	11.8983	-5.17143	1.42989e-05	0.000787505
seq.19115.13	CMBL	-0.230696	9.35749	-5.15903	1.48093e-05	0.00080893
seq.24689.9	CAVIN1	0.826918	11.1344	5.14594	1.53672e-05	0.000828046
seq.5882.34	EEF1B2	-0.422605	9.07089	-5.14501	1.54078e-05	0.000828046
seq.8469.41	IGFBP2	1.25264	14.0685	5.13402	1.58941e-05	0.000847348
seq.14143.8	H2BC21	1.27603	12.8135	5.11208	1.69108e-05	0.000880419
seq.8265.225	TMPO	0.477988	13.0581	5.11412	1.68136e-05	0.000880419
seq.23370.39	KCNAB3	-0.454335	10.2406	-5.11291	1.68711e-05	0.000880419
seq.22483.109	KRT71	0.584573	10.5228	5.06141	1.95146e-05	0.00100609
seq.2783.18	CCL3L1	0.486331	11.0731	5.05939	1.96265e-05	0.00100609
seq.2681.23	HGF	0.755214	10.5866	5.04995	2.01569e-05	0.00102539
seq.8388.24	SPAST	-0.241847	9.57894	-5.03489	2.10335e-05	0.00106187
seq.25414.11	LCE3B	-0.452705	9.83718	-5.00381	2.29641e-05	0.00115062
seq.4569.52	SORCS2	-1.13221	10.1525	-4.99773	2.3362e-05	0.00116182
seq.4553.65	HDGFL2	0.3223	9.5228	4.98941	2.39177e-05	0.00118002
seq.6555.58	STOML2	-0.290869	10.4433	-4.98698	2.40821e-05	0.00118002
seq.13740.51	FRZB	0.654636	10.7922	4.97861	2.46588e-05	0.00119946
seq.10086.39	CBS	-0.315362	11.2791	-4.96407	2.56921e-05	0.00124067
seq.2570.72	IGFBP2	1.16514	12.2249	4.95348	2.64722e-05	0.00126914
seq.5301.7	CCL11	0.606196	12.7439	4.94783	2.68983e-05	0.00128036
seq.6572.10	LRRTM4	-0.204702	9.98072	-4.92826	2.84272e-05	0.00134354
seq.13992.12	NSF	-0.403833	11.0977	-4.89171	3.15176e-05	0.00147911
seq.6543.182	PRLH	-0.408748	11.1459	-4.87193	3.3327e-05	0.00155308
seq.19767.20	CCNE1	0.445278	11.948	4.86389	3.40917e-05	0.00156681
seq.6390.18	NPS	-0.298401	13.2214	-4.8648	3.40048e-05	0.00156681
seq.11318.20	APOA5	-0.430458	10.7902	-4.85622	3.48383e-05	0.00159016
seq.2635.61	LAYN	0.374195	11.3824	4.84155	3.63105e-05	0.00164608
seq.19242.21	PFDN1	0.301858	10.5015	4.83313	3.71833e-05	0.00165193
seq.25967.34	TIMP1	0.299355	15.1316	4.83479	3.70096e-05	0.00165193
seq.7991.54	IQCF1	-0.480013	10.9065	-4.8341	3.70816e-05	0.00165193
seq.7962.11	SPINK8	-0.377917	9.49005	-4.82723	3.78079e-05	0.00166856
seq.4130.71	FGF6	-0.36543	9.48689	-4.81323	3.93301e-05	0.00172431
seq.3336.50	TFPI	0.589075	14.345	4.80877	3.98288e-05	0.00173477
seq.19166.15	RPS19	0.477475	13.7657	4.79811	4.10444e-05	0.0017577
seq.3628.3	MAP2K2	0.467832	11.6486	4.79916	4.0923e-05	0.0017577
seq.6986.17	HS3ST3B1	0.200258	9.8428	4.79722	4.11466e-05	0.0017577
seq.21802.53	NEIL1	0.405632	14.4549	4.79379	4.15468e-05	0.00176349
seq.4125.52	AGER	1.72965	10.7727	4.76418	4.51638e-05	0.0018929
seq.8545.14	C17orf78	-0.176788	9.58778	-4.76421	4.51601e-05	0.0018929
seq.14123.34	VSIR	-0.314376	12.6734	-4.75966	4.57432e-05	0.0019052
seq.5440.26	TNNI2	-0.574559	11.6038	-4.75524	4.63172e-05	0.00191713
seq.7192.37	IFNLR1	0.459378	9.66395	4.75301	4.66082e-05	0.00191727
seq.6064.4	ERP44	-0.569885	14.4947	-4.75078	4.69029e-05	0.00191755
seq.5384.67	BRF1	0.321478	12.0036	4.74055	4.82742e-05	0.00196158
seq.19158.1	PCLAF	0.559476	11.7555	4.73705	4.87526e-05	0.00196901
seq.13392.13	ATP1B1	-0.499934	9.65708	-4.72579	5.03242e-05	0.00202024
seq.5803.24	C3	0.645987	12.6535	4.72194	5.08735e-05	0.00202371
seq.5733.61	IFNA10	-0.340004	10.9891	-4.72093	5.1018e-05	0.00202371
seq.9983.97	PRSS35	-0.289023	10.1626	-4.71106	5.24564e-05	0.00206846
seq.12934.1	HERC5	-0.341257	10.6559	-4.70137	5.3908e-05	0.00211319
seq.12585.39	ERCC1	-0.129552	9.09006	-4.69734	5.45223e-05	0.00212477
seq.12676.1	PACSIN1	1.60115	11.2262	4.69046	5.55884e-05	0.00215373
seq.9723.105	MMRN2	0.337492	9.64988	4.67352	5.83037e-05	0.00222681
seq.9398.30	GALP	-0.421922	9.45581	-4.67428	5.81799e-05	0.00222681
seq.7747.47	NDUFB11	-0.642402	12.1634	-4.67044	5.88114e-05	0.00222681
seq.7210.25	APLP1	-0.879429	11.9693	-4.67081	5.87514e-05	0.00222681
seq.6899.37	PCBD2	0.480237	10.9683	4.65175	6.19874e-05	0.00233381
seq.5594.87	MESD	-0.275067	10.4353	-4.64585	6.30246e-05	0.00235953
seq.15494.11	FGFBP1	0.288399	9.15619	4.61839	6.80856e-05	0.00253476
seq.23020.18	RGS4	0.383647	10.2976	4.61514	6.8711e-05	0.00254383
seq.25902.27	GLUD1	0.707159	10.4484	4.59374	7.29703e-05	0.00267396
seq.19135.5	NT5C3B	-0.399617	10.8527	-4.59345	7.30284e-05	0.00267396
seq.22585.5	FZD4	-0.291391	12.4261	-4.59021	7.36977e-05	0.00268372
seq.8246.9	PCSK9	0.480312	12.5038	4.57476	7.69659e-05	0.0027875
seq.4878.3	F10	0.310366	12.099	4.5665	7.87725e-05	0.00283751
seq.21322.60	GTF2E2	0.723926	9.80716	4.54745	8.31018e-05	0.0029457
seq.2715.25	EPOR	-0.267767	9.2802	-4.5491	8.27168e-05	0.0029457
seq.2977.7	EDAR	-0.600337	10.6303	-4.55053	8.23845e-05	0.0029457
seq.24679.35	ETV7	-0.727651	12.045	-4.54539	8.35828e-05	0.00294707
seq.12798.46	SLC4A8	-0.324427	9.49139	-4.54264	8.42312e-05	0.0029543
seq.11104.13	CHI3L1	1.11253	13.5863	4.53582	8.58587e-05	0.00296488
seq.7251.64	C1QTNF3	0.278635	10.3707	4.53634	8.5734e-05	0.00296488
seq.25124.21	ZBTB7A	0.278608	9.94481	4.53394	8.63124e-05	0.00296488
seq.13501.10	SLC35G2	-0.992691	12.0458	-4.5345	8.61769e-05	0.00296488
seq.14072.9	TPT1	-0.495586	12.3838	-4.5278	8.78131e-05	0.00300096
seq.16818.200	CDCP1	0.621284	11.0232	4.52398	8.8759e-05	0.00301781
seq.12817.1	GEM	-0.796809	12.3632	-4.51205	9.17803e-05	0.00310469
seq.12632.14	NAT1	-0.356047	10.8796	-4.50348	9.40119e-05	0.00316412
seq.8913.22	SIGLEC11	0.433658	11.4415	4.49315	9.67729e-05	0.00324068
seq.12804.5	GMEB2	0.588082	10.8222	4.47657	0.000101378	0.00336934
seq.8697.38	GPC1	-0.401732	11.9939	-4.47569	0.000101626	0.00336934
seq.5593.11	PDIA5	0.882749	14.8356	4.45607	0.000107369	0.00352467
seq.22397.2	XBP1	0.271306	7.66172	4.45775	0.000106866	0.00352467
seq.25094.9	ACSS2	-0.463071	12.465	-4.44468	0.000110847	0.00362101
seq.13575.40	DVL2	0.325971	12.5275	4.42692	0.000116496	0.00378698
seq.12408.333	RAB22A	-0.593969	11.1752	-4.41897	0.000119117	0.00385337
seq.4925.54	MMP13	1.19878	9.82459	4.41094	0.000121823	0.00392188
seq.8484.24	LEP	-0.743161	12.3607	-4.40402	0.000124205	0.00397933
seq.11162.37	EQTN	-0.278918	8.62371	-4.40215	0.000124855	0.00398101
seq.13497.34	EIF3J	1.04975	12.7859	4.39654	0.000126826	0.00402463
seq.9796.4	CEL	1.16511	11.0006	4.38528	0.000130881	0.00413148
seq.21393.62	AHCY	0.553714	13.2494	4.38218	0.000132022	0.00413148
seq.10506.53	PGRMC2	-0.370652	11.0324	-4.38209	0.000132053	0.00413148
seq.2431.17	CTSG	0.633078	11.0587	4.3752	0.00013462	0.00413414
seq.12428.2	LYPLAL1	-0.193282	10.2874	-4.37644	0.000134157	0.00413414
seq.12581.39	IMPA2	-0.27114	9.53316	-4.3782	0.000133498	0.00413414
seq.3029.52	CD209	-0.579692	11.2668	-4.37609	0.000134289	0.00413414
seq.2695.25	PECAM1	0.413137	10.8681	4.37212	0.000135786	0.00414483
seq.3040.59	CCL3	0.360924	10.0145	4.36936	0.000136834	0.00414483
seq.21940.12	WNT10B	0.237946	10.8085	4.37049	0.000136405	0.00414483
seq.22082.25	BEX2	-0.175248	9.96273	-4.36299	0.000139294	0.00420024
seq.5688.65	CBLN4	-0.374367	11.7285	-4.35428	0.000142721	0.00428421
seq.2683.1	C3	0.534499	13.9077	4.34715	0.000145592	0.00435077
seq.17355.56	SYT4	0.784643	10.9814	4.33414	0.000150973	0.00449143
seq.12643.4	ARRB1	0.747131	14.1683	4.32405	0.000155282	0.00455857
seq.12534.10	CALCOCO2	-0.207015	11.8911	-4.32719	0.000153929	0.00455857
seq.7886.26	SPTLC1	-0.554539	12.3599	-4.32546	0.000154674	0.00455857
seq.18893.26	ADGRG1	0.261372	10.6033	4.31869	0.000157619	0.0046069
seq.6603.18	ANOS1	-0.298801	11.3396	-4.31712	0.00015831	0.0046069
seq.12796.44	NUDT3	0.644849	9.2792	4.30468	0.000163896	0.00474872
seq.3854.24	NACA	1.02483	13.0714	4.30006	0.00016602	0.00478943
seq.10391.1	ANGPTL3	0.549088	10.6391	4.29329	0.000169181	0.00485475
seq.10603.1	HTN3	-0.563454	10.52	-4.29211	0.000169742	0.00485475
seq.6556.5	ENPP5	-0.256346	10.7394	-4.2858	0.000172748	0.00491962
seq.4785.30	SERPINA6	-0.14501	8.90388	-4.2792	0.000175954	0.00497772
seq.21734.36	C1GALT1|C1GALT1C1	-0.340716	12.6148	-4.27853	0.000176282	0.00497772
seq.9284.25	SFRP4	0.457687	11.4276	4.26482	0.000183137	0.00514946
seq.23006.19	PIP4K2B	0.75183	10.4096	4.25645	0.000187453	0.00524869
seq.9061.3	ARHGEF10	-0.237526	10.0409	-4.25332	0.000189091	0.00527239
seq.15542.19	CKMT1A	1.47847	13.7243	4.25032	0.00019068	0.00529454
seq.20913.27	EIF1	0.782996	12.6198	4.23977	0.000196354	0.00542947
seq.9187.2	HMGN1	0.920319	10.7803	4.23803	0.000197306	0.00543325
seq.16297.14	ROBO4	-0.598069	9.3401	-4.23175	0.00020078	0.00550617
seq.11135.5	MRPL55	0.467473	8.95683	4.22683	0.000203547	0.00552387
seq.4566.24	RSPO2	0.189078	8.52867	4.22618	0.000203912	0.00552387
seq.12799.65	DNAJC27	-0.136118	9.71538	-4.22829	0.000202719	0.00552387
seq.5009.11	MSN	0.993724	12.469	4.21351	0.000211216	0.00565081
seq.19111.10	UBE2M	-0.272542	11.2358	-4.21619	0.000209649	0.00565081
seq.3867.49	SEZ6L2	-0.441903	10.8406	-4.21252	0.000211801	0.00565081
seq.10513.13	KCNIP3	-0.550514	10.4592	-4.2122	0.00021199	0.00565081
seq.20947.50	DR1	0.626705	11.4504	4.20607	0.000215629	0.00567966
seq.7915.31	APLP2	0.302813	11.3436	4.20744	0.000214806	0.00567966
seq.18213.30	UBE2F	-0.359934	9.59411	-4.20792	0.00021452	0.00567966
seq.13013.41	PRKN	-0.233844	11.4716	-4.20064	0.000218899	0.00574308
seq.12478.15	RPL30	0.491524	13.6282	4.1978	0.000220636	0.00576596
seq.4157.2	F2	1.25833	11.2408	4.19423	0.000222828	0.0058005
seq.12916.3	MTCP1	-0.234152	9.81107	-4.18958	0.000225726	0.00585307
seq.17678.28	VSIG4	0.55674	11.8367	4.1849	0.000228675	0.00588375
seq.24279.30	UTP6	-0.191885	11.0127	-4.18538	0.000228367	0.00588375
seq.22468.54	H2AC11	1.0872	13.8624	4.16365	0.000242551	0.00621678
seq.12437.18	ULK3	-0.139939	9.92164	-4.15983	0.000245132	0.00625885
seq.18832.65	SAA2	0.938784	11.1933	4.1522	0.000250373	0.00627502
seq.9102.28	ZFYVE27	0.877616	11.9952	4.1521	0.000250442	0.00627502
seq.7161.25	H6PD	0.543315	12.5667	4.15505	0.000248404	0.00627502
seq.21290.66	HUS1	0.415072	10.9768	4.15208	0.000250456	0.00627502
seq.24658.98	CCDC115	-0.182036	9.43841	-4.1513	0.000250995	0.00627502
seq.8556.5	RETREG1	-0.207378	9.71198	-4.1507	0.000251415	0.00627502
seq.3044.3	CCL18	0.373419	16.5045	4.14229	0.000257334	0.00639878
seq.11425.31	RUFY1	-0.534928	12.3487	-4.1404	0.000258687	0.0064085
seq.3311.27	FCGR3B	0.424183	11.9062	4.13834	0.000260167	0.0064213
seq.18274.2	SERF2	-0.195927	10.7831	-4.13563	0.000262127	0.0064458
seq.20217.26	LMNB2	0.46031	12.5964	4.13331	0.000263813	0.00646343
seq.3613.62	FCN1	0.439664	12.6316	4.12809	0.00026765	0.00651584
seq.25296.3	AMOT	-0.350421	9.95924	-4.12775	0.000267908	0.00651584
seq.19148.58	TIMM8A	-0.411397	9.57271	-4.11275	0.000279251	0.00676702
seq.9786.310	IER3	0.406715	10.8684	4.10392	0.000286153	0.00690915
seq.18177.49	NAE1	-0.252738	10.9819	-4.09549	0.000292903	0.00704659
seq.2950.57	IGFBP4	0.286108	11.8438	4.08697	0.000299871	0.00718827
seq.12686.15	MPST	-0.320918	10.8141	-4.08462	0.000301825	0.00720918
seq.5033.27	TPM1	-0.303098	11.0394	-4.08294	0.000303228	0.00721682
seq.4987.17	FCAR	-0.235255	10.1094	-4.07609	0.00030902	0.00732849
seq.15594.47	HTRA1	0.484753	14.0528	4.07205	0.000312482	0.00737424
seq.9875.107	THOC1	0.289732	10.4163	4.07127	0.000313162	0.00737424
seq.8660.5	OLFML3	0.351164	13.5287	4.06963	0.000314576	0.00738147
seq.24647.3	APOBEC2	-0.41627	11.3061	-4.06261	0.000320734	0.00749955
seq.10574.10	B2M	1.60069	12.5416	4.05563	0.000326969	0.00761861
seq.12735.39	CSDE1	-0.249566	10.485	-4.05348	0.000328908	0.00762058
seq.3484.60	AGT	-0.289274	13.0197	-4.05175	0.000330484	0.00762058
seq.6497.10	RS1	-0.325936	11.0454	-4.05227	0.000330012	0.00762058
seq.11126.102	TRIO	-0.308891	9.28344	-4.04719	0.000334664	0.00767557
seq.8973.23	FCRL4	-0.816957	11.2213	-4.04664	0.000335173	0.00767557
seq.2949.6	PLA2G10	0.310573	10.272	4.04283	0.000338709	0.00772999
seq.15567.2	CD247	0.168963	9.25849	4.03983	0.000341519	0.00776751
seq.21863.11	NUBP2	-0.450881	11.9827	-4.03446	0.000346612	0.00785655
seq.5029.3	FAP	-0.313387	10.8733	-4.03116	0.000349772	0.00790128
seq.11347.9	TALDO1	0.379334	14.4145	4.02672	0.000354079	0.00794471
seq.14599.18	STAB1	0.245662	10.0794	4.02748	0.000353339	0.00794471
seq.5228.25	KIF23	-0.448558	9.71947	-4.02283	0.000357886	0.00800319
seq.6326.20	BMP4	0.220214	10.1872	4.0204	0.000360289	0.00802999
seq.17729.20	UBE2S	0.657592	10.4755	4.00515	0.000375734	0.0083463
seq.3864.5	RPS7	0.524103	9.93321	4.00122	0.000379817	0.00840897
seq.3077.66	F10	0.378352	11.9289	3.99425	0.00038716	0.00854315
seq.12471.47	STAU1	0.300616	11.8073	3.9861	0.000395933	0.00870791
seq.23359.25	WTAP	0.315611	12.001	3.9796	0.000403072	0.00883576
seq.7242.14	VSTM4	0.35601	10.8538	3.97517	0.000407997	0.00886616
seq.19279.42	RBP1	0.305608	10.569	3.97359	0.000409781	0.00886616
seq.4547.59	FLRT1	-0.188727	11.0619	-3.97367	0.000409684	0.00886616
seq.10908.2	GALNT13	-0.262168	10.8682	-3.97455	0.000408694	0.00886616
seq.4143.74	XCL1	0.173103	9.67749	3.97169	0.000411922	0.00888364
seq.22369.12	DMRTC2	-0.506702	10.4995	-3.9668	0.000417486	0.00897461
seq.13113.7	SPP1	-0.398977	10.9927	-3.96439	0.000420252	0.00900502
seq.8464.31	RSPO4	0.238796	9.00974	3.96061	0.000424637	0.00904557
seq.19286.30	MYL5	0.190163	10.0341	3.9602	0.000425113	0.00904557
seq.6622.90	APLN	-0.222825	10.0909	-3.95926	0.000426217	0.00904557
seq.22792.21	WARS2	0.459391	11.2133	3.94758	0.000440087	0.00929077
seq.24914.10	EZH2	-0.146443	8.37972	-3.94719	0.000440559	0.00929077
seq.20134.27	MARCO	0.38202	7.34299	3.94478	0.000443478	0.00932283
seq.11573.3	SRSF6	0.274651	9.44848	3.94347	0.000445081	0.00932711
seq.14057.68	TNFSF15	-0.313814	11.3262	-3.93608	0.00045418	0.00948795
seq.7871.16	TMEM132A	0.426501	11.7434	3.92883	0.000463295	0.00964811
seq.4551.72	ADGRG5	0.377971	9.7907	3.92716	0.000465423	0.00964943
seq.3736.60	BMP6	0.268026	10.6773	3.9265	0.000466254	0.00964943
seq.9197.4	LGALS9	0.244937	10.6421	3.91295	0.000483877	0.00998314
seq.8036.75	FSHB	-0.12499	7.7409	-3.90672	0.000492197	0.0101235
seq.9577.26	SYT2	-0.239665	10.0238	-3.90503	0.000494476	0.010139
seq.21911.17	NDP	0.463348	9.61454	3.9005	0.000500642	0.010234
seq.12406.119	DIRAS3	-0.262618	10.7388	-3.8956	0.000507394	0.0103403
seq.12537.88	PURA	-0.418822	12.3376	-3.89418	0.000509367	0.0103489
seq.6472.40	PMEL	-0.647876	12.0674	-3.89012	0.000515049	0.0104325
seq.2514.65	EFNB3	0.290554	10.3474	3.88723	0.00051914	0.0104835
seq.24684.7	GIMAP4	0.398187	11.5519	3.87149	0.000541931	0.0109107
seq.3874.8	UBE2L3	-0.441489	11.7952	-3.86639	0.000549526	0.0110302
seq.17335.18	VAMP2	-1.19638	11.7793	-3.8585	0.000561493	0.0112366
seq.5870.23	BAD	-0.569746	12.7428	-3.85635	0.000564796	0.0112689
seq.8931.124	G0S2	-0.278241	9.06707	-3.85477	0.000567225	0.0112835
seq.7211.2	RNASE1	0.473377	8.835	3.85281	0.000570274	0.0113002
seq.22496.21	LYRM1	-0.375173	12.0933	-3.85205	0.000571456	0.0113002
seq.9578.263	MANSC4	-0.281417	8.83082	-3.84807	0.000577687	0.0113897
seq.12954.71	PPARA	-0.519214	11.5866	-3.84673	0.000579802	0.0113976
seq.16758.96	HDGF	0.486792	12.8322	3.84294	0.000585819	0.0114821
seq.5604.30	HPSE	0.378178	9.58285	3.83366	0.000600821	0.0117416
seq.19438.68	SYF2	-0.250555	11.9925	-3.82979	0.000607178	0.0118311
seq.24676.105	CFAP298	-0.221429	10.0577	-3.82142	0.00062117	0.0120685
seq.2774.10	IL16	0.284196	15.0701	3.8194	0.000624593	0.0120755
seq.12787.47	ZNF134	-0.140547	8.77297	-3.81907	0.000625159	0.0120755
seq.7147.35	WFDC8	0.617451	12.1557	3.81448	0.000633021	0.0121551
seq.5813.58	EPO	0.604939	9.88763	3.81463	0.000632762	0.0121551
seq.17468.1	SUFU	0.241422	10.5797	3.81348	0.000634748	0.0121551
seq.23588.9	HSDL2	-0.491022	13.256	-3.80893	0.000642647	0.0122711
seq.21327.12	CYREN	0.190727	8.32733	3.8077	0.000644803	0.012277
seq.14049.17	IL7	0.323274	9.42977	3.80441	0.000650581	0.0123068
seq.5014.49	NCK1	-0.271108	10.3424	-3.80367	0.000651905	0.0123068
seq.23649.6	KLHL2	-0.311192	10.2009	-3.80496	0.000649623	0.0123068
seq.6706.18	ALPG	-0.463062	8.44569	-3.80195	0.000654957	0.0123295
seq.18322.15	JMJD6	-0.272308	10.4953	-3.79946	0.000659395	0.012378
seq.15576.158	RNASE3	0.65605	16.1254	3.78465	0.000686465	0.012637
seq.18873.8	CEACAM8	0.548373	12.9182	3.78913	0.00067817	0.012637
seq.4548.4	FUT3	0.209978	10.0719	3.79035	0.000675925	0.012637
seq.24638.3	FAM89B	-0.273512	12.0712	-3.78531	0.000685242	0.012637
seq.24659.6	DNAJB13	-0.290134	11.0164	-3.78496	0.000685884	0.012637
seq.25118.45	BICD1	-0.437944	12.5792	-3.78515	0.000685529	0.012637
seq.5725.1	OMD	-0.467459	12.2031	-3.78642	0.000683178	0.012637
seq.6605.17	IGFALS	-0.455202	14.8978	-3.78101	0.000693273	0.0127272
seq.21152.25	EYA2	0.217438	10.3688	3.77479	0.000705077	0.0129083
seq.12515.45	UCK2	-0.324453	10.6631	-3.77304	0.000708445	0.0129345
seq.21883.17	BMP5	0.467937	13.4723	3.7697	0.000714876	0.0130162
seq.19197.95	ACAT1	0.743436	12.4952	3.76524	0.000723583	0.0131389
seq.22055.31	FOXO1	0.42288	12.2877	3.76111	0.000731731	0.0132507
seq.5017.19	PRDX5	-0.126953	8.88867	-3.75879	0.00073634	0.013298
seq.5443.62	NPPA	0.364043	10.7159	3.75324	0.000747506	0.0134311
seq.12811.55	ZNF415	-0.15425	9.89269	-3.75312	0.000747739	0.0134311
seq.4453.83	LRRTM3	0.177194	8.13967	3.75187	0.000750278	0.0134405
seq.20994.37	PLEKHF2	1.20179	12.8777	3.74203	0.000770538	0.0137296
seq.13529.39	NAP1L2	-0.15272	10.4257	-3.74267	0.000769209	0.0137296
seq.3897.61	PDXP	-0.58629	12.7713	-3.74066	0.000773404	0.0137439
seq.13022.20	TP53I11	0.857811	11.1739	3.73863	0.000777656	0.0137461
seq.11556.19	ARFGAP1	0.252593	10.3655	3.73883	0.000777232	0.0137461
seq.10023.32	VDR	-0.257479	10.0589	-3.73613	0.000782944	0.013803
seq.21354.92	UPRT	-0.305503	9.12374	-3.73367	0.000788165	0.0138584
seq.19224.5	EIF1AY	0.496715	16.1432	3.72968	0.000796708	0.0139351
seq.8748.45	CD74	-0.15298	9.73271	-3.73	0.00079603	0.0139351
seq.2876.74	TOP1	0.550877	9.67404	3.71732	0.000823784	0.0143709
seq.18821.9	C4A|C4B	1.17589	12.7848	3.71616	0.000826364	0.0143783
seq.4991.12	GPC5	-0.271522	9.70895	-3.71499	0.000828993	0.0143865
seq.4280.47	PSMA2	0.312365	9.4919	3.71227	0.000835105	0.0144549
seq.25093.96	VANGL1	0.192905	9.39042	3.7039	0.000854203	0.0147091
seq.12834.3	KCNF1	-0.193567	10.8852	-3.70415	0.000853628	0.0147091
seq.16850.5	RGS5	0.298279	11.0604	3.69937	0.000864693	0.0147172
seq.6932.42	ITGA5	0.254185	11.1375	3.70093	0.000861067	0.0147172
seq.8906.60	LRTM2	-0.201186	12.4124	-3.70198	0.000858631	0.0147172
seq.8288.27	APOH	-0.217935	17.7309	-3.69821	0.000867417	0.0147172
seq.19361.78	MATN3	-0.382186	15.1573	-3.69799	0.00086792	0.0147172
seq.5744.12	MENT	-0.506747	11.1107	-3.69799	0.000867929	0.0147172
seq.6433.57	FAM20A	0.21579	10.7331	3.69665	0.000871069	0.014733
seq.25907.47	EML2	0.292532	10.8848	3.69394	0.00087746	0.0148035
seq.14032.2	VEGFA	0.55267	10.4412	3.68065	0.000909474	0.015272
seq.19183.164	RPL12	0.473634	13.7391	3.68051	0.00090981	0.015272
seq.14056.4	CGA	0.162959	10.3471	3.67521	0.000922915	0.015453
seq.5675.6	TNC	0.582178	12.6322	3.67243	0.000929855	0.0155302
seq.24905.22	EOLA1	-0.325464	9.35121	-3.67144	0.000932321	0.0155325
seq.9826.135	FHIT	-0.561353	11.5255	-3.66531	0.000947828	0.0157514
seq.8070.88	DLG4	-0.534968	10.0572	-3.66308	0.000953544	0.015807
seq.11565.58	ZNF23	-0.359633	8.9138	-3.66173	0.000957022	0.0158253
seq.17680.12	EPHB1	-0.349953	9.47503	-3.66034	0.000960604	0.0158452
seq.8624.16	UNC5D	-0.23115	8.92856	-3.6465	0.000997041	0.0164056
seq.8046.9	LGALS1	-0.345713	11.2691	-3.64151	0.00101049	0.0165859
seq.23602.35	NAPEPLD	-0.254001	9.6705	-3.6378	0.0010206	0.0166699
seq.11229.16	ERN1	-0.436131	11.5189	-3.6381	0.00101981	0.0166699
seq.17329.2	BDH2	0.424083	9.73272	3.63574	0.00102629	0.0167218
seq.22125.9	E2F5	0.277404	8.70185	3.63363	0.0010321	0.0167755
seq.19563.3	SEZ6L	-0.354997	12.5759	-3.62804	0.00104772	0.0169878
seq.21387.64	MEP1A	0.809355	13.5206	3.62548	0.00105495	0.0170636
seq.18294.26	SOX2	-0.112176	8.37471	-3.62176	0.00106553	0.017193
seq.9233.71	TFPI2	0.425982	9.46319	3.61508	0.00108479	0.0174615
seq.15583.18	FCRLB	0.195279	9.42158	3.61332	0.00108991	0.0175016
seq.9231.23	BPNT2	-0.257665	10.6714	-3.60997	0.00109975	0.0176171
seq.4337.49	CRP	2.04957	14.1122	3.60638	0.00111039	0.0176603
seq.5741.55	RNASE3	1.62476	12.645	3.60776	0.0011063	0.0176603
seq.24708.7	DHRS3	-0.177434	10.0579	-3.60715	0.0011081	0.0176603
seq.9869.28	NFKB1	0.622464	13.2989	3.60543	0.0011132	0.0176628
seq.6918.183	CCK	0.30205	10.669	3.60426	0.0011167	0.0176762
seq.4930.21	STC1	0.536048	10.8272	3.59745	0.00113727	0.0179592
seq.3387.1	PAK3	0.476295	10.2817	3.59654	0.00114006	0.0179606
seq.3357.67	CDK2|CCNA2	0.197764	9.11561	3.59416	0.00114734	0.0179677
seq.7203.125	RFNG	0.170297	10.9751	3.59405	0.00114766	0.0179677
seq.9377.25	KITLG	-0.316751	10.9077	-3.59287	0.00115129	0.0179677
seq.3151.6	IL2RA	-0.34764	10.3852	-3.5934	0.00114967	0.0179677
seq.7218.87	ATP1B2	0.313491	12.2401	3.59145	0.00115568	0.0179941
seq.23173.3	TIMP1	0.411779	13.1351	3.58771	0.0011673	0.0181325
seq.2813.11	AGRP	0.325139	10.0691	3.5843	0.00117801	0.0181719
seq.19511.8	DCUN1D2	0.137348	8.21556	3.58458	0.00117714	0.0181719
seq.9836.20	DCK	-0.199681	12.608	-3.58442	0.00117762	0.0181719
seq.4133.54	GZMB	0.310527	8.43605	3.58125	0.00118764	0.0182782
seq.12530.14	CKS1B	-0.242071	12.4738	-3.57796	0.00119814	0.0183972
seq.4389.2	DHH	-0.384885	9.79181	-3.57653	0.00120274	0.0184254
seq.12532.28	CDC34	-0.351406	10.9698	-3.57561	0.0012057	0.0184285
seq.3291.30	FCER2	0.368967	11.9197	3.57421	0.00121024	0.0184501
seq.21286.29	RPL11	0.300929	10.1007	3.57325	0.00121332	0.0184501
seq.20161.41	NCAM1	-0.2967	15.5913	-3.57261	0.00121542	0.0184501
seq.4962.52	CDNF	-0.229414	10.6524	-3.56797	0.00123058	0.0186377
seq.2781.63	CCL4L1	0.368105	9.07088	3.5579	0.0012641	0.0190574
seq.23771.17	ATF5	0.278821	9.35065	3.55624	0.00126973	0.0190574
seq.21770.18	B3GAT1	-0.414448	9.34666	-3.55864	0.00126162	0.0190574
seq.7785.1	EFNB3	-0.513399	10.7849	-3.55704	0.00126702	0.0190574
seq.8885.6	CACNA2D3	-0.274046	11.2216	-3.55299	0.00128076	0.0191798
seq.20213.82	HSPA6	-0.571562	11.947	-3.5444	0.00131047	0.0195806
seq.8953.47	HDGF	0.48471	11.0118	3.54159	0.00132031	0.0196835
seq.15319.226	CCNA1	0.145065	9.86444	3.53703	0.00133647	0.0198799
seq.23536.14	None	0.155377	8.32099	3.5349	0.00134405	0.0199039
seq.19372.7	MDGA2	-0.391984	12.0468	-3.53558	0.00134165	0.0199039
seq.4137.57	IL25	0.220198	8.71355	3.52642	0.00137476	0.0203135
seq.4891.50	GCG	0.582063	10.9944	3.52349	0.00138553	0.0204274
seq.6425.87	MMP19	0.505999	13.1075	3.52133	0.00139351	0.0204997
seq.5231.79	PCSK9	0.389362	15.2336	3.51903	0.00140208	0.0205351
seq.25922.7	LRP5	0.289005	11.4946	3.51935	0.00140088	0.0205351
seq.8991.115	FCRL4	-0.255927	10.7657	-3.51809	0.00140559	0.0205414
seq.13681.173	CSNK2A2	0.191681	9.9098	3.51548	0.00141539	0.0206393
seq.25499.37	DDHD2	0.188161	10.8333	3.50096	0.00147106	0.0213111
seq.8390.25	COX7A1	-0.250535	9.98465	-3.50164	0.00146841	0.0213111
seq.15303.63	S100A5	-0.474511	12.1632	-3.50243	0.00146535	0.0213111
seq.16809.1	NME4	-0.870612	13.375	-3.49385	0.0014991	0.0216703
seq.9090.9	SYTL4	0.653094	16.257	3.48601	0.00153064	0.0220629
seq.13574.50	RND1	0.12902	9.03574	3.48464	0.00153619	0.0220629
seq.5020.50	PGK1	-0.526018	12.6212	-3.48509	0.00153437	0.0220629
seq.3057.55	CCN4	-0.378479	12.0505	-3.48358	0.00154051	0.0220773
seq.4498.62	NCAM1	-0.288392	13.5205	-3.46875	0.00160227	0.0229132
seq.8817.29	CENPV	-0.281839	9.54862	-3.46792	0.0016058	0.0229144
seq.5481.16	RASA1	-0.562777	10.2119	-3.46303	0.00162673	0.0231636
seq.19437.61	VEGFA	0.464677	10.1235	3.46048	0.00163776	0.0232214
seq.9296.15	PTPRD	-0.400764	13.5038	-3.46125	0.00163442	0.0232214
seq.2597.8	VEGFA	0.342223	12.7623	3.45796	0.0016487	0.0232774
seq.17816.58	NCALD	-0.472262	12.2593	-3.45856	0.0016461	0.0232774
seq.9211.19	SERPINF1	-0.218874	15.915	-3.45539	0.00165998	0.0233872
seq.2741.22	SIGLEC6	0.222186	9.26558	3.45137	0.0016777	0.023587
seq.22371.46	FAM110A	-0.457653	11.8916	-3.4486	0.00169006	0.0237107
seq.11442.1	DNER	0.362222	10.7355	3.44484	0.0017069	0.0238465
seq.3400.49	TBK1	0.16332	9.04261	3.44518	0.00170538	0.0238465
seq.4150.75	PLG	0.277548	11.0471	3.43765	0.00173966	0.0241874
seq.9341.1	PDGFD	0.221021	12.2514	3.43718	0.00174182	0.0241874
seq.6584.1	HRC	-0.258396	8.1428	-3.4371	0.00174219	0.0241874
seq.21583.14	RPL26L1	0.853686	12.9928	3.43022	0.00177411	0.0245283
seq.19109.32	TCEAL8	-0.269506	9.53886	-3.43039	0.00177335	0.0245283
seq.14205.6	HEXIM2	-0.526518	10.773	-3.42772	0.00178587	0.0245889
seq.14294.61	MBD1	-0.540189	13.0442	-3.42786	0.00178519	0.0245889
seq.5738.25	TNC	0.415297	13.5717	3.42319	0.00180736	0.0247964
seq.20396.70	COMMD6	0.227181	9.96491	3.42297	0.00180838	0.0247964
seq.3067.67	GDF9	0.36158	9.2329	3.42067	0.00181941	0.0248964
seq.5691.2	CRISPLD2	1.62779	9.74061	3.41693	0.00183745	0.0250404
seq.3471.49	STK16	0.469622	11.4665	3.41751	0.00183464	0.0250404
seq.11204.80	CXADR	0.389809	11.4646	3.41217	0.00186062	0.0252529
seq.22492.108	LMO3	0.209496	10.5526	3.41272	0.00185794	0.0252529
seq.7881.244	PARP16	-0.301503	9.81244	-3.40947	0.00187391	0.02533
seq.23340.37	MRI1	-0.353894	10.6669	-3.41012	0.00187071	0.02533
seq.6913.189	HMGB2	0.292597	9.14777	3.40711	0.00188559	0.0253802
seq.5807.77	CD70	0.146691	8.83512	3.40642	0.00188904	0.0253802
seq.21391.17	CGB3	-0.261046	10.7846	-3.40727	0.00188481	0.0253802
seq.7939.1	SLC66A1L	-0.28244	10.2512	-3.40146	0.00191384	0.0256101
seq.25070.18	MICAL1	-0.504355	12.514	-3.40188	0.00191176	0.0256101
seq.13493.5	GRID1	-0.2117	9.38634	-3.40048	0.00191881	0.0256252
seq.2826.53	EDA	0.245211	10.7854	3.39373	0.00195317	0.0260319
seq.14021.81	MED4	-0.171852	10.3212	-3.38944	0.00197534	0.0261704
seq.9765.4	NDE1	-0.249822	10.3802	-3.38971	0.00197394	0.0261704
seq.23408.1	SNX16	-0.341363	10.0427	-3.38985	0.00197323	0.0261704
seq.8780.2	PCDH10	-0.345342	11.9612	-3.3886	0.0019797	0.0261761
seq.19209.6	NFKBIA	-0.440358	9.12874	-3.38563	0.00199522	0.026329
seq.18888.37	FABP12	0.292385	10.5081	3.38412	0.00200315	0.0263293
seq.11342.59	PLXDC2	-0.265842	8.31052	-3.3846	0.00200066	0.0263293
seq.2201.17	COL18A1	0.284902	14.3906	3.38144	0.00201731	0.0264634
seq.2602.2	ANGPT2	0.560602	13.5883	3.38034	0.00202314	0.0264877
seq.11353.143	SMAD2	-0.146587	11.4779	-3.3773	0.00203939	0.0266481
seq.8985.13	SERAC1	-0.20029	11.4001	-3.37277	0.0020638	0.0269142
seq.8864.59	CENPW	-0.289008	10.5827	-3.37106	0.00207307	0.0269736
seq.10464.6	ANTXR1	-0.34082	11.2061	-3.37044	0.00207645	0.0269736
seq.3497.13	IFNA2	0.151115	7.02746	3.36658	0.00209761	0.0271954
seq.8877.22	EVA1C	-0.226365	11.3618	-3.36541	0.00210405	0.027226
seq.12633.3	PTPN9	-0.170444	9.25999	-3.36245	0.00212045	0.0272792
seq.9218.7	FAS	-0.248054	9.26577	-3.36347	0.00211474	0.0272792
seq.6518.85	GHRL	-0.976599	11.7945	-3.36284	0.00211829	0.0272792
seq.21793.4	CEP43	0.365821	12.7419	3.36038	0.00213196	0.0273746
seq.23550.10	KDF1	-0.202596	10.3449	-3.35793	0.00214572	0.0274541
seq.21817.5	MYL9	-0.528686	14.7453	-3.35781	0.00214639	0.0274541
seq.14696.45	TPSB2	0.292448	9.60729	3.3461	0.00221327	0.0282552
seq.6904.14	LRRTM2	0.427767	9.80454	3.34456	0.0022222	0.028315
seq.18914.188	PAFAH2	-0.201375	10.0321	-3.34159	0.00223951	0.028481
seq.21828.6	RPN2	0.250689	12.2826	3.34053	0.00224573	0.0285058
seq.21183.1	DUSP10	-0.193124	8.1721	-3.33924	0.00225335	0.0285277
seq.8364.74	UST	-0.298078	10.7973	-3.33879	0.00225601	0.0285277
seq.17738.7	CRNN	-0.311122	10.5437	-3.33758	0.00226314	0.0285636
seq.10588.39	ST3GAL5	-0.157927	9.15993	-3.33525	0.002277	0.0286842
seq.2632.5	IL12RB1	0.220054	9.9596	3.33171	0.00229814	0.0288959
seq.13439.6	IQCF3	-0.263736	11.4399	-3.3302	0.00230725	0.0289014
seq.10583.1	TMEM108	-0.273298	8.92284	-3.33082	0.00230349	0.0289014
seq.12627.97	ATG7	0.72852	10.5551	3.32804	0.00232033	0.0289564
seq.2704.74	TNFRSF13B	0.23358	10.213	3.32865	0.00231659	0.0289564
seq.20187.10	ITGAV|ITGB3	-0.434902	12.2567	-3.32714	0.0023258	0.0289703
seq.12893.159	IFI16	0.602337	13.7307	3.32417	0.00234392	0.0291306
seq.12483.62	RORB	-0.25573	9.65811	-3.3236	0.00234741	0.0291306
seq.4867.15	VEGFA	0.555714	9.61927	3.3182	0.00238075	0.0292433
seq.6527.1	TRIL	0.25312	11.1392	3.32024	0.0023681	0.0292433
seq.10781.19	CLEC4G	0.210649	12.5189	3.31786	0.00238282	0.0292433
seq.16755.195	GDF3	0.189754	10.8767	3.31795	0.0023823	0.0292433
seq.22816.4	TRIM54	-0.217089	10.4438	-3.32004	0.00236929	0.0292433
seq.22773.69	SDHB	-0.505997	11.7749	-3.31963	0.00237187	0.0292433
seq.13940.19	IFI16	0.761142	13.0665	3.31636	0.00239219	0.0292505
seq.12018.84	TPK1	-0.104282	10.4971	-3.31703	0.002388	0.0292505
seq.22974.25	H2BC21	0.891133	11.3683	3.31273	0.002415	0.0293713
seq.3727.35	PYY	0.415172	10.0919	3.31315	0.00241232	0.0293713
seq.3221.54	SFRP1	0.35875	9.12581	3.31241	0.002417	0.0293713
seq.9802.27	PNPLA2	0.179644	10.6756	3.31198	0.00241969	0.0293713
seq.10039.32	PNP	-0.40588	12.8094	-3.31001	0.00243219	0.0294693
seq.22968.9	GAGE2D	-0.63188	12.3571	-3.30649	0.00245461	0.029687
seq.14036.116	MPDZ	-0.166281	8.20072	-3.30491	0.00246475	0.0297556
seq.21569.49	STK10	0.455906	11.8833	3.29918	0.00250185	0.0299553
seq.6379.62	ADAMTSL2	0.265176	10.1929	3.2983	0.00250759	0.0299553
seq.5121.3	SEMA6B	0.263201	10.9712	3.29819	0.00250826	0.0299553
seq.11601.26	DHX8	0.158464	10.0381	3.30116	0.00248897	0.0299553
seq.16307.22	UNC5D	-0.443022	11.715	-3.2999	0.00249711	0.0299553
seq.5248.68	PPIF	-0.602993	15.9239	-3.29822	0.00250809	0.0299553
seq.19373.3	MYL12A	-0.48356	12.9604	-3.29597	0.00252286	0.0300758
seq.6456.17	PSG6	-0.235422	10.0633	-3.29345	0.00253945	0.0302194
seq.3320.49	IGFBP7	0.277177	15.1885	3.29096	0.00255597	0.0303618
seq.9013.60	NTN1	0.194421	8.9888	3.28555	0.0025922	0.0307374
seq.3499.77	IL17B	0.101499	7.77828	3.28219	0.00261498	0.0308813
seq.9582.93	SUSD1	-0.104664	8.41933	-3.28198	0.00261638	0.0308813
seq.20521.83	CD28	-0.229239	9.28256	-3.28171	0.00261824	0.0308813
seq.21105.23	UNC119B	0.448564	10.2632	3.27882	0.00263797	0.0310591
seq.7268.12	IFNA4	0.191553	10.0601	3.27746	0.00264734	0.0311144
seq.12708.91	L3MBTL2	-0.380118	10.9987	-3.2745	0.00266777	0.0312993
seq.19254.125	GMPR	-0.921246	15.0854	-3.26985	0.00270025	0.0316247
seq.18208.3	CCNB2	0.327131	11.4576	3.26081	0.00276435	0.0322261
seq.24968.10	TIAM2	0.154993	9.71853	3.26057	0.00276611	0.0322261
seq.7748.11	NDUFV2	-0.276093	11.9241	-3.26117	0.00276176	0.0322261
seq.5716.49	CSAG1	-0.144247	8.37329	-3.25713	0.00279085	0.0324576
seq.9991.112	EMILIN3	-0.341926	10.3814	-3.25459	0.00280933	0.0326156
seq.17805.35	SMNDC1	0.570188	9.755	3.24765	0.00286035	0.0331502
seq.12692.56	DOT1L	-0.262674	8.86853	-3.24308	0.00289437	0.0334863
seq.6895.1	TFRC	0.707496	11.7687	3.24158	0.00290568	0.033553
seq.6054.6	NXPH3	0.148012	10.9974	3.24098	0.00291021	0.033553
seq.20398.60	POP7	-0.636525	14.8655	-3.23946	0.00292166	0.0336269
seq.9954.2	NPIPB3	0.272472	11.3065	3.23701	0.00294026	0.033773
seq.24490.16	THAP4	-0.233729	11.1247	-3.23645	0.0029445	0.033773
seq.16300.4	TREM2	0.630215	12.491	3.23218	0.00297725	0.0340316
seq.18183.3	LDLRAP1	-0.55853	15.8943	-3.23257	0.00297427	0.0340316
seq.5822.22	GDNF	0.115214	9.06942	3.2298	0.00299565	0.0341833
seq.8700.325	GALNT11	0.137149	11.1623	3.22891	0.0030025	0.0342029
seq.10907.116	NTM	-0.413776	14.0255	-3.22803	0.00300941	0.034223
seq.15607.56	PKLR	0.512233	12.8589	3.22594	0.00302566	0.0342545
seq.9598.23	CSMD1	-0.20412	10.1428	-3.22572	0.00302739	0.0342545
seq.16312.45	CDH6	-0.258936	10.6386	-3.22564	0.00302803	0.0342545
seq.14237.1	HSPA1A	-0.265372	11.1751	-3.22504	0.00303274	0.0342545
seq.18943.4	PTGR2	0.21223	11.5244	3.22248	0.0030529	0.0344239
seq.20543.19	DEFB127	0.20538	8.82345	3.21973	0.00307467	0.0346108
seq.12801.33	IRF2	0.517529	9.75127	3.21294	0.00312904	0.0347792
seq.3189.61	TMPRSS15	0.182037	8.94092	3.21601	0.0031043	0.0347792
seq.4128.27	CCL24	0.129909	9.32408	3.21506	0.00311194	0.0347792
seq.3494.71	FGF17	0.0894826	8.17808	3.21265	0.00313138	0.0347792
seq.19287.59	DENR	-0.276791	10.661	-3.21401	0.00312042	0.0347792
seq.2989.17	IFNG	-0.321196	11.1057	-3.21458	0.00311578	0.0347792
seq.13654.1	ROCK2	-0.488198	12.3757	-3.21306	0.00312808	0.0347792
seq.23543.92	TRUB1	-0.519464	12.4912	-3.21332	0.00312594	0.0347792
seq.20964.13	RPS14	0.406155	10.4185	3.21026	0.00315076	0.0348781
seq.8298.8	SSMEM1	-0.566888	13.5863	-3.2107	0.00314718	0.0348781
seq.12514.16	METTL1	0.221801	10.4052	3.20904	0.00316071	0.0349303
seq.17391.10	RBM17	0.181944	9.21137	3.20813	0.00316813	0.0349543
seq.13449.25	SF3B4	-0.165639	9.05034	-3.20319	0.00320878	0.0350546
seq.11149.3	TLR1	-0.313366	10.3762	-3.20329	0.0032079	0.0350546
seq.10606.34	TOR1AIP1	-0.421934	12.8738	-3.2057	0.00318809	0.0350546
seq.8841.65	CILP2	-0.503664	12.3715	-3.20409	0.00320131	0.0350546
seq.3714.49	CKB|CKM	-0.65366	10.6982	-3.20485	0.00319503	0.0350546
seq.11568.2	FKBP1B	-0.674429	11.073	-3.20592	0.00318623	0.0350546
seq.9901.28	EGLN1	0.369332	11.7909	3.19996	0.00323563	0.0352901
seq.6267.51	STMN4	0.705785	12.7829	3.1977	0.0032545	0.0353224
seq.22510.6	NFE2L2	0.308988	9.17538	3.19775	0.00325406	0.0353224
seq.3168.8	ADAMTS5	0.106686	8.94896	3.19822	0.00325015	0.0353224
seq.21269.198	EPHX2	-0.168963	8.76453	-3.19657	0.00326398	0.0353677
seq.20237.38	OAT	0.165565	9.62286	3.19534	0.00327433	0.0354223
seq.19125.26	PRKAR2A	-0.103437	9.33023	-3.19271	0.00329666	0.0356061
seq.19193.18	VBP1	-0.217737	11.9243	-3.18913	0.00332713	0.035877
seq.19126.4	RPRD1B	0.176183	11.7652	3.1876	0.00334025	0.0358875
seq.19199.3	POLR2J	-0.187196	9.8519	-3.18714	0.00334426	0.0358875
seq.4154.57	SELP	-0.279422	15.1063	-3.18752	0.003341	0.0358875
seq.19134.66	POLR2K	-0.46818	13.2301	-3.18648	0.00334996	0.0358909
seq.19225.11	BLNK	0.154356	9.32617	3.18392	0.00337208	0.0360148
seq.19196.73	HOPX	-0.224401	11.1647	-3.18389	0.00337233	0.0360148
seq.13726.4	CD80	-0.200953	8.82083	-3.18261	0.00338349	0.0360675
seq.12329.21	RPS6KA1	-0.254764	8.6461	-3.18208	0.0033881	0.0360675
seq.15620.4	NLGN1	0.179338	10.9387	3.18089	0.00339851	0.0361207
seq.15570.99	CR2	-0.659061	14.1667	-3.17667	0.00343552	0.0364559
seq.3302.58	CST7	0.348867	9.59888	3.17402	0.00345903	0.036647
seq.9172.69	MMP8	0.848959	15.7344	3.17002	0.0034948	0.0368234
seq.3152.57	TNFRSF1B	0.22277	11.2062	3.16969	0.00349778	0.0368234
seq.7092.7	PDILT	0.159489	9.92248	3.17076	0.00348815	0.0368234
seq.5701.81	CLEC3B	-0.229378	12.7857	-3.17145	0.00348198	0.0368234
seq.2634.2	IL2RG	-0.453331	12.6289	-3.16771	0.0035156	0.0369526
seq.2828.82	SPINT1	-0.4059	13.0473	-3.16659	0.00352573	0.0370008
seq.17156.72	DCLK1	-0.384767	11.8597	-3.16464	0.0035434	0.0371277
seq.3373.5	GZMH	0.187718	9.17355	3.16369	0.00355211	0.0371605
seq.20593.10	B3GALT5	0.154326	10.9349	3.16139	0.00357308	0.0373214
seq.23581.131	GHRL	0.257146	10.3575	3.15676	0.00361584	0.0376574
seq.10419.1	SCARA5	-0.345755	12.4118	-3.15607	0.00362221	0.0376574
seq.20975.2	RCAN2	-0.381209	8.56408	-3.15657	0.00361761	0.0376574
seq.13503.19	ARL6IP5	0.989846	12.8782	3.15391	0.00364237	0.0378081
seq.11672.17	KIF16B	0.344565	12.4299	3.14632	0.00371393	0.0378437
seq.4886.3	CCL7	0.29938	9.49975	3.14861	0.0036922	0.0378437
seq.21614.2	GEMIN6	0.166946	10.1671	3.14613	0.00371569	0.0378437
seq.8946.38	NR1H4	0.157721	10.1884	3.15049	0.00367442	0.0378437
seq.24921.73	HIRIP3	0.157063	9.62047	3.14869	0.00369139	0.0378437
seq.11338.49	BLK	-0.180224	9.41318	-3.14816	0.00369641	0.0378437
seq.10000.28	CRYBB2	-0.190253	10.0328	-3.14556	0.00372119	0.0378437
seq.20517.1	DSG2	-0.239305	15.5672	-3.15257	0.0036549	0.0378437
seq.5677.15	C2orf66	-0.247827	9.61307	-3.14823	0.00369578	0.0378437
seq.7853.19	SCO1	-0.250187	11.1288	-3.14516	0.00372493	0.0378437
seq.24907.3	PMPCA	-0.290807	11.7316	-3.14512	0.00372531	0.0378437
seq.8830.29	ABRAXAS2	-0.307968	7.62537	-3.14601	0.00371685	0.0378437
seq.20575.82	CLEC9A	-0.348747	9.15347	-3.14585	0.00371837	0.0378437
seq.2670.67	CKM	-0.510227	9.98835	-3.14515	0.0037251	0.0378437
seq.8268.98	HS3ST3A1	0.2082	11.3036	3.14337	0.00374212	0.0379566
seq.14705.1	VEGFD	0.550115	11.1089	3.14203	0.00375495	0.0380289
seq.18830.1	ITLN1	0.427733	11.3911	3.13899	0.00378428	0.0382095
seq.21721.6	CHST10	0.129333	10.4615	3.13949	0.0037794	0.0382095
seq.22146.20	FOSL2	-0.125991	8.99509	-3.13781	0.00379572	0.0382095
seq.12700.9	ACLY	-0.174052	10.7458	-3.13798	0.00379413	0.0382095
seq.6506.54	TMED10	-0.196687	10.6872	-3.13645	0.00380894	0.0382847
seq.7917.17	CPD	0.233887	11.1657	3.13363	0.00383655	0.0385042
seq.19303.64	PET117	0.156084	9.5367	3.13299	0.00384288	0.0385097
seq.19635.69	FGL2	0.344621	10.6509	3.12825	0.00388974	0.0388949
seq.6557.50	LRRC15	-0.422924	12.7637	-3.12792	0.003893	0.0388949
seq.24407.31	KIF3C	0.379211	11.6679	3.12733	0.00389887	0.0388953
seq.4140.3	IL7	0.12825	7.8371	3.12591	0.00391302	0.0389346
seq.22858.3	MAPK6	-0.251857	16.2434	-3.12577	0.00391449	0.0389346
seq.24661.4	MAP6D1	-0.292848	10.1041	-3.12184	0.00395396	0.0392685
seq.10753.31	ADAM7	-0.746428	10.2401	-3.11898	0.00398294	0.0394975
seq.23000.22	NLGN1	-0.189317	8.2696	-3.1175	0.00399808	0.0395887
seq.7189.55	CHST3	0.180617	9.19535	3.11305	0.00404368	0.0399809
seq.3580.25	SERPINA1	0.247152	15.2655	3.11206	0.00405398	0.0400233
seq.6281.51	ST3GAL2	0.371928	11.9428	3.1104	0.00407117	0.0401335
seq.10917.40	GNGT2	0.287313	9.26364	3.10951	0.00408039	0.0401651
seq.4162.54	TF	-0.166941	17.6633	-3.10753	0.00410111	0.0403095
seq.6055.53	IFNAR1	0.415269	13.5034	3.10623	0.00411473	0.0403837
seq.13602.6	SNU13	0.480176	10.831	3.10377	0.00414056	0.0404692
seq.5981.6	None	0.153953	8.11138	3.10367	0.00414166	0.0404692
seq.12822.34	APBB1	-0.201962	11.0223	-3.10458	0.00413203	0.0404692
seq.3132.1	VEGFC	-0.20547	10.5033	-3.09953	0.00418557	0.0408384
seq.22970.8	GIPC1	-0.426338	12.6196	-3.09801	0.00420182	0.040937
seq.8368.102	TNFRSF1B	0.2603	12.9418	3.09539	0.00422994	0.0410908
seq.4851.25	IL1A	-0.164537	9.71271	-3.09569	0.00422672	0.0410908
seq.22566.53	ADCYAP1R1	-0.238189	11.6601	-3.09243	0.00426192	0.0413412
seq.19213.1	SPINK4	0.23988	11.5245	3.08914	0.00429785	0.0416135
seq.10011.65	OCRL	0.174125	11.2583	3.08871	0.00430247	0.0416135
seq.6414.8	OAF	0.264348	12.8934	3.08449	0.00434894	0.0418941
seq.10085.25	STAR	0.191956	10.2654	3.08436	0.00435034	0.0418941
seq.13089.6	HIF1A	-0.245519	9.37602	-3.08493	0.00434404	0.0418941
seq.8357.43	SULT4A1	0.787364	11.2345	3.08051	0.00439323	0.0420036
seq.9950.229	LAG3	0.34184	11.5309	3.08072	0.0043908	0.0420036
seq.9932.49	SEMA4F	-0.245583	10.0213	-3.08202	0.00437636	0.0420036
seq.19127.1	HSPB6	-0.382716	12.5312	-3.08136	0.00438368	0.0420036
seq.4393.3	FGF16	-0.441229	12.0485	-3.08062	0.00439194	0.0420036
seq.3178.5	CTSC	0.173253	9.53122	3.07743	0.00442768	0.0422119
seq.4468.21	SPHK2	-0.124315	9.91173	-3.0776	0.00442583	0.0422119
seq.18413.24	ARL4D	0.238506	8.97034	3.07231	0.00448566	0.0426496
seq.9089.77	JPH3	-0.119024	8.93059	-3.07168	0.0044928	0.0426496
seq.22414.127	TLK1	-0.473836	10.8135	-3.07194	0.00448988	0.0426496
seq.3809.1	FGFR3	0.253223	11.0121	3.07032	0.00450842	0.042737
seq.10534.40	PARP1	0.330622	9.37592	3.06849	0.00452934	0.0428481
seq.24309.14	SYTL2	-0.184177	7.8977	-3.06818	0.004533	0.0428481
seq.18297.8	MRAS	0.241676	10.3276	3.06532	0.00456598	0.0428576
seq.3191.50	WFIKKN1	0.236224	9.45818	3.06676	0.00454937	0.0428576
seq.12394.53	C16orf54	-0.234778	9.002	-3.0653	0.00456616	0.0428576
seq.2952.75	IGF1	-0.506028	14.845	-3.0664	0.00455349	0.0428576
seq.11103.24	HSPB1	-0.527019	12.085	-3.06615	0.00455634	0.0428576
seq.7245.2	CELF2	0.593702	11.8022	3.06403	0.00458097	0.0429361
seq.23537.4	SP6	0.216465	11.4601	3.06253	0.00459835	0.0430385
seq.11816.84	JAK2	-0.416416	14.7932	-3.06194	0.00460529	0.043043
seq.8073.3	CD84	-0.169248	7.51928	-3.06064	0.00462054	0.0431246
seq.6517.14	GDF10	-0.1891	10.9935	-3.06009	0.00462696	0.0431246
seq.17781.191	MAP1LC3A	0.424464	14.3127	3.05623	0.00467247	0.0434546
seq.13427.66	MAN1C1	0.200966	9.66824	3.05457	0.00469221	0.0434546
seq.7197.2	DNAJC15	0.103474	8.59901	3.05518	0.00468493	0.0434546
seq.6565.68	CDCP1	-0.274098	10.4074	-3.05576	0.00467807	0.0434546
seq.9277.16	REG3A	-0.313399	11.7942	-3.05433	0.00469498	0.0434546
seq.2631.50	IL10RB	0.177774	10.6079	3.05308	0.00470984	0.0435317
seq.10382.1	ANGPTL3	0.256799	15.7453	3.05056	0.0047401	0.0437508
seq.3362.61	CHRDL1	0.329783	10.7263	3.04903	0.00475849	0.0437991
seq.19794.10	NUDT14	-0.307214	9.96835	-3.04948	0.004753	0.0437991
seq.3461.58	BCAN	-0.412773	10.804	-3.04654	0.0047885	0.0440146
seq.7131.8	CETP	0.283826	10.3564	3.04534	0.00480308	0.0440878
seq.2970.60	AREG	-0.383091	11.6878	-3.04372	0.0048228	0.0442079
seq.6264.9	CCN1	0.236465	8.43515	3.04257	0.00483688	0.0442761
seq.18405.117	AP1S2	-0.249679	11.3715	-3.03999	0.00486861	0.0445054
seq.2900.53	CCL14	0.472418	12.7366	3.03794	0.00489394	0.0446756
seq.24493.10	MTMR7	-0.237538	11.8636	-3.03676	0.00490857	0.0447479
seq.20562.78	KLRB1	0.243793	9.9184	3.03593	0.0049188	0.0447799
seq.10047.12	NCF2	0.137436	9.32192	3.03323	0.00495252	0.0450254
seq.12424.107	THYN1	0.383428	10.0996	3.0325	0.00496168	0.0450472
seq.6260.14	TNC	0.30275	15.2873	3.0292	0.00500317	0.0451088
seq.6577.64	LAMA4	-0.21437	9.87008	-3.03119	0.00497805	0.0451088
seq.12490.92	LAMTOR3	-0.214585	11.1259	-3.02828	0.00501489	0.0451088
seq.15622.13	OPCML	-0.300623	11.3141	-3.03012	0.00499151	0.0451088
seq.13937.75	CAND1	-0.306943	12.1937	-3.0282	0.00501585	0.0451088
seq.7970.315	ART3	-0.338518	12.4325	-3.02972	0.00499656	0.0451088
seq.3473.78	MPL	-0.458066	8.95345	-3.0307	0.00498422	0.0451088
seq.13994.1	FBL	0.260831	12.2001	3.0245	0.00506292	0.0453083
seq.9783.75	DNAJC11	0.170753	10.4267	3.02467	0.00506073	0.0453083
seq.7070.25	KEL	0.149558	8.97116	3.02432	0.00506523	0.0453083
seq.2962.50	PTHLH	0.144981	10.3938	3.02561	0.00504877	0.0453083
seq.24892.8	SHCBP1L	0.144003	9.16085	3.02326	0.00507876	0.0453685
seq.2987.37	H1-2	1.26924	11.6461	3.02184	0.00509699	0.0454096
seq.3182.38	ENTPD1	0.25595	11.678	3.02208	0.005094	0.0454096
seq.2580.83	MPO	0.671812	14.3571	3.01997	0.00512113	0.0455637
seq.8635.283	ZPBP	0.176516	12.1831	3.01744	0.00515386	0.0457328
seq.18895.54	GSTM4	-1.166	11.3524	-3.01763	0.00515146	0.0457328
seq.6036.78	EPHA10	0.459526	11.9796	3.01209	0.00522394	0.0461816
seq.24981.8	DYNC1LI1	0.244418	10.3262	3.01188	0.00522671	0.0461816
seq.13926.1	RMI1	0.205458	11.23	3.01146	0.00523216	0.0461816
seq.18179.56	SMS	-0.165029	10.3057	-3.01295	0.00521263	0.0461816
seq.14111.15	THBS2	0.233649	9.34159	3.00994	0.00525225	0.0462951
seq.11116.16	C11orf87	0.208969	11.4884	3.00894	0.0052655	0.0462951
seq.18316.75	SEPTIN3	0.175275	10.3296	3.00891	0.00526586	0.0462951
seq.11089.7	IGHA1|IGHA2	0.414029	11.9928	3.008	0.00527796	0.0463403
seq.24316.10	BMT2	-0.262602	9.7389	-3.00671	0.00529523	0.0464308
seq.19281.86	MAFG	0.300491	10.9425	3.00598	0.00530493	0.0464547
seq.4122.12	DDR1	0.223051	8.67696	3.0034	0.00533944	0.0466622
seq.11363.58	AQP4	-0.187145	10.4857	-3.00317	0.00534263	0.0466622
seq.2809.25	ADAMTS4	0.111437	7.72128	3.00143	0.00536607	0.0468057
seq.5487.7	SLAMF7	0.297312	11.0307	3.00019	0.00538278	0.04689
seq.9594.30	SLC30A5	-0.382502	10.8314	-2.99954	0.00539159	0.0469054
seq.21589.80	DPPA4	0.196415	9.26806	2.99476	0.00545687	0.0473415
seq.8976.13	B4GALNT1	-0.129862	9.84752	-2.99431	0.00546303	0.0473415
seq.18300.39	PURB	-0.507386	14.1705	-2.99502	0.00545333	0.0473415
seq.3327.27	NTN4	0.296794	12.4909	2.99043	0.00551662	0.0476201
seq.3042.7	MB	-0.262828	10.0331	-2.99084	0.00551091	0.0476201
seq.23567.37	GNAQ	-0.285107	11.6651	-2.9907	0.00551285	0.0476201
seq.8004.15	GAPDHS	-0.189932	8.59674	-2.98772	0.00555428	0.0478832
seq.13660.76	ANGPT2	0.54816	14.1015	2.98645	0.00557206	0.0479744
seq.11536.9	MYSM1	-0.113353	10.449	-2.98593	0.00557928	0.0479746
seq.3855.56	PRDX1	-0.375002	15.1846	-2.98398	0.00560666	0.0481479
seq.6434.18	AOC2	-0.353611	10.0551	-2.9823	0.00563038	0.0482894
seq.21350.29	LIN28B	0.150959	8.93661	2.98087	0.00565061	0.0484006
seq.21122.3	DBNDD2	0.272257	10.7933	2.98016	0.00566076	0.0484253
seq.22568.7	DSG4	-0.748293	9.92144	-2.97946	0.00567062	0.0484475
seq.10970.3	ART3	-0.357514	10.3761	-2.9787	0.00568142	0.0484775
seq.23282.19	RAB37	-0.287681	8.9567	-2.97761	0.0056971	0.0485492
seq.7655.11	NPPB	1.01792	11.5302	2.97658	0.00571176	0.0486119
seq.12625.138	KLHL7	-0.132577	10.469	-2.97486	0.00573642	0.0486974
seq.25216.8	S100A8	-0.663127	12.086	-2.97527	0.00573059	0.0486974
seq.8002.27	TMPRSS5	-0.226012	9.95157	-2.97233	0.00577294	0.0489356
seq.12554.10	RAD51D	-0.40909	11.3508	-2.9719	0.00577916	0.0489356
seq.3803.10	CST5	0.553793	12.2741	2.96908	0.00582014	0.0492201
seq.7928.183	TPST1	0.401303	12.241	2.96776	0.00583947	0.0493047
seq.22151.48	GSC2	-0.214125	7.82205	-2.96739	0.00584495	0.0493047
seq.3065.65	FGF5	0.242506	9.51652	2.96622	0.00586208	0.0493867
seq.8839.4	MTX2	-0.171966	9.53893	-2.96483	0.00588245	0.0494333
seq.17161.1	DDOST	-0.540151	11.22	-2.96513	0.00587813	0.0494333
seq.8927.6	None	0.208705	10.3389	2.96368	0.00589947	0.0494517
seq.6973.111	IGF2	-0.484315	12.0848	-2.9638	0.00589773	0.0494517
seq.24958.3	RFX5	0.302848	10.7195	2.96119	0.0059364	0.0495044
seq.14616.16	ZNF382	0.245674	6.82709	2.96163	0.00592976	0.0495044
seq.4330.4	KLK3	0.136134	7.8379	2.96086	0.00594126	0.0495044
seq.15610.72	LAP3	-0.48653	11.7156	-2.96075	0.0059429	0.0495044
seq.13629.25	ATG4B	-0.486744	11.4356	-2.96228	0.00592013	0.0495044
seq.17691.1	TPP1	0.230845	10.8022	2.95853	0.00597599	0.0496558
seq.21786.25	CDKL2	-0.190058	12.8128	-2.95901	0.00596883	0.0496558
seq.11171.25	FLNA	-0.400709	11.8416	-2.95698	0.0059992	0.0497866
seq.17795.176	LSM1	-0.258704	10.913	-2.95561	0.00601984	0.0498958
seq.2645.54	PRKCZ	0.282673	11.0101	2.95503	0.00602851	0.0499056

## Sheet: Prot 12+ wk ARFvHealth
somaid	symbol	logFC	AveExpr	t	P.Value	adj.P.Val
seq.14146.92	H3C1	-2.58345	12.3428	-12.8075	7.01435e-14	4.67436e-10
seq.8351.17	PRSS57	1.65461	10.0462	10.4398	1.21189e-11	4.03801e-08
seq.24244.81	RILP	1.61788	10.1345	9.83834	5.01158e-11	1.11324e-07
seq.8989.40	SCUBE1	2.03179	8.98959	9.13379	2.80672e-10	4.676e-07
seq.25048.30	PACSIN2	3.08701	14.3637	8.47116	1.50559e-09	1.67221e-06
seq.25108.6	ATE1	1.27375	11.4743	8.48659	1.44689e-09	1.67221e-06
seq.22383.21	MITF	1.09129	9.16127	7.5682	1.62563e-08	1.35415e-05
seq.14603.51	KIAA0040	0.823714	10.827	7.57973	1.57598e-08	1.35415e-05
seq.12759.47	ILF3	0.72605	10.0151	6.98834	7.88449e-08	5.83803e-05
seq.22985.160	IGFBP2	0.77339	15.015	6.78316	1.3662e-07	8.27666e-05
seq.8660.33	OLFML3	-0.823971	13.3716	-6.78514	1.35871e-07	8.27666e-05
seq.25209.15	FXYD2	0.333483	11.344	6.66117	1.91927e-07	0.000106584
seq.17450.51	HARS1	2.01289	14.7986	6.58634	2.40513e-07	0.000123291
seq.9545.156	GZMK	0.753472	9.86627	6.4582	3.44259e-07	0.000163867
seq.11387.3	ATF6B	1.12158	10.1743	6.41762	3.85778e-07	0.000171389
seq.6527.1	TRIL	0.375691	11.1796	6.38404	4.17474e-07	0.000173878
seq.13552.7	SWAP70	0.806178	11.3789	6.36759	4.43992e-07	0.000174045
seq.2946.52	CFD	0.691912	14.6837	6.24982	6.09618e-07	0.000225694
seq.15403.53	ID2	0.668431	10.3988	6.2196	6.73655e-07	0.000236275
seq.5598.3	GREM2	0.62523	11.7807	6.11998	8.80357e-07	0.000293335
seq.2977.7	EDAR	-0.644239	10.6279	-6.07318	1.01914e-06	0.000323407
seq.13748.4	CCL8	0.361919	8.37091	6.02649	1.15251e-06	0.000349106
seq.21643.8	RPS20	0.615207	10.7234	5.94125	1.48169e-06	0.000379769
seq.8233.2	ITIH5	0.513051	11.5007	5.95219	1.41775e-06	0.000379769
seq.10908.2	GALNT13	-0.284195	10.8292	-5.95353	1.41237e-06	0.000379769
seq.7991.54	IQCF1	-0.44669	10.9124	-5.94913	1.43016e-06	0.000379769
seq.4916.2	IGHD	2.36595	13.1582	5.9263	1.54597e-06	0.000381568
seq.20947.50	DR1	0.577945	11.4279	5.84468	1.92925e-06	0.000458916
seq.7871.16	TMEM132A	0.503091	11.7972	5.83189	1.99708e-06	0.000458916
seq.24659.6	DNAJB13	-0.300768	11.0071	-5.69266	2.97144e-06	0.000660056
seq.22783.40	SPI1	1.77753	10.732	5.61958	3.7034e-06	0.000683721
seq.15542.19	CKMT1A	1.63884	13.7981	5.61263	3.77765e-06	0.000683721
seq.13738.8	INHBA	1.30361	9.54068	5.65567	3.34103e-06	0.000683721
seq.3314.74	GFRA1	0.833165	9.41581	5.67015	3.20583e-06	0.000683721
seq.12400.25	UBE2T	-0.225411	10.2735	-5.57971	4.10397e-06	0.000683721
seq.4973.18	BIRC3	-0.260253	8.76256	-5.61167	3.74549e-06	0.000683721
seq.13392.13	ATP1B1	-0.478325	9.70671	-5.59734	3.94622e-06	0.000683721
seq.8352.26	SIGLEC12	-0.514686	11.4309	-5.58858	4.00499e-06	0.000683721
seq.7638.30	LMAN2	-0.804187	13.8791	-5.58741	4.02524e-06	0.000683721
seq.13933.276	NAB1	-0.843341	13.3397	-5.59882	3.909e-06	0.000683721
seq.5484.63	RPS3A	0.808499	10.4936	5.56019	4.3879e-06	0.000713193
seq.2505.49	GFRA3	0.53396	10.7144	5.5184	4.94434e-06	0.000784501
seq.5675.6	TNC	0.706612	12.685	5.50048	5.1559e-06	0.000799044
seq.21583.14	RPL26L1	0.83947	12.9939	5.42017	6.53161e-06	0.000986757
seq.10054.3	GAN	-0.214549	8.9004	-5.41041	6.66327e-06	0.000986757
seq.22141.59	PFKFB1	1.04446	11.8179	5.39526	7.03043e-06	0.0010185
seq.3336.50	TFPI	0.604168	14.3454	5.3675	7.53486e-06	0.00106835
seq.3070.1	IL2	0.955281	10.7557	5.30156	9.19132e-06	0.00117457
seq.21322.60	GTF2E2	0.687132	9.82634	5.30347	9.14128e-06	0.00117457
seq.19166.15	RPS19	0.53919	13.7628	5.28596	9.51782e-06	0.00117457
seq.11573.3	SRSF6	0.454273	9.53548	5.32094	8.6956e-06	0.00117457
seq.19767.20	CCNE1	0.440672	11.9396	5.30478	9.01822e-06	0.00117457
seq.9786.310	IER3	0.373765	10.8468	5.28693	9.4913e-06	0.00117457
seq.7202.107	SEMA6C	0.35743	8.98846	5.31688	8.79726e-06	0.00117457
seq.4125.52	AGER	1.82029	10.7433	5.21588	1.17446e-05	0.00142302
seq.10045.47	CUL3	0.59981	9.89103	5.19649	1.24146e-05	0.00147734
seq.8469.41	IGFBP2	1.11452	14.0323	5.16462	1.35996e-05	0.00157706
seq.8953.47	HDGF	0.523593	11.0352	5.16092	1.37259e-05	0.00157706
seq.8388.24	SPAST	-0.23845	9.57759	-5.13752	1.45636e-05	0.00161753
seq.19209.6	NFKBIA	-0.534897	9.08222	-5.14526	1.43741e-05	0.00161753
seq.8819.3	IGFBP2	1.01504	13.7688	5.13461	1.48187e-05	0.00161888
seq.13473.55	ITPKA	-0.242825	10.5433	-5.10019	1.62076e-05	0.00174205
seq.18943.4	PTGR2	0.317007	11.6261	5.07331	1.75049e-05	0.00185163
seq.15641.20	TMEFF1	-0.334557	10.9966	-5.06474	1.794e-05	0.001868
seq.6998.106	ASPH	0.697028	11.0851	5.05889	1.84024e-05	0.00188667
seq.3217.74	SERPINE2	0.848499	11.9977	5.04152	1.93396e-05	0.00192356
seq.8280.238	VTN	-0.323381	11.2415	-5.04035	1.92378e-05	0.00192356
seq.9578.263	MANSC4	-0.264997	8.85005	-4.99151	2.21254e-05	0.00216828
seq.13117.232	CHKB	-1.08935	13.4977	-4.97018	2.37143e-05	0.00229032
seq.8697.38	GPC1	-0.377562	11.9967	-4.95796	2.43549e-05	0.00231859
seq.4925.54	MMP13	1.03314	9.80769	4.92307	2.71312e-05	0.00251114
seq.20133.1	MAGEA3	-1.1025	12.2728	-4.92698	2.68296e-05	0.00251114
seq.17820.170	MLF1	-0.541974	12.6474	-4.87529	3.08522e-05	0.00281642
seq.20217.26	LMNB2	0.525902	12.6477	4.86535	3.17421e-05	0.00285331
seq.14049.17	IL7	0.322691	9.39197	4.86238	3.21126e-05	0.00285331
seq.9187.2	HMGN1	0.918145	10.7741	4.82272	3.61307e-05	0.00314091
seq.25414.11	LCE3B	-0.400009	9.83515	-4.82116	3.6292e-05	0.00314091
seq.6497.10	RS1	-0.306898	11.0533	-4.80479	3.77381e-05	0.00322419
seq.22792.21	WARS2	0.465733	11.2052	4.77798	4.08169e-05	0.00344309
seq.7131.207	TNC	0.556944	11.4901	4.77427	4.1484e-05	0.00345561
seq.5939.42	TNFSF12	0.666213	9.59886	4.75045	4.43971e-05	0.00356461
seq.9723.105	MMRN2	0.3002	9.62828	4.74888	4.43474e-05	0.00356461
seq.25124.21	ZBTB7A	0.211075	9.90602	4.74818	4.43586e-05	0.00356461
seq.20076.7	MNDA	1.42719	16.0522	4.72445	4.78105e-05	0.00379297
seq.11103.24	HSPB1	-0.684707	11.9856	-4.70309	5.08084e-05	0.00398338
seq.14098.28	CARS1	1.01076	12.1145	4.67433	5.51423e-05	0.00417577
seq.20913.27	EIF1	0.602308	12.5899	4.67915	5.404e-05	0.00417577
seq.11275.94	LRP1B	0.462119	10.5512	4.6751	5.50227e-05	0.00417577
seq.8942.2	MRPL21	-0.496466	10.9919	-4.65832	5.7713e-05	0.00432134
seq.11568.2	FKBP1B	-0.771787	11.0422	-4.65371	5.84741e-05	0.00432968
seq.8817.29	CENPV	-0.273409	9.55212	-4.6322	6.18353e-05	0.00452825
seq.9233.71	TFPI2	0.460423	9.49683	4.62711	6.30673e-05	0.00456827
seq.3591.51	CDH6	-0.504855	12.0348	-4.61456	6.50193e-05	0.00465902
seq.25907.47	EML2	0.219232	10.8401	4.56712	7.42896e-05	0.00521122
seq.7970.315	ART3	-0.411348	12.4037	-4.56967	7.3752e-05	0.00521122
seq.3520.58	TGFB3	0.227905	8.39392	4.54536	7.90261e-05	0.00548573
seq.3471.49	STK16	0.410626	11.4638	4.52772	8.3086e-05	0.00564985
seq.25413.80	GAGE2B	-0.956548	12.7484	-4.53038	8.29967e-05	0.00564985
seq.2695.25	PECAM1	0.36833	10.8531	4.51779	8.55932e-05	0.00576155
seq.2570.72	IGFBP2	0.990822	12.1757	4.50634	8.88493e-05	0.00592092
seq.24407.31	KIF3C	0.360974	11.6576	4.47727	9.5871e-05	0.00625979
seq.4987.17	FCAR	-0.236623	10.1091	-4.47404	9.67524e-05	0.00625979
seq.4991.12	GPC5	-0.242358	9.64592	-4.47438	9.6658e-05	0.00625979
seq.5033.27	TPM1	-0.269953	11.0487	-4.44864	0.000103972	0.00663676
seq.6584.1	HRC	-0.299528	8.16002	-4.4424	0.00010648	0.00663676
seq.9398.30	GALP	-0.413012	9.45536	-4.44212	0.000106563	0.00663676
seq.21863.11	NUBP2	-0.437577	12.0104	-4.44095	0.000106262	0.00663676
seq.5648.28	CTRB2	-0.771534	8.67331	-4.43356	0.000109175	0.00673649
seq.22082.25	BEX2	-0.161552	9.97083	-4.42478	0.000111239	0.00680088
seq.19335.2	JPT1	-0.957444	13.1091	-4.41763	0.000114203	0.00691861
seq.25265.8	FNBP1	1.31095	11.1631	4.4075	0.000117517	0.00705526
seq.20237.38	OAT	0.282431	9.74126	4.38647	0.000124067	0.00738198
seq.24712.6	GTPBP10	-0.271229	9.29728	-4.3659	0.000131689	0.00776618
seq.8357.43	SULT4A1	0.535456	11.1113	4.34954	0.000138399	0.00809026
seq.21244.57	NPM1	0.543875	12.1254	4.33605	0.000143266	0.00830193
seq.23622.128	INIP	-0.698973	13.2462	-4.31907	0.000150806	0.00866354
seq.8265.225	TMPO	0.485879	13.0838	4.31003	0.000153822	0.0087613
seq.15607.56	PKLR	0.877344	12.9549	4.30897	0.000155157	0.0087624
seq.9259.35	TNFRSF21	0.494775	12.0753	4.30171	0.000157681	0.00883012
seq.21715.40	SENP1	0.264424	8.74914	4.29854	0.000159266	0.00884455
seq.2876.74	TOP1	0.513042	9.66375	4.29619	0.000160836	0.00884676
seq.20568.3	FREM1	0.459802	9.97946	4.29372	0.000161961	0.00884676
seq.11556.19	ARFGAP1	0.243691	10.3567	4.28782	0.000163753	0.00887193
seq.4144.13	CCL13	0.191302	8.49917	4.28414	0.000165459	0.00889209
seq.21802.53	NEIL1	0.441533	14.4526	4.26719	0.000173547	0.00920947
seq.6572.10	LRRTM4	-0.190813	9.98931	-4.266	0.000174129	0.00920947
seq.18403.25	AMPD2	1.7191	10.5962	4.26361	0.000176264	0.009249
seq.8973.23	FCRL4	-0.763842	11.2726	-4.25889	0.00017862	0.00929939
seq.3204.2	LTA4H	0.380159	11.4467	4.24932	0.000182491	0.00942731
seq.21604.2	CUTA	0.283934	10.2406	4.24098	0.000186905	0.00958102
seq.12515.45	UCK2	-0.263049	10.6694	-4.1972	0.000211255	0.0107466
seq.7211.2	RNASE1	0.543812	8.81957	4.19008	0.000216646	0.0108636
seq.8890.9	TMEM132B	0.527921	12.495	4.18792	0.000217098	0.0108636
seq.24721.17	GOLPH3	-0.924476	13.0499	-4.18713	0.000218446	0.0108636
seq.12934.1	HERC5	-0.293957	10.6955	-4.18125	0.00022092	0.0109053
seq.16758.96	HDGF	0.50477	12.8467	4.16217	0.000233051	0.0113563
seq.11116.16	C11orf87	0.314893	11.5448	4.16154	0.000233466	0.0113563
seq.5813.58	EPO	0.627632	9.98091	4.1605	0.000235353	0.0113652
seq.12801.33	IRF2	0.571938	9.77192	4.14768	0.00024394	0.0116951
seq.8931.124	G0S2	-0.226626	9.07944	-4.13355	0.000252597	0.0120236
seq.19602.36	JUND	0.296015	9.36541	4.12742	0.000258145	0.0122006
seq.24493.10	MTMR7	-0.276343	11.8267	-4.11182	0.000268307	0.0125915
seq.12916.3	MTCP1	-0.207894	9.82273	-4.10756	0.000271521	0.0126532
seq.21911.17	NDP	0.39649	9.54572	4.09169	0.000285214	0.0131991
seq.3067.67	GDF9	0.35283	9.22361	4.08899	0.000287368	0.013207
seq.17319.1	SELENOH	0.47466	9.64315	4.08303	0.00029218	0.0133362
seq.10731.10	HS3ST5	-0.301823	11.5431	-4.0661	0.000304818	0.0138184
seq.6491.59	KLK15	-0.284143	10.8127	-4.05545	0.000314006	0.0141388
seq.18830.1	ITLN1	0.407503	11.4007	4.04917	0.000320117	0.0142217
seq.19109.32	TCEAL8	-0.249486	9.54441	-4.05018	0.000319024	0.0142217
seq.10391.1	ANGPTL3	0.353816	10.5407	4.04745	0.000322295	0.0142237
seq.12514.16	METTL1	0.198895	10.3915	4.0277	0.000339227	0.0148724
seq.4886.3	CCL7	0.240191	9.49714	4.01727	0.000349595	0.0152268
seq.8545.14	C17orf78	-0.161724	9.59022	-4.00523	0.000361088	0.0156253
seq.11203.97	PKLR	0.824474	13.462	3.99352	0.000374737	0.0161113
seq.5738.25	TNC	0.459561	13.6241	3.98905	0.000377683	0.0161339
seq.24679.35	ETV7	-0.576167	12.1084	-3.98617	0.000382452	0.0162335
seq.5009.11	MSN	1.13067	12.534	3.97285	0.000396837	0.0166693
seq.9796.4	CEL	1.07462	10.9243	3.97204	0.000397722	0.0166693
seq.10781.19	CLEC4G	0.239904	12.5206	3.9674	0.000401066	0.0166878
seq.9987.30	LRRC25	-0.287593	10.3769	-3.9659	0.000403171	0.0166878
seq.21883.17	BMP5	0.389226	13.4326	3.96203	0.000407084	0.0167457
seq.19286.30	MYL5	0.141193	10.0102	3.9589	0.000410629	0.0167879
seq.12632.14	NAT1	-0.278264	10.9233	-3.94889	0.000422172	0.0171546
seq.12676.1	PACSIN1	1.45631	11.1865	3.92464	0.00045345	0.0183139
seq.25296.3	AMOT	-0.359331	9.96955	-3.91598	0.000464415	0.0186437
seq.4553.65	HDGFL2	0.287071	9.5208	3.90704	0.000476019	0.0189242
seq.8002.27	TMPRSS5	-0.246984	9.91496	-3.9029	0.000479921	0.0189242
seq.7210.25	APLP1	-0.700969	12.0335	-3.90579	0.000477671	0.0189242
seq.2681.23	HGF	0.55901	10.5051	3.88936	0.000499801	0.0191833
seq.6461.54	APOC3	0.532791	11.0007	3.89292	0.000494927	0.0191833
seq.22578.17	ROBO2	0.451464	13.036	3.88705	0.000500884	0.0191833
seq.21793.4	CEP43	0.373839	12.7415	3.89386	0.000491556	0.0191833
seq.12428.2	LYPLAL1	-0.172153	10.3126	-3.88829	0.000499167	0.0191833
seq.2783.18	CCL3L1	0.384233	11.0938	3.88034	0.000512117	0.0195014
seq.7747.47	NDUFB11	-0.602691	12.1908	-3.87846	0.000515047	0.0195016
seq.25276.32	RABL6	0.415078	12.448	3.86752	0.000528588	0.0197904
seq.22844.4	ZSWIM7	-0.532899	9.96005	-3.86902	0.000528616	0.0197904
seq.19242.21	PFDN1	0.261106	10.489	3.86271	0.000535645	0.0199416
seq.18823.52	H2BU1	1.39205	11.2214	3.85129	0.000555035	0.0203135
seq.24708.7	DHRS3	-0.14404	10.0746	-3.84979	0.000555047	0.0203135
seq.24665.48	REM1	-0.187833	9.35883	-3.84797	0.000557828	0.0203135
seq.11565.58	ZNF23	-0.379968	8.89972	-3.85035	0.000556471	0.0203135
seq.8660.5	OLFML3	0.405551	13.5149	3.84486	0.000562619	0.0203766
seq.19183.164	RPL12	0.454249	13.7031	3.83885	0.000572009	0.0206047
seq.25273.80	CALD1	-0.363326	15.945	-3.8104	0.000618519	0.0221603
seq.4428.1	CHST2	0.19389	10.0513	3.79436	0.000646347	0.0229109
seq.8830.29	ABRAXAS2	-0.286782	7.581	-3.79601	0.000645963	0.0229109
seq.15667.39	BMP4	0.404809	10.0644	3.78918	0.00065816	0.0232062
seq.6706.18	ALPG	-0.496314	8.4037	-3.78631	0.000663355	0.0232663
seq.2853.68	CHEK1	0.225277	9.97301	3.78296	0.000666854	0.0232666
seq.19341.36	ACBD6	-0.265583	16.5103	-3.7763	0.000679137	0.0235717
seq.13740.51	FRZB	0.543339	10.759	3.77131	0.000691149	0.023747
seq.2911.27	MDK	0.510116	10.2377	3.77122	0.000691314	0.023747
seq.5440.26	TNNI2	-0.569882	11.5885	-3.76221	0.000708553	0.0242143
seq.20964.13	RPS14	0.555116	10.4329	3.75908	0.000714641	0.0242978
seq.21393.62	AHCY	0.44422	13.171	3.75181	0.0007262	0.0245655
seq.19195.85	RPS5	0.425378	12.3758	3.73366	0.000763126	0.0255551
seq.3427.63	CSNK2A1	0.208857	8.73128	3.73405	0.000762549	0.0255551
seq.5301.7	CCL11	0.51736	12.7327	3.72443	0.000783536	0.0256465
seq.3364.76	CTSV	0.397116	10.3292	3.7292	0.000775369	0.0256465
seq.5465.32	HS6ST1	0.323273	10.3384	3.72505	0.000784194	0.0256465
seq.11327.56	CLK2	0.320537	10.3506	3.72815	0.000777594	0.0256465
seq.19279.42	RBP1	0.230899	10.5404	3.72326	0.000785097	0.0256465
seq.8864.59	CENPW	-0.210961	10.6118	-3.72122	0.000789483	0.025664
seq.5593.11	PDIA5	0.921222	14.7954	3.71321	0.000809903	0.0262
seq.5121.3	SEMA6B	0.321605	10.9805	3.70449	0.000826744	0.0266156
seq.12041.33	HSPA1L	0.306561	9.46963	3.70252	0.000833822	0.0267144
seq.11219.95	FGFBP3	0.953692	10.2282	3.70035	0.000838748	0.0267436
seq.8074.32	TMEM70	0.665339	8.81851	3.69386	0.000853685	0.0270903
seq.9751.72	YBX1	0.524573	11.7255	3.68298	0.000879314	0.0272546
seq.20141.42	TCEA2	0.407578	9.21399	3.68321	0.000878769	0.0272546
seq.2635.61	LAYN	0.329797	11.3802	3.6818	0.000879232	0.0272546
seq.3736.60	BMP6	0.229495	10.6642	3.68226	0.000877861	0.0272546
seq.22128.8	ELK4	0.150661	9.60557	3.68417	0.000873319	0.0272546
seq.20593.10	B3GALT5	0.170481	10.9381	3.67786	0.000888428	0.0274097
seq.10012.5	SPDEF	0.248915	11.1856	3.67205	0.000902575	0.0276573
seq.9089.77	JPH3	-0.112321	8.9255	-3.67116	0.000904757	0.0276573
seq.6260.14	TNC	0.39007	15.3374	3.66779	0.000913078	0.027658
seq.6913.189	HMGB2	0.337114	9.21602	3.67074	0.000909034	0.027658
seq.24309.14	SYTL2	-0.212942	7.84881	-3.66515	0.000920106	0.0277447
seq.3488.64	CAT	0.602371	14.9646	3.62917	0.00101743	0.0296077
seq.23290.3	SMN1	0.541182	12.156	3.6404	0.000986968	0.0296077
seq.19158.1	PCLAF	0.440571	11.7416	3.6297	0.00101528	0.0296077
seq.11204.80	CXADR	0.433825	11.5116	3.63506	0.00100135	0.0296077
seq.24958.3	RFX5	0.35372	10.7326	3.6364	0.000997736	0.0296077
seq.12585.39	ERCC1	-0.112704	9.0927	-3.62979	0.00101222	0.0296077
seq.8624.16	UNC5D	-0.214994	8.94411	-3.63148	0.00100844	0.0296077
seq.22136.9	EXOG	-0.258273	8.25798	-3.62918	0.00101741	0.0296077
seq.3065.65	FGF5	0.252512	9.52376	3.62712	0.00102309	0.0296429
seq.3587.53	BMP10	0.370745	11.0855	3.61423	0.00105938	0.0301278
seq.6372.7	YBX2	0.362431	14.3792	3.61746	0.00104659	0.0301278
seq.2949.6	PLA2G10	0.303976	10.2714	3.61167	0.00106674	0.0301278
seq.24981.8	DYNC1LI1	0.29924	10.355	3.61003	0.00107147	0.0301278
seq.23771.17	ATF5	0.244134	9.35145	3.61351	0.00106145	0.0301278
seq.13412.5	WFDC6	-0.129334	8.08544	-3.60881	0.00107135	0.0301278
seq.23210.4	ETV2	-0.313626	10.1368	-3.61689	0.00105181	0.0301278
seq.22403.13	H2BC12	1.01576	9.56325	3.60691	0.00108055	0.0302227
seq.12701.1	EIF1B	0.827129	14.0438	3.60294	0.00109219	0.0302227
seq.25211.14	GNG12	0.39037	9.05784	3.60267	0.00109299	0.0302227
seq.5618.50	FAM3B	-0.505378	11.6678	-3.60447	0.00108769	0.0302227
seq.19197.95	ACAT1	0.754562	12.5709	3.59275	0.00112264	0.030607
seq.23020.18	RGS4	0.320751	10.3119	3.59189	0.00112526	0.030607
seq.2704.74	TNFRSF13B	0.212459	10.2108	3.59229	0.00112027	0.030607
seq.6456.17	PSG6	-0.232234	10.0581	-3.59426	0.00111521	0.030607
seq.11263.57	CASQ1	-0.275046	12.9269	-3.58626	0.00113866	0.0308457
seq.7799.3	KIR2DL5A	-0.12515	9.60424	-3.58319	0.00114813	0.0309764
seq.9114.84	UMODL1	-0.234736	9.81131	-3.57806	0.00116504	0.0313058
seq.14072.9	TPT1	-0.449193	12.4095	-3.57645	0.00117011	0.0313157
seq.19115.13	CMBL	-0.222263	9.35243	-3.57185	0.00118545	0.0315994
seq.2631.50	IL10RB	0.156743	10.5987	3.56757	0.00119751	0.0317131
seq.6973.111	IGF2	-0.381234	12.1128	-3.56704	0.00119924	0.0317131
seq.20173.39	CAPN9	0.229409	11.0764	3.56093	0.00121911	0.0320137
seq.11266.8	SELPLG	-0.496994	11.8808	-3.56182	0.00122021	0.0320137
seq.23422.47	RFC4	0.19522	9.86391	3.54935	0.00125773	0.0328686
seq.13681.173	CSNK2A2	0.161674	9.89579	3.54302	0.00127934	0.0333027
seq.9004.24	LDLRAD4	0.511205	9.98756	3.5393	0.00129633	0.0334258
seq.7962.11	SPINK8	-0.271248	9.50588	-3.54097	0.00129054	0.0334258
seq.3363.31	CSK	-0.391299	17.4333	-3.53731	0.00129911	0.0334258
seq.4122.12	DDR1	0.296043	8.75382	3.52986	0.00132962	0.0340791
seq.13022.20	TP53I11	0.797726	11.1535	3.51934	0.00136767	0.034787
seq.8364.74	UST	-0.323074	10.8224	-3.51971	0.00136532	0.034787
seq.25275.30	HDAC4	0.227869	9.17528	3.50869	0.00140669	0.0356433
seq.2891.1	CD22	0.223065	10.9751	3.50418	0.0014199	0.0358418
seq.2514.65	EFNB3	0.319163	10.3663	3.49763	0.00144955	0.036452
seq.19563.3	SEZ6L	-0.315295	12.6145	-3.49333	0.00146176	0.036621
seq.14057.68	TNFSF15	-0.264498	11.3232	-3.4917	0.00146818	0.036644
seq.3322.52	LRIG3	0.557102	12.6622	3.48792	0.00148766	0.0369917
seq.9218.7	FAS	-0.202879	9.28084	-3.48412	0.00149935	0.0370062
seq.13236.25	WNT3A	-0.465778	12.4365	-3.48594	0.00149405	0.0370062
seq.16773.29	SCUBE3	0.504848	8.13726	3.47847	0.0015257	0.0375175
seq.9954.2	NPIPB3	0.245456	11.2982	3.47177	0.00154853	0.0379389
seq.23322.2	MSC	0.379056	12.8431	3.4622	0.00158864	0.038586
seq.3401.8	PTPN2	0.128167	9.14136	3.46279	0.00158613	0.038586
seq.5716.49	CSAG1	-0.120702	8.37784	-3.46133	0.00159231	0.038586
seq.18888.37	FABP12	0.294037	10.486	3.45853	0.00160909	0.0388513
seq.19154.41	SERPINE2	1.14211	13.7045	3.45448	0.00162653	0.0390413
seq.23621.326	TIMM13	0.235242	11.123	3.45152	0.00163453	0.0390413
seq.12798.46	SLC4A8	-0.271702	9.51588	-3.45336	0.00163139	0.0390413
seq.22968.9	GAGE2D	-0.700207	12.3389	-3.45111	0.0016412	0.0390606
seq.22492.108	LMO3	0.194413	10.5429	3.44494	0.00166346	0.0394495
seq.11135.5	MRPL55	0.504281	8.966	3.44433	0.00167112	0.0394906
seq.8389.8	LRRC74A	0.298716	11.9547	3.43975	0.00168662	0.0395763
seq.22533.95	PPP1R10	0.273904	11.3362	3.43986	0.00168613	0.0395763
seq.6255.74	CPXM1	1.13365	12.3826	3.43645	0.00170653	0.0399028
seq.22402.12	H2AC1	1.0667	11.0867	3.41308	0.00181588	0.0408818
seq.18821.9	C4A|C4B	0.761018	12.5822	3.4187	0.00178898	0.0408818
seq.3864.5	RPS7	0.460981	9.89765	3.4137	0.00181287	0.0408818
seq.24279.30	UTP6	-0.176102	11.0304	-3.41849	0.0017848	0.0408818
seq.3630.27	CADM3	-0.230924	10.5416	-3.42411	0.00175833	0.0408818
seq.22005.8	PDP1	-0.268307	10.7015	-3.42222	0.00176798	0.0408818
seq.21540.73	BIN2	-0.369239	17.0277	-3.41227	0.00181455	0.0408818
seq.17744.31	RAB11A	-0.445074	15.8021	-3.41758	0.00179035	0.0408818
seq.6064.4	ERP44	-0.549503	14.5216	-3.41482	0.00180751	0.0408818
seq.25070.18	MICAL1	-0.606916	12.4492	-3.42344	0.00176661	0.0408818
seq.12817.1	GEM	-0.726729	12.3776	-3.41764	0.00179405	0.0408818
seq.24684.7	GIMAP4	0.380639	11.5567	3.4103	0.00182565	0.0409635
seq.7242.14	VSTM4	0.311875	10.8356	3.40325	0.00186352	0.0416727
seq.12483.62	RORB	-0.195637	9.65909	-3.39809	0.00188417	0.0419936
seq.11672.17	KIF16B	0.323249	12.4134	3.39504	0.00189946	0.0421933
seq.5733.61	IFNA10	-0.262002	11.0381	-3.39024	0.00192379	0.0425919
seq.14143.8	H2BC21	1.06978	12.8818	3.3799	0.00198278	0.0436496
seq.2603.61	CD80	0.129773	10.1751	3.37848	0.00198467	0.0436496
seq.23340.37	MRI1	-0.272362	10.6807	-3.35707	0.00210165	0.0459193
seq.7785.1	EFNB3	-0.472565	10.73	-3.35802	0.0021008	0.0459193
seq.4924.32	MMP1	0.698189	14.7935	3.355	0.00211764	0.0461175
seq.3831.21	PTEN	0.941718	9.72114	3.3515	0.00213726	0.0463932
seq.9901.28	EGLN1	0.29581	11.7719	3.34039	0.00219482	0.0473343
seq.10464.6	ANTXR1	-0.330115	11.2181	-3.34131	0.00219207	0.0473343
seq.23006.19	PIP4K2B	0.774165	10.4401	3.34018	0.00220199	0.0473357
seq.14094.29	HBEGF	1.65649	10.0587	3.33287	0.00224482	0.0474082
seq.13503.19	ARL6IP5	1.14399	12.9616	3.33692	0.002221	0.0474082
seq.10011.65	OCRL	0.190044	11.2662	3.33389	0.00223278	0.0474082
seq.4163.5	H2AZ1	0.132989	9.60162	3.3313	0.00224805	0.0474082
seq.12835.101	PYDC1	-0.120262	8.90416	-3.33318	0.00223697	0.0474082
seq.8839.4	MTX2	-0.173267	9.54085	-3.33698	0.00221468	0.0474082
seq.21387.64	MEP1A	0.800883	13.5363	3.32412	0.00229715	0.0476637
seq.11530.37	HMBS	0.796499	14.734	3.3267	0.00228157	0.0476637
seq.9756.6	TAGLN	0.334725	10.2663	3.32542	0.00228929	0.0476637
seq.13984.23	DDX25	-0.0899645	9.37677	-3.32144	0.00230723	0.0476637
seq.4785.30	SERPINA6	-0.103797	8.91442	-3.32517	0.00228469	0.0476637
seq.18294.26	SOX2	-0.120094	8.37433	-3.32646	0.00227693	0.0476637
seq.7856.51	FAM151A	-0.222418	10.6563	-3.31977	0.00231738	0.0476637
seq.8390.25	COX7A1	-0.245911	10.0012	-3.32159	0.0023121	0.0476637
seq.23243.120	RPS25	0.382841	13.9537	3.31508	0.00234618	0.0477599
seq.4280.47	PSMA2	0.307058	9.50488	3.31553	0.0023496	0.0477599
seq.7141.21	MGAT4B	0.299478	12.0003	3.31434	0.00235073	0.0477599
seq.19303.64	PET117	0.172699	9.57382	3.31551	0.00234349	0.0477599
seq.9090.9	SYTL4	0.624728	16.1749	3.30832	0.00239452	0.0485017
seq.7246.4	FREM2	0.119466	9.03757	3.30446	0.00241262	0.0487203
seq.10714.7	ACE	0.411562	9.69377	3.29575	0.00247486	0.049527
seq.4551.72	ADGRG5	0.32163	9.76256	3.29627	0.00247146	0.049527
seq.10970.3	ART3	-0.38519	10.3386	-3.29795	0.00246059	0.049527
seq.3628.3	MAP2K2	0.461858	11.6146	3.29417	0.00248516	0.0495841
seq.6390.18	NPS	-0.266815	13.2465	-3.29119	0.00249812	0.0496938
seq.7251.64	C1QTNF3	0.325397	10.4031	3.28934	0.00251678	0.049768
seq.21589.80	DPPA4	0.191931	9.27558	3.28904	0.00251383	0.049768
seq.13439.6	IQCF3	-0.231835	11.4526	-3.28721	0.00252437	0.0497704

## Sheet: Prot trend ARFvHealthy
somaid	symbol	logFC	AveExpr	t	P.Value	adj.P.Val
seq.4811.33	ITIH4	-0.407361	15.1218	-6.34458	4.27317e-08	0.000131924
seq.8289.8	GPNMB	0.325836	9.90854	6.33878	4.38142e-08	0.000131924
seq.13114.50	LUM	0.422821	12.7737	6.25706	5.93894e-08	0.000131924
seq.5624.66	FOLR3	-0.183795	9.38996	-5.93869	1.956e-07	0.000325869
seq.11215.6	CDH15	-0.521763	11.886	-5.81123	3.14469e-07	0.000401209
seq.3299.29	CNTN5	0.327913	9.42982	5.75581	3.88724e-07	0.000401209
seq.19223.6	RAB1A	0.529413	14.7139	5.73213	4.21438e-07	0.000401209
seq.23620.16	RCSD1	0.669825	10.6469	5.64317	5.89758e-07	0.000491269
seq.9235.3	PLXDC1	-0.464737	13.835	-5.60176	6.82161e-07	0.000505102
seq.6451.64	ASPN	0.475319	12.8326	5.46552	1.12539e-06	0.000749962
seq.3613.62	FCN1	-0.421387	12.9924	-5.40141	1.42288e-06	0.000838499
seq.20087.3	SELENOF	0.364041	13.2594	5.38515	1.5099e-06	0.000838499
seq.6583.67	SERPINA10	-0.337097	14.5724	-5.19998	2.95899e-06	0.00104804
seq.13722.105	C9	-0.33334	16.0336	-5.22294	2.7231e-06	0.00104804
seq.5627.53	GNRH1	-0.313387	10.8825	-5.22885	2.66557e-06	0.00104804
seq.4878.3	F10	-0.287895	12.3331	-5.227	2.68341e-06	0.00104804
seq.11465.4	GPR135	-0.18492	9.0935	-5.22496	2.70331e-06	0.00104804
seq.10464.6	ANTXR1	0.442466	10.8388	5.19883	2.9881e-06	0.00104804
seq.6406.3	NMES1	0.495177	12.1191	5.28274	2.19268e-06	0.00104804
seq.6433.57	FAM20A	-0.33517	10.9397	-5.13663	3.71986e-06	0.00123946
seq.23426.1	VCX	-0.272946	14.1311	-5.04874	5.10055e-06	0.00161274
seq.24499.36	LGSN	-0.180832	10.6153	-5.02435	5.56617e-06	0.00161274
seq.5701.81	CLEC3B	0.291534	12.5615	5.02447	5.56385e-06	0.00161274
seq.3077.66	F10	-0.287065	12.2087	-4.98599	6.38438e-06	0.00174664
seq.12535.2	XRCC1	-0.260101	9.25603	-4.9794	6.5525e-06	0.00174664
seq.9453.12	VEGFB	-0.148288	10.6358	-4.93288	7.71491e-06	0.00197739
seq.5803.24	C3	-0.454365	13.1065	-4.88458	9.15918e-06	0.00220367
seq.23148.100	LIPG	-0.440086	10.9666	-4.87966	9.36365e-06	0.00220367
seq.11140.56	COL1A1	0.713944	12.8356	4.87277	9.5898e-06	0.00220367
seq.8900.28	NEO1	0.317046	12.2697	4.85684	1.0105e-05	0.00224466
seq.15559.5	ANTXR2	0.698198	12.5321	4.82977	1.11709e-05	0.00240138
seq.24909.40	PLCD1	0.472956	12.1372	4.76687	1.38937e-05	0.00267818
seq.19601.15	ASB9	0.526634	12.5323	4.7634	1.40661e-05	0.00267818
seq.20561.15	CNTN6	0.562796	11.0841	4.77379	1.36066e-05	0.00267818
seq.15569.15	COL2A1	0.58904	10.8958	4.76722	1.39243e-05	0.00267818
seq.3041.55	MRC2	0.519081	12.4689	4.75091	1.46956e-05	0.00272033
seq.2851.63	C5	-0.446892	13.4835	-4.71923	1.64089e-05	0.00295538
seq.20512.2	MCAM	0.330654	10.6507	4.6529	2.07413e-05	0.00363736
seq.13659.36	ATP13A1	-0.3379	15.0703	-4.6194	2.32522e-05	0.00397315
seq.21547.6	FAM20C	-0.24275	12.1881	-4.60398	2.45326e-05	0.00398927
seq.21154.8	CAB39L	0.46852	12.084	4.60422	2.45439e-05	0.00398927
seq.10521.10	MXRA8	0.33785	9.22147	4.59657	2.52702e-05	0.00400953
seq.19158.1	PCLAF	-0.305334	12.1271	-4.56017	2.85573e-05	0.00442571
seq.20549.1	IZUMO4	-1.37678	9.25385	-4.55446	2.92371e-05	0.0044281
seq.18942.11	PSMB9	0.279159	10.859	4.51983	3.28335e-05	0.00486227
seq.8982.65	THBS3	0.548167	13.5215	4.50751	3.42586e-05	0.00496303
seq.20442.12	RCAN3	-0.327964	12.5368	-4.49501	3.57609e-05	0.00496481
seq.19372.7	MDGA2	0.472536	11.7188	4.49695	3.56029e-05	0.00496481
seq.5631.83	MLN	-0.530074	11.3634	-4.46261	4.01156e-05	0.00545573
seq.9834.62	ADH1B	-0.163193	9.16259	-4.43636	4.37383e-05	0.00561979
seq.24226.30	FSCN1	0.275265	14.2341	4.43705	4.36357e-05	0.00561979
seq.7251.64	C1QTNF3	0.289082	10.4034	4.43612	4.38519e-05	0.00561979
seq.6557.50	LRRC15	0.709526	12.2176	4.38649	5.20392e-05	0.00654319
seq.4129.72	CFB	-0.199784	15.2009	-4.33365	6.20732e-05	0.0076603
seq.10571.14	MGAT1	-0.305263	9.07656	-4.23799	8.60003e-05	0.0104201
seq.2683.1	C3	-0.407152	14.2048	-4.23057	8.79065e-05	0.0104609
seq.21999.61	NUCB2	-0.0962514	9.91755	-4.20324	9.63442e-05	0.0112638
seq.18309.18	CS	0.67863	15.9574	4.19807	9.83154e-05	0.0112961
seq.25486.38	MRPL38	0.263062	9.22185	4.18878	0.000101417	0.0114549
seq.13119.26	SERPINA10	-0.334126	12.7822	-4.1782	0.000104762	0.0116355
seq.5843.60	EHMT2	0.238581	10.0765	4.1695	0.000108003	0.0116466
seq.3340.53	THBS4	0.482355	14.5463	4.16812	0.000108357	0.0116466
seq.5116.62	ROBO2	0.324942	11.2754	4.16168	0.000110775	0.0116466
seq.12595.11	TMOD1	0.371935	10.9819	4.15938	0.000111852	0.0116466
seq.5465.32	HS6ST1	-0.214267	10.5948	-4.13005	0.000122994	0.0122522
seq.3739.72	ITGA2B|ITGB3	0.632908	14.8733	4.13035	0.000123184	0.0122522
seq.18875.125	COL2A1	0.985193	14.3051	4.13605	0.0001209	0.0122522
seq.3580.25	SERPINA1	-0.413191	15.5399	-4.11629	0.000128742	0.0124338
seq.4929.55	SHBG	0.527983	12.7646	4.11738	0.000128438	0.0124338
seq.11615.16	DAPP1	0.69337	15.7498	4.04839	0.000161571	0.0153816
seq.15594.47	HTRA1	-0.477997	14.4348	-4.0373	0.000167157	0.0156892
seq.8597.1	TMEM9	-0.290667	10.8885	-4.03262	0.000169928	0.0157278
seq.17816.58	NCALD	0.282504	11.9819	4.02662	0.000173114	0.0158032
seq.3518.54	CPB2	-0.199543	14.4154	-4.01389	0.000180506	0.0162553
seq.18397.5	AKR1C4	-0.868621	9.20773	-4.00563	0.000185932	0.0165207
seq.20159.1	NRN1L	-0.400239	10.6789	-3.98598	0.000198279	0.0173859
seq.14116.129	S100A4	0.319628	10.698	3.98059	0.000201804	0.0174652
seq.3336.50	TFPI	-0.264446	14.766	-3.97364	0.000205931	0.0175939
seq.12444.39	NR5A2	-0.130983	9.18977	-3.95884	0.000216122	0.018003
seq.20528.23	CD68	0.178565	11.4222	3.95956	0.000215612	0.018003
seq.10663.42	INSIG1	-0.1824	8.91443	-3.95398	0.000219764	0.0180804
seq.12617.2	STK24	0.634459	15.3902	3.92943	0.000238394	0.0193739
seq.2977.7	EDAR	0.305785	10.1479	3.9165	0.000248616	0.0199611
seq.5029.3	FAP	0.552351	10.4981	3.89196	0.000269169	0.0213541
seq.7192.37	IFNLR1	-0.219654	9.83786	-3.88438	0.00027559	0.0215533
seq.5248.68	PPIF	0.881319	15.2548	3.88181	0.000278148	0.0215533
seq.7197.2	DNAJC15	-0.134428	8.69882	-3.8718	0.000286625	0.0219548
seq.17447.52	SFRP4	0.511566	13.1512	3.86164	0.000296463	0.0224504
seq.12649.80	MDH2	0.546398	16.4663	3.85718	0.00030106	0.0225423
seq.20534.6	SCARB1	-0.473807	10.9036	-3.83557	0.000322797	0.023127
seq.6584.1	HRC	-0.185568	8.12969	-3.84309	0.000314706	0.023127
seq.2942.50	CYCS	0.209393	10.944	3.8316	0.000326221	0.023127
seq.7909.37	SHBG	0.325129	15.9339	3.83693	0.000320684	0.023127
seq.21540.73	BIN2	0.463006	16.6338	3.83769	0.000320176	0.023127
seq.12861.13	TMOD3	0.466356	15.8796	3.82686	0.000331453	0.0232506
seq.2644.11	PRKCA	0.91123	14.8321	3.82115	0.000338081	0.0234685
seq.6462.12	TIMP4	-0.336354	11.1597	-3.8151	0.000344575	0.0236727
seq.5452.71	ASGR1	-0.276206	11.4662	-3.80242	0.000358207	0.0243581
seq.12707.26	DPYSL3	0.252546	10.9893	3.79865	0.000362578	0.0244063
seq.3298.52	CNTN4	0.299586	12.8668	3.77771	0.000387625	0.0258313
seq.14337.1	TRAPPC3	-0.268506	10.485	-3.76305	0.0004069	0.0265841
seq.8569.147	ARL8B	0.099365	10.0067	3.76548	0.000403028	0.0265841
seq.2607.54	CRLF1|CLCF1	-0.116003	9.2713	-3.75865	0.00041188	0.0266483
seq.8974.172	COL15A1	0.387153	12.8322	3.75243	0.000420101	0.0269188
seq.7905.30	HP	-2.70464	14.0322	-3.71711	0.000470834	0.0270645
seq.9250.87	DEFA1	-0.539833	12.3856	-3.73681	0.000442357	0.0270645
seq.17505.125	NAALADL1	-0.247476	11.0266	-3.71672	0.000470508	0.0270645
seq.8220.15	FAM241B	-0.231019	13.4055	-3.7263	0.000456428	0.0270645
seq.5749.53	CLPS	-0.219291	8.41847	-3.71896	0.000468081	0.0270645
seq.9543.131	COG8	-0.101078	9.17467	-3.73108	0.000449559	0.0270645
seq.10015.119	KCNAB2	0.136269	9.97391	3.71629	0.000471111	0.0270645
seq.22553.4	RPL38	0.14172	8.99438	3.74562	0.0004293	0.0270645
seq.4138.25	IL20	0.209418	8.90541	3.71894	0.000468117	0.0270645
seq.8956.96	SCARF2	0.255043	10.4946	3.74133	0.00043575	0.0270645
seq.8043.153	COMP	0.375245	9.91552	3.71853	0.000468713	0.0270645
seq.13993.20	EPB41L1	0.63797	13.5524	3.72543	0.000458592	0.0270645
seq.18832.65	SAA2	-1.51836	12.0452	-3.70371	0.000491195	0.0279771
seq.3473.78	MPL	0.287558	8.67055	3.69943	0.000497868	0.0281169
seq.3204.2	LTA4H	-0.274765	11.887	-3.69034	0.000511343	0.0283076
seq.3847.56	ETHE1	-0.197366	10.6201	-3.68609	0.000518236	0.0283076
seq.9828.86	LDHC	-0.135627	9.40498	-3.68827	0.000514699	0.0283076
seq.13512.28	HNRNPR	-0.0659188	10	-3.68789	0.000515321	0.0283076
seq.23915.18	RAB7A	0.398211	15.7637	3.68244	0.000524239	0.0284027
seq.15446.25	NRG1	-0.213629	12.1815	-3.66713	0.000550096	0.0288255
seq.9234.8	TWSG1	0.106898	10.4127	3.67059	0.000544144	0.0288255
seq.8958.51	CHL1	0.161135	12.3639	3.66507	0.00055367	0.0288255
seq.5688.65	CBLN4	0.411902	11.3939	3.67005	0.000546122	0.0288255
seq.20999.12	RPL5	0.496818	13.0656	3.6746	0.000537834	0.0288255
seq.4337.49	CRP	-1.06329	15.2644	-3.65686	0.000569205	0.0291783
seq.9789.52	SYNE2	0.601837	12.4514	3.65857	0.000566154	0.0291783
seq.9526.3	CLPSL1	-0.445227	9.42144	-3.65341	0.000575398	0.0292706
seq.23640.10	EHD2	0.376308	13.5385	3.64905	0.000582226	0.0293936
seq.17678.28	VSIG4	-0.51337	12.2575	-3.64387	0.000592855	0.0297052
seq.21604.2	CUTA	-0.189753	10.4906	-3.62944	0.000619084	0.0307007
seq.14061.48	TNFSF11	-0.175863	10.7698	-3.62747	0.000622908	0.0307007
seq.12940.35	ALDH3B1	0.296726	10.2554	3.62619	0.000626545	0.0307007
seq.19482.11	HDHD3	0.204338	11.8249	3.61903	0.00063955	0.0307977
seq.4706.17	EPB41	0.682434	12.9776	3.61914	0.000640496	0.0307977
seq.25115.21	FHOD1	0.692034	15.86	3.61819	0.000642389	0.0307977
seq.9764.79	HNRNPF	0.358432	15.6653	3.60862	0.000660662	0.0314475
seq.5532.53	FGFR1	0.216247	9.58409	3.60529	0.000668737	0.0316061
seq.21247.16	MAT1A	-0.506441	8.68602	-3.59798	0.000684134	0.0318816
seq.8780.2	PCDH10	0.360298	11.6384	3.59783	0.000684118	0.0318816
seq.2692.74	PLA2G2A	-1.22689	11.8976	-3.59573	0.000688948	0.031883
seq.24955.116	ZHX2	0.180582	8.49677	3.58567	0.000710332	0.0326459
seq.19574.5	ITGA2B|ITGB3	0.629335	13.7472	3.5814	0.000720296	0.0328771
seq.2913.1	CCL23	-0.493352	10.361	-3.57887	0.000725987	0.0329114
seq.5201.50	PDE9A	-0.151059	8.43715	-3.57338	0.000737241	0.032973
seq.17737.7	IVD	0.86004	13.6784	3.57543	0.000733767	0.032973
seq.13700.10	ANXA2	0.366889	13.9698	3.57094	0.000742744	0.0329977
seq.9077.10	MAN1A2	-0.163575	12.254	-3.55692	0.000775714	0.0340089
seq.12873.11	SPN	-0.125682	9.77863	-3.55887	0.000771041	0.0340089
seq.25926.29	LDB1	-0.0868118	9.70985	-3.5428	0.000810321	0.0347134
seq.10977.55	UCMA	0.184865	11.0023	3.53955	0.000818493	0.0347134
seq.9765.4	NDE1	0.189433	10.2486	3.53935	0.000819234	0.0347134
seq.18819.21	PPIC	0.27841	13.465	3.54125	0.000814223	0.0347134
seq.3457.57	POSTN	0.344955	11.738	3.53953	0.000819158	0.0347134
seq.5475.10	PRKCB	0.681032	15.8472	3.53831	0.000823037	0.0347134
seq.3363.31	CSK	0.379628	17.0891	3.52895	0.000845754	0.0354472
seq.13717.15	FCN2	-0.405053	14.6373	-3.52065	0.000867615	0.035513
seq.9829.91	SULT2A1	-0.231504	6.86021	-3.52305	0.000862647	0.035513
seq.23596.17	CCDC89	-0.212614	9.12586	-3.52529	0.000856709	0.035513
seq.10064.12	RBBP9	-0.0894747	10.3341	-3.52026	0.000868639	0.035513
seq.13565.2	RBL2	-0.50418	10.7637	-3.51202	0.000892395	0.0356103
seq.13427.66	MAN1C1	-0.230617	9.84653	-3.51268	0.000890604	0.0356103
seq.12549.33	HPGDS	0.552444	12.0341	3.51346	0.000888457	0.0356103
seq.20187.10	ITGAV|ITGB3	0.586668	11.8289	3.5178	0.0008767	0.0356103
seq.19388.2	CDH12	-0.326582	9.56799	-3.50529	0.000911026	0.0359235
seq.4979.34	DPT	0.316295	10.7995	3.50589	0.00090936	0.0359235
seq.12788.6	SGF29	-0.141307	9.21548	-3.49316	0.000944044	0.0361344
seq.14273.19	PREP	0.239377	11.2377	3.49537	0.000937669	0.0361344
seq.21698.11	ITGA11|ITGB1	0.254478	9.74401	3.49253	0.000947392	0.0361344
seq.21104.37	UBL5	0.371741	12.5597	3.49921	0.000926728	0.0361344
seq.10558.26	PCDH9	0.490548	13.4662	3.49732	0.000932824	0.0361344
seq.12395.86	DARS2	1.08969	13.8324	3.49201	0.000948906	0.0361344
seq.9288.7	FKBP7	0.276365	10.6329	3.48964	0.000955819	0.0361908
seq.6404.20	C1QL1	-0.16509	9.94797	-3.48174	0.000977685	0.0363267
seq.8690.25	CAV3	-0.0949045	9.00408	-3.48316	0.000973406	0.0363267
seq.9793.145	IGDCC4	0.30232	10.2983	3.48107	0.000981214	0.0363267
seq.17514.48	RAB21	0.518393	15.8932	3.48115	0.000980901	0.0363267
seq.3178.5	CTSC	-0.0909047	9.66024	-3.47046	0.00101195	0.0372576
seq.14091.42	CBR3	0.355155	11.2924	3.46884	0.00101858	0.0372955
seq.17345.12	ZADH2	0.960809	12.2861	3.46661	0.00102552	0.0373447
seq.2670.67	CKM	0.44331	9.65918	3.46155	0.00104147	0.0377194
seq.15515.2	SAA1	-1.92463	14.2111	-3.45211	0.00107187	0.0385089
seq.22085.86	BMI1	-0.125983	9.31539	-3.45069	0.00107483	0.0385089
seq.15499.11	ATRN	0.204351	10.0967	3.44908	0.00108116	0.0385285
seq.3381.24	LYN	0.52068	16.5209	3.44258	0.00110342	0.0391128
seq.7152.5	HAVCR2	-0.220518	11.7823	-3.43755	0.00111867	0.0394434
seq.8901.40	YWHAG	0.437519	15.9206	3.43468	0.00112925	0.039607
seq.8841.65	CILP2	0.623972	11.8473	3.4329	0.00113634	0.039647
seq.21661.82	FAM20C	-0.207146	15.9872	-3.42246	0.00117113	0.040229
seq.5307.12	F9	-0.159155	13.3321	-3.42373	0.00116661	0.040229
seq.9377.25	KITLG	0.284629	10.6146	3.42387	0.00116791	0.040229
seq.14064.21	PGLYRP1	-0.121732	8.84193	-3.41815	0.00118653	0.0402775
seq.16593.3	FADD	-0.110916	11.678	-3.41839	0.00118565	0.0402775
seq.16885.49	MAPRE3	0.331458	16.1739	3.41616	0.0011937	0.0402775
seq.19148.58	TIMM8A	0.441576	9.16848	3.41416	0.00120276	0.0402775
seq.11355.10	EIF5A2	0.712425	14.1685	3.4154	0.00119826	0.0402775
seq.11214.40	DNAJB9	-0.255212	13.937	-3.41167	0.00121005	0.0403188
seq.24901.4	VIL1	0.853038	13.3234	3.41011	0.00121761	0.0403688
seq.2771.35	IGFBP1	0.460065	14.3911	3.40696	0.00122811	0.0405155
seq.9604.14	CDH11	0.375328	12.7355	3.39793	0.00126144	0.0411403
seq.4960.72	ANXA1	0.552967	15.4301	3.39848	0.00126115	0.0411403
seq.8095.213	PPIF	1.06608	12.268	3.39732	0.00126557	0.0411403
seq.15491.20	CD248	0.404647	13.5837	3.39489	0.00127316	0.041186
seq.3054.3	HP	-3.05746	13.4425	-3.39305	0.00128201	0.041272
seq.23528.199	PHYHIPL	-0.307274	9.23011	-3.38062	0.00133094	0.0419124
seq.2997.8	JAM2	0.134424	12.8413	3.38152	0.0013254	0.0419124
seq.6555.58	STOML2	0.202952	10.2591	3.38169	0.00132559	0.0419124
seq.23672.10	PSMD6	0.356724	11.5906	3.38613	0.00130895	0.0419124
seq.21344.31	TFB1M	0.890373	10.3683	3.38002	0.00133335	0.0419124
seq.12560.9	NT5C	0.464021	11.6917	3.36872	0.00137948	0.0429573
seq.25266.14	OSBPL1A	0.675263	11.2362	3.36913	0.00137774	0.0429573
seq.10506.53	PGRMC2	0.242363	10.7414	3.36544	0.00139237	0.0430859
seq.14047.78	BDNF	0.492911	13.1955	3.36449	0.00139654	0.0430859
seq.23588.9	HSDL2	0.318306	13.0131	3.3618	0.00140641	0.0431905
seq.20562.78	KLRB1	-0.277411	10.2265	-3.34835	0.00146642	0.0447982
seq.25042.3	ME2	0.678258	16.1907	3.34703	0.00147221	0.0447982
seq.6414.8	OAF	-0.223646	13.0885	-3.34311	0.0014875	0.0450576
seq.24679.35	ETV7	0.193658	11.6687	3.33756	0.00151241	0.0456049
seq.20441.35	POLR2E	0.291603	10.588	3.32852	0.001556	0.0467082
seq.3070.1	IL2	-0.337282	11.3804	-3.32472	0.00157377	0.0470296
seq.15534.26	MDH2	0.731104	15.669	3.32057	0.00159337	0.0474026
seq.20586.18	CNTN3	0.250431	10.094	3.31493	0.00162038	0.0478244
seq.18922.27	CD68	0.256639	11.5216	3.31417	0.0016219	0.0478244
seq.2567.5	CFI	-0.182426	15.9566	-3.31015	0.00164138	0.0478343
seq.7856.51	FAM151A	-0.137638	10.5586	-3.31071	0.00163868	0.0478343
seq.12594.5	GCA	0.362784	10.0704	3.31012	0.00164377	0.0478343
seq.11174.8	THSD7A	-0.291231	10.8876	-3.30706	0.00165882	0.0480625
seq.25451.39	YAP1	0.198409	10.1668	3.29421	0.00172225	0.0496843
